# Supplementary material for: Hibernation-Induced microRNA Expression Promotes Signaling Pathways and Cell Cycle Dysregulation in Ictidomys tridecemlineatus Cardiac Tissue
Source: MDPI journal article supplement (doi:10.3390/metabo13101096), 2023-10-19
Supplement: s1 [file s1]

**Table S1.** miRNAs differential expression.

| MicroRNA     | Log FC       | Average Expression | p-value     |
|--------------|--------------|--------------------|-------------|
| let-7b-5p    | -0.257767565 | 9.590098599        | 0.786188028 |
| let-7d-3p    | 1.143899591  | 8.835562853        | 0.178495926 |
| let-7e-5p    | 2.01728148   | 8.918097648        | 0.011511287 |
| miR-1-3p     | 0.236863137  | 8.771163125        | 0.733937209 |
| miR-10527-5p | 0.650831278  | 11.00779943        | 0.482423314 |
| miR-12135    | 0.284835294  | 9.79232893         | 0.772316247 |
| miR-122-5p   | 2.068984293  | 9.030464054        | 0.040497256 |
| miR-1247-5p  | 0.44794322   | 8.365218213        | 0.367052683 |
| miR-1260b    | 0.975807489  | 12.15544915        | 0.165156848 |
| miR-1301-3p  | -1.04637832  | 13.61008464        | 0.147164728 |
| miR-1323     | 2.314613299  | 12.47942818        | 0.237468876 |
| miR-1343-3p  | -0.761378133 | 16.15781987        | 0.427930901 |
| miR-1343-5p  | 1.235509718  | 8.69103246         | 0.124301392 |
| miR-181d-3p  | -0.318192262 | 8.89642668         | 0.533309385 |
| miR-181d-5p  | -0.214402767 | 11.9283733         | 0.772966579 |
| miR-18a-3p   | -1.779454691 | 9.942831982        | 0.105986128 |
| miR-1973     | 0.447601849  | 9.82355904         | 0.589481077 |
| miR-208a-5p  | 0.065272778  | 8.612857599        | 0.927275068 |
| miR-2114-5p  | 2.355745141  | 12.31749217        | 0.213979363 |
| miR-221-3p   | 0.673837234  | 8.227059822        | 0.145217306 |
| miR-2355-3p  | -2.063005204 | 9.488152162        | 0.015353623 |
| miR-23b-3p   | 0.615898489  | 8.228192794        | 0.177043907 |
| miR-23c      | 0.702380433  | 8.508031262        | 0.161539061 |
| miR-24-3p    | 0.808660928  | 8.64860479         | 0.361660836 |
| miR-26a-5p   | 0.279824751  | 10.11404847        | 0.700227575 |
| miR-27a-3p   | -0.491017148 | 8.415111781        | 0.359041941 |
| miR-27b-3p   | -0.435545339 | 8.98424124         | 0.533977786 |
| miR-3064-5p  | 0.910641912  | 8.732741792        | 0.280916133 |
| miR-3074-5p  | 1.077443098  | 8.82675008         | 0.184744521 |
| miR-30a-3p   | -0.660609542 | 16.70819256        | 0.337206309 |
| miR-30a-5p   | -0.648330312 | 8.254272551        | 0.204230889 |
| miR-30b-3p   | -0.59670685  | 13.56310586        | 0.336341377 |
| miR-30c-1-3p | -0.135022501 | 13.51796779        | 0.828600474 |
| miR-30c-2-3p | -0.315064839 | 16.34869336        | 0.617709676 |
| miR-30d-3p   | 1.0674587    | 11.09961909        | 0.239852043 |
| miR-30e-3p   | -1.072803706 | 15.90652981        | 0.173564996 |
| miR-32-3p    | 0.949969462  | 8.623658006        | 0.256566636 |
| miR-3613-3p  | 0.150152735  | 11.39523213        | 0.858551927 |
| miR-3613-5p  | -0.23520085  | 13.22417841        | 0.792874549 |
| miR-3671     | -0.542323231 | 8.742694655        | 0.28516143  |
| miR-376c-3p  | 0.278637965  | 8.766562943        | 0.681213857 |
| miR-378a-3p  | -0.102902201 | 11.85950382        | 0.872992618 |
| miR-378c     | -0.147774263 | 11.55598111        | 0.843773533 |
| miR-378i     | -1.667304842 | 8.789656105        | 0.024855717 |
| miR-421      | 0.604726575  | 13.9671473         | 0.451063385 |
| miR-425-3p   | 0.372432097  | 9.764943723        | 0.668167593 |
| miR-4454     | 0.578370887  | 11.70914105        | 0.590196076 |
| miR-4484     | -1.217522006 | 9.316686715        | 0.286714833 |
| miR-4485-3p  | 0.023955197  | 10.52703801        | 0.978893422 |

|              |              |             |             |
|--------------|--------------|-------------|-------------|
| miR-4488     | 2.117544273  | 10.04127104 | 0.216044322 |
| miR-454-3p   | -2.202353153 | 9.277720574 | 0.03554327  |
| miR-4695-3p  | 0.597284192  | 8.427523947 | 0.193507196 |
| miR-483-5p   | 1.032159453  | 9.992445746 | 0.291445245 |
| miR-486-5p   | -0.023628752 | 8.441727157 | 0.967237738 |
| miR-493-3p   | -1.601720573 | 12.13938222 | 0.062398439 |
| miR-493-5p   | -0.579272167 | 14.75937321 | 0.41320258  |
| miR-503-5p   | 0.615898489  | 8.228192794 | 0.177043907 |
| miR-504-5p   | 0.075194964  | 9.014646294 | 0.91734928  |
| miR-5100     | 0.408305956  | 10.86649269 | 0.680097898 |
| miR-512-3p   | -0.13612152  | 8.397206268 | 0.804463915 |
| miR-515-3p   | 1.697248663  | 10.81967378 | 0.295461665 |
| miR-515-5p   | -0.308439573 | 9.114614648 | 0.750864788 |
| miR-517a-3p  | 0.08148892   | 9.685051367 | 0.933622221 |
| miR-517b-3p  | 0.08148892   | 9.685051367 | 0.933622221 |
| miR-518c-3p  | -0.574959703 | 9.620373091 | 0.565468736 |
| miR-524-5p   | 0.384825112  | 9.133264293 | 0.616878294 |
| miR-6529-5p  | 0.01850486   | 16.14942946 | 0.976297297 |
| miR-663b     | 0.530179655  | 8.610435908 | 0.346120637 |
| miR-6715b-3p | -1.785596654 | 8.92608118  | 0.024697274 |
| miR-769-3p   | 0.17909617   | 12.95901879 | 0.807924222 |
| miR-769-5p   | -0.092104569 | 15.93849867 | 0.89259804  |
| miR-7704     | 0.612339045  | 12.72541658 | 0.394217322 |
| miR-92b-5p   | 0.912742064  | 8.60008553  | 0.283031217 |
| miR-93-3p    | -0.950567827 | 11.44550153 | 0.210670596 |
| miR-93-5p    | -0.456602    | 12.11237832 | 0.512869265 |
| miR-935      | -0.782858727 | 10.73810529 | 0.459692819 |
| miR-95-3p    | 0.520872354  | 16.64424777 | 0.455730214 |
| miR-9851-3p  | -1.965001558 | 10.34341884 | 0.025475125 |

**Table S2.** miRNA GO biological processes.

| GO Term                                                                     | Genes Tested | Model Coefficient | p-value     |
|-----------------------------------------------------------------------------|--------------|-------------------|-------------|
| POSITIVE REGULATION OF VIRAL TRANSCRIPTION                                  | 39           | -0.078311167      | 0.542300703 |
| CARDIAC CHAMBER DEVELOPMENT                                                 | 130          | 0.057699495       | 0.42844073  |
| DNA DEPENDENT DNA REPLICATION MAINTENANCE OF FIDELITY                       | 23           | -0.235053966      | 0.132979454 |
| CIRCADIAN RHYTHM                                                            | 118          | 0.013507728       | 0.858591625 |
| PHOSPHATIDYLSERINE ACYL CHAIN REMODELING                                    | 12           | 0.179057287       | 0.45624813  |
| SPINAL CORD DEVELOPMENT                                                     | 84           | 0.071855289       | 0.42809703  |
| PLATELET DERIVED GROWTH FACTOR RECEPTOR SIGNALING PATHWAY                   | 32           | -0.057945153      | 0.685071577 |
| CELLULAR RESPONSE TO LIPOPROTEIN PARTICLE STIMULUS                          | 12           | -0.255788847      | 0.234913356 |
| REGULATION OF NLRP3 INFLAMMASOME COMPLEX ASSEMBLY                           | 6            | 0.262823783       | 0.433000517 |
| POSITIVE REGULATION OF EPITHELIAL CELL DIFFERENTIATION                      | 46           | 0.108382648       | 0.377759208 |
| POSITIVE REGULATION OF KINASE ACTIVITY                                      | 433          | -0.044396152      | 0.261101665 |
| NEGATIVE REGULATION OF TRANSCRIPTION FACTOR IMPORT INTO NUCLEUS             | 37           | 0.12893907        | 0.348226826 |
| POTASSIUM ION TRANSPORT                                                     | 105          | 0.13447175        | 0.099276899 |
| REGULATION OF T CELL RECEPTOR SIGNALING PATHWAY                             | 26           | -0.068532963      | 0.664306907 |
| CARDIAC MUSCLE ADAPTATION                                                   | 8            | 0.297783911       | 0.299694675 |
| NEGATIVE REGULATION OF EPITHELIAL CELL PROLIFERATION                        | 98           | -0.037815854      | 0.645424414 |
| MOVEMENT IN ENVIRONMENT OF OTHER ORGANISM INVOLVED IN SYMBIOTIC INTERACTION | 82           | 0.026532124       | 0.770793028 |
| REGULATION OF PROTEIN TARGETING TO MITOCHONDRION                            | 80           | -0.11218016       | 0.207483997 |
| APICAL PROTEIN LOCALIZATION                                                 | 12           | 0.254363537       | 0.296966815 |
| REGULATION OF ESTABLISHMENT OF PLANAR POLARITY                              | 103          | -0.085615085      | 0.279517133 |
| FOREBRAIN NEURON DEVELOPMENT                                                | 30           | 0.104773337       | 0.491039555 |
| POSITIVE REGULATION OF PROTEIN MATURATION                                   | 15           | 0.050870229       | 0.81155953  |
| NEUROMUSCULAR JUNCTION DEVELOPMENT                                          | 30           | -0.153835591      | 0.282168217 |
| MITOTIC CYTOKINESIS                                                         | 28           | -0.212044227      | 0.142381845 |

|                                                                    |     |              |             |
|--------------------------------------------------------------------|-----|--------------|-------------|
| NEGATIVE REGULATION OF RESPONSE TO ENDOPLASMIC RETICULUM STRESS    | 39  | -0.234186489 | 0.054504564 |
| SMAD PROTEIN SIGNAL TRANSDUCTION                                   | 43  | 0.106755473  | 0.400867307 |
| CYTOPLASMIC TRANSLATION                                            | 40  | -0.36843619  | 0.001488424 |
| MEIOTIC CHROMOSOME SEGREGATION                                     | 52  | 0.005427439  | 0.961950314 |
| POSITIVE REGULATION OF CALCIUM ION TRANSPORT                       | 89  | -0.200260704 | 0.014627842 |
| REGULATION OF DOUBLE STRAND BREAK REPAIR                           | 35  | 0.082524992  | 0.556831078 |
| RNA DEPENDENT DNA BIOSYNTHETIC PROCESS                             | 20  | -0.185864081 | 0.286705202 |
| REGULATION OF B CELL RECEPTOR SIGNALING PATHWAY                    | 15  | 0.16088039   | 0.460323245 |
| REGULATION OF G PROTEIN COUPLED RECEPTOR PROTEIN SIGNALING PATHWAY | 101 | 0.002387189  | 0.976693403 |
| DENDRITE DEVELOPMENT                                               | 65  | -0.108377042 | 0.273369452 |
| REGULATION OF RESPIRATORY BURST                                    | 10  | -0.173534853 | 0.481341451 |
| G PROTEIN COUPLED RECEPTOR INTERNALIZATION                         | 10  | 0.192660528  | 0.461702672 |
| MEMORY                                                             | 81  | -0.08898947  | 0.317741739 |
| NEURON DEVELOPMENT                                                 | 595 | 0.03707889   | 0.281925637 |
| REGULATION OF GOLGI ORGANIZATION                                   | 12  | 0.451220435  | 0.040308472 |
| ENDOTHELIAL CELL DEVELOPMENT                                       | 42  | -0.099273389 | 0.421567212 |
| POSITIVE REGULATION OF MYOTUBE DIFFERENTIATION                     | 25  | -0.0628827   | 0.69634427  |
| REGULATION OF CELL ACTIVATION                                      | 396 | -0.060450196 | 0.141261981 |
| MULTICELLULAR ORGANISM AGING                                       | 28  | -0.266639248 | 0.063193699 |
| ATP DEPENDENT CHROMATIN REMODELING                                 | 71  | -0.212435948 | 0.020068117 |
| ANATOMICAL STRUCTURE FORMATION INVOLVED IN MORPHOGENESIS           | 840 | 0.010938871  | 0.707032184 |
| ION TRANSPORT                                                      | 992 | 0.028452675  | 0.292167114 |
| LIPID MODIFICATION                                                 | 186 | 0.144811647  | 0.018599829 |
| NEGATIVE REGULATION OF KIDNEY DEVELOPMENT                          | 16  | 0.028773594  | 0.888809684 |
| REGULATION OF HEPATOCYTE PROLIFERATION                             | 11  | -0.278686397 | 0.218909841 |
| ACYLGLYCEROL HOMEOSTASIS                                           | 20  | 0.312629115  | 0.086764417 |
| NEGATIVE REGULATION OF PHOSPHOPROTEIN PHOSPHATASE ACTIVITY         | 15  | 0.09937388   | 0.643424827 |
| NEGATIVE REGULATION OF PROTEIN COMPLEX ASSEMBLY                    | 94  | 0.095542051  | 0.266397227 |
| HEMOGLOBIN METABOLIC PROCESS                                       | 6   | 0.00555061   | 0.986757588 |
| SINGLE FERTILIZATION                                               | 73  | -0.048077741 | 0.612355053 |
| LEUKOCYTE ACTIVATION                                               | 349 | -0.074206543 | 0.08839381  |
| CHROMOSOME ORGANIZATION                                            | 909 | -0.033315988 | 0.230883026 |
| REGULATION OF MITOCHONDRIAL DEPOLARIZATION                         | 14  | -0.026226155 | 0.903966695 |
| NEGATIVE REGULATION OF MAP KINASE ACTIVITY                         | 68  | -0.149129106 | 0.119001259 |
| SYNAPTIC VESICLE LOCALIZATION                                      | 88  | 0.002102372  | 0.980830293 |
| PHENOL CONTAINING COMPOUND METABOLIC PROCESS                       | 60  | 0.098406665  | 0.35958199  |
| REGULATION OF ANTIGEN RECEPTOR MEDIATED SIGNALING PATHWAY          | 39  | -0.001843673 | 0.98878022  |
| ESTABLISHMENT OF SPINDLE ORIENTATION                               | 25  | -0.105128757 | 0.509697617 |
| METANEPHRIC NEPHRON MORPHOGENESIS                                  | 17  | -0.02505975  | 0.898966762 |
| GLYCERALDEHYDE 3 PHOSPHATE METABOLIC PROCESS                       | 18  | -0.006414004 | 0.973441006 |
| RESPONSE TO UV C                                                   | 10  | 0.376366962  | 0.140582762 |
| CARBOHYDRATE CATABOLIC PROCESS                                     | 94  | -0.009160695 | 0.913636453 |
| DENTATE GYRUS DEVELOPMENT                                          | 11  | 0.39240615   | 0.111871932 |
| ESTABLISHMENT OR MAINTENANCE OF TRANSMEMBRANE                      | 10  | 0.241481548  | 0.362138269 |
| ELECTROCHEMICAL GRADIENT                                           | 42  | 0.448447933  | 0.000164397 |
| LABYRINTHINE LAYER DEVELOPMENT                                     | 14  | -0.227969182 | 0.259749971 |
| N TERMINAL PROTEIN AMINO ACID ACETYLATION                          | 655 | 0.073898681  | 0.025561538 |
| NEUROLOGICAL SYSTEM PROCESS                                        | 13  | 0.228937698  | 0.3199391   |
| NEURONAL STEM CELL DIVISION                                        | 8   | 0.188602106  | 0.519615371 |
| CERAMIDE CATABOLIC PROCESS                                         | 29  | 0.163670212  | 0.291791846 |
| EXCRETION                                                          | 89  | 0.189263187  | 0.033132707 |
| DIGESTION                                                          | 15  | -0.233768867 | 0.227969806 |
| POSITIVE REGULATION OF SYNAPTIC TRANSMISSION GLUTAMATERGIC         | 46  | -0.1267384   | 0.277991235 |
| POSITIVE REGULATION OF MITOTIC NUCLEAR DIVISION                    | 120 | -0.028949187 | 0.697533308 |
| HINDBRAIN DEVELOPMENT                                              | 54  | -0.087282723 | 0.423394462 |
| OLIGOSACCHARIDE METABOLIC PROCESS                                  | 10  | -0.540609144 | 0.010450219 |
| NEGATIVE REGULATION OF DENDRITIC SPINE DEVELOPMENT                 | 11  | 0.333397189  | 0.17198357  |
| MODULATION OF GROWTH OF SYMBIONT INVOLVED IN INTERACTION WITH HOST | 246 | -0.140447199 | 0.005645596 |
| CHROMOSOME SEGREGATION                                             | 28  | -0.312639318 | 0.025083924 |
| NEGATIVE REGULATION OF CYCLIN DEPENDENT PROTEIN KINASE ACTIVITY    | 9   | 0.093970273  | 0.734332468 |
| ETHER METABOLIC PROCESS                                            | 91  | -0.07110088  | 0.400364692 |
| HEMATOPOIETIC PROGENITOR CELL DIFFERENTIATION                      | 14  | 0.421573272  | 0.050119478 |
| CYTOKINE METABOLIC PROCESS                                         | 25  | -0.024825343 | 0.878823299 |
| ANTEROGRADE AXONAL TRANSPORT                                       |     |              |             |

|                                                                                           |     |              |             |
|-------------------------------------------------------------------------------------------|-----|--------------|-------------|
| NEGATIVE REGULATION OF ERK1 AND ERK2 CASCADE                                              | 48  | -0.048407842 | 0.678924551 |
| STEROID BIOSYNTHETIC PROCESS                                                              | 88  | -0.013393896 | 0.877921536 |
| ALDITOL PHOSPHATE METABOLIC PROCESS                                                       | 28  | 0.097297528  | 0.535743578 |
| SODIUM INDEPENDENT ORGANIC ANION TRANSPORT                                                | 14  | -0.148057853 | 0.478422478 |
| REGULATION OF PROTEIN TYROSINE KINASE ACTIVITY                                            | 55  | 0.07381894   | 0.510029488 |
| REGULATION OF INTERFERON BETA PRODUCTION                                                  | 39  | -0.220728753 | 0.072500171 |
| DNA TEMPLATED TRANSCRIPTION ELONGATION                                                    | 92  | -0.05618866  | 0.505561448 |
| N GLYCAN PROCESSING                                                                       | 17  | 0.072605712  | 0.718146743 |
| INORGANIC ION IMPORT INTO CELL                                                            | 14  | 0.289022572  | 0.194008893 |
| ENDOPLASMIC RETICULUM TO CYTOSOL TRANSPORT                                                | 23  | -0.319614345 | 0.045597275 |
| NEGATIVE REGULATION OF REPRODUCTIVE PROCESS                                               | 41  | 0.045833666  | 0.722454033 |
| G PROTEIN COUPLED PURINERGIC RECEPTOR SIGNALING PATHWAY                                   | 15  | -0.005388937 | 0.979630961 |
| MEMBRANE DEPOLARIZATION                                                                   | 51  | 0.023317476  | 0.83971486  |
| OLFACTORY BULB INTERNEURON DIFFERENTIATION                                                | 13  | 0.008677934  | 0.969558943 |
| POSITIVE REGULATION OF G PROTEIN COUPLED RECEPTOR PROTEIN SIGNALING PATHWAY               | 19  | 0.114749424  | 0.547965083 |
| ATTACHMENT OF SPINDLE MICROTUBULES TO KINETOCHORE                                         | 13  | -0.682106393 | 7.03E-05    |
| REGULATION OF LYASE ACTIVITY                                                              | 59  | -0.051867129 | 0.622499068 |
| RESPONSE TO NITROGEN COMPOUND                                                             | 732 | -0.049499912 | 0.106632214 |
| NEGATIVE REGULATION OF TRANSMEMBRANE TRANSPORT                                            | 74  | -0.042031779 | 0.656130919 |
| REGULATION OF DNA RECOMBINATION                                                           | 53  | 0.067870893  | 0.551614299 |
| REGULATION OF LEUKOCYTE PROLIFERATION                                                     | 173 | -0.091219721 | 0.135815539 |
| RESPONSE TO ETHANOL                                                                       | 113 | 0.012989618  | 0.866809389 |
| SULFUR COMPOUND METABOLIC PROCESS                                                         | 302 | -0.05640418  | 0.2294525   |
| POSITIVE REGULATION OF TYROSINE PHOSPHORYLATION OF STAT1 PROTEIN                          | 10  | 0.412506892  | 0.114889226 |
| REGULATION OF CELL CYCLE CHECKPOINT                                                       | 28  | 0.290552808  | 0.067855148 |
| NEGATIVE REGULATION OF TRANSCRIPTION REGULATORY REGION DNA BINDING                        | 16  | 0.129228721  | 0.533796852 |
| POSITIVE REGULATION OF DNA REPLICATION                                                    | 76  | 0.032521277  | 0.731288918 |
| NEGATIVE REGULATION OF NEURON APOPTOTIC PROCESS                                           | 125 | -0.016668574 | 0.819868032 |
| POSITIVE REGULATION OF REPRODUCTIVE PROCESS                                               | 42  | 0.146699994  | 0.25562387  |
| POSITIVE REGULATION OF METANEPHROS DEVELOPMENT                                            | 12  | 0.041692403  | 0.861050538 |
| POSITIVE REGULATION OF LYMPHOCYTE APOPTOTIC PROCESS                                       | 16  | -0.191336582 | 0.319547789 |
| NUCLEOTIDE PHOSPHORYLATION                                                                | 52  | 0.06292405   | 0.584049023 |
| POSITIVE REGULATION OF GENE EXPRESSION EPIGENETIC                                         | 75  | 0.004040381  | 0.965995458 |
| GLUTAMATE SECRETION                                                                       | 26  | -0.142095672 | 0.357738937 |
| REGULATION OF MRNA METABOLIC PROCESS                                                      | 109 | -0.032759618 | 0.674723653 |
| POSITIVE REGULATION OF PROTEIN BINDING                                                    | 71  | -0.037889046 | 0.694497368 |
| REGULATION OF NFAT PROTEIN IMPORT INTO NUCLEUS                                            | 16  | -0.033203898 | 0.87008196  |
| REGULATION OF VASCULOGENESIS                                                              | 13  | -0.157880943 | 0.464149704 |
| LENS FIBER CELL DIFFERENTIATION                                                           | 19  | 0.067985272  | 0.720473423 |
| SENSORY PERCEPTION                                                                        | 402 | 0.106950704  | 0.010937202 |
| HEPATICOBILIARY SYSTEM DEVELOPMENT                                                        | 114 | 0.004576885  | 0.952589917 |
| FATTY ACID CATABOLIC PROCESS                                                              | 64  | 0.110390385  | 0.288687569 |
| REGULATION OF VESICLE FUSION                                                              | 52  | 0.07506254   | 0.514331289 |
| MITOCHONDRIAL RESPIRATORY CHAIN COMPLEX I BIOGENESIS                                      | 55  | -0.095215326 | 0.376584694 |
| REGULATION OF LIPID STORAGE                                                               | 36  | 0.086579628  | 0.532287598 |
| CARBOHYDRATE TRANSPORT                                                                    | 71  | -0.077800337 | 0.414690172 |
| REGULATION OF CELLULAR RESPONSE TO GROWTH FACTOR STIMULUS                                 | 207 | 0.078916841  | 0.174169395 |
| EMBRYONIC HEMOPOIESIS                                                                     | 16  | -0.224074386 | 0.240143108 |
| EMBRYO DEVELOPMENT ENDING IN BIRTH OR EGG HATCHING                                        | 507 | 0.010823261  | 0.770103184 |
| ANTIGEN PROCESSING AND PRESENTATION OF PEPTIDE OR POLYSACCHARIDE ANTIGEN VIA MHC CLASS II | 85  | -0.024401929 | 0.782733073 |
| RESPONSE TO IONIZING RADIATION                                                            | 135 | -0.084655441 | 0.221519831 |
| PROTEIN EXPORT FROM NUCLEUS                                                               | 29  | 0.299146503  | 0.060403964 |
| EPITHELIUM DEVELOPMENT                                                                    | 797 | 0.036165251  | 0.227621469 |
| POSITIVE REGULATION OF SEQUESTERING OF CALCIUM ION                                        | 16  | -0.118407793 | 0.548745233 |
| SECONDARY METABOLITE BIOSYNTHETIC PROCESS                                                 | 15  | 0.135030134  | 0.528449107 |
| CELL MIGRATION INVOLVED IN HEART DEVELOPMENT                                              | 13  | -0.175277919 | 0.41400484  |
| PROTEIN LOCALIZATION TO CYTOSKELETON                                                      | 28  | -0.00221083  | 0.988594981 |
| NUCLEAR ENVELOPE REASSEMBLY                                                               | 17  | -0.35148138  | 0.051666006 |
| INTRINSIC APOPTOTIC SIGNALING PATHWAY IN RESPONSE TO DNA DAMAGE BY P53 CLASS MEDIATOR     | 29  | -0.265382949 | 0.053403264 |
| REGULATION OF AUTOPHAGY                                                                   | 230 | -0.038658712 | 0.473139912 |
| PHOSPHOLIPID METABOLIC PROCESS                                                            | 313 | 0.010615669  | 0.820652669 |
| AMMONIUM ION METABOLIC PROCESS                                                            | 133 | 0.022935976  | 0.748629165 |

|                                                                                      |     |              |             |
|--------------------------------------------------------------------------------------|-----|--------------|-------------|
| REGULATION OF INTERLEUKIN 4 PRODUCTION                                               | 21  | 0.31172669   | 0.090436044 |
| NCRNA CATABOLIC PROCESS                                                              | 20  | -0.052701638 | 0.7705869   |
| REGULATION OF FAT CELL DIFFERENTIATION                                               | 96  | 0.004211787  | 0.959930274 |
| GLUTAMINE FAMILY AMINO ACID BIOSYNTHETIC PROCESS                                     | 18  | -0.084464372 | 0.654921921 |
| REGULATION OF PROTEIN ACTIVATION CASCADE                                             | 26  | 0.241882571  | 0.135553694 |
| REGULATION OF TELOMERASE RNA LOCALIZATION TO CAJAL BODY                              | 15  | -0.109867544 | 0.592939234 |
| REGULATION OF RNA STABILITY                                                          | 132 | -0.064829775 | 0.357141508 |
| BUNDLE OF HIS CELL TO PURKINJE MYOCYTE COMMUNICATION                                 | 10  | 0.060962919  | 0.815875106 |
| REGULATION OF CELL MATURATION                                                        | 15  | -0.188048476 | 0.347211357 |
| NEGATIVE REGULATION OF CELL DEVELOPMENT                                              | 262 | -0.011548176 | 0.820364091 |
| MAMMARY GLAND MORPHOGENESIS                                                          | 33  | -0.046229653 | 0.74294239  |
| CELLULAR PROTEIN COMPLEX DISASSEMBLY                                                 | 114 | -0.161086499 | 0.0281719   |
| REGULATION OF CYTOKINE PRODUCTION INVOLVED IN INFLAMMATORY RESPONSE                  | 14  | 0.337445667  | 0.112215765 |
| URETER DEVELOPMENT                                                                   | 10  | -0.238456867 | 0.317509872 |
| BODY MORPHOGENESIS                                                                   | 38  | 0.016743466  | 0.900069737 |
| SOMATIC STEM CELL POPULATION MAINTENANCE                                             | 62  | 0.11336615   | 0.285179035 |
| CYTOPLASMIC MICROTUBULE ORGANIZATION                                                 | 35  | -0.062213515 | 0.648249952 |
| POSITIVE REGULATION OF DNA DAMAGE RESPONSE SIGNAL TRANSDUCTION BY P53 CLASS MEDIATOR | 13  | -0.075639464 | 0.733999785 |
| PROTEIN ACTIVATION CASCADE                                                           | 49  | 0.274298897  | 0.019105628 |
| POSITIVE REGULATION OF PHOSPHOLIPASE ACTIVITY                                        | 41  | -0.116552927 | 0.348243753 |
| NEGATIVE REGULATION OF PEPTIDYL TYROSINE PHOSPHORYLATION                             | 36  | -0.013675377 | 0.91995289  |
| REGULATION OF COLLATERAL SPROUTING                                                   | 17  | 0.288492997  | 0.14961819  |
| ESTABLISHMENT OR MAINTENANCE OF MONOPOLAR CELL POLARITY                              | 15  | -0.156214794 | 0.443112461 |
| NEURON RECOGNITION                                                                   | 27  | 0.077171774  | 0.6286033   |
| NUCLEOSIDE DIPHOSPHATE METABOLIC PROCESS                                             | 74  | 0.038259281  | 0.690351163 |
| MICROTUBULE POLYMERIZATION OR DEPOLYMERIZATION                                       | 34  | 0.107959367  | 0.450154584 |
| RESPONSE TO AMMONIUM ION                                                             | 44  | -0.148230507 | 0.211476703 |
| REGULATION OF INTERLEUKIN 5 PRODUCTION                                               | 11  | 0.426505006  | 0.064148985 |
| REGULATION OF GLUCOSE IMPORT                                                         | 52  | -0.035467025 | 0.753031523 |
| NEGATIVE REGULATION OF PROTEOLYSIS                                                   | 265 | -0.013642331 | 0.787249267 |
| PINOCYTOSIS                                                                          | 10  | 0.259076983  | 0.324604114 |
| REGULATION OF EPITHELIAL CELL APOPTOTIC PROCESS                                      | 51  | -0.175247062 | 0.108036769 |
| PHOSPHATIDYLETHANOLAMINE METABOLIC PROCESS                                           | 16  | -0.280272767 | 0.132751017 |
| PHOSPHATIDYLCHOLINE METABOLIC PROCESS                                                | 46  | 0.05587587   | 0.647106941 |
| LUNG EPITHELIUM DEVELOPMENT                                                          | 31  | 0.192717486  | 0.199178671 |
| METENCEPHALON DEVELOPMENT                                                            | 85  | -0.054350218 | 0.536107675 |
| G PROTEIN COUPLED PURINERGIC NUCLEOTIDE RECEPTOR SIGNALING PATHWAY                   | 12  | 0.041869325  | 0.860422894 |
| ACTIN FILAMENT BUNDLE ORGANIZATION                                                   | 43  | -0.068861997 | 0.575074363 |
| CELLULAR RESPONSE TO VIRUS                                                           | 21  | -0.059943626 | 0.733408044 |
| CYTOPLASMIC MRNA PROCESSING BODY ASSEMBLY                                            | 12  | -0.305908231 | 0.15360164  |
| RESPIRATORY GASEOUS EXCHANGE                                                         | 40  | -0.006107853 | 0.962335453 |
| NEGATIVE REGULATION OF PROTEIN MODIFICATION BY SMALL PROTEIN CONJUGATION OR REMOVAL  | 129 | -0.114969281 | 0.101608667 |
| AMINO ACID ACTIVATION                                                                | 49  | -0.252674929 | 0.021242994 |
| DENDRITIC CELL DIFFERENTIATION                                                       | 29  | -0.090920847 | 0.541251735 |
| NATURAL KILLER CELL DIFFERENTIATION                                                  | 10  | -0.41998809  | 0.049978619 |
| BONE TRABECULA MORPHOGENESIS                                                         | 11  | 0.005177874  | 0.98327572  |
| REGULATION OF INFLAMMATORY RESPONSE TO ANTIGENIC STIMULUS                            | 16  | -0.056658848 | 0.778807104 |
| REGULATION OF PROTEASOMAL UBIQUITIN DEPENDENT PROTEIN CATABOLIC PROCESS              | 143 | -0.044787763 | 0.510375007 |
| NEGATIVE REGULATION OF NEURON DIFFERENTIATION                                        | 166 | -0.015470854 | 0.807888927 |
| REGULATION OF SKELETAL MUSCLE TISSUE DEVELOPMENT                                     | 44  | 0.221234076  | 0.079352488 |
| MUSCLE TISSUE DEVELOPMENT                                                            | 238 | -0.019023945 | 0.720783778 |
| NEGATIVE REGULATION OF PROTEIN AUTOPHOSPHORYLATION                                   | 9   | 0.074807778  | 0.78646277  |
| ACID SECRETION                                                                       | 54  | -0.047779772 | 0.664696295 |
| POSITIVE REGULATION OF ADAPTIVE IMMUNE RESPONSE                                      | 63  | -0.098009089 | 0.330593364 |
| REGULATION OF OSTEOCLAST DIFFERENTIATION                                             | 55  | -0.075798131 | 0.484184096 |
| REGULATION OF PROTEIN BINDING                                                        | 158 | 0.020608023  | 0.753771789 |
| CARDIAC SEPTUM DEVELOPMENT                                                           | 79  | -0.071100215 | 0.43322173  |
| REGULATION OF ICOSANOID SECRETION                                                    | 15  | 0.029169951  | 0.890821349 |
| L ALPHA AMINO ACID TRANSMEMBRANE TRANSPORT                                           | 30  | 0.035087998  | 0.815687599 |
| REGULATION OF HISTONE METHYLATION                                                    | 51  | -0.12760266  | 0.251257851 |
| POSITIVE REGULATION OF MITOCHONDRIAL FISSION                                         | 13  | -0.116557718 | 0.595645596 |

|                                                               |      |              |             |
|---------------------------------------------------------------|------|--------------|-------------|
| ANTIMICROBIAL HUMORAL RESPONSE                                | 32   | -0.109945068 | 0.433528945 |
| EPIDERMIS MORPHOGENESIS                                       | 26   | 0.13323672   | 0.415076145 |
| INTERMEDIATE FILAMENT BASED PROCESS                           | 36   | 0.061230901  | 0.65749014  |
| COGNITION                                                     | 214  | -0.027574313 | 0.622278975 |
| RESPONSE TO ZINC ION                                          | 46   | 0.04405059   | 0.717552413 |
| PURINE DEOXYRIBONUCLEOTIDE METABOLIC PROCESS                  | 14   | 0.131461438  | 0.554466813 |
| DISRUPTION OF CELLS OF OTHER ORGANISM                         | 19   | 0.280792575  | 0.138931132 |
| AXIS SPECIFICATION                                            | 76   | -0.03655458  | 0.695149699 |
| PHOSPHATIDYLINOSITOL METABOLIC PROCESS                        | 168  | 0.066355296  | 0.30154346  |
| CELL PART MORPHOGENESIS                                       | 550  | 0.071704764  | 0.046345322 |
| PIGMENT GRANULE LOCALIZATION                                  | 23   | 0.073024746  | 0.672362455 |
| VASCULAR ENDOTHELIAL GROWTH FACTOR SIGNALING PATHWAY          | 14   | 0.313378829  | 0.147800497 |
| RESPONSE TO ORGANOPHOSPHORUS                                  | 117  | -0.070133768 | 0.347215049 |
| AXO DENDRITIC TRANSPORT                                       | 34   | -0.01650717  | 0.906097989 |
| SINGLE ORGANISM MEMBRANE FUSION                               | 104  | 0.016382175  | 0.8392652   |
| REGULATION OF PROTEIN UBIQUITINATION INVOLVED IN UBIQUITIN    | 95   | -0.152582975 | 0.058562661 |
| DEPENDENT PROTEIN CATABOLIC PROCESS                           |      |              |             |
| SKELETAL MUSCLE TISSUE REGENERATION                           | 22   | 0.084543549  | 0.633338891 |
| POLYSACCHARIDE BIOSYNTHETIC PROCESS                           | 40   | 0.051552858  | 0.693434863 |
| REGULATION OF TYROSINE PHOSPHORYLATION OF STAT PROTEIN        | 58   | -0.094277765 | 0.369971223 |
| ORGAN REGENERATION                                            | 76   | -0.122514331 | 0.179111377 |
| GLAND MORPHOGENESIS                                           | 82   | -0.056085867 | 0.530371872 |
| NEGATIVE REGULATION OF ADAPTIVE IMMUNE RESPONSE               | 28   | 0.155206144  | 0.324614918 |
| REGULATION OF SYSTEMIC ARTERIAL BLOOD PRESSURE BY CIRCULATORY | 10   | 0.099698962  | 0.704122541 |
| RENIN ANGIOTENSIN                                             |      |              |             |
| RIBOSOME BIOGENESIS                                           | 298  | -0.092980647 | 0.047146256 |
| B CELL HOMEOSTASIS                                            | 20   | -0.274115395 | 0.112728877 |
| IRE1 MEDIATED UNFOLDED PROTEIN RESPONSE                       | 53   | -0.103812193 | 0.343363637 |
| SINGLE ORGANISM BEHAVIOR                                      | 315  | 0.019065148  | 0.683460124 |
| POSITIVE REGULATION OF CALCIUM ION DEPENDENT EXOCYTOSIS       | 20   | -0.241107886 | 0.154150032 |
| POSITIVE REGULATION OF ENDOCYTOSIS                            | 96   | 0.096080457  | 0.258926932 |
| MRNA SPLICE SITE SELECTION                                    | 25   | -0.372546746 | 0.011038711 |
| REGULATION OF TRANSLATION IN RESPONSE TO STRESS               | 19   | -0.182123432 | 0.305187118 |
| NEGATIVE REGULATION OF GENE EXPRESSION                        | 1339 | -0.004313157 | 0.853755165 |
| PHENOL CONTAINING COMPOUND BIOSYNTHETIC PROCESS               | 25   | 0.100298424  | 0.545697276 |
| POSITIVE REGULATION OF ERYTHROCYTE DIFFERENTIATION            | 22   | -0.056043593 | 0.744719193 |
| DENDRITIC CELL MIGRATION                                      | 18   | 0.196675783  | 0.313915347 |
| SENSORY PERCEPTION OF TEMPERATURE STIMULUS                    | 15   | 0.351189727  | 0.091723541 |
| LYSOSOMAL TRANSPORT                                           | 65   | 0.090032581  | 0.384249256 |
| CELLULAR CATABOLIC PROCESS                                    | 1156 | -0.0338313   | 0.173898    |
| POSITIVE REGULATION OF DNA BIOSYNTHETIC PROCESS               | 56   | 0.023224874  | 0.832848562 |
| POSITIVE REGULATION OF MACROPHAGE ACTIVATION                  | 8    | -0.080264438 | 0.776818332 |
| REGULATION OF CALCIUM MEDIATED SIGNALING                      | 62   | -0.1635793   | 0.098640136 |
| REGULATION OF ALPHA BETA T CELL ACTIVATION                    | 59   | 0.103669558  | 0.33987761  |
| MUSCLE ORGAN DEVELOPMENT                                      | 235  | 0.004452648  | 0.934079717 |
| POSITIVE REGULATION OF HEMOPOIESIS                            | 145  | -0.018839849 | 0.781662858 |
| OUTFLOW TRACT SEPTUM MORPHOGENESIS                            | 12   | 0.245980097  | 0.302320476 |
| REGULATION OF MAMMARY GLAND EPITHELIAL CELL PROLIFERATION     | 16   | 0.078154855  | 0.707072158 |
| REGULATION OF PHOSPHATIDYLINOSITOL 3 KINASE ACTIVITY          | 38   | -0.214019788 | 0.084690047 |
| CELLULAR RESPONSE TO EPIDERMAL GROWTH FACTOR STIMULUS         | 24   | -0.315152121 | 0.037041955 |
| LEUKOCYTE DEGRANULATION                                       | 25   | -0.21068778  | 0.169121382 |
| MYELOID CELL HOMEOSTASIS                                      | 78   | -0.225433695 | 0.010133108 |
| REGULATION OF BLOOD PRESSURE                                  | 135  | 0.109932077  | 0.126062412 |
| REGULATION OF MORPHOGENESIS OF A BRANCHING STRUCTURE          | 48   | -0.171127167 | 0.126938008 |
| RESPONSE TO ELECTRICAL STIMULUS                               | 34   | -0.135864574 | 0.313773473 |
| NEGATIVE REGULATION OF TELOMERE MAINTENANCE VIA TELOMERASE    | 12   | -0.534192977 | 0.005239507 |
| REGULATION OF T CELL CHEMOTAXIS                               | 10   | -0.576301    | 0.012588569 |
| REGULATION OF ESTABLISHMENT OF PLANAR POLARITY INVOLVED IN    | 13   | -0.112249357 | 0.609446974 |
| NEURAL TUBE CLOSURE                                           |      |              |             |
| REGULATION OF CYTOKINE PRODUCTION                             | 473  | -0.019395371 | 0.61034399  |
| REGULATION OF ERBB SIGNALING PATHWAY                          | 77   | -0.001409425 | 0.987964522 |
| REGULATION OF CHOLESTEROL HOMEOSTASIS                         | 11   | -0.214252188 | 0.366461462 |
| VENTRICULAR SEPTUM MORPHOGENESIS                              | 25   | 0.124230438  | 0.455861631 |
| POSITIVE REGULATION OF ENDOTHELIAL CELL CHEMOTAXIS            | 11   | 0.332182611  | 0.178194584 |
| POSITIVE REGULATION OF ENDOTHELIAL CELL DIFFERENTIATION       | 12   | 0.035886723  | 0.880102872 |
| NEGATIVE REGULATION OF SMOOTH MUSCLE CELL PROLIFERATION       | 34   | -0.004607811 | 0.973801605 |

|                                                                                    |      |              |             |
|------------------------------------------------------------------------------------|------|--------------|-------------|
| TOLERANCE INDUCTION                                                                | 11   | -0.368890656 | 0.099784819 |
| CHEMICAL HOMEOSTASIS                                                               | 707  | 0.046777039  | 0.141086785 |
| SYNAPSE ORGANIZATION                                                               | 126  | -0.091043104 | 0.202742818 |
| METANEPHROS DEVELOPMENT                                                            | 71   | 0.152576823  | 0.123964461 |
| REGULATION OF MICROTUBULE BASED PROCESS                                            | 218  | 0.021738537  | 0.698160293 |
| NEGATIVE REGULATION OF TRANSPORTER ACTIVITY                                        | 57   | -0.091206274 | 0.389956589 |
| ENDOSOME ORGANIZATION                                                              | 59   | 0.090095511  | 0.406299863 |
| REGULATION OF WOUND HEALING                                                        | 111  | 0.04924759   | 0.531216354 |
| REGULATION OF MAPK CASCADE                                                         | 563  | -0.00378197  | 0.914219701 |
| DEVELOPMENTAL PROGRAMMED CELL DEATH                                                | 24   | 0.289378517  | 0.086331639 |
| POSITIVE REGULATION OF SKELETAL MUSCLE TISSUE DEVELOPMENT                          | 24   | 0.245947798  | 0.147970084 |
| MYELOID LEUKOCYTE MIGRATION                                                        | 79   | -0.018275763 | 0.842361225 |
| COLLAGEN FIBRIL ORGANIZATION                                                       | 34   | 0.315874773  | 0.026235676 |
| POSITIVE REGULATION OF NEURON DEATH                                                | 59   | 0.057171324  | 0.596215435 |
| RESPONSE TO ESTRADIOL                                                              | 133  | -0.021351543 | 0.763332814 |
| CORONARY VASCULATURE DEVELOPMENT                                                   | 33   | -0.068296655 | 0.626317966 |
| CARTILAGE DEVELOPMENT                                                              | 123  | 0.114962403  | 0.127406867 |
| REGULATION OF TUMOR NECROSIS FACTOR SUPERFAMILY CYTOKINE PRODUCTION                | 86   | -0.025898543 | 0.768384931 |
| NEURON PROJECTION EXTENSION                                                        | 47   | 0.003481194  | 0.976778771 |
| REGULATION OF CARDIAC MUSCLE TISSUE DEVELOPMENT                                    | 45   | 0.092863888  | 0.453766734 |
| NEGATIVE REGULATION OF CYCLIC NUCLEOTIDE METABOLIC PROCESS                         | 32   | -0.047724692 | 0.738685769 |
| PYRIMIDINE NUCLEOTIDE BIOSYNTHETIC PROCESS                                         | 28   | -0.223873072 | 0.121616865 |
| RESPONSE TO MUSCLE STRETCH                                                         | 15   | -0.1593907   | 0.428835949 |
| NEGATIVE REGULATION OF OLIGODENDROCYTE DIFFERENTIATION                             | 12   | -0.313280324 | 0.134407355 |
| REGULATION OF PHOSPHATIDYLINOSITOL 3 KINASE SIGNALING                              | 125  | 0.131995811  | 0.07786106  |
| RESPONSE TO COLD                                                                   | 37   | -0.028054617 | 0.833878895 |
| NEGATIVE REGULATION OF SODIUM ION TRANSPORT                                        | 11   | 0.202057337  | 0.42679625  |
| CELLULAR RESPONSE TO INTERLEUKIN 1                                                 | 72   | -0.01568783  | 0.870587078 |
| CIRCULATORY SYSTEM PROCESS                                                         | 298  | 0.029875621  | 0.534864775 |
| REGULATION OF VASODILATION                                                         | 38   | 0.083682151  | 0.534313744 |
| REGULATION OF TRIGLYCERIDE METABOLIC PROCESS                                       | 29   | 0.093108534  | 0.546412783 |
| NEGATIVE REGULATION OF GLYCOPROTEIN BIOSYNTHETIC PROCESS                           | 11   | 0.22828217   | 0.365980953 |
| RESPONSE TO COCAINE                                                                | 39   | 0.047651687  | 0.718805592 |
| CELL CHEMOTAXIS                                                                    | 138  | 0.046408087  | 0.51068099  |
| NEGATIVE REGULATION OF INTRINSIC APOPTOTIC SIGNALING PATHWAY BY P53 CLASS MEDIATOR | 18   | 0.064005836  | 0.742844399 |
| RIBONUCLEOTIDE CATABOLIC PROCESS                                                   | 27   | 0.12255438   | 0.444035376 |
| POSITIVE REGULATION OF MITOTIC SISTER CHROMATID SEPARATION                         | 13   | -0.198682663 | 0.349111363 |
| DNA TEMPLATED TRANSCRIPTION TERMINATION                                            | 99   | -0.137710153 | 0.082521409 |
| NEGATIVE REGULATION OF INTERLEUKIN 1 PRODUCTION                                    | 10   | -0.20880465  | 0.392523823 |
| POSITIVE REGULATION OF CATION CHANNEL ACTIVITY                                     | 29   | -0.497554192 | 4.64E-05    |
| REGULATION OF PROSTAGLANDIN SECRETION                                              | 11   | -0.05959702  | 0.806152017 |
| REGULATION OF Podosome Assembly                                                    | 11   | -0.403116969 | 0.064941081 |
| REGULATION OF CELLULAR SENESCENCE                                                  | 26   | 0.064432333  | 0.691832975 |
| CARDIAC LEFT VENTRICLE MORPHOGENESIS                                               | 10   | 0.352603303  | 0.162050587 |
| NEGATIVE REGULATION OF STRIATED MUSCLE CELL DIFFERENTIATION                        | 22   | 0.241785529  | 0.171229868 |
| RESPONSE TO AMINE                                                                  | 40   | -0.14664673  | 0.237122497 |
| REGULATION OF ORGANIC ACID TRANSPORT                                               | 44   | 0.189357697  | 0.131011459 |
| REGULATION OF DNA DEPENDENT DNA REPLICATION                                        | 39   | -0.064332527 | 0.618307039 |
| NEGATIVE REGULATION OF POTASSIUM ION TRANSMEMBRANE TRANSPORTER ACTIVITY            | 13   | -0.12814282  | 0.561507968 |
| PROTEIN HOMOTETRAMERIZATION                                                        | 53   | -0.04933247  | 0.657397847 |
| IMMUNE SYSTEM PROCESS                                                              | 1595 | -0.022258833 | 0.302250156 |
| HEART TRABECULA MORPHOGENESIS                                                      | 24   | 0.113950952  | 0.504919499 |
| RESPIRATORY CHAIN COMPLEX IV ASSEMBLY                                              | 17   | -0.118291727 | 0.53792613  |
| VESICLE LOCALIZATION                                                               | 199  | -0.034912826 | 0.546631369 |
| NITRIC OXIDE METABOLIC PROCESS                                                     | 14   | 0.210649951  | 0.33955216  |
| POSITIVE REGULATION OF LEUKOCYTE APOPTOTIC PROCESS                                 | 23   | -0.269991376 | 0.08300374  |
| POSITIVE REGULATION OF CELL FATE COMMITMENT                                        | 9    | 0.42780214   | 0.092507039 |
| FOREBRAIN MORPHOGENESIS                                                            | 11   | 0.057063586  | 0.818901973 |
| TELOMERE CAPPING                                                                   | 28   | 0.080149202  | 0.609548678 |
| PROSTATE GLAND MORPHOGENESIS                                                       | 21   | 0.012597626  | 0.943926992 |
| NEGATIVE REGULATION OF AXON EXTENSION                                              | 37   | 0.153684039  | 0.26352701  |
| POSITIVE REGULATION OF TYPE I INTERFERON PRODUCTION                                | 66   | -0.041739032 | 0.67622495  |
| REGULATION OF STRESS ACTIVATED PROTEIN KINASE SIGNALING CASCADE                    | 176  | -0.01896102  | 0.75885356  |

|                                                                                 |     |              |             |
|---------------------------------------------------------------------------------|-----|--------------|-------------|
| MYELOID CELL DEVELOPMENT                                                        | 40  | -0.251979333 | 0.035622615 |
| NEGATIVE REGULATION OF KINASE ACTIVITY                                          | 225 | -0.146090584 | 0.005799825 |
| REGULATION OF MITOCHONDRIAL MEMBRANE PERMEABILITY INVOLVED IN APOPTOTIC PROCESS | 22  | 0.016729834  | 0.92389823  |
| INTRACELLULAR PROTEIN TRANSPORT                                                 | 714 | -0.069332115 | 0.024966552 |
| REGULATION OF HISTONE DEACETYLATION                                             | 22  | -0.217241006 | 0.180180152 |
| REGULATION OF PHOSPHATASE ACTIVITY                                              | 114 | 0.067328712  | 0.387346659 |
| NEUROTRANSMITTER UPTAKE                                                         | 13  | -0.390143292 | 0.041573273 |
| MICROTUBULE ANCHORING                                                           | 16  | -0.005483894 | 0.978592908 |
| CELL DIVISION                                                                   | 432 | -0.052890052 | 0.180288165 |
| REGULATION OF MRNA CATABOLIC PROCESS                                            | 24  | -0.055118971 | 0.738160357 |
| INTERMEDIATE FILAMENT ORGANIZATION                                              | 17  | -0.036896538 | 0.851245877 |
| REGULATION OF INTERLEUKIN 10 PRODUCTION                                         | 37  | 0.205311092  | 0.135647552 |
| SODIUM ION EXPORT                                                               | 10  | 0.130691927  | 0.620305623 |
| NEGATIVE REGULATION OF CELL DIVISION                                            | 54  | -0.232323557 | 0.026437488 |
| CELLULAR RESPONSE TO UV                                                         | 63  | -0.224961396 | 0.018668774 |
| REGULATION OF NUCLEAR DIVISION                                                  | 149 | -0.05467995  | 0.410803032 |
| RESPONSE TO ACID CHEMICAL                                                       | 278 | -0.008940851 | 0.856450807 |
| RESPONSE TO PROSTAGLANDIN E                                                     | 23  | 0.440578188  | 0.00603263  |
| NEGATIVE REGULATION OF RESPONSE TO REACTIVE OXYGEN SPECIES                      | 18  | -0.053599873 | 0.778431456 |
| POSITIVE REGULATION OF EPITHELIAL TO MESENCHYMAL TRANSITION                     | 31  | 0.10813811   | 0.470589994 |
| RESPONSE TO STEROID HORMONE                                                     | 423 | 0.041476062  | 0.307784968 |
| POSITIVE REGULATION OF RNA SPLICING                                             | 24  | -0.154872165 | 0.332851022 |
| RESPONSE TO IMMOBILIZATION STRESS                                               | 18  | -0.042820517 | 0.822512013 |
| RESPONSE TO INTERLEUKIN 4                                                       | 29  | 0.129519012  | 0.402235275 |
| POSITIVE REGULATION OF KERATINOCYTE DIFFERENTIATION                             | 12  | -0.044130214 | 0.850261422 |
| CARDIAC CHAMBER MORPHOGENESIS                                                   | 91  | 0.142617374  | 0.104113537 |
| REGULATION OF CARTILAGE DEVELOPMENT                                             | 54  | -0.110253236 | 0.307773434 |
| POSITIVE REGULATION OF INTERLEUKIN 8 PRODUCTION                                 | 35  | -0.002705146 | 0.984400154 |
| SEROTONIN METABOLIC PROCESS                                                     | 10  | -0.07177102  | 0.777596975 |
| REGULATION OF DEFENSE RESPONSE TO VIRUS                                         | 167 | -0.114853616 | 0.063020353 |
| RESPONSE TO PEPTIDE                                                             | 350 | 0.022510334  | 0.612477593 |
| REGULATION OF ENDOTHELIAL CELL APOPTOTIC PROCESS                                | 36  | -0.106356091 | 0.422784591 |
| DNA DEPENDENT DNA REPLICATION                                                   | 96  | -0.094123897 | 0.249466177 |
| REGULATION OF SKELETAL MUSCLE CELL DIFFERENTIATION                              | 13  | 0.326194038  | 0.161390734 |
| POSITIVE REGULATION OF CELLULAR PROTEIN CATABOLIC PROCESS                       | 180 | -0.101299533 | 0.090590298 |
| STEROL HOMEOSTASIS                                                              | 45  | 0.271539319  | 0.02935268  |
| EMBRYONIC AXIS SPECIFICATION                                                    | 27  | -0.101815099 | 0.507060381 |
| REGULATION OF LEUKOCYTE APOPTOTIC PROCESS                                       | 68  | -0.143907239 | 0.131911452 |
| POSITIVE REGULATION OF INTERLEUKIN 1 BETA PRODUCTION                            | 23  | 0.087652387  | 0.612219382 |
| CELLULAR RESPONSE TO LIPID                                                      | 403 | 0.082388903  | 0.049330745 |
| SECRETION BY CELL                                                               | 399 | -0.030946688 | 0.452858425 |
| LIPOPROTEIN METABOLIC PROCESS                                                   | 105 | -0.031275761 | 0.6941518   |
| DISRUPTION OF CELLS OF OTHER ORGANISM INVOLVED IN SYMBIOTIC INTERACTION         | 10  | 0.20401084   | 0.441954992 |
| IRON COORDINATION ENTITY TRANSPORT                                              | 11  | 0.235775506  | 0.346950871 |
| PHOSPHATIDYLCHOLINE BIOSYNTHETIC PROCESS                                        | 21  | -0.194330772 | 0.247566316 |
| KERATAN SULFATE METABOLIC PROCESS                                               | 29  | -0.428391582 | 0.001035527 |
| REGULATION OF COAGULATION                                                       | 77  | -0.016085634 | 0.862862029 |
| MEMBRANE BIOGENESIS                                                             | 28  | -0.259437654 | 0.065075525 |
| REGULATION OF EPIDERMIS DEVELOPMENT                                             | 55  | 0.15768443   | 0.161763097 |
| FORMATION OF PRIMARY GERM LAYER                                                 | 100 | -0.171141287 | 0.029183413 |
| NEGATIVE REGULATION OF MUSCLE CELL DIFFERENTIATION                              | 45  | 0.074722444  | 0.546128512 |
| ENERGY RESERVE METABOLIC PROCESS                                                | 64  | 0.053395393  | 0.606152248 |
| GLYCOLIPID BIOSYNTHETIC PROCESS                                                 | 53  | -0.134667074 | 0.213411166 |
| REGULATION OF ACTIN NUCLEATION                                                  | 26  | 0.092200154  | 0.572063723 |
| REGULATION OF DENDRITIC CELL DIFFERENTIATION                                    | 9   | -0.370952732 | 0.102906214 |
| EPITHELIAL CELL DEVELOPMENT                                                     | 165 | -0.027914473 | 0.660941914 |
| AMIDE TRANSPORT                                                                 | 68  | 0.014731723  | 0.882564347 |
| REGULATION OF INTERFERON GAMMA PRODUCTION                                       | 76  | 0.201274985  | 0.034927171 |
| NEGATIVE REGULATION OF LIPID METABOLIC PROCESS                                  | 65  | 0.22600597   | 0.028283287 |
| PROTEIN LOCALIZATION TO KINETOCHORE                                             | 11  | -0.320255665 | 0.145342597 |
| NEGATIVE REGULATION OF FAT CELL DIFFERENTIATION                                 | 38  | 0.026652939  | 0.841865411 |
| PHOTOPERIODISM                                                                  | 21  | -0.099342667 | 0.568819907 |
| ALPHA AMINO ACID BIOSYNTHETIC PROCESS                                           | 68  | -0.096317421 | 0.32056351  |
| MESENCHYMAL TO EPITHELIAL TRANSITION                                            | 14  | 0.056989506  | 0.796552815 |

|                                                                                  |      |              |             |
|----------------------------------------------------------------------------------|------|--------------|-------------|
| ESTABLISHMENT OF ENDOTHELIAL INTESTINAL BARRIER                                  | 11   | -0.051563852 | 0.832462213 |
| SALIVARY GLAND DEVELOPMENT                                                       | 29   | 0.20294909   | 0.191305765 |
| CELL CYCLE DNA REPLICATION                                                       | 10   | 0.261673703  | 0.315119418 |
| NEGATIVE REGULATION OF TRANSCRIPTION ELONGATION FROM RNA POLYMERASE II PROMOTER  | 10   | -0.19199999  | 0.429806742 |
| CHROMOSOME CONDENSATION                                                          | 27   | -0.230621128 | 0.114754416 |
| POSITIVE REGULATION OF RESPONSE TO STIMULUS                                      | 1621 | -0.015676214 | 0.464830608 |
| REGULATION OF MONOOXYGENASE ACTIVITY                                             | 52   | 0.267614373  | 0.020106261 |
| SENSORY PERCEPTION OF MECHANICAL STIMULUS                                        | 120  | -0.016016343 | 0.83024624  |
| ESTABLISHMENT OF EPITHELIAL CELL POLARITY                                        | 20   | -0.362840873 | 0.024913385 |
| TOLL LIKE RECEPTOR 9 SIGNALING PATHWAY                                           | 12   | 0.101470934  | 0.672220901 |
| EMBRYONIC DIGIT MORPHOGENESIS                                                    | 55   | -0.133072765 | 0.212178856 |
| REGULATION OF CANONICAL WNT SIGNALING PATHWAY                                    | 213  | 0.088388438  | 0.122927788 |
| NITROGEN CYCLE METABOLIC PROCESS                                                 | 13   | -0.033967189 | 0.880084894 |
| T CELL ACTIVATION INVOLVED IN IMMUNE RESPONSE                                    | 45   | 0.023403337  | 0.848753388 |
| NEGATIVE REGULATION OF LEUKOCYTE PROLIFERATION                                   | 57   | -0.120194705 | 0.253889611 |
| NECROPTOTIC PROCESS                                                              | 21   | 0.004982251  | 0.977772776 |
| NEGATIVE REGULATION OF GLIOGENESIS                                               | 35   | -0.062415519 | 0.64697187  |
| DENDRITIC CELL CHEMOTAXIS                                                        | 15   | 0.08694636   | 0.684569696 |
| REGULATION OF ANTIGEN PROCESSING AND PRESENTATION OF PEPTIDE ANTIGEN             | 10   | -0.069832028 | 0.783307692 |
| REGULATION OF NEURONAL SYNAPTIC PLASTICITY                                       | 41   | 0.111534528  | 0.391411726 |
| REGULATION OF PHOSPHOLIPASE C ACTIVITY                                           | 30   | -0.063754441 | 0.665068292 |
| REGULATION OF DEVELOPMENTAL GROWTH                                               | 263  | 0.047613298  | 0.353811004 |
| MEMBRANE DISASSEMBLY                                                             | 47   | -0.478187441 | 5.34E-06    |
| REGULATION OF SYNAPTIC TRANSMISSION GLUTAMATERGIC                                | 41   | -0.08149794  | 0.515167257 |
| ACTIVATION OF PHOSPHOLIPASE C ACTIVITY                                           | 18   | 0.023039484  | 0.905391338 |
| NEGATIVE REGULATION OF BIOMINERAL TISSUE DEVELOPMENT                             | 16   | -0.123787664 | 0.53108898  |
| NEGATIVE REGULATION OF BONE RESORPTION                                           | 9    | -0.301856554 | 0.22889737  |
| CELLULAR RESPONSE TO EXTERNAL STIMULUS                                           | 243  | -0.04125102  | 0.431269665 |
| NADP METABOLIC PROCESS                                                           | 26   | -0.153814678 | 0.316431036 |
| POSITIVE REGULATION OF MRNA PROCESSING                                           | 31   | -0.069119062 | 0.632659511 |
| EPITHELIAL TUBE BRANCHING INVOLVED IN LUNG MORPHOGENESIS                         | 24   | 0.34769071   | 0.04280732  |
| DETECTION OF MECHANICAL STIMULUS INVOLVED IN SENSORY PERCEPTION                  | 21   | 0.150105831  | 0.410305415 |
| REGULATION OF CELL CELL ADHESION MEDIATED BY CADHERIN                            | 11   | 0.217386191  | 0.382798294 |
| METANEPHRIC EPITHELIUM DEVELOPMENT                                               | 16   | 0.119395163  | 0.565485029 |
| REGULATION OF SMOOTH MUSCLE CELL DIFFERENTIATION                                 | 18   | -0.081473751 | 0.666834931 |
| FATTY ACID BETA OXIDATION                                                        | 46   | 0.128944435  | 0.293585621 |
| ACTIN FILAMENT BASED PROCESS                                                     | 388  | 0.020530059  | 0.626991334 |
| RESPONSE TO FLUID SHEAR STRESS                                                   | 31   | 0.067041059  | 0.652961141 |
| NEGATIVE REGULATION OF MUSCLE CONTRACTION                                        | 19   | 0.023944597  | 0.899024516 |
| TRANSITION METAL ION TRANSPORT                                                   | 93   | 0.050924548  | 0.553311655 |
| POSITIVE REGULATION OF MUSCLE CELL DIFFERENTIATION                               | 75   | -0.042586831 | 0.649625268 |
| REGULATION OF ADAPTIVE IMMUNE RESPONSE                                           | 102  | -0.026593549 | 0.742015436 |
| PHOSPHATIDYLINOSITOL BIOSYNTHETIC PROCESS                                        | 110  | -0.042543692 | 0.583027963 |
| POSITIVE REGULATION OF CELL COMMUNICATION                                        | 1331 | -0.028782389 | 0.21789096  |
| POSITIVE REGULATION OF LIPID KINASE ACTIVITY                                     | 30   | -0.300820071 | 0.025313838 |
| RESPONSE TO CORTICOSTEROID                                                       | 152  | 0.012067648  | 0.856756376 |
| POSITIVE REGULATION OF LEUKOCYTE DEGRANULATION                                   | 15   | -0.026352622 | 0.900140118 |
| SODIUM ION TRANSMEMBRANE TRANSPORT                                               | 65   | 0.071026118  | 0.490131934 |
| PROTEIN UBIQUITINATION INVOLVED IN UBIQUITIN DEPENDENT PROTEIN CATABOLIC PROCESS | 128  | 0.074980529  | 0.308858742 |
| NEGATIVE REGULATION OF BLOOD VESSEL ENDOTHELIAL CELL MIGRATION                   | 22   | -0.068461666 | 0.689655526 |
| CELL PROJECTION ASSEMBLY                                                         | 235  | -0.013522329 | 0.80091439  |
| REGULATION OF PROTEIN IMPORT INTO NUCLEUS TRANSLOCATION                          | 20   | -0.233905799 | 0.168601364 |
| GLUCOCORTICOID METABOLIC PROCESS                                                 | 7    | 0.054058652  | 0.862524916 |
| PROTEIN MATURATION                                                               | 229  | -0.02516007  | 0.642317208 |
| SKELETAL MUSCLE ADAPTATION                                                       | 8    | -0.011098351 | 0.969321373 |
| PROTEIN N LINKED GLYCOSYLATION                                                   | 70   | -0.167921711 | 0.073190816 |
| ANAPHASE PROMOTING COMPLEX DEPENDENT CATABOLIC PROCESS                           | 73   | -0.249957361 | 0.004879699 |
| HINDLIMB MORPHOGENESIS                                                           | 31   | 0.174500465  | 0.244032939 |
| ESTABLISHMENT OR MAINTENANCE OF EPITHELIAL CELL APICAL BASAL POLARITY            | 28   | -0.080309177 | 0.596886639 |
| LOOP OF HENLE DEVELOPMENT                                                        | 8    | 0.374483504  | 0.191404027 |
| VESICLE ORGANIZATION                                                             | 249  | 0.013882561  | 0.791147165 |
| KERATINOCYTE PROLIFERATION                                                       | 10   | 0.636107569  | 0.002566829 |

|                                                                                     |      |              |             |
|-------------------------------------------------------------------------------------|------|--------------|-------------|
| MACROPHAGE ACTIVATION INVOLVED IN IMMUNE RESPONSE                                   | 10   | 0.215136659  | 0.408912749 |
| INDOLALKYLAMINE METABOLIC PROCESS                                                   | 15   | 0.277558698  | 0.186686951 |
| POSITIVE REGULATION OF BINDING                                                      | 121  | 0.050953106  | 0.499212384 |
| SMOOTH MUSCLE CELL DIFFERENTIATION                                                  | 28   | 0.038669531  | 0.80415497  |
| MALE GENITALIA DEVELOPMENT                                                          | 17   | 0.005485844  | 0.977979376 |
| REGULATION OF HYDROLASE ACTIVITY                                                    | 1123 | 0.001975755  | 0.937953021 |
| ENDOCARDIAL CUSHION DEVELOPMENT                                                     | 31   | 0.160144479  | 0.284473497 |
| NEGATIVE REGULATION OF ERBB SIGNALING PATHWAY                                       | 42   | -0.029551079 | 0.813969585 |
| RESPONSE TO DIETARY EXCESS                                                          | 17   | 0.169720265  | 0.399269086 |
| REGULATION OF MEIOTIC NUCLEAR DIVISION                                              | 23   | 0.20596454   | 0.234785347 |
| BRANCH ELONGATION OF AN EPITHELIUM                                                  | 17   | -0.318176448 | 0.070933242 |
| POSITIVE REGULATION OF CELLULAR AMIDE METABOLIC PROCESS                             | 102  | 0.045938072  | 0.575431785 |
| POSITIVE REGULATION OF VACUOLE ORGANIZATION                                         | 12   | -0.423637094 | 0.032348091 |
| NEGATIVE REGULATION OF PLATELET ACTIVATION                                          | 15   | -0.029366734 | 0.888720399 |
| GLUTAMINE FAMILY AMINO ACID CATABOLIC PROCESS                                       | 22   | -0.136282537 | 0.415564763 |
| EMBRYONIC SKELETAL SYSTEM DEVELOPMENT                                               | 114  | 0.08166032   | 0.295096788 |
| NEURON MATURATION                                                                   | 23   | -0.265279496 | 0.08930718  |
| THYMIC T CELL SELECTION                                                             | 17   | 0.056303762  | 0.779143135 |
| CELLULAR RESPONSE TO BIOTIC STIMULUS                                                | 145  | 0.056473707  | 0.413010559 |
| COENZYME A METABOLIC PROCESS                                                        | 16   | 0.036562135  | 0.859169208 |
| PROTEIN LOCALIZATION TO CILIUM                                                      | 22   | 0.139318963  | 0.433003514 |
| RNA STABILIZATION                                                                   | 28   | 0.106603061  | 0.499078355 |
| ACTIN MYOSIN FILAMENT SLIDING                                                       | 28   | -0.029869667 | 0.845854871 |
| REGULATION OF CELL MORPHOGENESIS INVOLVED IN DIFFERENTIATION                        | 306  | 0.068344283  | 0.153152941 |
| REGULATION OF PROTEIN HOMODIMERIZATION ACTIVITY                                     | 20   | 0.006006334  | 0.973855855 |
| REGULATION OF HETEROTYPIC CELL CELL ADHESION                                        | 16   | 0.097963367  | 0.637109939 |
| POSITIVE REGULATION OF REACTIVE OXYGEN SPECIES BIOSYNTHETIC PROCESS                 | 43   | 0.124687035  | 0.326655438 |
| ALPHA AMINO ACID METABOLIC PROCESS                                                  | 199  | -0.024108729 | 0.67797611  |
| MITOCHONDRIAL DNA METABOLIC PROCESS                                                 | 13   | -0.076372041 | 0.731786998 |
| CGMP METABOLIC PROCESS                                                              | 16   | 0.120880763  | 0.561170836 |
| ADULT BEHAVIOR                                                                      | 112  | 0.059983017  | 0.444340499 |
| RETINAL GANGLION CELL AXON GUIDANCE                                                 | 15   | 0.061019115  | 0.775284755 |
| POSITIVE REGULATION OF MEMBRANE INVAGINATION                                        | 10   | 0.408869866  | 0.091341241 |
| SPINDLE LOCALIZATION                                                                | 37   | -0.020827135 | 0.876508278 |
| HYDROGEN PEROXIDE CATABOLIC PROCESS                                                 | 12   | -0.113319354 | 0.620644089 |
| CELLULAR RESPONSE TO ORGANIC CYCLIC COMPOUND                                        | 423  | 0.052110426  | 0.200847643 |
| POSITIVE REGULATION OF CYTOKINE PRODUCTION INVOLVED IN IMMUNE RESPONSE              | 28   | 0.142257765  | 0.365297174 |
| REGULATION OF PROTEIN SUMOYLATION                                                   | 17   | -0.189896806 | 0.30845852  |
| RESPONSE TO ENDOPLASMIC RETICULUM STRESS                                            | 217  | -0.109587607 | 0.044166889 |
| CELLULAR RESPONSE TO LIGHT STIMULUS                                                 | 78   | -0.180923046 | 0.039111238 |
| POSITIVE REGULATION BY HOST OF VIRAL TRANSCRIPTION                                  | 12   | -0.091516506 | 0.691293897 |
| NEGATIVE REGULATION OF STEM CELL DIFFERENTIATION                                    | 36   | 0.079472924  | 0.565506156 |
| NEGATIVE REGULATION OF PRODUCTION OF MOLECULAR MEDIATOR OF IMMUNE RESPONSE          | 23   | 0.123613225  | 0.476742572 |
| SPHINGOLIPID MEDIATED SIGNALING PATHWAY                                             | 9    | 0.037585596  | 0.891185274 |
| SYNAPTIC VESICLE CYTOSKELETAL TRANSPORT                                             | 15   | -0.059714115 | 0.774453728 |
| LUNG CELL DIFFERENTIATION                                                           | 23   | 0.214051662  | 0.21950511  |
| PLATELET ACTIVATION                                                                 | 130  | -0.073263587 | 0.300634716 |
| CYTOSKELETON ORGANIZATION                                                           | 733  | 0.009745976  | 0.753491365 |
| NUCLEOTIDE BINDING DOMAIN LEUCINE RICH REPEAT CONTAINING RECEPTOR SIGNALING PATHWAY | 26   | -0.093067078 | 0.553658182 |
| TRANSCRIPTION COUPLED NUCLEOTIDE EXCISION REPAIR                                    | 69   | 0.088395491  | 0.377533114 |
| MEMBRANE DEPOLARIZATION DURING ACTION POTENTIAL                                     | 32   | -0.148201292 | 0.28492792  |
| MATURATION OF SSU RRNA                                                              | 41   | -0.090894548 | 0.466871063 |
| BETA AMYLOID METABOLIC PROCESS                                                      | 11   | -0.262392214 | 0.250838703 |
| RESPONSE TO WOUNDING                                                                | 487  | -0.049137486 | 0.187496754 |
| NON CANONICAL WNT SIGNALING PATHWAY                                                 | 129  | -0.126304227 | 0.071057453 |
| RENAL SYSTEM PROCESS INVOLVED IN REGULATION OF BLOOD VOLUME                         | 14   | -0.165766341 | 0.424354998 |
| NEGATIVE REGULATION OF LEUKOCYTE MEDIATED IMMUNITY                                  | 40   | -0.132128544 | 0.289872738 |
| POSITIVE REGULATION OF CREB TRANSCRIPTION FACTOR ACTIVITY                           | 12   | -0.021106407 | 0.928461362 |
| NEGATIVE REGULATION OF CELL GROWTH                                                  | 155  | 0.099568112  | 0.138215446 |
| MODIFIED AMINO ACID TRANSPORT                                                       | 19   | -0.12783972  | 0.482276562 |
| CGMP BIOSYNTHETIC PROCESS                                                           | 9    | 0.341104635  | 0.195449332 |
| PROTEIN SECRETION                                                                   | 96   | -0.041837478 | 0.613965495 |
| ALTERNATIVE MRNA SPLICING VIA SPLICEOSOME                                           | 11   | -0.522603844 | 0.016987466 |

|                                                                    |      |              |             |
|--------------------------------------------------------------------|------|--------------|-------------|
| ASSOCIATIVE LEARNING                                               | 62   | -0.085238437 | 0.402810179 |
| SNORNA METABOLIC PROCESS                                           | 9    | -0.301971015 | 0.210888279 |
| NEGATIVE REGULATION OF CELLULAR CATABOLIC PROCESS                  | 146  | -0.000989645 | 0.988391025 |
| REGULATION OF RESPONSE TO EXTRACELLULAR STIMULUS                   | 157  | -0.011669353 | 0.858516897 |
| COFACTOR TRANSPORT                                                 | 23   | 0.050724533  | 0.768449121 |
| POSITIVE REGULATION OF FAT CELL DIFFERENTIATION                    | 47   | 0.00479218   | 0.968046692 |
| NEGATIVE REGULATION OF PROTEIN POLYMERIZATION                      | 48   | 0.111294546  | 0.35397948  |
| EXOGENOUS DRUG CATABOLIC PROCESS                                   | 6    | 0.010636771  | 0.974652915 |
| NEGATIVE REGULATION OF REACTIVE OXYGEN SPECIES METABOLIC PROCESS   | 38   | 0.179283268  | 0.184017713 |
| REGULATION OF PROTEIN DEACETYLATION                                | 31   | -0.225151628 | 0.097365655 |
| OTIC VESICLE DEVELOPMENT                                           | 11   | -0.093905475 | 0.696172895 |
| POSITIVE REGULATION OF DNA TEMPLATED TRANSCRIPTION INITIATION      | 21   | -0.214453236 | 0.200097754 |
| NEURON PROJECTION EXTENSION INVOLVED IN NEURON PROJECTION GUIDANCE | 10   | 0.079390607  | 0.762144143 |
| PHOSPHOLIPID DEPHOSPHORYLATION                                     | 31   | -0.033044512 | 0.820877202 |
| NEGATIVE REGULATION OF DNA REPAIR                                  | 14   | 0.241704096  | 0.284422521 |
| METAL ION TRANSPORT                                                | 453  | 0.087549802  | 0.027071267 |
| INSULIN SECRETION                                                  | 31   | 0.103002356  | 0.490315954 |
| POSITIVE REGULATION OF FIBROBLAST PROLIFERATION                    | 48   | 0.227921764  | 0.061152593 |
| PREASSEMBLY OF GPI ANCHOR IN ER MEMBRANE                           | 14   | -0.067400787 | 0.754001822 |
| NECROTIC CELL DEATH                                                | 28   | 0.098114435  | 0.532251432 |
| REGULATION OF MAST CELL ACTIVATION INVOLVED IN IMMUNE RESPONSE     | 27   | -0.253047505 | 0.082195796 |
| POSITIVE REGULATION OF CELLULAR AMINE METABOLIC PROCESS            | 10   | 0.079933776  | 0.76031951  |
| POSITIVE REGULATION OF INTRACELLULAR PROTEIN TRANSPORT             | 222  | -0.032148686 | 0.558265782 |
| REGULATION BY VIRUS OF VIRAL PROTEIN LEVELS IN HOST CELL           | 11   | -0.118362912 | 0.619791317 |
| CHROMOSOME LOCALIZATION                                            | 57   | 0.09725916   | 0.378313617 |
| REGULATION OF RESPIRATORY SYSTEM PROCESS                           | 14   | -0.263367099 | 0.183301536 |
| POSITIVE REGULATION OF ADENYLATE CYCLASE ACTIVITY                  | 34   | -0.038460511 | 0.78228633  |
| POSITIVE REGULATION OF NEURON DIFFERENTIATION                      | 271  | -0.005539173 | 0.911937348 |
| EMBRYONIC SKELETAL SYSTEM MORPHOGENESIS                            | 87   | 0.089492857  | 0.316118465 |
| ACTIVATION OF GTPASE ACTIVITY                                      | 65   | 0.132140472  | 0.202183949 |
| INOSITOL PHOSPHATE METABOLIC PROCESS                               | 51   | 0.002901337  | 0.979839425 |
| T CELL HOMEOSTASIS                                                 | 28   | -0.186096296 | 0.204201512 |
| REGULATION OF RECEPTOR ACTIVITY                                    | 98   | -0.047092451 | 0.565799567 |
| HISTONE METHYLATION                                                | 72   | -0.181202419 | 0.048954797 |
| CELLULAR RESPONSE TO FLUID SHEAR STRESS                            | 18   | -0.140831212 | 0.447861448 |
| POSITIVE REGULATION OF TRANSPORTER ACTIVITY                        | 63   | -0.171634736 | 0.081869474 |
| POSITIVE REGULATION OF TRANSCRIPTION FACTOR IMPORT INTO NUCLEUS    | 46   | 0.172528377  | 0.160442822 |
| ALPHA BETA T CELL DIFFERENTIATION                                  | 38   | 0.076194795  | 0.571818064 |
| ESTABLISHMENT OF PROTEIN LOCALIZATION TO CHROMOSOME                | 12   | -0.099540486 | 0.664233053 |
| PEPTIDE CROSS LINKING                                              | 29   | 0.18711701   | 0.224136715 |
| PEPTIDYL SERINE MODIFICATION                                       | 140  | 0.100433497  | 0.155395067 |
| CELLULAR RESPONSE TO EXTRACELLULAR STIMULUS                        | 177  | -0.03248848  | 0.596717242 |
| ROUNDOABOUT SIGNALING PATHWAY                                      | 10   | 0.347813003  | 0.170984743 |
| ESTABLISHMENT OF PROTEIN LOCALIZATION                              | 1281 | -0.052341755 | 0.027008957 |
| NEGATIVE REGULATION OF RESPONSE TO DNA DAMAGE STIMULUS             | 49   | 0.03646714   | 0.757093861 |
| GLUTAMATE METABOLIC PROCESS                                        | 26   | -0.064430813 | 0.683276689 |
| SPHINGOMYELIN METABOLIC PROCESS                                    | 12   | 0.395998942  | 0.081865106 |
| TRNA METABOLIC PROCESS                                             | 162  | -0.182764018 | 0.002912557 |
| NEGATIVE REGULATION OF ATPASE ACTIVITY                             | 12   | 0.057162895  | 0.810862707 |
| POSITIVE REGULATION OF LOCOMOTION                                  | 381  | 0.005166323  | 0.903230285 |
| REGULATION OF DENDRITE MORPHOGENESIS                               | 65   | -0.076550068 | 0.443047837 |
| CELLULAR RESPONSE TO LITHIUM ION                                   | 14   | -0.099839572 | 0.638952109 |
| MAMMARY GLAND EPITHELIUM DEVELOPMENT                               | 48   | 0.034099796  | 0.774577038 |
| CELLULAR RESPONSE TO PROSTAGLANDIN STIMULUS                        | 22   | 0.300142771  | 0.085013551 |
| REGULATION OF MYELOID CELL APOPTOTIC PROCESS                       | 22   | -0.12452985  | 0.460274242 |
| NEGATIVE REGULATION OF VIRAL PROCESS                               | 79   | 0.074123191  | 0.427847169 |
| ERYTHROCYTE HOMEOSTASIS                                            | 65   | -0.300841839 | 0.001409376 |
| RESPONSE TO HEAT                                                   | 72   | -0.146951894 | 0.113975072 |
| NOTCH RECEPTOR PROCESSING                                          | 15   | -0.550732574 | 0.002617049 |
| CELLULAR RESPONSE TO CADMIUM ION                                   | 14   | -0.229515937 | 0.252801559 |
| SUCKLING BEHAVIOR                                                  | 11   | -0.418489469 | 0.044267869 |
| POSITIVE REGULATION OF KIDNEY DEVELOPMENT                          | 37   | -0.06577008  | 0.61958863  |
| REGULATION OF MITOTIC SPINDLE CHECKPOINT                           | 11   | 0.093813402  | 0.708192385 |
| I KAPPAB KINASE NF KAPPAB SIGNALING                                | 65   | -0.021747094 | 0.829825525 |
| REGULATION OF NON CANONICAL WNT SIGNALING PATHWAY                  | 17   | 0.443581184  | 0.026061462 |

|                                                                                              |     |              |             |
|----------------------------------------------------------------------------------------------|-----|--------------|-------------|
| REGULATION OF KINASE ACTIVITY                                                                | 694 | -0.083631606 | 0.007418369 |
| CHROMOSOME LOCALIZATION TO NUCLEAR ENVELOPE INVOLVED IN<br>HOMOLOGOUS CHROMOSOME SEGREGATION | 9   | 0.120244434  | 0.664597638 |
| NEGATIVE REGULATION OF DNA RECOMBINATION                                                     | 15  | -0.201549296 | 0.31510406  |
| POSITIVE REGULATION OF LYMPHOCYTE MIGRATION                                                  | 24  | -0.274783154 | 0.073431671 |
| NEGATIVE REGULATION OF CELLULAR RESPONSE TO INSULIN STIMULUS                                 | 28  | -0.067099088 | 0.659195203 |
| POSITIVE REGULATION OF CELLULAR EXTRAVASATION                                                | 11  | 0.348831458  | 0.147063457 |
| MYELOID LEUKOCYTE DIFFERENTIATION                                                            | 87  | 0.041229448  | 0.641987001 |
| PEROXISOME ORGANIZATION                                                                      | 28  | 0.030164551  | 0.846354593 |
| DNA STRAND ELONGATION INVOLVED IN DNA REPLICATION                                            | 25  | 0.046078772  | 0.780308443 |
| CELLULAR MODIFIED AMINO ACID CATABOLIC PROCESS                                               | 15  | -0.165722433 | 0.407866044 |
| SINGLE ORGANISM CELL ADHESION                                                                | 390 | -0.024503572 | 0.557240102 |
| POLYOL METABOLIC PROCESS                                                                     | 84  | -0.010038598 | 0.910500951 |
| POSITIVE REGULATION OF TRANSCRIPTION INITIATION FROM RNA<br>POLYMERASE II PROMOTER           | 14  | -0.332739394 | 0.087265098 |
| APICAL JUNCTION ASSEMBLY                                                                     | 35  | -0.203481888 | 0.118836265 |
| PYRIMIDINE RIBONUCLEOSIDE TRIPHOSPHATE METABOLIC PROCESS                                     | 14  | -0.53030794  | 0.003550498 |
| LYMPHOCYTE HOMEOSTASIS                                                                       | 42  | -0.154190827 | 0.204417605 |
| SERTOLI CELL DEVELOPMENT                                                                     | 13  | -0.011491108 | 0.959519536 |
| NEGATIVE REGULATION OF RNA SPLICING                                                          | 24  | -0.022300098 | 0.89331625  |
| CELL CYCLE PHASE TRANSITION                                                                  | 251 | -0.123570743 | 0.014473155 |
| TISSUE MORPHOGENESIS                                                                         | 466 | 0.006164613  | 0.872920916 |
| ENDOSOME TO LYSOSOME TRANSPORT                                                               | 38  | 0.251776268  | 0.068195244 |
| MRNA PROCESSING                                                                              | 405 | -0.110830916 | 0.005758316 |
| RESPONSE TO ANGIOTENSIN                                                                      | 14  | 0.225763728  | 0.305955574 |
| DENDRITIC SPINE DEVELOPMENT                                                                  | 15  | -0.043670333 | 0.834616763 |
| REGULATION OF PROTEIN OLIGOMERIZATION                                                        | 31  | 0.181828323  | 0.223609274 |
| HEME METABOLIC PROCESS                                                                       | 25  | -0.398023134 | 0.004977619 |
| SERINE FAMILY AMINO ACID BIOSYNTHETIC PROCESS                                                | 15  | -0.107843212 | 0.599709184 |
| CEREBELLAR PURKINJE CELL LAYER FORMATION                                                     | 9   | -0.20630215  | 0.423522539 |
| CELLULAR RESPONSE TO CARBOHYDRATE STIMULUS                                                   | 65  | -0.15512096  | 0.111174091 |
| INOSITOL PHOSPHATE CATABOLIC PROCESS                                                         | 11  | -0.252298424 | 0.260375958 |
| C21 STEROID HORMONE METABOLIC PROCESS                                                        | 18  | 0.013826195  | 0.943030611 |
| NEGATIVE REGULATION OF GLIAL CELL DIFFERENTIATION                                            | 24  | -0.022445743 | 0.892609972 |
| POSITIVE REGULATION OF SYNAPSE ASSEMBLY                                                      | 48  | 0.097976767  | 0.414355878 |
| TRANSMISSION OF NERVE IMPULSE                                                                | 39  | 0.247779712  | 0.061550809 |
| POSITIVE REGULATION OF VASCULATURE DEVELOPMENT                                               | 122 | 0.014731936  | 0.843426194 |
| POSITIVE REGULATION OF EPIDERMAL CELL DIFFERENTIATION                                        | 17  | 0.047593822  | 0.812238833 |
| MEMBRANE FUSION                                                                              | 133 | -0.016631092 | 0.814762242 |
| POSITIVE REGULATION OF TOR SIGNALING                                                         | 29  | -0.074240077 | 0.618767478 |
| POSITIVE REGULATION OF GLIAL CELL DIFFERENTIATION                                            | 27  | 0.196483996  | 0.225642672 |
| MALE SEX DETERMINATION                                                                       | 7   | 0.418604842  | 0.221675628 |
| TYPE B PANCREATIC CELL DEVELOPMENT                                                           | 12  | 0.051109948  | 0.830388677 |
| REGULATION OF SUPEROXIDE ANION GENERATION                                                    | 10  | 0.133334827  | 0.611884158 |
| ANTIGEN RECEPTOR MEDIATED SIGNALING PATHWAY                                                  | 148 | -0.11851316  | 0.070503672 |
| POSITIVE REGULATION OF MITOTIC CELL CYCLE                                                    | 115 | -0.079540367 | 0.289598139 |
| LYMPHOCYTE COSTIMULATION                                                                     | 60  | -0.1760186   | 0.081298498 |
| REGULATION OF SERINE TYPE PEPTIDASE ACTIVITY                                                 | 8   | 0.088211323  | 0.763362066 |
| NEGATIVE REGULATION OF STEROID METABOLIC PROCESS                                             | 19  | 0.431250987  | 0.015220128 |
| COFACTOR METABOLIC PROCESS                                                                   | 292 | -0.04268028  | 0.372690952 |
| BARBED END ACTIN FILAMENT CAPPING                                                            | 12  | 0.199625943  | 0.404516425 |
| CELL MIGRATION INVOLVED IN SPROUTING ANGIOGENESIS                                            | 14  | -0.122037234 | 0.566099591 |
| NEGATIVE REGULATION OF INTRACELLULAR ESTROGEN RECEPTOR<br>SIGNALING PATHWAY                  | 9   | 0.283357909  | 0.299499474 |
| REGULATION OF TYPE 2 IMMUNE RESPONSE                                                         | 23  | 0.132438379  | 0.444588365 |
| 3 UTR MEDIATED MRNA STABILIZATION                                                            | 11  | -0.271876197 | 0.229375741 |
| DRUG CATABOLIC PROCESS                                                                       | 8   | -0.188175805 | 0.488383254 |
| POSITIVE REGULATION OF RHO PROTEIN SIGNAL TRANSDUCTION                                       | 12  | -0.246906353 | 0.269495922 |
| PRIMITIVE STREAK FORMATION                                                                   | 11  | -0.321557485 | 0.150844967 |
| RESPONSE TO PHENYLPROPANOID                                                                  | 7   | 0.343061124  | 0.250609141 |
| REGULATION OF EPITHELIAL CELL MIGRATION                                                      | 151 | 0.043310334  | 0.520889232 |
| POSITIVE REGULATION OF NOTCH SIGNALING PATHWAY                                               | 29  | 0.109155538  | 0.480095019 |
| CELL DEATH                                                                                   | 893 | -0.012533521 | 0.656179555 |
| CELLULAR IRON ION HOMEOSTASIS                                                                | 37  | 0.021280852  | 0.874968391 |
| CONTRACTILE ACTIN FILAMENT BUNDLE ASSEMBLY                                                   | 11  | -0.402620584 | 0.05548418  |
| MACROMOLECULE DEACYLATION                                                                    | 63  | -0.003899179 | 0.969858129 |

|                                                                           |      |              |             |
|---------------------------------------------------------------------------|------|--------------|-------------|
| TRANSLATIONAL INITIATION                                                  | 143  | -0.18926351  | 0.003770268 |
| ACTIVATION OF NF KAPPAB INDUCING KINASE ACTIVITY                          | 16   | -0.018214459 | 0.928772729 |
| SYNAPTIC TRANSMISSION CHOLINERGIC                                         | 16   | 0.08790732   | 0.671532216 |
| NEGATIVE REGULATION OF CYTOKINE PRODUCTION INVOLVED IN IMMUNE RESPONSE    | 18   | 0.075331892  | 0.69982719  |
| REGULATION OF TOLL LIKE RECEPTOR 4 SIGNALING PATHWAY                      | 16   | -0.151044579 | 0.443740008 |
| POSITIVE REGULATION OF CELLULAR PROTEIN LOCALIZATION                      | 318  | -0.049221066 | 0.283073836 |
| PLASMA MEMBRANE ORGANIZATION                                              | 181  | 0.10359135   | 0.096219806 |
| REGULATION OF NEUROTRANSMITTER SECRETION                                  | 41   | -0.040537761 | 0.748988696 |
| POSITIVE REGULATION OF PROTEIN CATABOLIC PROCESS                          | 244  | -0.046924554 | 0.369121698 |
| ACTIVATION OF ADENYLATE CYCLASE ACTIVITY                                  | 27   | -0.013532891 | 0.931351244 |
| WHITE FAT CELL DIFFERENTIATION                                            | 11   | 0.019014733  | 0.938808156 |
| OOGENESIS                                                                 | 53   | 0.120504042  | 0.292498184 |
| REGULATION OF SHORT TERM NEURONAL SYNAPTIC PLASTICITY                     | 12   | -0.061424724 | 0.791821707 |
| ALDEHYDE CATABOLIC PROCESS                                                | 12   | 0.014127246  | 0.952453263 |
| RESPONSE TO TYPE I INTERFERON                                             | 57   | -0.196775918 | 0.058152194 |
| MITOCHONDRIAL RESPIRATORY CHAIN COMPLEX ASSEMBLY                          | 72   | -0.121348496 | 0.193445887 |
| HYALURONAN CATABOLIC PROCESS                                              | 14   | 0.109190283  | 0.622660174 |
| NEUROTRANSMITTER BIOSYNTHETIC PROCESS                                     | 7    | 0.45269038   | 0.140138594 |
| PENTOSE PHOSPHATE SHUNT                                                   | 13   | -0.060964046 | 0.785078318 |
| CYTOKINE MEDIATED SIGNALING PATHWAY                                       | 369  | -0.051605312 | 0.225963911 |
| ATP GENERATION FROM ADP                                                   | 35   | 0.070720034  | 0.613891519 |
| NEGATIVE REGULATION OF LOCOMOTION                                         | 238  | 0.027796304  | 0.605010512 |
| IMP METABOLIC PROCESS                                                     | 14   | -0.102515491 | 0.630721253 |
| NCRNA 3 END PROCESSING                                                    | 20   | -0.198095965 | 0.247186551 |
| LYMPH NODE DEVELOPMENT                                                    | 15   | -0.236015514 | 0.224293533 |
| REGULATION OF CELLULAR COMPONENT SIZE                                     | 301  | 0.0205245    | 0.66780227  |
| MITOCHONDRIAL TRANSPORT                                                   | 167  | -0.139699169 | 0.022534255 |
| SULFUR COMPOUND BIOSYNTHETIC PROCESS                                      | 171  | -0.109099629 | 0.074496674 |
| T CELL PROLIFERATION                                                      | 31   | -0.26553745  | 0.049040987 |
| REGULATION OF RESPIRATORY GASEOUS EXCHANGE BY NEUROLOGICAL SYSTEM PROCESS | 11   | -0.363257758 | 0.085130164 |
| PROTEIN TARGETING                                                         | 379  | -0.088532947 | 0.033801233 |
| POSITIVE REGULATION OF CHOLESTEROL EFFLUX                                 | 13   | 0.224011216  | 0.338115256 |
| SINGLE ORGANISM BIOSYNTHETIC PROCESS                                      | 1155 | -0.072626954 | 0.003277707 |
| POSITIVE REGULATION OF VIRAL GENOME REPLICATION                           | 30   | -0.019006705 | 0.898410952 |
| NEGATIVE REGULATION OF INNATE IMMUNE RESPONSE                             | 32   | -0.378955939 | 0.002599834 |
| REGULATION OF ALPHA AMINO 3 HYDROXY 5 METHYL 4 ISOXAZOLE                  | 16   | 0.075746427  | 0.715084913 |
| PROPIONATE SELECTIVE GLUTAMATE RECEPTOR ACTIVITY                          | 23   | 0.124275381  | 0.474203331 |
| REGULATION OF ENDOTHELIAL CELL DIFFERENTIATION                            | 13   | 0.239834705  | 0.295800022 |
| REGULATION OF NOREPINEPHRINE SECRETION                                    | 68   | 0.01629463   | 0.870256675 |
| GLIAL CELL DEVELOPMENT                                                    | 102  | -0.143876761 | 0.064899545 |
| MITOCHONDRIAL TRANSLATION                                                 | 21   | -0.126488762 | 0.46252941  |
| REGULATION OF RETINOIC ACID RECEPTOR SIGNALING PATHWAY                    | 149  | -0.021176628 | 0.752077697 |
| STRIATED MUSCLE CELL DIFFERENTIATION                                      | 66   | 0.107741026  | 0.293209076 |
| REGULATION OF SYSTEMIC ARTERIAL BLOOD PRESSURE                            | 51   | 0.11387838   | 0.329781755 |
| REGULATION OF SMOOTH MUSCLE CONTRACTION                                   | 16   | -0.281305807 | 0.123815584 |
| POLYOL CATABOLIC PROCESS                                                  | 137  | -0.124395019 | 0.066630321 |
| SECOND MESSENGER MEDIATED SIGNALING                                       | 580  | 0.062210866  | 0.07569024  |
| CELL CELL SIGNALING                                                       | 25   | -0.241070381 | 0.118078112 |
| NEGATIVE REGULATION OF B CELL ACTIVATION                                  | 24   | -0.024279716 | 0.883840637 |
| POSITIVE REGULATION OF COAGULATION                                        | 19   | -0.036929729 | 0.842743495 |
| NEGATIVE REGULATION OF PROTEIN TYROSINE KINASE ACTIVITY                   | 43   | 0.224016554  | 0.082007168 |
| LUNG MORPHOGENESIS                                                        | 17   | 0.242955761  | 0.228279142 |
| VENTRICULAR CARDIAC MUSCLE CELL DIFFERENTIATION                           | 9    | 0.108903394  | 0.694056286 |
| OXIDATIVE DEMETHYLATION                                                   | 19   | 0.031908244  | 0.865905087 |
| REGULATION OF MACROPHAGE ACTIVATION                                       | 72   | 0.097283566  | 0.322375792 |
| VASCULAR ENDOTHELIAL GROWTH FACTOR RECEPTOR SIGNALING PATHWAY             | 397  | -0.040230031 | 0.32926661  |
| POSITIVE REGULATION OF MAPK CASCADE                                       | 63   | -0.149419115 | 0.131732419 |
| MULTICELLULAR ORGANISMAL MACROMOLECULE METABOLIC PROCESS                  | 147  | 0.005773276  | 0.932223638 |
| CARBOHYDRATE DERIVATIVE CATABOLIC PROCESS                                 | 49   | -0.058883974 | 0.609787405 |
| L AMINO ACID TRANSPORT                                                    | 8    | 0.121456964  | 0.680490808 |
| POSITIVE REGULATION OF ACTION POTENTIAL                                   | 125  | -0.023139557 | 0.751556694 |
| REGULATION OF MUSCLE CONTRACTION                                          | 16   | -0.098501984 | 0.622508508 |
| REGULATION OF CHOLESTEROL EFFLUX                                          | 153  | -0.009413296 | 0.887155979 |
| REGULATION OF EXOCYTOSIS                                                  |      |              |             |

|                                                                |      |              |             |
|----------------------------------------------------------------|------|--------------|-------------|
| NEGATIVE REGULATION OF TOLL LIKE RECEPTOR SIGNALING PATHWAY    | 25   | 0.080516433  | 0.628675987 |
| ANION TRANSMEMBRANE TRANSPORT                                  | 198  | -0.006961079 | 0.905171685 |
| POSITIVE REGULATION OF PROTEIN LOCALIZATION TO CELL SURFACE    | 10   | -0.249373911 | 0.298443819 |
| PROTEIN MODIFICATION BY SMALL PROTEIN CONJUGATION OR REMOVAL   | 780  | -0.062249296 | 0.036109278 |
| RENAL VESICLE DEVELOPMENT                                      | 12   | -0.099787432 | 0.664662416 |
| REGULATION OF BODY FLUID LEVELS                                | 431  | -0.040391753 | 0.308057581 |
| REGULATION OF HORMONE LEVELS                                   | 380  | 0.012392937  | 0.771159425 |
| BONE CELL DEVELOPMENT                                          | 20   | -0.394890124 | 0.011389296 |
| REGULATION OF DEFENSE RESPONSE                                 | 640  | -0.047077667 | 0.150144506 |
| NEGATIVE REGULATION OF NEUROLOGICAL SYSTEM PROCESS             | 12   | 0.160433203  | 0.503419117 |
| PYRIMIDINE NUCLEOSIDE MONOPHOSPHATE METABOLIC PROCESS          | 14   | -0.026900632 | 0.901514886 |
| POSITIVE REGULATION OF HEART GROWTH                            | 24   | 0.115059835  | 0.497944867 |
| NEGATIVE REGULATION OF LIPID BIOSYNTHETIC PROCESS              | 39   | 0.26965034   | 0.04132378  |
| NEGATIVE REGULATION OF PEPTIDE SECRETION                       | 39   | 0.033425315  | 0.800134632 |
| VESICLE TARGETING                                              | 73   | -0.205361477 | 0.023156413 |
| REGULATION OF PROTEIN EXPORT FROM NUCLEUS                      | 33   | -0.276009771 | 0.031708683 |
| LAYER FORMATION IN CEREBRAL CORTEX                             | 14   | -0.07108515  | 0.74096825  |
| POSITIVE REGULATION OF ACTIN CYTOSKELETON REORGANIZATION       | 14   | -0.02992471  | 0.890394987 |
| SEX DETERMINATION                                              | 13   | 0.549065642  | 0.020673896 |
| OLIGOSACCHARIDE CATABOLIC PROCESS                              | 9    | 0.26347534   | 0.330775343 |
| B CELL PROLIFERATION                                           | 24   | 0.164969965  | 0.334096788 |
| POSITIVE REGULATION OF DNA METABOLIC PROCESS                   | 167  | -0.020294426 | 0.748782246 |
| PROTEASOME ASSEMBLY                                            | 13   | -0.329755874 | 0.094230521 |
| ESTABLISHMENT OF PROTEIN LOCALIZATION TO ENDOPLASMIC RETICULUM | 104  | -0.133308068 | 0.086024534 |
| PYRIMIDINE NUCLEOSIDE TRIPHOSPHATE BIOSYNTHETIC PROCESS        | 17   | -0.41117209  | 0.016814933 |
| NEGATIVE REGULATION OF ENDOCYTOSIS                             | 33   | -0.222896055 | 0.092953594 |
| RESPONSE TO POTASSIUM ION                                      | 10   | 0.171036383  | 0.515337529 |
| REGULATION OF LYMPHOCYTE APOPTOTIC PROCESS                     | 47   | -0.131799224 | 0.252841658 |
| SMALL MOLECULE METABOLIC PROCESS                               | 1486 | -0.033322306 | 0.133681276 |
| THYMUS DEVELOPMENT                                             | 42   | -0.105724311 | 0.390680416 |
| NEGATIVE REGULATION OF ADHERENS JUNCTION ORGANIZATION          | 15   | -0.265723843 | 0.164375929 |
| HOMEOSTATIC PROCESS                                            | 1100 | 0.004123642  | 0.872201025 |
| CEREBELLAR CORTEX MORPHOGENESIS                                | 24   | -0.142909271 | 0.373070986 |
| POSITIVE REGULATION OF CYTOPLASMIC TRANSPORT                   | 239  | -0.053510362 | 0.309856327 |
| MORPHOGENESIS OF AN EPITHELIUM                                 | 357  | -0.026929911 | 0.536465573 |
| OSTEOBLAST DIFFERENTIATION                                     | 113  | -0.021533012 | 0.779390001 |
| REGULATION OF STRIATED MUSCLE CELL DIFFERENTIATION             | 75   | 0.048002753  | 0.615422902 |
| DEFENSE RESPONSE TO VIRUS                                      | 133  | -0.080763488 | 0.247441447 |
| SENSORY PERCEPTION OF CHEMICAL STIMULUS                        | 101  | 0.250058753  | 0.002287168 |
| REGULATION OF RUFFLE ASSEMBLY                                  | 19   | 0.152600068  | 0.422946876 |
| CELLULAR PIGMENTATION                                          | 42   | 0.124518745  | 0.332128451 |
| NEGATIVE REGULATION OF CALCIUM ION DEPENDENT EXOCYTOSIS        | 10   | 0.229655293  | 0.384715344 |
| VACUOLAR TRANSPORT                                             | 235  | 0.097779712  | 0.07399573  |
| NEGATIVE REGULATION OF CELL CELL ADHESION                      | 123  | 0.006447147  | 0.930724752 |
| POSITIVE REGULATION OF VIRAL RELEASE FROM HOST CELL            | 15   | 0.369458361  | 0.103771339 |
| LEUKOCYTE MEDIATED CYTOTOXICITY                                | 27   | 0.018267867  | 0.908047914 |
| POSITIVE REGULATION OF VACUOLAR TRANSPORT                      | 14   | -0.246967653 | 0.234551504 |
| POSITIVE REGULATION OF LYASE ACTIVITY                          | 41   | -0.044613786 | 0.724453865 |
| ENTRAINMENT OF CIRCADIAN CLOCK BY PHOTOPERIOD                  | 18   | -0.144166152 | 0.43924766  |
| SUPEROXIDE METABOLIC PROCESS                                   | 22   | 0.07211875   | 0.683493567 |
| ORGANIC HYDROXY COMPOUND METABOLIC PROCESS                     | 395  | 0.051248211  | 0.223525763 |
| TELOMERE MAINTENANCE VIA TELOMERE LENGTHENING                  | 24   | -0.107905351 | 0.507011202 |
| PHOTOTRANSDUCTION                                              | 28   | 0.043968401  | 0.778130368 |
| REGULATION OF LIGASE ACTIVITY                                  | 120  | -0.095648906 | 0.191151533 |
| REGULATION OF OXIDOREDUCTASE ACTIVITY                          | 77   | 0.146823164  | 0.12402866  |
| SULFATE TRANSPORT                                              | 9    | -0.490388287 | 0.023352405 |
| RESPONSE TO FOOD                                               | 16   | -0.052981369 | 0.793075577 |
| REGULATION OF PROTEIN INSERTION INTO MITOCHONDRIAL MEMBRANE    | 28   | -0.151871306 | 0.304956813 |
| INVOLVED IN APOPTOTIC SIGNALING PATHWAY                        |      |              |             |
| TELOMERE ORGANIZATION                                          | 100  | -0.077020782 | 0.338783984 |
| IMMUNE SYSTEM DEVELOPMENT                                      | 508  | -0.039682432 | 0.278413653 |
| CAMP BIOSYNTHETIC PROCESS                                      | 11   | 0.228195703  | 0.357611744 |
| ALPHA AMINO ACID CATABOLIC PROCESS                             | 79   | 0.059886027  | 0.520692635 |
| CELLULAR COMPONENT MAINTENANCE                                 | 14   | -0.121794348 | 0.565242495 |
| REGULATION OF CARDIAC MUSCLE CELL CONTRACTION                  | 26   | -0.195689483 | 0.195847314 |
| FC GAMMA RECEPTOR SIGNALING PATHWAY                            | 65   | 0.023714598  | 0.816498295 |

|                                                                                                                           |     |              |             |
|---------------------------------------------------------------------------------------------------------------------------|-----|--------------|-------------|
| RRNA METABOLIC PROCESS                                                                                                    | 246 | -0.105264401 | 0.039972774 |
| RESPIRATORY SYSTEM PROCESS                                                                                                | 14  | -0.113216681 | 0.594286499 |
| NEUROTRANSMITTER TRANSPORT                                                                                                | 119 | 0.020458376  | 0.786686853 |
| REGULATION OF T HELPER CELL DIFFERENTIATION                                                                               | 22  | 0.11065618   | 0.534214147 |
| REGULATION OF VOLTAGE GATED CALCIUM CHANNEL ACTIVITY                                                                      | 17  | -0.291214038 | 0.104659173 |
| PH REDUCTION                                                                                                              | 34  | 0.262962121  | 0.065610453 |
| POSITIVE REGULATION OF TRIGLYCERIDE LIPASE ACTIVITY                                                                       | 6   | -0.135788612 | 0.673356379 |
| MONOSACCHARIDE CATABOLIC PROCESS                                                                                          | 49  | 0.009847198  | 0.933093382 |
| POSITIVE REGULATION OF MRNA METABOLIC PROCESS                                                                             | 42  | -0.074121188 | 0.550271201 |
| RESPONSE TO FUNGICIDE                                                                                                     | 8   | -0.072842231 | 0.79744968  |
| NEGATIVE REGULATION BY HOST OF VIRAL TRANSCRIPTION                                                                        | 12  | 0.266679457  | 0.263513323 |
| REGULATION OF EPIDERMAL GROWTH FACTOR ACTIVATED RECEPTOR ACTIVITY                                                         | 21  | -0.061360288 | 0.72760326  |
| PROTEIN NEDDYLATION                                                                                                       | 13  | 0.056958334  | 0.803759409 |
| POTASSIUM ION HOMEOSTASIS                                                                                                 | 16  | -0.021016396 | 0.917802557 |
| HORMONE TRANSPORT                                                                                                         | 56  | -0.090814175 | 0.395946271 |
| PROTEIN CATABOLIC PROCESS                                                                                                 | 507 | -0.034989794 | 0.340210832 |
| POSITIVE REGULATION OF INTRACELLULAR STEROID HORMONE RECEPTOR SIGNALING PATHWAY                                           | 12  | 0.230644214  | 0.34972647  |
| NEGATIVE REGULATION OF MYOTUBE DIFFERENTIATION                                                                            | 15  | 0.264484186  | 0.21008897  |
| INORGANIC ANION TRANSPORT                                                                                                 | 95  | 0.02491769   | 0.768395681 |
| CARBOHYDRATE PHOSPHORYLATION                                                                                              | 20  | -0.00944639  | 0.958754167 |
| PROTEIN IMPORT                                                                                                            | 139 | -0.007220873 | 0.917366093 |
| NUCLEOSIDE BISPHOSPHATE METABOLIC PROCESS                                                                                 | 33  | 0.070942782  | 0.622971241 |
| REGULATION OF INTRACELLULAR STEROID HORMONE RECEPTOR SIGNALING PATHWAY                                                    | 51  | -0.025342878 | 0.824197925 |
| MAMMARY GLAND EPITHELIAL CELL DIFFERENTIATION                                                                             | 16  | 0.430215754  | 0.032492437 |
| CELLULAR RESPONSE TO GAMMA RADIATION                                                                                      | 19  | -0.135307552 | 0.453697966 |
| REGULATION OF HEAT GENERATION                                                                                             | 15  | 0.060425406  | 0.777155777 |
| REGULATION OF FIBROBLAST MIGRATION                                                                                        | 26  | 0.006637388  | 0.96707375  |
| INDUCTION OF POSITIVE CHEMOTAXIS                                                                                          | 12  | -0.054231106 | 0.815912768 |
| REGENERATION                                                                                                              | 144 | -0.038778072 | 0.567929517 |
| EXTRINSIC APOPTOTIC SIGNALING PATHWAY                                                                                     | 87  | -0.10808492  | 0.20689568  |
| REGULATION OF TRANSLATIONAL ELONGATION                                                                                    | 23  | -0.091305798 | 0.58438598  |
| CELL MATRIX ADHESION                                                                                                      | 105 | -0.027354495 | 0.731165932 |
| PITUITARY GLAND DEVELOPMENT                                                                                               | 33  | -0.076498632 | 0.584099478 |
| MATING                                                                                                                    | 28  | 0.28078866   | 0.071344151 |
| DEVELOPMENTAL INDUCTION                                                                                                   | 23  | -0.270029983 | 0.082694319 |
| REGULATION OF TRANSFERASE ACTIVITY                                                                                        | 844 | -0.086943531 | 0.002260501 |
| NEGATIVE REGULATION OF ALCOHOL BIOSYNTHETIC PROCESS                                                                       | 16  | 0.598092066  | 0.000698261 |
| CHROMOSOME SEPARATION                                                                                                     | 16  | -0.488406809 | 0.002146639 |
| GANGLIOSIDE METABOLIC PROCESS                                                                                             | 22  | -0.061138746 | 0.722032149 |
| TISSUE HOMEOSTASIS                                                                                                        | 133 | 0.092480388  | 0.2014723   |
| ANTIGEN PROCESSING AND PRESENTATION VIA MHC CLASS IB                                                                      | 12  | -0.080366968 | 0.728411212 |
| GAMMA AMINOBUTYRIC ACID SIGNALING PATHWAY                                                                                 | 18  | 0.04801747   | 0.805139758 |
| POSITIVE REGULATION OF STEROL TRANSPORT                                                                                   | 15  | 0.200943628  | 0.353935778 |
| ADAPTIVE IMMUNE RESPONSE BASED ON SOMATIC RECOMBINATION OF IMMUNE RECEPTORS BUILT FROM IMMUNOGLOBULIN SUPERFAMILY DOMAINS | 102 | 0.073716373  | 0.370945358 |
| CELL CYCLE ARREST                                                                                                         | 144 | -0.080380714 | 0.231645809 |
| THYROID HORMONE METABOLIC PROCESS                                                                                         | 13  | 0.118360464  | 0.607869881 |
| APOPTOTIC CELL CLEARANCE                                                                                                  | 21  | 0.10132216   | 0.577584194 |
| MODIFICATION OF MORPHOLOGY OR PHYSIOLOGY OF OTHER ORGANISM                                                                | 90  | 0.124691986  | 0.156915908 |
| RIBOSOME ASSEMBLY                                                                                                         | 51  | -0.274721178 | 0.00913108  |
| NEGATIVE REGULATION OF ACTIN FILAMENT DEPOLYMERIZATION                                                                    | 29  | 0.046563088  | 0.761403435 |
| DNA LIGATION INVOLVED IN DNA REPAIR                                                                                       | 12  | 0.479616508  | 0.0327038   |
| REGULATION OF CELL JUNCTION ASSEMBLY                                                                                      | 65  | -0.00576248  | 0.954750565 |
| HYPEROSMOTIC RESPONSE                                                                                                     | 17  | -0.200720505 | 0.28236743  |
| REGULATION OF SMAD PROTEIN IMPORT INTO NUCLEUS                                                                            | 12  | -0.002065938 | 0.993019355 |
| NEGATIVE REGULATION OF NATURAL KILLER CELL MEDIATED IMMUNITY                                                              | 10  | -0.467115402 | 0.029082118 |
| ARTERY DEVELOPMENT                                                                                                        | 70  | -0.014260947 | 0.883939804 |
| PROTEIN DEALKYLATION                                                                                                      | 26  | -0.019824589 | 0.901319156 |
| NEGATIVE REGULATION OF DENDRITE MORPHOGENESIS                                                                             | 12  | -0.172503088 | 0.439505273 |
| NEGATIVE REGULATION OF TYPE I INTERFERON PRODUCTION                                                                       | 37  | -0.105282739 | 0.422224547 |
| EXTRACELLULAR MATRIX ASSEMBLY                                                                                             | 14  | -0.071265226 | 0.739946424 |
| POSTREPLICATION REPAIR                                                                                                    | 51  | -0.094867643 | 0.39806359  |
| SKELETAL SYSTEM DEVELOPMENT                                                                                               | 395 | 0.005798728  | 0.889556427 |

|                                                                         |      |              |             |
|-------------------------------------------------------------------------|------|--------------|-------------|
| ORGANOPHOSPHATE METABOLIC PROCESS                                       | 776  | -0.041369435 | 0.166431607 |
| CARDIAC MYOFIBRIL ASSEMBLY                                              | 12   | -0.044139187 | 0.850279005 |
| REGULATION OF HEART CONTRACTION                                         | 179  | 0.085783273  | 0.169389828 |
| CELLULAR AMINO ACID BIOSYNTHETIC PROCESS                                | 78   | -0.050817577 | 0.579633063 |
| CRANIAL NERVE MORPHOGENESIS                                             | 20   | -0.062095459 | 0.730499217 |
| ACTIVATION OF JUN KINASE ACTIVITY                                       | 30   | -0.055213061 | 0.7081883   |
| REGULATION OF BROWN FAT CELL DIFFERENTIATION                            | 10   | 0.025314945  | 0.922456552 |
| FIBRIL ORGANIZATION                                                     | 18   | 0.205483587  | 0.294576486 |
| LONG CHAIN FATTY ACID METABOLIC PROCESS                                 | 64   | 0.152235844  | 0.143904782 |
| MONOVALENT INORGANIC CATION TRANSPORT                                   | 322  | -0.011287644 | 0.806037426 |
| RELAXATION OF CARDIAC MUSCLE                                            | 13   | -0.246291923 | 0.237371882 |
| POSITIVE REGULATION OF BEHAVIOR                                         | 15   | 0.180405184  | 0.40145762  |
| CALCIUM MEDIATED SIGNALING USING INTRACELLULAR CALCIUM SOURCE           | 15   | -0.131319652 | 0.517237874 |
| NEURAL TUBE DEVELOPMENT                                                 | 138  | -0.116560775 | 0.086231838 |
| POLYSACCHARIDE METABOLIC PROCESS                                        | 74   | 0.0161058    | 0.866281882 |
| REGULATION OF INTRACELLULAR SIGNAL TRANSDUCTION                         | 1450 | -0.035536767 | 0.113505118 |
| CYCLIC NUCLEOTIDE METABOLIC PROCESS                                     | 44   | 0.085014142  | 0.497238299 |
| POSITIVE REGULATION OF T CELL PROLIFERATION                             | 82   | -0.113827394 | 0.195423257 |
| MULTICELLULAR ORGANISMAL MOVEMENT                                       | 33   | 0.011793723  | 0.934228986 |
| CLATHRIN COAT ASSEMBLY                                                  | 12   | 0.159279047  | 0.507705941 |
| NEGATIVE REGULATION OF MEIOTIC NUCLEAR DIVISION                         | 9    | -0.004344284 | 0.987280298 |
| VASCULAR SMOOTH MUSCLE CELL DIFFERENTIATION                             | 12   | -0.020015365 | 0.932176359 |
| POSITIVE REGULATION OF BIOSYNTHETIC PROCESS                             | 1573 | 0.027777543  | 0.204603224 |
| NEGATIVE REGULATION OF NITROGEN COMPOUND METABOLIC PROCESS              | 1345 | 0.011182263  | 0.632984665 |
| DNA INTEGRATION                                                         | 8    | -0.287425728 | 0.276906652 |
| CELL ACTIVATION                                                         | 484  | -0.049987454 | 0.181178754 |
| REGULATION OF MYELINATION                                               | 30   | 0.20841159   | 0.170846629 |
| NEGATIVE REGULATION OF JUN KINASE ACTIVITY                              | 13   | -0.077157327 | 0.728599631 |
| REGULATION OF AXON GUIDANCE                                             | 37   | 0.078651479  | 0.564490992 |
| REGULATION OF DOPAMINE SECRETION                                        | 17   | 0.230284105  | 0.250209761 |
| RESPONSE TO COPPER ION                                                  | 25   | -0.028212526 | 0.862312429 |
| REGULATION OF CIRCADIAN SLEEP WAKE CYCLE                                | 14   | 0.213612965  | 0.334616572 |
| NEGATIVE REGULATION OF CELLULAR PROTEIN CATABOLIC PROCESS               | 62   | -0.066170093 | 0.518164181 |
| REGULATION OF DOUBLE STRAND BREAK REPAIR VIA HOMOLOGOUS RECOMBINATION   | 17   | 0.246584228  | 0.221712276 |
| RESPONSE TO AXON INJURY                                                 | 45   | -0.161234276 | 0.167757464 |
| REGULATION OF VACUOLE ORGANIZATION                                      | 38   | 0.049525831  | 0.712022516 |
| CIRCADIAN REGULATION OF GENE EXPRESSION                                 | 54   | 0.07939377   | 0.483120616 |
| RETINOL METABOLIC PROCESS                                               | 23   | 0.08820697   | 0.610033848 |
| OXALOACETATE METABOLIC PROCESS                                          | 11   | -0.080821352 | 0.737863179 |
| NEGATIVE REGULATION OF TUMOR NECROSIS FACTOR MEDIATED SIGNALING PATHWAY | 12   | -0.048953718 | 0.833823366 |
| NEGATIVE REGULATION OF EXOCYTOSIS                                       | 26   | 0.085235255  | 0.6008353   |
| INTRACELLULAR STEROID HORMONE RECEPTOR SIGNALING PATHWAY                | 64   | 0.074642354  | 0.472776273 |
| REGULATION OF WNT SIGNALING PATHWAY                                     | 278  | 0.060163436  | 0.229484622 |
| NEGATIVE REGULATION OF CELL JUNCTION ASSEMBLY                           | 19   | -0.062345713 | 0.735889215 |
| ANTIGEN PROCESSING AND PRESENTATION OF PEPTIDE ANTIGEN                  | 157  | -0.127715375 | 0.044081446 |
| HIPPO SIGNALING                                                         | 26   | -0.361857858 | 0.014044809 |
| NEGATIVE REGULATION OF EPITHELIAL TO MESENCHYMAL TRANSITION             | 20   | 0.079610022  | 0.667706373 |
| REGULATION OF MEMBRANE DEPOLARIZATION                                   | 34   | 0.060642775  | 0.66923085  |
| AMINO SUGAR BIOSYNTHETIC PROCESS                                        | 10   | 0.167623648  | 0.526010763 |
| REGULATION OF NERVOUS SYSTEM DEVELOPMENT                                | 645  | 0.019648537  | 0.552125843 |
| REGULATION OF ESTABLISHMENT OF PROTEIN LOCALIZATION TO CHROMOSOME       | 10   | 0.113376336  | 0.666192453 |
| REGULATION OF CARDIAC MUSCLE CELL DIFFERENTIATION                       | 18   | 0.191668302  | 0.33115892  |
| POSITIVE REGULATION OF DIGESTIVE SYSTEM PROCESS                         | 8    | 0.159110104  | 0.593935276 |
| INTRINSIC APOPTOTIC SIGNALING PATHWAY IN RESPONSE TO DNA DAMAGE         | 65   | 0.008231952  | 0.935588708 |
| TETRAPYRROLE BIOSYNTHETIC PROCESS                                       | 26   | -0.285438323 | 0.049930893 |
| NUCLEOSIDE PHOSPHATE BIOSYNTHETIC PROCESS                               | 160  | -0.126086963 | 0.044926776 |
| PROTEIN LIPID COMPLEX ASSEMBLY                                          | 18   | 0.146322899  | 0.456026911 |
| POSITIVE REGULATION OF SODIUM ION TRANSPORT                             | 32   | 0.126707181  | 0.391534546 |
| DETECTION OF OTHER ORGANISM                                             | 10   | -0.196785428 | 0.416723453 |
| ESTABLISHMENT OF LOCALIZATION IN CELL                                   | 1529 | -0.075894135 | 0.000496437 |
| G PROTEIN COUPLED GLUTAMATE RECEPTOR SIGNALING PATHWAY                  | 10   | -0.003618238 | 0.988835096 |
| NEURAL RETINA DEVELOPMENT                                               | 41   | 0.005958238  | 0.962899232 |
| CLEAVAGE INVOLVED IN RRNA PROCESSING                                    | 19   | 0.020033291  | 0.915389288 |

|                                                                              |     |              |             |
|------------------------------------------------------------------------------|-----|--------------|-------------|
| REGULATION OF EXIT FROM MITOSIS                                              | 15  | -0.297136179 | 0.117538048 |
| FORELIMB MORPHOGENESIS                                                       | 36  | -0.034150815 | 0.800890003 |
| ASPARTATE FAMILY AMINO ACID BIOSYNTHETIC PROCESS                             | 22  | -0.014940684 | 0.931552289 |
| MANGANESE ION TRANSPORT                                                      | 11  | -0.26833055  | 0.232646759 |
| POSITIVE REGULATION OF HISTONE H3 K4 METHYLATION                             | 16  | -0.140711376 | 0.47369245  |
| NEURON PROJECTION DEVELOPMENT                                                | 472 | 0.04669436   | 0.226375909 |
| MALE GAMETE GENERATION                                                       | 349 | 0.122700447  | 0.00660592  |
| POSITIVE REGULATION OF FIBROBLAST MIGRATION                                  | 9   | -0.078963447 | 0.768006079 |
| NEGATIVE REGULATION OF RESPONSE TO OXIDATIVE STRESS                          | 33  | 0.006472279  | 0.963837237 |
| CHAPERONE MEDIATED PROTEIN COMPLEX ASSEMBLY                                  | 12  | 0.080178955  | 0.73768386  |
| ORGANELLE TRANSPORT ALONG MICROTUBULE                                        | 58  | -0.068879264 | 0.515447358 |
| CHONDROCYTE DEVELOPMENT                                                      | 19  | -0.038782496 | 0.834908263 |
| MEMBRANE RAFT ORGANIZATION                                                   | 15  | 0.01788017   | 0.932813997 |
| MITOTIC SISTER CHROMATID SEGREGATION                                         | 85  | -0.179345469 | 0.03388762  |
| MICROTUBULE NUCLEATION                                                       | 16  | 0.189086984  | 0.367875437 |
| ESTABLISHMENT OF PROTEIN LOCALIZATION TO ORGANELLE                           | 337 | -0.05666659  | 0.202856262 |
| NEGATIVE REGULATION OF ACUTE INFLAMMATORY RESPONSE                           | 10  | -0.071325694 | 0.778859678 |
| REGULATION OF SEQUESTERING OF CALCIUM ION                                    | 91  | -0.211265401 | 0.008789987 |
| REGULATION OF MEMBRANE LIPID METABOLIC PROCESS                               | 11  | 0.171174959  | 0.496734492 |
| XENOPHAGY                                                                    | 94  | -0.155208571 | 0.055211065 |
| DRUG TRANSMEMBRANE TRANSPORT                                                 | 16  | 0.076000142  | 0.714291025 |
| POSITIVE REGULATION OF MEMBRANE DEPOLARIZATION                               | 8   | 0.050774133  | 0.861929668 |
| MYD88 DEPENDENT TOLL LIKE RECEPTOR SIGNALING PATHWAY                         | 29  | 0.194048988  | 0.21087349  |
| REGULATION OF PROTEIN POLYMERIZATION                                         | 153 | 0.10502789   | 0.120156875 |
| REGULATION OF PROTEIN TARGETING TO MEMBRANE                                  | 28  | -0.072522158 | 0.633049256 |
| KIDNEY EPITHELIUM DEVELOPMENT                                                | 109 | -0.012277981 | 0.875594078 |
| HISTONE H2A UBIQUITINATION                                                   | 16  | 0.165497985  | 0.429179218 |
| TOOTH MINERALIZATION                                                         | 11  | 0.001914346  | 0.993812071 |
| REGULATION OF HAIR CYCLE                                                     | 20  | 0.446944351  | 0.008048051 |
| NEGATIVE REGULATION OF BONE REMODELING                                       | 11  | -0.179252704 | 0.448017861 |
| POSITIVE REGULATION OF RECEPTOR MEDIATED ENDOCYTOSIS                         | 39  | 0.160198663  | 0.233157229 |
| ESTABLISHMENT OF MITOTIC SPINDLE ORIENTATION                                 | 19  | -0.117988968 | 0.517110226 |
| POSITIVE REGULATION OF PROTEIN OLIGOMERIZATION                               | 20  | 0.114572272  | 0.537731482 |
| SPINDLE CHECKPOINT                                                           | 25  | -0.302471525 | 0.03858813  |
| POSITIVE REGULATION OF STAT CASCADE                                          | 60  | -0.103773623 | 0.31413044  |
| LEUKOTRIENE BIOSYNTHETIC PROCESS                                             | 12  | 0.206982534  | 0.386287954 |
| POSITIVE REGULATION OF SUBSTRATE ADHESION DEPENDENT CELL SPREADING           | 26  | -0.098021114 | 0.530986955 |
| POSITIVE REGULATION OF THYMOCYTE AGGREGATION                                 | 9   | -0.177039664 | 0.49156376  |
| CATECHOLAMINE METABOLIC PROCESS                                              | 31  | 0.163579917  | 0.274373295 |
| POSITIVE REGULATION OF PROTEIN COMPLEX DISASSEMBLY                           | 24  | 0.051388808  | 0.760692775 |
| BLASTOCYST FORMATION                                                         | 30  | 0.029276352  | 0.84567181  |
| REGULATION OF WATER LOSS VIA SKIN                                            | 15  | -0.039841635 | 0.849084738 |
| NEGATIVE REGULATION OF REGULATED SECRETORY PATHWAY                           | 20  | 0.012797287  | 0.944410116 |
| CELL DIFFERENTIATION INVOLVED IN METANEPHROS DEVELOPMENT                     | 10  | 0.079800985  | 0.760578606 |
| POSITIVE REGULATION OF ALCOHOL BIOSYNTHETIC PROCESS                          | 19  | 0.141593571  | 0.45721529  |
| REGULATION OF EPITHELIAL CELL DIFFERENTIATION INVOLVED IN KIDNEY DEVELOPMENT | 13  | 0.104856001  | 0.649510657 |
| MAGNESIUM ION TRANSPORT                                                      | 13  | -0.306949104 | 0.142821967 |
| PYRIMIDINE RIBONUCLEOSIDE METABOLIC PROCESS                                  | 27  | -0.340664145 | 0.015262784 |
| PROTEIN LOCALIZATION TO CENTROSOME                                           | 15  | -0.115270704 | 0.573287667 |
| POSITIVE REGULATION OF B CELL PROLIFERATION                                  | 33  | 0.046467767  | 0.746577248 |
| POSITIVE REGULATION OF ORGANELLE ORGANIZATION                                | 516 | -0.043345    | 0.232511686 |
| MUSCLE CELL PROLIFERATION                                                    | 19  | 0.191821818  | 0.317994856 |
| VENTRAL SPINAL CORD INTERNEURON SPECIFICATION                                | 5   | 0.587155341  | 0.105596552 |
| AMINO ACID TRANSMEMBRANE TRANSPORT                                           | 54  | 0.068043066  | 0.546642236 |
| CELLULAR RESPONSE TO ACID CHEMICAL                                           | 158 | -0.023187413 | 0.721639537 |
| PHAGOCYTOSIS ENGULFMENT                                                      | 16  | -0.053397665 | 0.791653262 |
| REGULATION OF TOLERANCE INDUCTION                                            | 16  | -0.037318871 | 0.853987407 |
| REGULATION OF CORTICOSTEROID HORMONE SECRETION                               | 7   | 0.12776755   | 0.684106314 |
| CELLULAR SENESCENCE                                                          | 29  | -0.299883682 | 0.031059664 |
| SULFATION                                                                    | 14  | 0.323111734  | 0.128714494 |
| REGULATION OF MEIOTIC CELL CYCLE                                             | 32  | 0.072033598  | 0.623188976 |
| DNA DEALKYLATION                                                             | 19  | 0.066122779  | 0.72794774  |
| ACTIN FILAMENT BASED MOVEMENT                                                | 76  | 0.024284425  | 0.797271858 |
| POSITIVE REGULATION OF EPITHELIAL CELL PROLIFERATION                         | 138 | -0.070488222 | 0.305232409 |

|                                                                                        |      |              |             |
|----------------------------------------------------------------------------------------|------|--------------|-------------|
| SARCOMERE ORGANIZATION                                                                 | 22   | -0.319275622 | 0.04930697  |
| POSITIVE REGULATION OF B CELL MEDIATED IMMUNITY                                        | 23   | -0.16376312  | 0.313702205 |
| OVULATION CYCLE                                                                        | 97   | -0.018723459 | 0.82147239  |
| NEGATIVE REGULATION OF NITRIC OXIDE METABOLIC PROCESS                                  | 10   | 0.327583665  | 0.196356369 |
| VENTRICULAR SYSTEM DEVELOPMENT                                                         | 21   | 0.080286657  | 0.657333691 |
| ADULT LOCOMOTORY BEHAVIOR                                                              | 69   | 0.009304836  | 0.925041218 |
| REGULATION OF ACTIVATED T CELL PROLIFERATION                                           | 34   | -0.121368935 | 0.371556352 |
| POSITIVE REGULATION OF HOMEOSTATIC PROCESS                                             | 181  | -0.042649579 | 0.481366123 |
| RESPONSE TO GRAVITY                                                                    | 8    | 0.109815488  | 0.70798679  |
| REGULATION OF IMMUNOGLOBULIN SECRETION                                                 | 13   | -0.098260219 | 0.657287946 |
| ACETYL COA METABOLIC PROCESS                                                           | 24   | -0.066652824 | 0.685024207 |
| CREATINE METABOLIC PROCESS                                                             | 7    | -0.274159673 | 0.327449599 |
| REGULATION OF CELLULAR COMPONENT BIOGENESIS                                            | 678  | 0.045496623  | 0.160509521 |
| POSITIVE REGULATION OF MACROPHAGE DERIVED FOAM CELL DIFFERENTIATION                    | 11   | 0.531207422  | 0.012653004 |
| IRON ION TRANSPORT                                                                     | 49   | -0.005037263 | 0.965636224 |
| REGULATION OF RECEPTOR BINDING                                                         | 16   | 0.068215421  | 0.741841126 |
| POSITIVE REGULATION OF POTASSIUM ION TRANSPORT                                         | 32   | -0.162966637 | 0.238597207 |
| POSITIVE REGULATION OF NERVOUS SYSTEM DEVELOPMENT                                      | 374  | 0.031850248  | 0.459937626 |
| REGULATION OF CARDIAC MUSCLE CELL PROLIFERATION                                        | 27   | 0.129369373  | 0.419328565 |
| CELLULAR RESPONSE TO OXYGEN CONTAINING COMPOUND                                        | 702  | -0.022304284 | 0.478562317 |
| REGULATION OF INTERLEUKIN 10 SECRETION                                                 | 8    | 0.477930328  | 0.06612445  |
| REGULATION OF LAMELLIPODIUM ASSEMBLY                                                   | 26   | 0.286964565  | 0.083025043 |
| CELLULAR KETONE METABOLIC PROCESS                                                      | 59   | 0.126654438  | 0.242475569 |
| CRANIAL NERVE DEVELOPMENT                                                              | 36   | 0.018424269  | 0.893037502 |
| WNT SIGNALING PATHWAY CALCIUM MODULATING PATHWAY                                       | 36   | -0.107034516 | 0.420289218 |
| EPIDERMAL GROWTH FACTOR RECEPTOR SIGNALING PATHWAY                                     | 53   | -0.050732154 | 0.648500492 |
| CELL PROLIFERATION IN FOREBRAIN                                                        | 23   | 0.05947497   | 0.730400109 |
| RESPONSE TO MURAMYL DIPEPTIDE                                                          | 14   | -0.32382433  | 0.094914303 |
| REGULATION OF POSITIVE CHEMOTAXIS                                                      | 22   | 0.060550386  | 0.731288205 |
| REGULATION OF IMMUNE RESPONSE                                                          | 680  | -0.027717309 | 0.385207222 |
| NEGATIVE REGULATION OF NOTCH SIGNALING PATHWAY                                         | 27   | 0.214862671  | 0.1773333   |
| MEMBRANE LIPID CATABOLIC PROCESS                                                       | 18   | 0.203135246  | 0.296815545 |
| POSITIVE REGULATION OF NEUROBLAST PROLIFERATION                                        | 17   | 0.049200947  | 0.80596451  |
| CARTILAGE MORPHOGENESIS                                                                | 10   | 0.410815319  | 0.104267591 |
| PEPTIDE SECRETION                                                                      | 43   | 0.114572876  | 0.366751723 |
| THIOESTER METABOLIC PROCESS                                                            | 70   | 0.01136441   | 0.907901515 |
| NEGATIVE REGULATION OF INTRINSIC APOPTOTIC SIGNALING PATHWAY IN RESPONSE TO DNA DAMAGE | 25   | -0.068407888 | 0.670576025 |
| REGULATION OF T HELPER 2 CELL DIFFERENTIATION                                          | 10   | 0.044783572  | 0.863734481 |
| NEGATIVE REGULATION OF CELLULAR AMIDE METABOLIC PROCESS                                | 125  | 0.050746528  | 0.494247267 |
| PURINE RIBONUCLEOSIDE BISPHOSPHATE METABOLIC PROCESS                                   | 17   | 0.103452316  | 0.607924413 |
| PEPTIDYL CYSTEINE MODIFICATION                                                         | 19   | -0.132907122 | 0.460784565 |
| LEUKOCYTE DIFFERENTIATION                                                              | 249  | 0.005639948  | 0.914180542 |
| RESPONSE TO EXOGENOUS DSRNA                                                            | 34   | -0.049640099 | 0.720511106 |
| MORPHOGENESIS OF EMBRYONIC EPITHELIUM                                                  | 127  | -0.116476249 | 0.099891516 |
| SKELETAL MUSCLE CONTRACTION                                                            | 24   | 0.188784852  | 0.268142492 |
| POSITIVE REGULATION OF HORMONE METABOLIC PROCESS                                       | 8    | 0.012219955  | 0.96639199  |
| TONGUE DEVELOPMENT                                                                     | 16   | -0.220049073 | 0.251435936 |
| BONE GROWTH                                                                            | 17   | 0.237206124  | 0.235886947 |
| ACTIN POLYMERIZATION OR DEPOLYMERIZATION                                               | 30   | -0.229060651 | 0.100292452 |
| UV PROTECTION                                                                          | 10   | -0.264123106 | 0.257945698 |
| PROTEIN MODIFICATION BY SMALL PROTEIN REMOVAL                                          | 102  | -0.115044024 | 0.145597847 |
| REGULATION OF NITRIC OXIDE BIOSYNTHETIC PROCESS                                        | 47   | 0.191197282  | 0.116187182 |
| PHOSPHATIDYLGLYCEROL METABOLIC PROCESS                                                 | 24   | 0.150472608  | 0.377369623 |
| PYRIMIDINE NUCLEOSIDE BIOSYNTHETIC PROCESS                                             | 28   | -0.286199008 | 0.043815995 |
| TRANSLATIONAL TERMINATION                                                              | 89   | -0.179540761 | 0.029013546 |
| CYTOKINETIC PROCESS                                                                    | 12   | -0.450060367 | 0.031702824 |
| ENDOCARDIAL CUSHION MORPHOGENESIS                                                      | 21   | 0.136967801  | 0.450143383 |
| REGULATION OF INNATE IMMUNE RESPONSE                                                   | 308  | -0.111559099 | 0.014927399 |
| VESICLE MEDIATED TRANSPORT                                                             | 1053 | 0.031689266  | 0.228053193 |
| INTERLEUKIN 1 PRODUCTION                                                               | 10   | 0.14244886   | 0.588266153 |
| MODULATION BY HOST OF VIRAL PROCESS                                                    | 18   | 0.093566333  | 0.632468493 |
| REGULATION OF DNA REPAIR                                                               | 70   | 0.012793929  | 0.896410456 |
| REGULATION OF MEMBRANE LIPID DISTRIBUTION                                              | 31   | 0.541421057  | 8.17E-05    |
| REFLEX                                                                                 | 18   | -0.249396187 | 0.159289363 |

|                                                                  |     |              |             |
|------------------------------------------------------------------|-----|--------------|-------------|
| LEUKOCYTE MEDIATED IMMUNITY                                      | 128 | -0.0459563   | 0.522414587 |
| ORGANOPHOSPHATE BIOSYNTHETIC PROCESS                             | 391 | -0.077910048 | 0.058358393 |
| NEGATIVE REGULATION OF SERINE TYPE PEPTIDASE ACTIVITY            | 6   | -0.020634317 | 0.950504722 |
| PROTEIN LOCALIZATION TO CELL PERIPHERY                           | 137 | 0.098669057  | 0.167274139 |
| REGULATION OF PROTEIN GLYCOSYLATION                              | 13  | -0.169181047 | 0.430191174 |
| NEGATIVE REGULATION OF FIBROBLAST PROLIFERATION                  | 26  | -0.220974728 | 0.141790212 |
| REGULATION OF MUSCLE TISSUE DEVELOPMENT                          | 93  | 0.152031352  | 0.080215069 |
| ORGANIC ACID BIOSYNTHETIC PROCESS                                | 218 | -0.015040621 | 0.786858519 |
| NEGATIVE REGULATION OF DNA DEPENDENT DNA REPLICATION             | 16  | 0.122942605  | 0.555898594 |
| REGULATION OF LEUKOCYTE MIGRATION                                | 131 | -0.041421978 | 0.560198175 |
| ORGAN MATURATION                                                 | 18  | 0.036982026  | 0.84902734  |
| REGULATION OF CELLULAR RESPONSE TO HEAT                          | 75  | -0.202589245 | 0.023549382 |
| POSITIVE REGULATION OF ACUTE INFLAMMATORY RESPONSE               | 24  | 0.005587587  | 0.973358756 |
| GASTRULATION WITH MOUTH FORMING SECOND                           | 26  | 0.037736123  | 0.81558939  |
| ENDOCARDIUM DEVELOPMENT                                          | 10  | 0.395745156  | 0.13579103  |
| ENDOTHELIAL CELL DIFFERENTIATION                                 | 64  | -0.064876531 | 0.520450046 |
| NEGATIVE REGULATION OF CELLULAR PROTEIN LOCALIZATION             | 124 | -0.131460298 | 0.065131464 |
| INSEMINATION                                                     | 9   | 0.141666445  | 0.609127797 |
| REGULATION OF NUCLEOBASE CONTAINING COMPOUND TRANSPORT           | 12  | 0.173446211  | 0.475152864 |
| PHOSPHATIDYLINOSITOL 3 PHOSPHATE BIOSYNTHETIC PROCESS            | 45  | 0.197565323  | 0.111381388 |
| CYCLIC NUCLEOTIDE CATABOLIC PROCESS                              | 16  | 0.12244886   | 0.556406087 |
| RESPONSE TO EPIDERMAL GROWTH FACTOR                              | 28  | -0.261194243 | 0.067081883 |
| POSITIVE REGULATION OF TRANSMEMBRANE TRANSPORT                   | 106 | -0.201532523 | 0.007321296 |
| REGULATION OF NUCLEOTIDE CATABOLIC PROCESS                       | 33  | 0.150808017  | 0.300066247 |
| POSITIVE REGULATION OF CARBOHYDRATE METABOLIC PROCESS            | 65  | 0.042805258  | 0.676268274 |
| WNT SIGNALING PATHWAY                                            | 313 | -0.05030487  | 0.276180502 |
| REGULATION OF NEUROTRANSMITTER LEVELS                            | 150 | 0.066790114  | 0.325499283 |
| POSITIVE REGULATION OF STRESS ACTIVATED PROTEIN KINASE SIGNALING | 119 | -0.0387697   | 0.603345653 |
| CASCADE                                                          |     |              |             |
| PEPTIDYL ARGININE MODIFICATION                                   | 13  | -0.121534248 | 0.578932158 |
| SPECIFICATION OF ORGAN IDENTITY                                  | 12  | 0.314164532  | 0.182217263 |
| REGULATION OF CELLULAR AMINE METABOLIC PROCESS                   | 74  | -0.091918856 | 0.323329576 |
| RRNA TRANSCRIPTION                                               | 18  | -0.372872851 | 0.029023363 |
| POSITIVE REGULATION OF LIPID TRANSPORT                           | 39  | 0.095975699  | 0.470891004 |
| ANATOMICAL STRUCTURE ARRANGEMENT                                 | 16  | -0.133859048 | 0.497390655 |
| EPITHELIAL TO MESENCHYMAL TRANSITION                             | 54  | 0.094207501  | 0.405232041 |
| PATHWAY RESTRICTED SMAD PROTEIN PHOSPHORYLATION                  | 11  | 0.303031945  | 0.226457037 |
| SINGLE ORGANISM MEMBRANE BUDDING                                 | 69  | -0.123114133 | 0.197593131 |
| NEGATIVE REGULATION OF MAPK CASCADE                              | 135 | -0.049778022 | 0.476535913 |
| SPONGIOTROPHOBLAST LAYER DEVELOPMENT                             | 13  | 0.387746724  | 0.078151672 |
| NEGATIVE REGULATION OF NERVOUS SYSTEM DEVELOPMENT                | 232 | -0.038707014 | 0.470605311 |
| HISTONE H2A MONOUBIQUITINATION                                   | 12  | 0.260009355  | 0.279257912 |
| REGULATION OF EXTRACELLULAR MATRIX ORGANIZATION                  | 25  | 0.286965794  | 0.088064135 |
| CELL DIFFERENTIATION IN SPINAL CORD                              | 38  | 0.07820581   | 0.561672092 |
| MITOTIC G2 M TRANSITION CHECKPOINT                               | 18  | -0.037750498 | 0.843484817 |
| POSITIVE REGULATION OF INTERLEUKIN 8 SECRETION                   | 10  | -0.103798746 | 0.679331758 |
| PYRIMIDINE NUCLEOBASE METABOLIC PROCESS                          | 19  | -0.228314521 | 0.190274295 |
| RNA METHYLATION                                                  | 51  | -0.023921536 | 0.833972481 |
| PURINE CONTAINING COMPOUND SALVAGE                               | 15  | -0.403364427 | 0.028261096 |
| INNER EAR RECEPTOR STEREOCILUM ORGANIZATION                      | 15  | 0.109175574  | 0.612072976 |
| NEGATIVE REGULATION OF CATION TRANSMEMBRANE TRANSPORT            | 53  | -0.088131083 | 0.42328633  |
| REGULATION OF PHOSPHOLIPID METABOLIC PROCESS                     | 56  | -0.061415841 | 0.569241203 |
| NEGATIVE REGULATION OF CYTOPLASMIC TRANSPORT                     | 104 | -0.055067763 | 0.488261741 |
| POSITIVE REGULATION OF CELLULAR RESPONSE TO TRANSFORMING GROWTH  | 24  | 0.077085149  | 0.649741263 |
| FACTOR BETA STIMULUS                                             |     |              |             |
| AXON REGENERATION                                                | 24  | -0.124471689 | 0.442164399 |
| MICROTUBULE BASED PROCESS                                        | 452 | -0.053594349 | 0.165152767 |
| CALCIUM MEDIATED SIGNALING                                       | 78  | -0.16500371  | 0.061860284 |
| LOW DENSITY LIPOPROTEIN PARTICLE CLEARANCE                       | 11  | 0.618910604  | 0.009141259 |
| SPERM MOTILITY                                                   | 32  | 0.238135368  | 0.102186048 |
| NEGATIVE REGULATION OF SEQUENCE SPECIFIC DNA BINDING             | 124 | -0.039403964 | 0.58983195  |
| TRANSCRIPTION FACTOR ACTIVITY                                    |     |              |             |
| NEGATIVE REGULATION OF PROTEIN CATABOLIC PROCESS                 | 105 | -0.035951711 | 0.650896283 |
| CELLULAR AMINO ACID METABOLIC PROCESS                            | 293 | -0.070486391 | 0.137526742 |
| POSITIVE REGULATION OF DNA BINDING                               | 41  | 0.164722067  | 0.20821582  |
| NUCLEOTIDE TRANSPORT                                             | 23  | -0.286563408 | 0.067774105 |

|                                                                  |      |              |             |
|------------------------------------------------------------------|------|--------------|-------------|
| REGULATION OF HAIR FOLLICLE DEVELOPMENT                          | 14   | 0.464328253  | 0.020075042 |
| CRISTAE FORMATION                                                | 11   | 0.201095569  | 0.417954495 |
| SYNAPTIC VESICLE RECYCLING                                       | 21   | 0.110210746  | 0.5443309   |
| POSITIVE REGULATION OF NUCLEOSIDE METABOLIC PROCESS              | 21   | 0.213047236  | 0.245786134 |
| DORSAL VENTRAL PATTERN FORMATION                                 | 73   | 0.163030849  | 0.095891574 |
| REGULATION OF VITAMIN METABOLIC PROCESS                          | 10   | 0.153051065  | 0.562091623 |
| AEROBIC RESPIRATION                                              | 46   | -0.351670265 | 0.001049694 |
| CELLULAR RESPONSE TO INSULIN STIMULUS                            | 133  | -0.017908734 | 0.800765179 |
| SEQUESTERING OF METAL ION                                        | 10   | -0.066871945 | 0.792690814 |
| COPPER ION TRANSPORT                                             | 17   | -0.071097726 | 0.715624524 |
| MEMBRANE ASSEMBLY                                                | 23   | -0.235251771 | 0.13362178  |
| REGULATION OF DNA DAMAGE RESPONSE SIGNAL TRANSDUCTION BY P53     | 28   | -0.048952699 | 0.74887143  |
| CLASS MEDIATOR                                                   |      |              |             |
| LIPID DIGESTION                                                  | 15   | 0.456455002  | 0.022062312 |
| POSITIVE REGULATION OF CELLULAR COMPONENT ORGANIZATION           | 1026 | -0.007087216 | 0.788485184 |
| POSITIVE REGULATION OF G1 S TRANSITION OF MITOTIC CELL CYCLE     | 23   | -0.018871562 | 0.911600856 |
| POSITIVE REGULATION OF GENE EXPRESSION                           | 1541 | 0.003367495  | 0.878362779 |
| NEUROMUSCULAR PROCESS CONTROLLING BALANCE                        | 41   | 0.001392134  | 0.991320102 |
| ORGAN OR TISSUE SPECIFIC IMMUNE RESPONSE                         | 24   | -0.235910003 | 0.130143125 |
| REGULATION OF CARDIAC MUSCLE CONTRACTION BY REGULATION OF THE    |      |              |             |
| RELEASE OF SEQUESTERED CALCIUM ION                               | 18   | -0.40287061  | 0.013025868 |
| NEGATIVE REGULATION OF ORGANELLE ASSEMBLY                        | 20   | 0.020802726  | 0.909903119 |
| RESPONSE TO INTERFERON BETA                                      | 22   | -0.031641132 | 0.855065771 |
| REGULATION OF ORGAN FORMATION                                    | 29   | 0.044380619  | 0.772282719 |
| FOREBRAIN DEVELOPMENT                                            | 308  | 0.008651732  | 0.854496477 |
| RHODOPSIN MEDIATED SIGNALING PATHWAY                             | 8    | 0.142109738  | 0.629253538 |
| ACTIVATION OF CYSTEINE TYPE ENDOPEPTIDASE ACTIVITY               | 86   | -0.072763876 | 0.402658687 |
| REGULATION OF MESONEPHROS DEVELOPMENT                            | 23   | -0.159904004 | 0.32661338  |
| CARBOHYDRATE DERIVATIVE METABOLIC PROCESS                        | 908  | -0.07263802  | 0.00846517  |
| REGULATION OF CHROMATIN BINDING                                  | 15   | -0.211167651 | 0.28142146  |
| STEM CELL PROLIFERATION                                          | 55   | -0.069689755 | 0.521041687 |
| NAD METABOLIC PROCESS                                            | 47   | 0.108350165  | 0.373779172 |
| REGULATION OF EXTRACELLULAR MATRIX ASSEMBLY                      | 11   | 0.310019498  | 0.218313768 |
| PROTEIN LOCALIZATION TO LYSOSOME                                 | 20   | 0.216798181  | 0.25900969  |
| MRNA MODIFICATION                                                | 11   | 0.485002511  | 0.046331495 |
| SOMATIC DIVERSIFICATION OF IMMUNOGLOBULINS                       | 26   | -0.099887894 | 0.524358803 |
| ERBB2 SIGNALING PATHWAY                                          | 36   | 0.704729937  | 1.02E-09    |
| AMEBOIDAL TYPE CELL MIGRATION                                    | 139  | 0.011326169  | 0.871224809 |
| HEMATOPOIETIC STEM CELL DIFFERENTIATION                          | 11   | -0.357996617 | 0.107842463 |
| SPINAL CORD MOTOR NEURON DIFFERENTIATION                         | 26   | 0.018294589  | 0.909631188 |
| MONOCARBOXYLIC ACID METABOLIC PROCESS                            | 399  | 0.062585455  | 0.13587854  |
| CELLULAR RESPONSE TO TOPOLOGICALLY INCORRECT PROTEIN             | 113  | -0.17377013  | 0.0184978   |
| AMINOGLYCAN BIOSYNTHETIC PROCESS                                 | 95   | -0.151718416 | 0.060325956 |
| DICARBOXYLIC ACID METABOLIC PROCESS                              | 86   | -0.042872711 | 0.624379335 |
| NEGATIVE REGULATION OF ASTROCYTE DIFFERENTIATION                 | 12   | 0.062344299  | 0.794188709 |
| POSITIVE REGULATION OF PROTEASOMAL PROTEIN CATABOLIC PROCESS     | 91   | -0.029877545 | 0.726570345 |
| REGULATION OF ENERGY HOMEOSTASIS                                 | 14   | 0.178888466  | 0.41992228  |
| REGULATION OF MEMBRANE POTENTIAL                                 | 277  | 0.046249316  | 0.355399092 |
| POSITIVE REGULATION OF RELEASE OF CYTOCHROME C FROM MITOCHONDRIA | 27   | -0.020196871 | 0.897545439 |
| PEPTIDYL PROLINE HYDROXYLATION                                   | 11   | 0.577738535  | 0.016687096 |
| MULTICELLULAR ORGANISMAL RESPONSE TO STRESS                      | 52   | 0.067835886  | 0.55524685  |
| NEGATIVE REGULATION OF SMALL GTPASE MEDIATED SIGNAL              |      |              |             |
| TRANSDUCTION                                                     | 34   | -0.112805863 | 0.407386019 |
| ESTABLISHMENT OF LOCALIZATION BY MOVEMENT ALONG MICROTUBULE      | 89   | -0.05899336  | 0.491659514 |
| AMINO ACID BETAINE TRANSPORT                                     | 14   | 0.076029936  | 0.731785854 |
| AMMONIUM TRANSMEMBRANE TRANSPORT                                 | 19   | 0.035117639  | 0.85267256  |
| REGULATION OF GROWTH                                             | 565  | 0.055293718  | 0.11868743  |
| CATION TRANSPORT                                                 | 613  | 0.026472787  | 0.434895286 |
| GABAERGIC NEURON DIFFERENTIATION                                 | 9    | 0.234527704  | 0.408077416 |
| MACROAUTOPHAGY                                                   | 249  | -0.049251782 | 0.340665391 |
| FATTY ACID BETA OXIDATION USING ACYL COA DEHYDROGENASE           | 15   | 0.037367524  | 0.86063664  |
| MEMBRANE DOCKING                                                 | 64   | -0.069528608 | 0.490237288 |
| EXCITATORY POSTSYNAPTIC POTENTIAL                                | 22   | 0.112825473  | 0.524215599 |
| GLUTAMINE FAMILY AMINO ACID METABOLIC PROCESS                    | 60   | -0.12943659  | 0.204825318 |
| REGULATION OF NUCLEASE ACTIVITY                                  | 22   | -0.037360823 | 0.829043344 |
| RESPONSE TO INORGANIC SUBSTANCE                                  | 414  | -0.019943935 | 0.623212617 |

|                                                                                  |     |              |             |
|----------------------------------------------------------------------------------|-----|--------------|-------------|
| NEGATIVE REGULATION OF HISTONE ACETYLATION                                       | 14  | -0.0307695   | 0.887303615 |
| PHAGOLYSOSOME ASSEMBLY                                                           | 7   | 0.651750168  | 0.097373065 |
| MODULATION BY SYMBIONT OF HOST CELLULAR PROCESS                                  | 28  | 0.037852301  | 0.80815829  |
| REGULATION OF VESICLE MEDIATED TRANSPORT                                         | 387 | 0.022558561  | 0.59396464  |
| ORGANONITROGEN COMPOUND CATABOLIC PROCESS                                        | 290 | 0.006941151  | 0.886369114 |
| REGULATION OF ASTROCYTE DIFFERENTIATION                                          | 24  | 0.254382156  | 0.137296274 |
| REGULATION OF HYDROGEN PEROXIDE INDUCED CELL DEATH                               | 18  | -0.021110195 | 0.912457242 |
| ADP METABOLIC PROCESS                                                            | 43  | 0.058298887  | 0.644267344 |
| POSITIVE REGULATION OF CELL PROLIFERATION                                        | 704 | -0.003634358 | 0.908299214 |
| REGULATION OF SODIUM ION TRANSPORT                                               | 66  | 0.131234298  | 0.202490449 |
| POSITIVE REGULATION OF TUMOR NECROSIS FACTOR SUPERFAMILY CYTOKINE PRODUCTION     | 52  | -0.05030914  | 0.654090974 |
| NEGATIVE REGULATION OF G PROTEIN COUPLED RECEPTOR PROTEIN SIGNALING PATHWAY      | 34  | 0.051664913  | 0.715577913 |
| HISTONE DEUBIQUITINATION                                                         | 20  | 0.116583277  | 0.531152722 |
| GLUCOSAMINE CONTAINING COMPOUND METABOLIC PROCESS                                | 22  | 0.178497988  | 0.315651971 |
| ORGANIC ACID TRANSPORT                                                           | 212 | -0.023599268 | 0.675006999 |
| FOREBRAIN REGIONALIZATION                                                        | 18  | -0.132820441 | 0.474427488 |
| FOREBRAIN GENERATION OF NEURONS                                                  | 54  | 0.20425508   | 0.07334991  |
| CALCIUM DEPENDENT CELL CELL ADHESION VIA PLASMA MEMBRANE CELL ADHESION MOLECULES | 19  | 0.240050494  | 0.202371439 |
| PANCREAS DEVELOPMENT                                                             | 59  | 0.005415128  | 0.959573311 |
| LEUKOCYTE CHEMOTAXIS                                                             | 96  | 0.019510156  | 0.816519695 |
| GLUCOSE 6 PHOSPHATE METABOLIC PROCESS                                            | 21  | -0.006416141 | 0.971307162 |
| MITOCHONDRIAL TRANSMEMBRANE TRANSPORT                                            | 55  | -0.102847976 | 0.338745156 |
| NUCLEAR PORE ORGANIZATION                                                        | 15  | -0.356084496 | 0.055569357 |
| CELLULAR RESPONSE TO NITRIC OXIDE                                                | 12  | -0.188877182 | 0.398835842 |
| INTRA S DNA DAMAGE CHECKPOINT                                                    | 10  | 0.15733901   | 0.555646037 |
| REGULATION OF SYNAPSE STRUCTURE OR ACTIVITY                                      | 193 | 0.044822232  | 0.453320737 |
| HISTONE H3 K9 MODIFICATION                                                       | 12  | 0.024824333  | 0.916744763 |
| RESPONSE TO INTERFERON ALPHA                                                     | 18  | -0.33530036  | 0.053045719 |
| NEGATIVE REGULATION OF TRANSLATIONAL INITIATION                                  | 21  | -0.119484473 | 0.489925573 |
| REGULATION OF TOLL LIKE RECEPTOR SIGNALING PATHWAY                               | 42  | 0.120212368  | 0.35163019  |
| CARDIAC CONDUCTION SYSTEM DEVELOPMENT                                            | 10  | -0.123059806 | 0.623723017 |
| REGULATION OF GLOMERULAR FILTRATION                                              | 10  | -0.287387868 | 0.216572742 |
| REGULATION OF FATTY ACID METABOLIC PROCESS                                       | 73  | 0.02046913   | 0.831804445 |
| CYTOCHROME COMPLEX ASSEMBLY                                                      | 24  | -0.192521523 | 0.220413217 |
| RESPONSE TO METAL ION                                                            | 288 | -0.010526863 | 0.828379223 |
| CELL SUBSTRATE ADHESION                                                          | 146 | -0.038881391 | 0.564192392 |
| NEGATIVE REGULATION OF DEVELOPMENTAL GROWTH                                      | 78  | 0.030464365  | 0.744381968 |
| NEGATIVE REGULATION OF INTRACELLULAR SIGNAL TRANSDUCTION                         | 399 | -0.03782055  | 0.358220006 |
| ENDOCARDIAL CUSHION FORMATION                                                    | 15  | 0.176082632  | 0.410948546 |
| REGULATION OF NUCLEAR CELL CYCLE DNA REPLICATION                                 | 11  | -0.184207631 | 0.430990422 |
| ORGANIC HYDROXY COMPOUND TRANSPORT                                               | 110 | 0.032559693  | 0.679453955 |
| MITOCHONDRIAL CALCIUM ION HOMEOSTASIS                                            | 14  | -0.126597809 | 0.547027186 |
| REPLACEMENT OSSIFICATION                                                         | 22  | -0.153700916 | 0.356276091 |
| REGULATION OF ACTIN FILAMENT BASED PROCESS                                       | 280 | -0.014044131 | 0.775287478 |
| WOUND HEALING                                                                    | 407 | -0.045510115 | 0.263450584 |
| MITOTIC CELL CYCLE ARREST                                                        | 13  | -0.102892036 | 0.640841056 |
| HEXOSE CATABOLIC PROCESS                                                         | 41  | 0.024223746  | 0.850536011 |
| GLUTAMINE METABOLIC PROCESS                                                      | 23  | -0.22939081  | 0.153251502 |
| RESPONSE TO NERVE GROWTH FACTOR                                                  | 34  | 0.014082463  | 0.920369099 |
| NEGATIVE REGULATION OF TELOMERASE ACTIVITY                                       | 14  | -0.162634836 | 0.43366773  |
| RNA PROCESSING                                                                   | 791 | -0.121262715 | 3.12E-05    |
| REGULATION OF IRE1 MEDIATED UNFOLDED PROTEIN RESPONSE                            | 13  | -0.039804173 | 0.859496367 |
| POSITIVE REGULATION OF FATTY ACID BIOSYNTHETIC PROCESS                           | 13  | 0.092063454  | 0.689621971 |
| SYNAPTIC VESICLE CYCLE                                                           | 72  | 0.020562838  | 0.832191836 |
| NUCLEOBASE CONTAINING SMALL MOLECULE METABOLIC PROCESS                           | 473 | -0.103948487 | 0.005300491 |
| POSITIVE REGULATION OF INTERLEUKIN 1 SECRETION                                   | 18  | 0.114538116  | 0.558081764 |
| REGULATION OF CYTOKINE PRODUCTION INVOLVED IN IMMUNE RESPONSE                    | 50  | 0.098331186  | 0.402875631 |
| POSITIVE REGULATION OF LEUKOCYTE PROLIFERATION                                   | 115 | -0.093734482 | 0.210017795 |
| PSEUDOURIDINE SYNTHESIS                                                          | 16  | -0.242029211 | 0.199069844 |
| CELLULAR PROTEIN COMPLEX ASSEMBLY                                                | 309 | -0.028011828 | 0.548889534 |
| DEFENSE RESPONSE                                                                 | 917 | 0.029907078  | 0.285948839 |
| POLY A MRNA EXPORT FROM NUCLEUS                                                  | 11  | -0.292010122 | 0.19077971  |
| PHOSPHOLIPID BIOSYNTHETIC PROCESS                                                | 208 | -0.047589789 | 0.399484362 |

|                                                                            |     |              |             |
|----------------------------------------------------------------------------|-----|--------------|-------------|
| NEGATIVE REGULATION OF LEUKOCYTE APOPTOTIC PROCESS                         | 38  | 0.0025701    | 0.98457593  |
| POSITIVE REGULATION OF HYDROLASE ACTIVITY                                  | 776 | -0.020911819 | 0.486125547 |
| CELLULAR RESPONSE TO INTERLEUKIN 4                                         | 25  | 0.143094973  | 0.390393727 |
| PORPHYRIN CONTAINING COMPOUND METABOLIC PROCESS                            | 32  | -0.275082251 | 0.037664259 |
| SPERM CAPACITATION                                                         | 11  | 0.153833373  | 0.540099906 |
| POSITIVE REGULATION OF TELOMERASE ACTIVITY                                 | 26  | 0.305221345  | 0.062499949 |
| NEGATIVE REGULATION OF INTERLEUKIN 6 PRODUCTION                            | 27  | -0.025286554 | 0.871764178 |
| CELLULAR MONOVALENT INORGANIC CATION HOMEOSTASIS                           | 78  | 0.13581475   | 0.151393306 |
| RESPONSE TO METHYLMERCURY                                                  | 10  | -0.058560869 | 0.818367133 |
| REGULATION OF CENTRIOLE REPLICATION                                        | 12  | 0.102999928  | 0.669115399 |
| POSITIVE REGULATION OF MULTICELLULAR ORGANISMAL METABOLIC PROCESS          | 18  | -0.34574837  | 0.040674739 |
| REGULATION OF ACUTE INFLAMMATORY RESPONSE                                  | 60  | 0.068576887  | 0.522042974 |
| CYTOKINE PRODUCTION                                                        | 99  | -0.009788189 | 0.90533971  |
| TOLL LIKE RECEPTOR SIGNALING PATHWAY                                       | 77  | 0.006311814  | 0.946228708 |
| POSITIVE REGULATION OF INTRACELLULAR TRANSPORT                             | 320 | -0.05887251  | 0.196769359 |
| FOREBRAIN CELL MIGRATION                                                   | 56  | -0.007235218 | 0.947243185 |
| DEMETHYLATION                                                              | 47  | 0.047200498  | 0.695681358 |
| CELL MOTILITY                                                              | 713 | -0.006774867 | 0.828869093 |
| POSITIVE REGULATION OF ENDOTHELIAL CELL MIGRATION                          | 63  | 0.081710605  | 0.435517539 |
| DECIDUALIZATION                                                            | 19  | 0.247054542  | 0.198853374 |
| REGULATION OF MONONUCLEAR CELL MIGRATION                                   | 15  | 0.01823813   | 0.931476178 |
| CERAMIDE BIOSYNTHETIC PROCESS                                              | 37  | -0.087617103 | 0.505489792 |
| NEGATIVE REGULATION OF ORGAN GROWTH                                        | 20  | -0.233938575 | 0.167813339 |
| NEGATIVE REGULATION OF RESPONSE TO BIOTIC STIMULUS                         | 28  | -0.215830407 | 0.136144961 |
| ORGANOPHOSPHATE ESTER TRANSPORT                                            | 75  | 0.184276403  | 0.05813433  |
| MICROTUBULE CYTOSKELETON ORGANIZATION                                      | 305 | -0.023477017 | 0.61803234  |
| HISTONE MONOUBIQUITINATION                                                 | 23  | -0.093043681 | 0.577212563 |
| REGULATION OF CELL CYCLE G2 M PHASE TRANSITION                             | 57  | -0.020134543 | 0.852192392 |
| EMBRYONIC VISCEROCRANIUM MORPHOGENESIS                                     | 10  | 0.138175788  | 0.598818494 |
| SOMATIC CELL DNA RECOMBINATION                                             | 30  | -0.097172947 | 0.505985367 |
| PIGMENTATION                                                               | 75  | 0.061117486  | 0.523208854 |
| POSITIVE REGULATION OF PROTEIN LOCALIZATION TO CELL PERIPHERY              | 34  | 0.076580527  | 0.590598846 |
| POSITIVE REGULATION OF TRANSLATIONAL INITIATION                            | 20  | -0.251422959 | 0.141042189 |
| NEGATIVE REGULATION OF CELL AGING                                          | 17  | -0.083498612 | 0.668054434 |
| B CELL MEDIATED IMMUNITY                                                   | 54  | 0.109529503  | 0.334743413 |
| AORTA DEVELOPMENT                                                          | 38  | -0.056895493 | 0.664329354 |
| CELL DIFFERENTIATION INVOLVED IN EMBRYONIC PLACENTA DEVELOPMENT            | 25  | -0.031590562 | 0.845929064 |
| ASYMMETRIC CELL DIVISION                                                   | 12  | -0.07600914  | 0.74273809  |
| SPECIFICATION OF SYMMETRY                                                  | 97  | -0.042651266 | 0.605124346 |
| PROTEIN LOCALIZATION TO ENDOPLASMIC RETICULUM                              | 120 | -0.166364829 | 0.020219438 |
| BILE ACID BIOSYNTHETIC PROCESS                                             | 12  | 0.00313994   | 0.989402476 |
| NEGATIVE REGULATION OF COAGULATION                                         | 40  | 0.104081252  | 0.428327056 |
| HISTONE EXCHANGE                                                           | 50  | -0.167975547 | 0.126731222 |
| LIPID HOMEOSTASIS                                                          | 86  | 0.217200997  | 0.016206985 |
| CELLULAR RESPIRATION                                                       | 127 | -0.191401295 | 0.00541018  |
| NUCLEOTIDE EXCISION REPAIR DNA DAMAGE RECOGNITION                          | 23  | 0.390172382  | 0.021751528 |
| REGULATION OF ENDOTHELIAL CELL DEVELOPMENT                                 | 11  | 0.358882574  | 0.139013329 |
| B CELL DIFFERENTIATION                                                     | 71  | 0.02078306   | 0.831595243 |
| NEURAL PRECURSOR CELL PROLIFERATION                                        | 60  | 0.035545905  | 0.738715093 |
| NUCLEAR TRANSPORT                                                          | 327 | -0.052658602 | 0.244080824 |
| PEPTIDE METABOLIC PROCESS                                                  | 509 | -0.170386498 | 1.45E-06    |
| NEGATIVE REGULATION OF CELL SUBSTRATE ADHESION                             | 49  | -0.200858622 | 0.067522066 |
| REGULATION OF EPITHELIAL CELL DIFFERENTIATION                              | 104 | 0.106807579  | 0.192122701 |
| ENDOTHELIAL CELL MIGRATION                                                 | 52  | 0.001303642  | 0.99084938  |
| ORGANIC HYDROXY COMPOUND CATABOLIC PROCESS                                 | 62  | 0.070946469  | 0.500777306 |
| GLYCEROLIPID METABOLIC PROCESS                                             | 298 | 0.028428604  | 0.554740695 |
| PEPTIDYL AMINO ACID MODIFICATION                                           | 759 | -0.033422814 | 0.269442643 |
| SECRETION                                                                  | 483 | -0.042138489 | 0.26097894  |
| REGULATION OF SEQUESTERING OF TRIGLYCERIDE                                 | 10  | 0.360425262  | 0.151037216 |
| NEGATIVE REGULATION OF FIBROBLAST GROWTH FACTOR RECEPTOR SIGNALING PATHWAY | 11  | -0.167542091 | 0.475836472 |
| NEGATIVE REGULATION OF PROTEIN OLIGOMERIZATION                             | 10  | 0.350429368  | 0.167304804 |
| CELL ACTIVATION INVOLVED IN IMMUNE RESPONSE                                | 113 | -0.014187821 | 0.853818223 |
| POSITIVE REGULATION OF VASODILATION                                        | 23  | -0.135517386 | 0.408390613 |
| HOMOCYSTEINE METABOLIC PROCESS                                             | 10  | -0.064074116 | 0.801120144 |

|                                                                        |      |              |             |
|------------------------------------------------------------------------|------|--------------|-------------|
| NEGATIVE REGULATION OF HISTONE MODIFICATION                            | 34   | 0.08875439   | 0.533202887 |
| COFACTOR CATABOLIC PROCESS                                             | 15   | 0.161312334  | 0.457415164 |
| PYRIMIDINE CONTAINING COMPOUND CATABOLIC PROCESS                       | 28   | 0.038158336  | 0.806586216 |
| NEGATIVE REGULATION OF DNA BINDING                                     | 44   | 0.104172052  | 0.407126476 |
| VENTRAL SPINAL CORD DEVELOPMENT                                        | 34   | 0.152470487  | 0.288345937 |
| REGULATION OF CIRCADIAN RHYTHM                                         | 85   | -0.042237505 | 0.631733573 |
| ANION TRANSPORT                                                        | 409  | 0.046655961  | 0.259394933 |
| CELL CELL ADHESION                                                     | 499  | -0.002556586 | 0.94523899  |
| MORPHOGENESIS OF AN ENDOTHELIUM                                        | 15   | -0.039161313 | 0.851609106 |
| GUANOSINE CONTAINING COMPOUND METABOLIC PROCESS                        | 43   | -0.158131949 | 0.184693172 |
| POSITIVE REGULATION OF RELEASE OF SEQUESTERED CALCIUM ION INTO CYTOSOL | 33   | -0.265739838 | 0.043421048 |
| REGULATION OF CYCLIC NUCLEOTIDE METABOLIC PROCESS                      | 114  | 0.038204341  | 0.621891334 |
| CHONDROITIN SULFATE PROTEOGLYCAN BIOSYNTHETIC PROCESS                  | 28   | -0.068564045 | 0.652259711 |
| GLANDULAR EPITHELIAL CELL DEVELOPMENT                                  | 16   | -0.041185622 | 0.838972964 |
| RESPONSE TO MAGNESIUM ION                                              | 19   | -0.055278778 | 0.765428504 |
| CELLULAR RESPONSE TO ATP                                               | 12   | -0.36057926  | 0.075706692 |
| CHOLESTEROL EFFLUX                                                     | 21   | 0.437519403  | 0.010266011 |
| PROTEIN OLIGOMERIZATION                                                | 371  | 0.005299703  | 0.90201892  |
| BETA CATENIN DESTRUCTION COMPLEX DISASSEMBLY                           | 20   | -0.205723139 | 0.231712274 |
| INNER DYNEIN ARM ASSEMBLY                                              | 9    | 0.378259903  | 0.172726339 |
| REGULATION OF EPITHELIAL CELL PROLIFERATION                            | 250  | -0.027460599 | 0.596411513 |
| CHROMATIN ASSEMBLY OR DISASSEMBLY                                      | 151  | -0.085854053 | 0.18969232  |
| REGULATION OF NITRIC OXIDE SYNTHASE ACTIVITY                           | 42   | 0.264216578  | 0.039356915 |
| REGULATION OF ANDROGEN RECEPTOR SIGNALING PATHWAY                      | 20   | -0.175215665 | 0.314016993 |
| LEFT RIGHT PATTERN FORMATION                                           | 20   | 0.233988788  | 0.207509264 |
| REGULATION OF LIPID BIOSYNTHETIC PROCESS                               | 108  | 0.144264152  | 0.073509955 |
| RESPONSE TO XENOBIOTIC STIMULUS                                        | 80   | 0.048176813  | 0.602583948 |
| REGULATION OF MACROPHAGE DERIVED FOAM CELL DIFFERENTIATION             | 22   | 0.457811312  | 0.007798042 |
| EMBRYONIC DIGESTIVE TRACT MORPHOGENESIS                                | 15   | 0.17516356   | 0.413635673 |
| PLACENTA BLOOD VESSEL DEVELOPMENT                                      | 26   | 0.179573592  | 0.276130463 |
| POSITIVE REGULATION OF GUANYLATE CYCLASE ACTIVITY                      | 6    | 0.169748402  | 0.615120085 |
| MELANIN METABOLIC PROCESS                                              | 10   | 0.08503074   | 0.745545674 |
| POSITIVE REGULATION OF RESPONSE TO EXTERNAL STIMULUS                   | 249  | 0.015692542  | 0.764751903 |
| POSITIVE REGULATION OF CELL CYCLE G2 M PHASE TRANSITION                | 17   | -0.023599321 | 0.904867156 |
| REGULATION OF REMOVAL OF SUPEROXIDE RADICALS                           | 11   | -0.170339632 | 0.464491209 |
| NEGATIVE REGULATION OF STEM CELL PROLIFERATION                         | 16   | -0.09819034  | 0.622351541 |
| AGING                                                                  | 235  | -0.041093061 | 0.440560471 |
| REGULATION OF VACUOLAR TRANSPORT                                       | 29   | -0.048559305 | 0.746764724 |
| CELLULAR RESPONSE TO ELECTRICAL STIMULUS                               | 12   | -0.020223963 | 0.931459848 |
| REGULATION OF OXIDATIVE PHOSPHORYLATION                                | 15   | 0.067502186  | 0.752725095 |
| NEGATIVE REGULATION OF CHROMOSOME SEGREGATION                          | 27   | -0.218871181 | 0.134129708 |
| NEGATIVE REGULATION OF EXTRINSIC APOPTOTIC SIGNALING PATHWAY           | 92   | -0.095699869 | 0.251508053 |
| REGULATION OF BONE DEVELOPMENT                                         | 16   | -0.024672189 | 0.903478929 |
| POSITIVE REGULATION OF T CELL MEDIATED CYTOTOXICITY                    | 14   | -0.179537195 | 0.387339095 |
| REGULATION OF LEUKOCYTE MEDIATED CYTOTOXICITY                          | 44   | 0.00694258   | 0.955237159 |
| REGULATION OF CHOLESTEROL BIOSYNTHETIC PROCESS                         | 13   | 0.218568494  | 0.342009222 |
| POLYSACCHARIDE CATABOLIC PROCESS                                       | 23   | -0.035720082 | 0.832900121 |
| NEGATIVE REGULATION OF AUTOPHAGY                                       | 48   | -0.038981789 | 0.739399367 |
| INNER CELL MASS CELL PROLIFERATION                                     | 11   | -0.251262504 | 0.283636247 |
| POSITIVE REGULATION OF MRNA SPLICING VIA SPLICEOSOME                   | 13   | 0.041225639  | 0.857008029 |
| POSTTRANSCRIPTIONAL REGULATION OF GENE EXPRESSION                      | 423  | -0.07440546  | 0.060842977 |
| POSITIVE REGULATION OF DNA DEPENDENT DNA REPLICATION                   | 11   | -0.164939705 | 0.482697201 |
| STARTLE RESPONSE                                                       | 20   | 0.213571754  | 0.246631387 |
| MOTOR NEURON AXON GUIDANCE                                             | 26   | -0.109012848 | 0.484529029 |
| TRANSCRIPTION FROM RNA POLYMERASE II PROMOTER                          | 661  | 0.001369088  | 0.966446321 |
| PYRIMIDINE RIBONUCLEOSIDE CATABOLIC PROCESS                            | 8    | -0.080295401 | 0.776653011 |
| RESPONSE TO ENDOGENOUS STIMULUS                                        | 1247 | -0.007704652 | 0.749713144 |
| HYPOTHALAMUS DEVELOPMENT                                               | 17   | 0.207093935  | 0.303705574 |
| PATTERN RECOGNITION RECEPTOR SIGNALING PATHWAY                         | 98   | -0.044282065 | 0.589369479 |
| POSITIVE REGULATION OF MEIOTIC CELL CYCLE                              | 11   | 0.152942627  | 0.544512242 |
| LATERAL MESODERM DEVELOPMENT                                           | 10   | 0.188699723  | 0.474868633 |
| POSITIVE REGULATION OF CELL MATRIX ADHESION                            | 38   | -0.110794121 | 0.389457736 |
| EMBRYO DEVELOPMENT                                                     | 790  | -0.01254376  | 0.674041159 |
| REGULATION OF STRIATED MUSCLE CONTRACTION                              | 67   | -0.127055026 | 0.188773984 |
| REGULATION OF LEUKOCYTE DIFFERENTIATION                                | 203  | -0.033487093 | 0.559405778 |

|                                                                                |     |              |             |
|--------------------------------------------------------------------------------|-----|--------------|-------------|
| REGULATION OF TRANSCRIPTION ELONGATION FROM RNA POLYMERASE II PROMOTER         | 23  | -0.14500408  | 0.376858944 |
| WATER TRANSPORT                                                                | 11  | 0.027755149  | 0.910914735 |
| ESTABLISHMENT OF CELL POLARITY                                                 | 77  | -0.063061261 | 0.493415877 |
| BIOTIN METABOLIC PROCESS                                                       | 14  | 0.078677235  | 0.722418128 |
| STEM CELL DIVISION                                                             | 28  | 0.23131173   | 0.139724757 |
| REACTIVE OXYGEN SPECIES BIOSYNTHETIC PROCESS                                   | 20  | 0.174356953  | 0.347227377 |
| POSITIVE REGULATION OF NITRIC OXIDE SYNTHASE BIOSYNTHETIC PROCESS              | 12  | -0.03498787  | 0.881258746 |
| DIGESTIVE SYSTEM DEVELOPMENT                                                   | 129 | 0.017274481  | 0.811898188 |
| POSITIVE REGULATION OF STEROID BIOSYNTHETIC PROCESS                            | 11  | 0.166648437  | 0.504791946 |
| DNA CONFORMATION CHANGE                                                        | 239 | -0.049972253 | 0.343248365 |
| DETECTION OF MECHANICAL STIMULUS                                               | 31  | 0.178262809  | 0.236506256 |
| SEXUAL REPRODUCTION                                                            | 540 | 0.101363873  | 0.005440467 |
| EPIDERMAL CELL DIFFERENTIATION                                                 | 98  | 0.087597074  | 0.298498703 |
| SYNAPTONEMAL COMPLEX ORGANIZATION                                              | 15  | 0.594355307  | 0.000724665 |
| BASE EXCISION REPAIR                                                           | 37  | 0.029353362  | 0.828419857 |
| CELLULAR CARBOHYDRATE CATABOLIC PROCESS                                        | 29  | -0.092043943 | 0.535435032 |
| NEGATIVE REGULATION OF TYPE 2 IMMUNE RESPONSE                                  | 10  | 0.102898978  | 0.694823011 |
| REGULATION OF NUCLEOSIDE METABOLIC PROCESS                                     | 46  | 0.056751289  | 0.642143755 |
| TAXIS                                                                          | 394 | 0.093330704  | 0.027708541 |
| CITRULLINE METABOLIC PROCESS                                                   | 7   | -0.132156986 | 0.655820337 |
| NEGATIVE REGULATION OF AXON GUIDANCE                                           | 26  | 0.197034071  | 0.229525158 |
| ORGAN FORMATION                                                                | 31  | 0.201618213  | 0.176941068 |
| NEGATIVE REGULATION OF CALCIUM ION TRANSPORT INTO CYTOSOL                      | 16  | -0.150952039 | 0.438673541 |
| REGULATION OF CARDIAC MUSCLE CELL MEMBRANE REPOLARIZATION                      | 16  | -0.16118421  | 0.411928447 |
| RESPONSE TO GLUCAGON                                                           | 41  | 0.078793474  | 0.543241031 |
| NEGATIVE REGULATION OF TISSUE REMODELING                                       | 15  | -0.075943755 | 0.714458593 |
| MEMBRANE TUBULATION                                                            | 10  | 0.278754965  | 0.277563019 |
| EMBRYONIC PLACENTA DEVELOPMENT                                                 | 79  | 0.232444672  | 0.013714421 |
| SMALL MOLECULE BIOSYNTHETIC PROCESS                                            | 369 | -0.015228239 | 0.723077283 |
| ANATOMICAL STRUCTURE MATURATION                                                | 38  | -0.014145009 | 0.914950073 |
| REGULATION OF AMYLOID PRECURSOR PROTEIN CATABOLIC PROCESS                      | 9   | 0.719859417  | 0.000401398 |
| CELLULAR EXTRAVASATION                                                         | 25  | -0.159653122 | 0.304333231 |
| REGULATION OF TELOMERE MAINTENANCE                                             | 62  | -0.084867683 | 0.405465813 |
| REGULATION OF EXTRINSIC APOPTOTIC SIGNALING PATHWAY VIA DEATH DOMAIN RECEPTORS | 52  | -0.232169453 | 0.028413083 |
| NEGATIVE REGULATION OF WOUND HEALING                                           | 49  | 0.090841157  | 0.444058985 |
| REGULATION OF IMMUNOGLOBULIN PRODUCTION                                        | 40  | 0.029014069  | 0.823771144 |
| FATTY ACYL COA METABOLIC PROCESS                                               | 41  | 0.036993357  | 0.77407287  |
| NEGATIVE REGULATION OF MUSCLE CELL APOPTOTIC PROCESS                           | 27  | 0.085116396  | 0.594538663 |
| GPI ANCHOR METABOLIC PROCESS                                                   | 29  | -0.195107047 | 0.172306514 |
| POSITIVE REGULATION OF HISTONE DEACETYLATION                                   | 14  | -0.346089095 | 0.070368933 |
| BLOOD COAGULATION FIBRIN CLOT FORMATION                                        | 21  | 0.214618759  | 0.233057949 |
| POSITIVE REGULATION OF INSULIN SECRETION                                       | 53  | -0.073356034 | 0.506771432 |
| NEGATIVE REGULATION OF NEUROTRANSMITTER TRANSPORT                              | 14  | -0.202860127 | 0.325192645 |
| AMYLOID PRECURSOR PROTEIN METABOLIC PROCESS                                    | 10  | -0.0502927   | 0.844028306 |
| NUCLEIC ACID PHOSPHODIESTER BOND HYDROLYSIS                                    | 229 | 0.004545992  | 0.933551642 |
| CHEMICAL HOMEOSTASIS WITHIN A TISSUE                                           | 10  | 0.314127113  | 0.239323025 |
| REGULATION OF MYELOID CELL DIFFERENTIATION                                     | 164 | -0.04101535  | 0.519117213 |
| REGULATION OF RESPONSE TO EXTERNAL STIMULUS                                    | 789 | 0.008061972  | 0.787865631 |
| REGULATION OF RNA POLYMERASE II TRANSCRIPTIONAL PREINITIATION                  | 12  | -0.173155622 | 0.439380311 |
| COMPLEX ASSEMBLY                                                               |     |              |             |
| RETROGRADE PROTEIN TRANSPORT ER TO CYTOSOL                                     | 16  | -0.494978685 | 0.020459656 |
| EPITHELIAL CELL CELL ADHESION                                                  | 13  | -0.249931738 | 0.235016378 |
| REGULATION OF MITOCHONDRION ORGANIZATION                                       | 194 | -0.16811277  | 0.002864467 |
| POLYAMINE METABOLIC PROCESS                                                    | 13  | -0.31514516  | 0.114002046 |
| POSITIVE REGULATION OF MUSCLE CONTRACTION                                      | 37  | 0.000746746  | 0.995575754 |
| NEGATIVE REGULATION OF T CELL RECEPTOR SIGNALING PATHWAY                       | 16  | -0.130744071 | 0.509499096 |
| PTERIDINE CONTAINING COMPOUND BIOSYNTHETIC PROCESS                             | 18  | -0.00784511  | 0.967507343 |
| BLOOD VESSEL ENDOTHELIAL CELL MIGRATION                                        | 23  | -0.052665445 | 0.754780452 |
| POSITIVE REGULATION OF PROTEIN LOCALIZATION TO NUCLEUS                         | 116 | 0.04466426   | 0.561343233 |
| POSITIVE REGULATION OF BMP SIGNALING PATHWAY                                   | 28  | 0.023230416  | 0.881221475 |
| REGULATION OF INTERFERON GAMMA BIOSYNTHETIC PROCESS                            | 10  | 0.454805514  | 0.051944924 |
| PROXIMAL DISTAL PATTERN FORMATION                                              | 28  | -0.07518001  | 0.620677612 |
| STRIATED MUSCLE CONTRACTION                                                    | 79  | -0.038982871 | 0.669885948 |
| NEGATIVE REGULATION OF ANION TRANSPORT                                         | 28  | 0.102722127  | 0.513327335 |

|                                                                       |      |              |             |
|-----------------------------------------------------------------------|------|--------------|-------------|
| NEGATIVE REGULATION OF CD4 POSITIVE ALPHA BETA T CELL DIFFERENTIATION | 11   | -0.145645238 | 0.536127309 |
| ECTODERM DEVELOPMENT                                                  | 21   | 0.193768955  | 0.287840242 |
| HYALURONAN METABOLIC PROCESS                                          | 27   | 0.007332157  | 0.96294348  |
| LEUKOCYTE MIGRATION                                                   | 217  | -0.052087462 | 0.345891631 |
| NEGATIVE REGULATION OF INTRACELLULAR PROTEIN TRANSPORT                | 87   | -0.074957722 | 0.385446935 |
| MEIOSIS I                                                             | 73   | 0.050078141  | 0.605330943 |
| SENSORY PERCEPTION OF PAIN                                            | 58   | 0.231717602  | 0.033219237 |
| NEGATIVE REGULATION OF GENE EXPRESSION EPIGENETIC                     | 96   | -0.055741889 | 0.499986306 |
| ALDITOL METABOLIC PROCESS                                             | 15   | -0.134172846 | 0.508506034 |
| MITOCHONDRIAL ELECTRON TRANSPORT UBIQUINOL TO CYTOCHROME C            | 13   | -0.364152029 | 0.061380271 |
| REGULATION OF ANATOMICAL STRUCTURE SIZE                               | 413  | 0.048329131  | 0.240588048 |
| REGULATION OF CELL PROLIFERATION INVOLVED IN KIDNEY DEVELOPMENT       | 13   | -0.257009436 | 0.213061416 |
| POSITIVE REGULATION OF MITOCHONDRION ORGANIZATION                     | 146  | -0.124127397 | 0.059328759 |
| POSITIVE REGULATION OF CATALYTIC ACTIVITY                             | 1310 | -0.025880198 | 0.271589018 |
| POSITIVE REGULATION OF SIGNAL TRANSDUCTION BY P53 CLASS MEDIATOR      | 17   | -0.021835837 | 0.911982437 |
| PEPTIDYL LYSINE MODIFICATION                                          | 294  | -0.090947582 | 0.053830664 |
| METHYLATION DEPENDENT CHROMATIN SILENCING                             | 8    | -0.29389389  | 0.263881422 |
| REGULATION OF LIPOPROTEIN LIPASE ACTIVITY                             | 11   | -0.331832907 | 0.132575987 |
| HORMONE MEDIATED SIGNALING PATHWAY                                    | 134  | 0.126141801  | 0.081669922 |
| ANDROGEN BIOSYNTHETIC PROCESS                                         | 9    | -0.043547325 | 0.871803208 |
| NEGATIVE REGULATION OF PROTEIN BINDING                                | 74   | -0.071442195 | 0.445576644 |
| POSITIVE REGULATION OF OLIGODENDROCYTE DIFFERENTIATION                | 11   | -0.018485088 | 0.94003252  |
| AXONEMAL DYNEIN COMPLEX ASSEMBLY                                      | 14   | 0.364860722  | 0.093795561 |
| REGULATION OF LIPID METABOLIC PROCESS                                 | 242  | 0.052157045  | 0.329876483 |
| HEMIDESMOSOME ASSEMBLY                                                | 12   | -0.17383031  | 0.434955984 |
| MAST CELL ACTIVATION                                                  | 18   | -0.250560197 | 0.16003667  |
| RESPONSE TO EXTERNAL STIMULUS                                         | 1483 | 0.00563342   | 0.801351944 |
| PROTEIN IMPORT INTO NUCLEUS TRANSLOCATION                             | 23   | -0.02258517  | 0.89422275  |
| REGULATION OF ADENYLATE CYCLASE ACTIVITY                              | 49   | -0.048349771 | 0.675992664 |
| POSITIVE REGULATION OF LEUKOCYTE DIFFERENTIATION                      | 116  | -0.021758232 | 0.774285133 |
| MITOCHONDRIAL MEMBRANE ORGANIZATION                                   | 90   | -0.091674697 | 0.27762435  |
| POSITIVE REGULATION OF NEUTROPHIL MIGRATION                           | 25   | 0.333917624  | 0.042600614 |
| INTRA GOLGI VESICLE MEDIATED TRANSPORT                                | 40   | -0.150886237 | 0.226184904 |
| REGULATION OF SPINDLE CHECKPOINT                                      | 14   | -0.087387218 | 0.682830048 |
| POSITIVE REGULATION OF STRIATED MUSCLE CONTRACTION                    | 12   | 0.088706229  | 0.711079758 |
| ANATOMICAL STRUCTURE REGRESSION                                       | 9    | -0.075222533 | 0.77857464  |
| CEREBRAL CORTEX NEURON DIFFERENTIATION                                | 15   | -0.065141765 | 0.754258165 |
| OVARIAN FOLLICLE DEVELOPMENT                                          | 52   | -0.033042672 | 0.76949715  |
| REGULATION OF VENTRICULAR CARDIAC MUSCLE CELL ACTION POTENTIAL        | 11   | -0.134001122 | 0.573152121 |
| REGULATION OF MYOBLAST DIFFERENTIATION                                | 40   | 0.038648724  | 0.767122363 |
| GLUCAN METABOLIC PROCESS                                              | 53   | 0.062508997  | 0.583345996 |
| CARDIAC ATRIUM DEVELOPMENT                                            | 25   | 0.127033294  | 0.446294763 |
| NEGATIVE REGULATION OF CELLULAR RESPONSE TO GROWTH FACTOR STIMULUS    | 107  | 0.060663945  | 0.449857134 |
| FATTY ACID HOMEOSTASIS                                                | 11   | 0.212708602  | 0.399930165 |
| NUCLEOTIDE SUGAR METABOLIC PROCESS                                    | 32   | 0.122377382  | 0.406542197 |
| ENERGY DERIVATION BY OXIDATION OF ORGANIC COMPOUNDS                   | 192  | -0.112780933 | 0.050818245 |
| REGULATION OF PLATELET AGGREGATION                                    | 14   | -0.180721664 | 0.386421211 |
| POSITIVE REGULATION OF PROTEIN IMPORT INTO NUCLEUS TRANSLOCATION      | 12   | -0.27827758  | 0.19977685  |
| POSITIVE REGULATION OF CARDIAC MUSCLE CONTRACTION                     | 10   | 0.146642511  | 0.576786259 |
| REGULATION OF SUBSTRATE ADHESION DEPENDENT CELL SPREADING             | 41   | -0.03439582  | 0.786379486 |
| NEPHRIC DUCT DEVELOPMENT                                              | 14   | 0.061264918  | 0.781730072 |
| POST GOLGI VESICLE MEDIATED TRANSPORT                                 | 79   | -0.049783324 | 0.585310298 |
| ERROR FREE TRANSLATION SYNTHESIS                                      | 19   | 0.303324067  | 0.128096036 |
| EYE PHOTORECEPTOR CELL DIFFERENTIATION                                | 34   | 0.004798519  | 0.972773032 |
| RESPONSE TO TESTOSTERONE                                              | 30   | -0.383577122 | 0.003920892 |
| CENTRIOLE ASSEMBLY                                                    | 17   | -0.254971344 | 0.159982062 |
| REGULATION OF HEMOPOIESIS                                             | 279  | -0.041372556 | 0.398211753 |
| ATRIAL SEPTUM DEVELOPMENT                                             | 16   | 0.152729447  | 0.463364971 |
| DETECTION OF TEMPERATURE STIMULUS                                     | 11   | 0.575175837  | 0.007223548 |
| ION TRANSMEMBRANE TRANSPORT                                           | 631  | 0.017230717  | 0.605704633 |
| ENAMEL MINERALIZATION                                                 | 8    | 0.055018764  | 0.850670268 |
| POSITIVE REGULATION OF CALCIUM MEDIATED SIGNALING                     | 30   | -0.283990076 | 0.035704908 |
| NEURAL CREST CELL MIGRATION                                           | 45   | 0.060696841  | 0.623079283 |
| SPINAL CORD MOTOR NEURON CELL FATE SPECIFICATION                      | 9    | 0.212839879  | 0.446493302 |

|                                                                                 |      |              |             |
|---------------------------------------------------------------------------------|------|--------------|-------------|
| REGULATION OF GLYCOPROTEIN METABOLIC PROCESS                                    | 40   | -0.106456405 | 0.398075427 |
| INTRACELLULAR SIGNAL TRANSDUCTION                                               | 1383 | -0.016878481 | 0.463232271 |
| REGULATION OF BEHAVIOR                                                          | 41   | 0.030758782  | 0.811125558 |
| PYRIMIDINE NUCLEOTIDE METABOLIC PROCESS                                         | 43   | -0.183287821 | 0.120980933 |
| GLYCOLIPID CATABOLIC PROCESS                                                    | 9    | 0.244815309  | 0.371354504 |
| SYNAPTIC VESICLE ENDOCYTOSIS                                                    | 17   | 0.277705329  | 0.166219613 |
| POSITIVE REGULATION OF PROTEIN TYROSINE KINASE ACTIVITY                         | 32   | 0.175990596  | 0.238265562 |
| POSITIVE REGULATION OF HEART RATE                                               | 17   | 0.253782633  | 0.200601788 |
| PALATE DEVELOPMENT                                                              | 75   | 0.130821817  | 0.175591517 |
| INNATE IMMUNE RESPONSE ACTIVATING CELL SURFACE RECEPTOR SIGNALING PATHWAY       | 97   | -0.168608604 | 0.034235875 |
| PATTERNING OF BLOOD VESSELS                                                     | 30   | 0.036470035  | 0.808660173 |
| REGULATION OF HOMEOSTATIC PROCESS                                               | 381  | -0.03266262  | 0.438364159 |
| FATTY ACID BETA OXIDATION USING ACYL COA OXIDASE                                | 12   | -0.069294958 | 0.764993774 |
| POSITIVE REGULATION OF VASOCONSTRICTION                                         | 30   | 0.1241003    | 0.414141049 |
| GOLGI TO PLASMA MEMBRANE TRANSPORT                                              | 38   | -0.110688699 | 0.391656752 |
| PROTEIN TARGETING TO MEMBRANE                                                   | 153  | -0.109179296 | 0.091498167 |
| MITOTIC CELL CYCLE                                                              | 728  | -0.12588975  | 3.19E-05    |
| REGULATION OF FEEDING BEHAVIOR                                                  | 12   | 0.043675673  | 0.854482413 |
| REGULATION OF THYMOCYTE AGGREGATION                                             | 22   | -0.060135756 | 0.726524807 |
| PROTEIN COMPLEX BIOGENESIS                                                      | 999  | -0.038251717 | 0.150178428 |
| REGULATION OF MULTICELLULAR ORGANISM GROWTH                                     | 55   | 0.026967273  | 0.80822025  |
| REGULATION OF KIDNEY DEVELOPMENT                                                | 51   | 0.005373325  | 0.962691415 |
| MACROMOLECULAR COMPLEX DISASSEMBLY                                              | 167  | -0.148366008 | 0.01521501  |
| POSITIVE REGULATION OF CELLULAR COMPONENT BIOGENESIS                            | 359  | 0.038441625  | 0.38253657  |
| POSITIVE REGULATION OF MITOCHONDRIAL MEMBRANE PERMEABILITY                      | 18   | -0.031612529 | 0.868887385 |
| COMPLEMENT ACTIVATION                                                           | 30   | 0.321373827  | 0.029894991 |
| REGULATION OF CATECHOLAMINE SECRETION                                           | 34   | 0.150514946  | 0.292393597 |
| BONE DEVELOPMENT                                                                | 135  | -0.078098759 | 0.260090473 |
| NEGATIVE REGULATION OF INTRACELLULAR STEROID HORMONE RECEPTOR SIGNALING PATHWAY | 25   | 0.01371496   | 0.933437031 |
| DERMATAN SULFATE PROTEOGLYCAN METABOLIC PROCESS                                 | 16   | 0.034385704  | 0.86741606  |
| REGULATION OF BIOMINERAL TISSUE DEVELOPMENT                                     | 61   | -0.131987648 | 0.19194273  |
| REGULATION OF AMINE TRANSPORT                                                   | 58   | 0.209835951  | 0.054421077 |
| SMOOTH MUSCLE TISSUE DEVELOPMENT                                                | 16   | -0.710721636 | 7.04E-06    |
| NEGATIVE REGULATION OF HEMATOPOIETIC PROGENITOR CELL DIFFERENTIATION            | 22   | 0.134331802  | 0.448602564 |
| NEGATIVE REGULATION OF NUCLEOSIDE METABOLIC PROCESS                             | 18   | 0.144530643  | 0.461730642 |
| NEGATIVE REGULATION OF CATION CHANNEL ACTIVITY                                  | 28   | -0.205994221 | 0.154475641 |
| NCRNA PROCESSING                                                                | 370  | -0.130242525 | 0.001783783 |
| NEGATIVE REGULATION OF TRANSPORT                                                | 392  | -0.035216266 | 0.396603342 |
| THYMOCYTE AGGREGATION                                                           | 42   | 0.012046798  | 0.924265089 |
| LEYDIG CELL DIFFERENTIATION                                                     | 8    | -0.004545677 | 0.98745086  |
| AMINE METABOLIC PROCESS                                                         | 104  | 0.087424603  | 0.28420907  |
| DNA MODIFICATION                                                                | 64   | 0.043974164  | 0.670433507 |
| PROTEIN LOCALIZATION TO MEMBRANE                                                | 351  | 0.012156786  | 0.783708984 |
| RNA SURVEILLANCE                                                                | 14   | -0.219591068 | 0.280185222 |
| MITOTIC SPINDLE ASSEMBLY                                                        | 36   | -0.216311258 | 0.090537602 |
| REGULATION OF GRANULOCYTE DIFFERENTIATION                                       | 15   | 0.110437323  | 0.607220211 |
| RESPONSE TO ALKALOID                                                            | 115  | -0.063790961 | 0.397549768 |
| REGULATION OF MESENCHYMAL CELL PROLIFERATION                                    | 30   | -0.1201969   | 0.406544755 |
| MORPHOGENESIS OF AN EPITHELIAL FOLD                                             | 13   | -0.108436117 | 0.623467465 |
| AUTOPHAGY                                                                       | 357  | -0.024959658 | 0.566829466 |
| REGULATION OF CELL PROJECTION ORGANIZATION                                      | 498  | 0.034258845  | 0.361252592 |
| REGULATION OF ACTIN FILAMENT LENGTH                                             | 137  | 0.037959852  | 0.591459289 |
| REGULATION OF TRANSPORTER ACTIVITY                                              | 165  | -0.070561175 | 0.262450805 |
| EATING BEHAVIOR                                                                 | 23   | 0.247979864  | 0.147855384 |
| GLUTATHIONE DERIVATIVE METABOLIC PROCESS                                        | 17   | -0.076373832 | 0.694572072 |
| CELL JUNCTION ORGANIZATION                                                      | 166  | -0.158259432 | 0.009708427 |
| FOLIC ACID CONTAINING COMPOUND BIOSYNTHETIC PROCESS                             | 13   | 0.007888025  | 0.972323399 |
| EMBRYONIC HEART TUBE DEVELOPMENT                                                | 63   | -0.112022576 | 0.263750627 |
| SPHINGOID METABOLIC PROCESS                                                     | 12   | -0.224265651 | 0.304965117 |
| PROTEIN DESTABILIZATION                                                         | 32   | 0.010488777  | 0.94236706  |
| NEGATIVE REGULATION OF RESPONSE TO FOOD                                         | 12   | 0.206560718  | 0.386353774 |
| L AMINO ACID IMPORT                                                             | 10   | 0.067233961  | 0.797636738 |
| EAR DEVELOPMENT                                                                 | 156  | 0.029641646  | 0.654439476 |

|                                                                          |      |              |             |
|--------------------------------------------------------------------------|------|--------------|-------------|
| NEGATIVE REGULATION OF CELL MATRIX ADHESION                              | 27   | -0.1482123   | 0.324972875 |
| REGULATION OF MACROPHAGE CHEMOTAXIS                                      | 14   | 0.034663338  | 0.874901913 |
| LAGGING STRAND ELONGATION                                                | 11   | 0.206836464  | 0.414211223 |
| POSITIVE REGULATION OF SMOOTH MUSCLE CELL PROLIFERATION                  | 52   | -0.034276928 | 0.761085917 |
| MEMBRANE BUDDING                                                         | 109  | 0.014589997  | 0.853251127 |
| REGULATION OF SYNAPTIC PLASTICITY                                        | 118  | 0.014216978  | 0.851271057 |
| LONG TERM SYNAPTIC DEPRESSION                                            | 15   | -0.293322836 | 0.127252679 |
| GLYCOSYL CERAMIDE METABOLIC PROCESS                                      | 11   | 0.124496089  | 0.619918567 |
| CELLULAR RESPONSE TO RETINOIC ACID                                       | 57   | -0.068481608 | 0.52126545  |
| NCRNA TRANSCRIPTION                                                      | 88   | -0.102451902 | 0.229420441 |
| REGULATION OF INTERLEUKIN 1 BETA PRODUCTION                              | 34   | -0.125336256 | 0.355174225 |
| NEGATIVE REGULATION OF SMOOTH MUSCLE CELL MIGRATION                      | 16   | -0.02225148  | 0.912957509 |
| NEGATIVE REGULATION OF INTRINSIC APOPTOTIC SIGNALING PATHWAY             | 84   | -0.027287745 | 0.759014105 |
| LIPOXYGENASE PATHWAY                                                     | 9    | -0.071295374 | 0.789883657 |
| NEGATIVE REGULATION OF EPITHELIAL CELL APOPTOTIC PROCESS                 | 31   | -0.008173492 | 0.955601214 |
| VESICLE DOCKING INVOLVED IN EXOCYTOSIS                                   | 34   | -0.074811319 | 0.587225491 |
| CD4 POSITIVE ALPHA BETA T CELL ACTIVATION                                | 30   | 0.046673626  | 0.757092052 |
| ARTERY MORPHOGENESIS                                                     | 46   | 0.054405647  | 0.655821424 |
| NEGATIVE REGULATION OF DEFENSE RESPONSE TO VIRUS                         | 17   | -0.166233811 | 0.378402947 |
| POSITIVE REGULATION OF MOLECULAR FUNCTION                                | 1550 | -0.020221318 | 0.354903745 |
| POSITIVE REGULATION OF REGULATED SECRETORY PATHWAY                       | 40   | -0.149927624 | 0.225667647 |
| SPROUTING ANGIOGENESIS                                                   | 43   | 0.011536018  | 0.926604747 |
| LYMPHOCYTE ACTIVATION                                                    | 286  | -0.069371472 | 0.148875193 |
| METALLO SULFUR CLUSTER ASSEMBLY                                          | 16   | -0.052601606 | 0.794436406 |
| NEGATIVE REGULATION OF RETINOIC ACID RECEPTOR SIGNALING PATHWAY          | 15   | -0.027440342 | 0.89602464  |
| SPLICEOSOMAL TRI SNRNP COMPLEX ASSEMBLY                                  | 10   | -0.326860955 | 0.161163777 |
| REGULATION OF T CELL TOLERANCE INDUCTION                                 | 11   | 0.052661386  | 0.832550798 |
| POSITIVE REGULATION OF RESPONSE TO OXIDATIVE STRESS                      | 13   | 0.013182572  | 0.953813275 |
| PROTEIN TRIMERIZATION                                                    | 34   | -0.052740366 | 0.703667885 |
| REGULATION OF PEPTIDYL SERINE PHOSPHORYLATION                            | 98   | 0.020338212  | 0.806995179 |
| PROTEOGLYCAN METABOLIC PROCESS                                           | 75   | 0.031243962  | 0.742991918 |
| NITROGEN COMPOUND TRANSPORT                                              | 427  | -0.147975003 | 0.000134334 |
| DOPAMINE METABOLIC PROCESS                                               | 20   | 0.124857243  | 0.501589998 |
| DEFENSE RESPONSE TO OTHER ORGANISM                                       | 362  | -0.044763443 | 0.298844563 |
| POSITIVE REGULATION OF GLYCOGEN METABOLIC PROCESS                        | 14   | -0.185253301 | 0.370084279 |
| LEUKOCYTE PROLIFERATION                                                  | 69   | -0.146713206 | 0.121084016 |
| POSITIVE REGULATION OF MICROTUBULE POLYMERIZATION OR<br>DEPOLYMERIZATION | 20   | 0.071367321  | 0.700496689 |
| L ASCORBIC ACID METABOLIC PROCESS                                        | 11   | -0.236358175 | 0.297063518 |
| CEREBELLAR GRANULAR LAYER DEVELOPMENT                                    | 10   | -0.258999352 | 0.277847933 |
| REGULATION OF GENE EXPRESSION BY GENETIC IMPRINTING                      | 11   | 0.254304619  | 0.305584002 |
| ADHERENS JUNCTION ASSEMBLY                                               | 32   | -0.015685228 | 0.91341807  |
| SECRETORY GRANULE ORGANIZATION                                           | 23   | -0.121860633 | 0.45990593  |
| NEGATIVE REGULATION OF POTASSIUM ION TRANSPORT                           | 27   | -0.082721477 | 0.592157126 |
| POSITIVE REGULATION OF INTERLEUKIN 12 PRODUCTION                         | 26   | -0.051681866 | 0.744353715 |
| REGULATION OF T CELL APOPTOTIC PROCESS                                   | 29   | 0.018818448  | 0.901878058 |
| VESICLE FUSION TO PLASMA MEMBRANE                                        | 11   | -0.036712988 | 0.880714552 |
| VENTRICULAR CARDIAC MUSCLE TISSUE DEVELOPMENT                            | 41   | 0.040214711  | 0.755192195 |
| CELLULAR RESPONSE TO INTERFERON GAMMA                                    | 96   | 0.094300988  | 0.267913094 |
| NEGATIVE REGULATION OF HISTONE METHYLATION                               | 16   | 0.044871127  | 0.827873784 |
| REGULATION OF GLIAL CELL PROLIFERATION                                   | 21   | -0.294391879 | 0.067187982 |
| IN UTERO EMBRYONIC DEVELOPMENT                                           | 288  | 0.038749324  | 0.42942735  |
| NEGATIVE REGULATION OF BLOOD CIRCULATION                                 | 29   | -0.099536063 | 0.501089276 |
| ER NUCLEUS SIGNALING PATHWAY                                             | 33   | -0.303019301 | 0.018983039 |
| ETHANOL METABOLIC PROCESS                                                | 11   | 0.176201936  | 0.483382952 |
| DICARBOXYLIC ACID BIOSYNTHETIC PROCESS                                   | 13   | 0.04227758   | 0.853391245 |
| PROTEIN HETEROTRIMERIZATION                                              | 13   | -0.21952815  | 0.303116184 |
| VESICLE CYTOSKELETAL TRAFFICKING                                         | 38   | 0.06132602   | 0.648332015 |
| REGULATION OF TRANSCRIPTION FACTOR IMPORT INTO NUCLEUS                   | 87   | 0.153380515  | 0.087339041 |
| EPITHELIAL CILIMUM MOVEMENT                                              | 15   | -0.023942274 | 0.909291034 |
| NEGATIVE REGULATION OF MEIOTIC CELL CYCLE                                | 15   | -0.103131808 | 0.615438218 |
| MESENCHYMAL CELL DIFFERENTIATION                                         | 124  | 0.137195364  | 0.067827832 |
| NEGATIVE REGULATION OF DNA BIOSYNTHETIC PROCESS                          | 31   | -0.274778844 | 0.04084439  |
| SHORT CHAIN FATTY ACID METABOLIC PROCESS                                 | 10   | 0.177126658  | 0.500226779 |
| ATRIAL SEPTUM MORPHOGENESIS                                              | 12   | 0.415819776  | 0.062797936 |
| REGULATION OF SMALL GTPASE MEDIATED SIGNAL TRANSDUCTION                  | 240  | -0.02882243  | 0.585789183 |

|                                                                          |     |              |             |
|--------------------------------------------------------------------------|-----|--------------|-------------|
| CELLULAR RESPONSE TO GROWTH HORMONE STIMULUS                             | 17  | -0.303286125 | 0.089400344 |
| REGULATION OF INTERLEUKIN 2 BIOSYNTHETIC PROCESS                         | 16  | 0.096617814  | 0.643666128 |
| RNA MODIFICATION                                                         | 108 | -0.076583616 | 0.323458949 |
| CELLULAR COMPONENT ASSEMBLY INVOLVED IN MORPHOGENESIS                    | 207 | -0.008629151 | 0.879971288 |
| ORGANELLE FISSION                                                        | 447 | -0.056246167 | 0.147137996 |
| EMBRYONIC FORELIMB MORPHOGENESIS                                         | 29  | 0.052799759  | 0.730929448 |
| REGULATION OF FIBROBLAST APOPTOTIC PROCESS                               | 14  | 0.23430043   | 0.295352637 |
| NOSE DEVELOPMENT                                                         | 11  | 0.323859205  | 0.19289734  |
| CELL DIFFERENTIATION INVOLVED IN KIDNEY DEVELOPMENT                      | 30  | -0.088099634 | 0.54628923  |
| REGULATION OF TRANSCRIPTION FROM RNA POLYMERASE III PROMOTER             | 22  | 0.215740486  | 0.224934896 |
| MUSCLE STRUCTURE DEVELOPMENT                                             | 375 | -0.007408715 | 0.86228929  |
| NEGATIVE REGULATION OF CELL CYCLE PROCESS                                | 201 | -0.111774332 | 0.047912801 |
| RESPONSE TO INCREASED OXYGEN LEVELS                                      | 20  | 0.033839708  | 0.854305747 |
| REGULATION OF CHROMATIN SILENCING                                        | 19  | 0.020393151  | 0.913885399 |
| MACROMOLECULAR COMPLEX REMODELING                                        | 17  | 0.472247631  | 0.008264953 |
| RIBOSOMAL LARGE SUBUNIT ASSEMBLY                                         | 23  | -0.118600151 | 0.4722929   |
| MAINTENANCE OF LOCATION IN CELL                                          | 89  | -0.096349307 | 0.25697121  |
| CEREBELLAR CORTEX DEVELOPMENT                                            | 39  | -0.172718624 | 0.165036356 |
| REGULATION OF MICROTUBULE POLYMERIZATION                                 | 29  | 0.290371359  | 0.060485816 |
| REGULATION OF MESODERM DEVELOPMENT                                       | 12  | 0.127746663  | 0.594227409 |
| T HELPER 1 TYPE IMMUNE RESPONSE                                          | 17  | 0.126636401  | 0.529696563 |
| POSITIVE REGULATION OF TYPE 2 IMMUNE RESPONSE                            | 12  | 0.137107012  | 0.567713852 |
| PLASMA LIPOPROTEIN PARTICLE CLEARANCE                                    | 19  | 0.574031379  | 0.000967827 |
| CELLULAR RESPONSE TO OXYGEN LEVELS                                       | 134 | 0.111890742  | 0.121529372 |
| DNA CATABOLIC PROCESS                                                    | 23  | -0.184698871 | 0.252932331 |
| REGULATION OF INTRACELLULAR ESTROGEN RECEPTOR SIGNALING PATHWAY          | 24  | 0.038889579  | 0.817370522 |
| CELLULAR RESPONSE TO HORMONE STIMULUS                                    | 486 | 0.078092212  | 0.041175509 |
| RESPONSE TO PROSTAGLANDIN                                                | 30  | 0.341199752  | 0.020653026 |
| CELL FATE COMMITMENT INVOLVED IN FORMATION OF PRIMARY GERM LAYER         | 25  | -0.269357789 | 0.0705489   |
| DNA REPAIR                                                               | 441 | -0.011294764 | 0.774602525 |
| T CELL DIFFERENTIATION INVOLVED IN IMMUNE RESPONSE                       | 27  | 0.033968873  | 0.830489179 |
| INSULIN LIKE GROWTH FACTOR RECEPTOR SIGNALING PATHWAY                    | 14  | 0.128054918  | 0.565958454 |
| PROTEIN HETEROTETRAMERIZATION                                            | 35  | -0.159304405 | 0.227668026 |
| NEGATIVE REGULATION OF HEART CONTRACTION                                 | 17  | 0.006811755  | 0.972666473 |
| SUBSTRATE INDEPENDENT TELENCEPHALIC TANGENTIAL MIGRATION                 | 8   | 0.050277467  | 0.863384413 |
| SULFUR COMPOUND CATABOLIC PROCESS                                        | 34  | -0.014794839 | 0.915827905 |
| CHLORIDE TRANSPORT                                                       | 76  | 0.118159763  | 0.216915583 |
| MICROTUBULE DEPOLYMERIZATION                                             | 10  | -0.065292004 | 0.797578128 |
| PROTEIN POLYMERIZATION                                                   | 58  | -0.046340945 | 0.663337752 |
| CELLULAR RESPONSE TO CORTICOSTEROID STIMULUS                             | 50  | 0.235588777  | 0.047359858 |
| SIGNAL TRANSDUCTION IN RESPONSE TO DNA DAMAGE                            | 92  | -0.07671838  | 0.361073702 |
| COBALAMIN METABOLIC PROCESS                                              | 17  | 0.067224048  | 0.737723812 |
| NEGATIVE REGULATION OF SYSTEMIC ARTERIAL BLOOD PRESSURE                  | 10  | -0.045333105 | 0.859422288 |
| MUSCLE CONTRACTION                                                       | 183 | 0.00049659   | 0.993488263 |
| TELOMERE LOCALIZATION                                                    | 9   | -0.016469663 | 0.951672251 |
| TRANSITION METAL ION HOMEOSTASIS                                         | 91  | 0.122813104  | 0.161402246 |
| REGULATION OF ADHERENS JUNCTION ORGANIZATION                             | 48  | -0.100124022 | 0.384666943 |
| ENZYME LINKED RECEPTOR PROTEIN SIGNALING PATHWAY                         | 605 | 0.0069476    | 0.838046086 |
| PYRIMIDINE NUCLEOTIDE CATABOLIC PROCESS                                  | 12  | 0.019182087  | 0.935536961 |
| PROTEIN KINASE C ACTIVATING G PROTEIN COUPLED RECEPTOR SIGNALING PATHWAY | 26  | 0.21887316   | 0.179824018 |
| REGULATION OF DEFENSE RESPONSE TO VIRUS BY VIRUS                         | 26  | -0.108192435 | 0.488888991 |
| REGULATION OF RECEPTOR INTERNALIZATION                                   | 32  | -0.072422835 | 0.610192574 |
| REGULATION OF CALCIUM ION TRANSMEMBRANE TRANSPORT                        | 93  | -0.26764309  | 0.000610762 |
| PROTEIN LOCALIZATION TO CHROMOSOME CENTROMERIC REGION                    | 13  | -0.426374158 | 0.027580746 |
| RESPONSE TO BACTERIUM                                                    | 391 | 0.041614291  | 0.324615213 |
| REGULATION OF ANTIGEN PROCESSING AND PRESENTATION                        | 16  | -0.059349035 | 0.768324451 |
| VASOCONSTRICTION                                                         | 22  | 0.251585569  | 0.151128635 |
| REGULATION OF MITOCHONDRIAL TRANSLATION                                  | 11  | -0.256701753 | 0.254187088 |
| POSITIVE REGULATION OF LEUKOCYTE MIGRATION                               | 97  | -0.066812314 | 0.415007299 |
| CALCIUM ION IMPORT                                                       | 58  | -0.046610536 | 0.661356971 |
| CELL MATURATION                                                          | 97  | 0.05568016   | 0.508626691 |
| BEHAVIORAL RESPONSE TO PAIN                                              | 8   | 0.146241043  | 0.620448841 |
| REGULATION OF SECRETION                                                  | 562 | -0.017690875 | 0.613630217 |

|                                                                                 |     |              |             |
|---------------------------------------------------------------------------------|-----|--------------|-------------|
| CELLULAR RESPONSE TO TOXIC SUBSTANCE                                            | 22  | -0.134137331 | 0.423739937 |
| MODULATION OF TRANSCRIPTION IN OTHER ORGANISM INVOLVED IN SYMBIOTIC INTERACTION | 22  | 0.021134755  | 0.904028086 |
| APOPTOTIC SIGNALING PATHWAY                                                     | 263 | -0.039504283 | 0.433515032 |
| NEURAL NUCLEUS DEVELOPMENT                                                      | 58  | -0.20997683  | 0.038118867 |
| LYMPHOCYTE MEDIATED IMMUNITY                                                    | 92  | 0.111344611  | 0.200954851 |
| REGULATION OF HEART MORPHOGENESIS                                               | 25  | 0.086560761  | 0.602560576 |
| S ADENOSYLMETHIONINE METABOLIC PROCESS                                          | 16  | -0.048597043 | 0.810021283 |
| FC EPSILON RECEPTOR SIGNALING PATHWAY                                           | 116 | -0.129669125 | 0.078768759 |
| HIPPOCAMPUS DEVELOPMENT                                                         | 64  | 0.116907415  | 0.263950404 |
| REGULATION OF PROTEIN LOCALIZATION TO CELL SURFACE                              | 24  | -0.188331284 | 0.236399685 |
| RIBONUCLEOSIDE TRIPHOSPHATE BIOSYNTHETIC PROCESS                                | 44  | -0.322945936 | 0.003299771 |
| PRIMARY AMINO COMPOUND METABOLIC PROCESS                                        | 13  | -0.153630908 | 0.478389669 |
| POSITIVE REGULATION OF TELOMERE CAPPING                                         | 14  | 0.382354388  | 0.089603275 |
| NEGATIVE REGULATION OF AMINE TRANSPORT                                          | 21  | 0.210496335  | 0.24290163  |
| REGULATION OF CHROMOSOME SEGREGATION                                            | 82  | -0.135013357 | 0.121854832 |
| POSITIVE REGULATION OF INSULIN RECEPTOR SIGNALING PATHWAY                       | 10  | -0.076917863 | 0.761444581 |
| PONS DEVELOPMENT                                                                | 9   | -0.02528242  | 0.92570784  |
| PROTEIN K11 LINKED UBIQUITINATION                                               | 26  | -0.180380049 | 0.235766213 |
| DETECTION OF CHEMICAL STIMULUS INVOLVED IN SENSORY PERCEPTION OF TASTE          | 19  | 0.184462155  | 0.331360015 |
| REGULATION OF MESENCHYMAL CELL APOPTOTIC PROCESS                                | 8   | -0.044818995 | 0.875491641 |
| RESPONSE TO INACTIVITY                                                          | 10  | 0.212029832  | 0.420304911 |
| SPHINGOLIPID METABOLIC PROCESS                                                  | 124 | -0.032213433 | 0.659953925 |
| RESPONSE TO PAIN                                                                | 19  | 0.183896971  | 0.334750416 |
| PROTEIN ACETYLATION                                                             | 119 | 0.065418864  | 0.390716163 |
| POSITIVE REGULATION OF TRANSCRIPTION ELONGATION FROM RNA POLYMERASE II PROMOTER | 13  | -0.225367663 | 0.288895366 |
| REGULATION OF NUCLEOCYTOPLASMIC TRANSPORT                                       | 201 | -0.029425579 | 0.610111935 |
| NEGATIVE REGULATION OF CALCIUM ION IMPORT                                       | 22  | 0.113233815  | 0.52308464  |
| CELLULAR HORMONE METABOLIC PROCESS                                              | 79  | 0.095813477  | 0.305884131 |
| PTERIDINE CONTAINING COMPOUND METABOLIC PROCESS                                 | 31  | 0.010191252  | 0.944873599 |
| BONE REMODELING                                                                 | 31  | -0.080561089 | 0.576223641 |
| EMBRYONIC CAMERA TYPE EYE MORPHOGENESIS                                         | 19  | -0.051262091 | 0.782313051 |
| FORMATION OF TRANSLATION PREINITIATION COMPLEX                                  | 21  | -0.400115578 | 0.01230404  |
| CHEMOKINE MEDIATED SIGNALING PATHWAY                                            | 51  | 0.084307675  | 0.468213121 |
| POSITIVE REGULATION OF INTERFERON BETA PRODUCTION                               | 28  | -0.208305949 | 0.153530697 |
| NEGATIVE REGULATION OF LEUKOCYTE MIGRATION                                      | 27  | 0.220997579  | 0.169528674 |
| REGULATION OF PROTEIN SECRETION                                                 | 316 | -0.077220489 | 0.090824761 |
| REGULATION OF PEPTIDYL TYROSINE PHOSPHORYLATION                                 | 189 | 0.056435371  | 0.351108206 |
| REGULATION OF NATURAL KILLER CELL ACTIVATION                                    | 25  | -0.014987179 | 0.926824457 |
| RESPONSE TO INSULIN                                                             | 181 | -0.037286784 | 0.538734265 |
| POSITIVE REGULATION OF FILOPODIUM ASSEMBLY                                      | 23  | -0.089865786 | 0.590169878 |
| REGULATION OF MUSCLE CELL APOPTOTIC PROCESS                                     | 39  | -0.009876919 | 0.939841198 |
| POSITIVE REGULATION OF NIK NF KAPPAB SIGNALING                                  | 27  | 0.002095313  | 0.989395167 |
| REGULATION OF CATABOLIC PROCESS                                                 | 677 | -0.034785599 | 0.276145934 |
| REGULATION OF CARBOHYDRATE METABOLIC PROCESS                                    | 146 | -0.026812264 | 0.691731423 |
| NEGATIVE REGULATION OF SYNAPTIC TRANSMISSION                                    | 53  | -0.049663212 | 0.655310917 |
| NEGATIVE REGULATION OF CYTOKINE BIOSYNTHETIC PROCESS                            | 19  | 0.038189296  | 0.840012704 |
| ROSTROCAUDAL NEURAL TUBE PATTERNING                                             | 11  | -0.183784536 | 0.430251267 |
| B CELL ACTIVATION                                                               | 112 | -0.082759869 | 0.276570195 |
| CELL DEATH IN RESPONSE TO OXIDATIVE STRESS                                      | 17  | -0.265851011 | 0.138656947 |
| REGULATION OF NEURON DIFFERENTIATION                                            | 483 | 0.017171286  | 0.651021695 |
| NEGATIVE REGULATION OF INTERFERON GAMMA PRODUCTION                              | 24  | 0.280958531  | 0.092497421 |
| REGULATION OF FIBRINOLYSIS                                                      | 12  | 0.224433439  | 0.347160979 |
| NEGATIVE REGULATION OF NF KAPPAB TRANSCRIPTION FACTOR ACTIVITY                  | 61  | -0.055144676 | 0.594320326 |
| PROTEIN POLYUBIQUITINATION                                                      | 229 | -0.07559515  | 0.157703148 |
| RIBONUCLEOPROTEIN COMPLEX LOCALIZATION                                          | 113 | -0.244974635 | 0.000726561 |
| REGULATION OF MRNA 3 END PROCESSING                                             | 28  | -0.097661489 | 0.517704835 |
| REGULATION OF PEPTIDE TRANSPORT                                                 | 219 | -0.011571598 | 0.834967924 |
| POSITIVE REGULATION OF ION TRANSPORT                                            | 198 | -0.054338332 | 0.346959087 |
| ATP BIOSYNTHETIC PROCESS                                                        | 31  | -0.229213023 | 0.091209199 |
| CANONICAL WNT SIGNALING PATHWAY                                                 | 86  | -0.021202798 | 0.809689942 |
| ACUTE INFLAMMATORY RESPONSE                                                     | 57  | 0.021767306  | 0.841776772 |
| NUCLEOBASE METABOLIC PROCESS                                                    | 37  | -0.113922487 | 0.382711473 |
| HUMORAL IMMUNE RESPONSE                                                         | 108 | 0.109708036  | 0.17165668  |

|                                                                    |     |              |             |
|--------------------------------------------------------------------|-----|--------------|-------------|
| NEGATIVE REGULATION OF INTERLEUKIN 10 PRODUCTION                   | 11  | 0.213887905  | 0.393581446 |
| PHAGOSOME MATURATION                                               | 32  | 0.242988665  | 0.103021203 |
| REGULATION OF CELLULAR RESPONSE TO HYPOXIA                         | 11  | 0.017381694  | 0.944035908 |
| REGULATION OF FEMALE GONAD DEVELOPMENT                             | 9   | -0.082676889 | 0.757051777 |
| REGULATION OF THYMOCYTE APOPTOTIC PROCESS                          | 12  | -0.164100521 | 0.465616999 |
| CHROMATIN MODIFICATION                                             | 497 | -0.046202703 | 0.211178387 |
| MYELOID LEUKOCYTE ACTIVATION                                       | 85  | -0.075711297 | 0.385983542 |
| REACTIVE NITROGEN SPECIES METABOLIC PROCESS                        | 17  | 0.138367939  | 0.492134306 |
| ANTERIOR POSTERIOR PATTERN SPECIFICATION                           | 173 | -0.089371413 | 0.143933884 |
| POSITIVE REGULATION OF CELL DIVISION                               | 107 | -0.035824361 | 0.649010409 |
| EYELID DEVELOPMENT IN CAMERA TYPE EYE                              | 12  | -0.274454198 | 0.215544623 |
| PIGMENT BIOSYNTHETIC PROCESS                                       | 41  | -0.143172895 | 0.243542764 |
| ERBB SIGNALING PATHWAY                                             | 75  | 0.18201487   | 0.062824419 |
| EMBRYONIC ORGAN MORPHOGENESIS                                      | 239 | -0.015729013 | 0.767301597 |
| REPRODUCTIVE SYSTEM DEVELOPMENT                                    | 344 | 0.114890212  | 0.011490018 |
| CYTOSOLIC CALCIUM ION TRANSPORT                                    | 48  | -0.122941439 | 0.281623291 |
| REGULATION OF SPINDLE ORGANIZATION                                 | 19  | 0.238757631  | 0.208258785 |
| POSITIVE REGULATION OF CATABOLIC PROCESS                           | 365 | -0.028582833 | 0.50701299  |
| PHOSPHOLIPID SCRAMBLING                                            | 10  | 0.52930251   | 0.019113139 |
| GLIOGENESIS                                                        | 156 | 0.108461559  | 0.105554998 |
| PEPTIDYL THREONINE MODIFICATION                                    | 46  | -0.318814528 | 0.003177106 |
| MITOCHONDRIAL FISSION                                              | 13  | -0.400289801 | 0.037526058 |
| MATURATION OF 5 8S RRNA FROM TRICISTRONIC RRNA TRANSCRIPT SSU RRNA | 19  | -0.11204562  | 0.537675482 |
| 5 8S RRNA LSU RRNA                                                 |     |              |             |
| NEGATIVE REGULATION OF SPROUTING ANGIOGENESIS                      | 11  | -0.285529686 | 0.19620733  |
| POLYOL TRANSPORT                                                   | 11  | -0.065172195 | 0.788137217 |
| REGULATION OF CARDIAC MUSCLE CONTRACTION BY CALCIUM ION            |     |              |             |
| SIGNALING                                                          | 22  | -0.404570523 | 0.005995067 |
| ANTIGEN PROCESSING AND PRESENTATION                                | 188 | -0.068642418 | 0.245018654 |
| CELLULAR AMINO ACID CATABOLIC PROCESS                              | 96  | 0.016193912  | 0.847189514 |
| TELENCEPHALON GLIAL CELL MIGRATION                                 | 20  | -0.10764077  | 0.545177254 |
| MAINTENANCE OF LOCATION                                            | 129 | -0.052520124 | 0.462361792 |
| NEPHRON EPITHELIUM DEVELOPMENT                                     | 78  | -0.068913183 | 0.4503061   |
| NEGATIVE REGULATION OF RECEPTOR ACTIVITY                           | 27  | -0.080704796 | 0.600635228 |
| KERATINOCYTE DIFFERENTIATION                                       | 66  | 0.213371008  | 0.03990122  |
| REGULATION OF NITRIC OXIDE SYNTHASE BIOSYNTHETIC PROCESS           | 17  | 0.02859822   | 0.886081681 |
| POSITIVE REGULATION OF CALCIUM ION TRANSMEMBRANE TRANSPORT         | 49  | -0.341856949 | 0.001131007 |
| NEGATIVE REGULATION OF EPITHELIAL CELL MIGRATION                   | 48  | 0.020703037  | 0.861608681 |
| POSITIVE REGULATION OF SYNAPSE MATURATION                          | 11  | 0.147063805  | 0.556976354 |
| PERIPHERAL NERVOUS SYSTEM NEURON DIFFERENTIATION                   | 12  | -0.011416419 | 0.961358127 |
| CELL REDOX HOMEOSTASIS                                             | 56  | -0.267902015 | 0.00816158  |
| POSITIVE REGULATION OF SMOOTH MUSCLE CONTRACTION                   | 26  | -0.022605985 | 0.887472564 |
| NEGATIVE REGULATION OF GLIAL CELL PROLIFERATION                    | 11  | -0.175045294 | 0.450956364 |
| POSITIVE REGULATION OF PROTEIN SECRETION                           | 166 | -0.001367194 | 0.982909746 |
| POSITIVE REGULATION OF CYTOSKELETON ORGANIZATION                   | 157 | 0.12411076   | 0.063356531 |
| REGULATION OF STEROID HORMONE SECRETION                            | 11  | 0.194537747  | 0.435983097 |
| RESPONSE TO KETONE                                                 | 155 | -0.008365625 | 0.899024701 |
| NEGATIVE REGULATION OF PROTEIN KINASE B SIGNALING                  | 34  | -0.068675284 | 0.61879052  |
| LYMPHANGIOGENESIS                                                  | 10  | 0.156662584  | 0.55336283  |
| REGULATION OF POSTSYNAPTIC MEMBRANE POTENTIAL                      | 44  | 0.032996834  | 0.790640854 |
| POSITIVE REGULATION OF TOLL LIKE RECEPTOR SIGNALING PATHWAY        | 16  | 0.246624639  | 0.230247155 |
| SENSORY PERCEPTION OF TASTE                                        | 33  | 0.251820737  | 0.078611442 |
| FEAR RESPONSE                                                      | 25  | 0.126052823  | 0.449306186 |
| REGULATION OF CLATHRIN MEDIATED ENDOCYTOSIS                        | 14  | 0.607177488  | 0.002933952 |
| REGULATION OF ENDOTHELIAL CELL MIGRATION                           | 104 | 0.003348335  | 0.9668425   |
| LABYRINTHINE LAYER BLOOD VESSEL DEVELOPMENT                        | 16  | 0.422132191  | 0.029355064 |
| NEURON NEURON SYNAPTIC TRANSMISSION                                | 43  | -0.163611578 | 0.169221279 |
| INNER MITOCHONDRIAL MEMBRANE ORGANIZATION                          | 17  | 0.105712147  | 0.599526101 |
| CILIUM MORPHOGENESIS                                               | 178 | 0.006727063  | 0.913271141 |
| ENERGY COUPLED PROTON TRANSPORT DOWN ELECTROCHEMICAL GRADIENT      | 21  | -0.205770932 | 0.217102762 |
| POSITIVE REGULATION OF PHOSPHOPROTEIN PHOSPHATASE ACTIVITY         | 15  | 0.029066032  | 0.891235845 |
| CELLULAR MODIFIED AMINO ACID BIOSYNTHETIC PROCESS                  | 43  | 0.051136569  | 0.685044918 |
| PROTEIN LOCALIZATION TO VACUOLE                                    | 45  | 0.101745256  | 0.414411605 |
| METANEPHRIC RENAL VESICLE MORPHOGENESIS                            | 9   | -0.101577531 | 0.702292552 |
| NEGATIVE REGULATION OF RHO PROTEIN SIGNAL TRANSDUCTION             | 12  | -0.102521099 | 0.655125137 |
| CELLULAR RESPONSE TO HYDROGEN PEROXIDE                             | 56  | -0.126117862 | 0.234199477 |

|                                                                                        |      |              |             |
|----------------------------------------------------------------------------------------|------|--------------|-------------|
| REGULATION OF ORGAN GROWTH                                                             | 68   | 0.006258452  | 0.949875492 |
| REGULATION OF SYNAPSE ASSEMBLY                                                         | 61   | 0.044165805  | 0.676437721 |
| NEGATIVE REGULATION OF NEUROTRANSMITTER SECRETION                                      | 10   | -0.203485879 | 0.405209448 |
| POSITIVE REGULATION OF CELL GROWTH                                                     | 136  | -0.111468544 | 0.103892517 |
| NEGATIVE REGULATION OF OXIDOREDUCTASE ACTIVITY                                         | 18   | 0.383058061  | 0.037589945 |
| EMBRYONIC DIGESTIVE TRACT DEVELOPMENT                                                  | 30   | 0.156156434  | 0.30449614  |
| PROTEIN O LINKED MANNOSYLATION                                                         | 16   | -0.191936638 | 0.31664201  |
| GUANOSINE CONTAINING COMPOUND BIOSYNTHETIC PROCESS                                     | 13   | -0.177032694 | 0.410379446 |
| BONE MINERALIZATION                                                                    | 28   | 0.016953432  | 0.913057387 |
| REGULATION OF TRANSMEMBRANE RECEPTOR PROTEIN SERINE THREONINE KINASE SIGNALING PATHWAY | 179  | 0.153927224  | 0.014455219 |
| CELLULAR RESPONSE TO ORGANIC SUBSTANCE                                                 | 1598 | -0.024520253 | 0.25520396  |
| OVULATION CYCLE PROCESS                                                                | 74   | 0.001577541  | 0.986801213 |
| POSITIVE REGULATION OF CELL ADHESION                                                   | 329  | -0.050452002 | 0.263092039 |
| PROTEIN LOCALIZATION TO CHROMATIN                                                      | 13   | -0.203448125 | 0.334449102 |
| PROTEIN O LINKED FUCOSYLATION                                                          | 9    | 0.111964146  | 0.686395853 |
| CEREBRAL CORTEX DEVELOPMENT                                                            | 96   | -0.023116173 | 0.78146285  |
| ENDOCRINE PANCREAS DEVELOPMENT                                                         | 32   | 0.064680601  | 0.658950602 |
| REGULATION OF INTERLEUKIN 8 PRODUCTION                                                 | 48   | -0.075008788 | 0.517893203 |
| RNA PHOSPHODIESTER BOND HYDROLYSIS                                                     | 109  | 0.027748588  | 0.725649858 |
| ORGANIC ACID METABOLIC PROCESS                                                         | 786  | -0.042641101 | 0.151182505 |
| REGULATION OF EXCRETION                                                                | 20   | 0.19731582   | 0.288844036 |
| AROMATIC AMINO ACID FAMILY METABOLIC PROCESS                                           | 25   | 0.175205803  | 0.29076539  |
| CYCLIC NUCLEOTIDE MEDIATED SIGNALING                                                   | 39   | -0.088905774 | 0.487399961 |
| POSITIVE REGULATION OF PHOSPHOLIPID METABOLIC PROCESS                                  | 38   | -0.215423229 | 0.083087484 |
| REGULATION OF ENDOCRINE PROCESS                                                        | 32   | 0.151900864  | 0.302058869 |
| RESPONSE TO INSECTICIDE                                                                | 9    | 0.337547785  | 0.20390858  |
| REGULATION OF NUCLEAR TRANSCRIBED MRNA POLY A TAIL SHORTENING                          | 11   | 0.143412305  | 0.569659319 |
| QUATERNARY AMMONIUM GROUP TRANSPORT                                                    | 17   | 0.144949063  | 0.475303563 |
| EXIT FROM MITOSIS                                                                      | 12   | 0.10227175   | 0.669701951 |
| REGULATION OF SYMBIOSIS ENCOMPASSING MUTUALISM THROUGH PARASITISM                      | 188  | 0.119834792  | 0.050283209 |
| RESPONSE TO GROWTH HORMONE                                                             | 27   | -0.031850287 | 0.838642504 |
| PROTEIN DEMANNOSYLATION                                                                | 12   | -0.423262616 | 0.044642645 |
| G1 DNA DAMAGE CHECKPOINT                                                               | 70   | -0.072223374 | 0.453606304 |
| POSITIVE REGULATION OF PRI MIRNA TRANSCRIPTION FROM RNA POLYMERASE II PROMOTER         | 11   | -0.522785274 | 0.010356843 |
| RESPONSE TO OXYGEN LEVELS                                                              | 282  | -0.037474388 | 0.442239482 |
| POSITIVE REGULATION OF IMMUNE SYSTEM PROCESS                                           | 706  | -0.040551533 | 0.194701619 |
| PHOTOTRANSDUCTION VISIBLE LIGHT                                                        | 12   | -0.106304311 | 0.64381288  |
| CELL COMMUNICATION INVOLVED IN CARDIAC CONDUCTION                                      | 35   | -0.027660531 | 0.840632586 |
| PROTEIN LOCALIZATION TO CHROMOSOME TELOMERIC REGION                                    | 13   | -0.277873015 | 0.169877533 |
| POSITIVE REGULATION OF CALCIUM ION TRANSMEMBRANE TRANSPORTER ACTIVITY                  | 26   | -0.550499336 | 1.96E-05    |
| REGULATION OF RECEPTOR MEDIATED ENDOCYTOSIS                                            | 66   | 0.052516091  | 0.606489291 |
| POSITIVE REGULATION OF LYMPHOCYTE MEDIATED IMMUNITY                                    | 58   | -0.109842853 | 0.2929088   |
| POSITIVE REGULATION OF BIOMINERAL TISSUE DEVELOPMENT                                   | 31   | -0.1592306   | 0.256172486 |
| RESPONSE TO TRANSFORMING GROWTH FACTOR BETA                                            | 131  | -0.043903459 | 0.536686084 |
| N ACETYLGUCOSAMINE METABOLIC PROCESS                                                   | 14   | 0.107694717  | 0.62859535  |
| TRANSCRIPTION ELONGATION FROM RNA POLYMERASE II PROMOTER                               | 78   | -0.060136747 | 0.511116953 |
| OXIDATIVE PHOSPHORYLATION                                                              | 80   | -0.247098188 | 0.003309611 |
| APOPTOTIC NUCLEAR CHANGES                                                              | 23   | 0.026590042  | 0.876884981 |
| REGULATION OF RAC PROTEIN SIGNAL TRANSDUCTION                                          | 12   | 0.079389717  | 0.740896309 |
| CELLULAR AMIDE METABOLIC PROCESS                                                       | 645  | -0.147433554 | 3.55E-06    |
| PARENTAL BEHAVIOR                                                                      | 10   | -0.429021515 | 0.047251134 |
| REGULATION OF DNA BINDING                                                              | 89   | 0.103813875  | 0.241023015 |
| IMMUNOGLOBULIN PRODUCTION                                                              | 38   | 0.016942127  | 0.898897597 |
| REGULATION OF TRANSFORMING GROWTH FACTOR BETA PRODUCTION                               | 23   | -0.025183075 | 0.882036297 |
| TISSUE MIGRATION                                                                       | 75   | -0.052802671 | 0.572177873 |
| ONE CARBON COMPOUND TRANSPORT                                                          | 6    | 0.358928673  | 0.262619733 |
| LEFT RIGHT AXIS SPECIFICATION                                                          | 12   | 0.357479089  | 0.126701799 |
| RESPONSE TO ISCHEMIA                                                                   | 27   | 0.039299836  | 0.804533377 |
| ENSHEATHMENT OF NEURONS                                                                | 80   | 0.071196928  | 0.443368118 |
| POSITIVE REGULATION OF MAST CELL ACTIVATION INVOLVED IN IMMUNE RESPONSE                | 10   | 0.071653068  | 0.784265318 |
| POSITIVE REGULATION OF PHOSPHORUS METABOLIC PROCESS                                    | 871  | 0.013014553  | 0.649344553 |

|                                                                                          |     |              |             |
|------------------------------------------------------------------------------------------|-----|--------------|-------------|
| CHROMATIN DISASSEMBLY                                                                    | 14  | -0.031403412 | 0.88505035  |
| PLATELET MORPHOGENESIS                                                                   | 17  | -0.298064341 | 0.099285151 |
| DENDRITE MORPHOGENESIS                                                                   | 38  | -0.069686888 | 0.593853478 |
| RESPONSE TO AMPHETAMINE                                                                  | 24  | -0.034287624 | 0.836119865 |
| RESPONSE TO CAMP                                                                         | 87  | 0.009027685  | 0.918404008 |
| MYOBLAST DIFFERENTIATION                                                                 | 32  | 0.071126243  | 0.628047995 |
| POSITIVE REGULATION OF ACTIN NUCLEATION                                                  | 15  | 0.439703392  | 0.033409587 |
| REGULATION OF MEGAKARYOCYTE DIFFERENTIATION                                              | 25  | 0.302442045  | 0.06105583  |
| NEGATIVE REGULATION OF HEMOPOIESIS                                                       | 114 | -0.068933356 | 0.36192616  |
| REGULATION OF MUSCLE CELL DIFFERENTIATION                                                | 134 | 0.021765781  | 0.7601569   |
| INNATE IMMUNE RESPONSE IN MUCOSA                                                         | 16  | 0.003876975  | 0.984895477 |
| REGULATION OF CHEMOKINE SECRETION                                                        | 7   | 0.372431288  | 0.207852127 |
| RESPONSE TO STEROL                                                                       | 21  | 0.184702171  | 0.309503858 |
| REGULATION OF ENDOPLASMIC RETICULUM STRESS INDUCED INTRINSIC APOPTOTIC SIGNALING PATHWAY | 30  | -0.127501824 | 0.376660101 |
| RIBOSOMAL SMALL SUBUNIT BIOGENESIS                                                       | 56  | -0.152649212 | 0.145374646 |
| TRABECULA MORPHOGENESIS                                                                  | 37  | 0.073533177  | 0.590219258 |
| PHOTORECEPTOR CELL MAINTENANCE                                                           | 21  | -0.020734428 | 0.907151648 |
| REGULATION OF CALCIUM ION IMPORT                                                         | 83  | -0.186639318 | 0.028557633 |
| HEPARAN SULFATE PROTEOGLYCAN METABOLIC PROCESS                                           | 24  | 0.115619198  | 0.496989019 |
| INTESTINAL EPITHELIAL CELL DEVELOPMENT                                                   | 11  | -0.102129783 | 0.670994532 |
| CELLULAR RESPONSE TO GLUCAGON STIMULUS                                                   | 33  | 0.16637609   | 0.251733623 |
| REGULATION OF METAL ION TRANSPORT                                                        | 267 | -0.056858553 | 0.254051241 |
| POSITIVE REGULATION OF T HELPER 1 TYPE IMMUNE RESPONSE                                   | 12  | 0.078182998  | 0.74395667  |
| MODIFICATION BY SYMBIONT OF HOST MORPHOLOGY OR PHYSIOLOGY                                | 43  | 0.098463658  | 0.438297032 |
| SISTER CHROMATID SEGREGATION                                                             | 164 | -0.184028579 | 0.002560797 |
| REGULATION OF CELL MIGRATION INVOLVED IN SPROUTING ANGIOGENESIS                          | 19  | 0.058971965  | 0.755979898 |
| PHASIC SMOOTH MUSCLE CONTRACTION                                                         | 11  | 0.376051866  | 0.111881537 |
| AXON ENSHEATHMENT IN CENTRAL NERVOUS SYSTEM                                              | 9   | 0.14922666   | 0.59023845  |
| MONOSACCHARIDE BIOSYNTHETIC PROCESS                                                      | 48  | -0.052846454 | 0.650765336 |
| ORGANELLE MEMBRANE FUSION                                                                | 80  | -0.016930208 | 0.852980037 |
| REGULATION OF ERK1 AND ERK2 CASCADE                                                      | 197 | 0.040696845  | 0.491233683 |
| REGULATION OF T CELL MEDIATED CYTOTOXICITY                                               | 19  | -0.077256448 | 0.674928702 |
| CARBOHYDRATE DERIVATIVE BIOSYNTHETIC PROCESS                                             | 509 | -0.094188135 | 0.00908291  |
| NEGATIVE REGULATION OF ACTIN FILAMENT BUNDLE ASSEMBLY                                    | 17  | -0.242208975 | 0.182131225 |
| POSITIVE REGULATION OF CELL JUNCTION ASSEMBLY                                            | 23  | -0.18433986  | 0.251600153 |
| NONRIBOSOMAL PEPTIDE BIOSYNTHETIC PROCESS                                                | 12  | 0.299557491  | 0.197516918 |
| HEART MORPHOGENESIS                                                                      | 190 | 0.024801916  | 0.679440828 |
| RAS PROTEIN SIGNAL TRANSDUCTION                                                          | 133 | 0.018777282  | 0.792911956 |
| NEGATIVE REGULATION OF DENDRITE DEVELOPMENT                                              | 24  | -0.233218364 | 0.131631765 |
| REGULATION OF HORMONE SECRETION                                                          | 217 | -0.012881404 | 0.817362729 |
| REGULATION OF CALCIUM ION TRANSPORT                                                      | 168 | -0.155554825 | 0.010524752 |
| SENSORY PERCEPTION OF LIGHT STIMULUS                                                     | 141 | 0.079288698  | 0.2582213   |
| TERPENOID METABOLIC PROCESS                                                              | 75  | 0.080451615  | 0.40160316  |
| CELL PROLIFERATION                                                                       | 589 | 0.01247614   | 0.717380175 |
| REGULATION OF LIPID KINASE ACTIVITY                                                      | 46  | -0.251382066 | 0.024036351 |
| POSITIVE REGULATION OF OSTEOCLAST DIFFERENTIATION                                        | 21  | 0.14356008   | 0.429813644 |
| LYSOSOME LOCALIZATION                                                                    | 20  | -0.221563277 | 0.196979278 |
| VITAMIN D METABOLIC PROCESS                                                              | 11  | 0.188057792  | 0.454834105 |
| REGULATION OF FIBROBLAST PROLIFERATION                                                   | 75  | 0.055283827  | 0.563586658 |
| CELL AGGREGATION                                                                         | 15  | 0.209645296  | 0.32727587  |
| RESPONSE TO HORMONE                                                                      | 768 | 0.050231586  | 0.100476989 |
| REGULATION OF SYNCYTIIUM FORMATION BY PLASMA MEMBRANE FUSION                             | 23  | -0.032506951 | 0.847825829 |
| REGULATION OF HEXOKINASE ACTIVITY                                                        | 9   | -0.614349941 | 0.007759014 |
| POSITIVE REGULATION OF EXTRINSIC APOPTOTIC SIGNALING PATHWAY IN ABSENCE OF LIGAND        | 13  | -0.110354131 | 0.616475814 |
| CATECHOLAMINE BIOSYNTHETIC PROCESS                                                       | 14  | 0.0748034    | 0.735402677 |
| POSITIVE REGULATION OF MUSCLE HYPERTROPHY                                                | 21  | 0.09039537   | 0.618865892 |
| EMBRYONIC PATTERN SPECIFICATION                                                          | 51  | -0.078733663 | 0.483812425 |
| RESPONSE TO PROTOZOAN                                                                    | 17  | 0.110075418  | 0.586860842 |
| MULTIVESICULAR BODY ORGANIZATION                                                         | 30  | 0.26285237   | 0.090622075 |
| REGULATION OF CELL GROWTH                                                                | 356 | 0.061007323  | 0.169222786 |
| CENTROSOME CYCLE                                                                         | 41  | -0.174428456 | 0.150483905 |
| RESPONSE TO FIBROBLAST GROWTH FACTOR                                                     | 105 | -0.004409433 | 0.956063374 |
| PROTEIN CARBOXYLATION                                                                    | 10  | 0.119452257  | 0.649003608 |

|                                                                                         |      |              |             |
|-----------------------------------------------------------------------------------------|------|--------------|-------------|
| NEGATIVE REGULATION OF TELOMERE MAINTENANCE VIA TELOMERE<br>LENGTHENING                 | 17   | -0.307005475 | 0.096848008 |
| DEOXYRIBONUCLEOSIDE TRIPHOSPHATE METABOLIC PROCESS                                      | 17   | 0.142767115  | 0.47936597  |
| NUCLEOTIDE EXCISION REPAIR PREINCISION COMPLEX ASSEMBLY                                 | 28   | 0.502620318  | 0.000582412 |
| POSITIVE REGULATION OF EXTRACELLULAR MATRIX ORGANIZATION                                | 16   | 0.313258159  | 0.135319742 |
| LEARNING                                                                                | 113  | -0.046895622 | 0.539294551 |
| CILIUM ORGANIZATION                                                                     | 159  | 0.004968918  | 0.93933196  |
| REGULATION OF PHOSPHOLIPASE ACTIVITY                                                    | 52   | -0.038351504 | 0.733502326 |
| REGULATION OF RESPONSE TO FOOD                                                          | 15   | 0.153313222  | 0.474483072 |
| CHONDROCYTE DIFFERENTIATION                                                             | 48   | -0.001166412 | 0.992128552 |
| REGULATION OF CELLULAR LOCALIZATION                                                     | 1091 | -0.063099733 | 0.01299897  |
| ADRENERGIC RECEPTOR SIGNALING PATHWAY                                                   | 15   | 0.004057113  | 0.984695696 |
| OVULATION                                                                               | 14   | 0.004107839  | 0.985029419 |
| NEGATIVE REGULATION OF TOR SIGNALING                                                    | 30   | 0.154620481  | 0.311562996 |
| SUBSTANTIA NIGRA DEVELOPMENT                                                            | 41   | -0.239619591 | 0.044230446 |
| MATURATION OF SSU RRNA FROM TRICISTRONIC RRNA TRANSCRIPT SSU RRNA<br>5 8S RRNA LSU RRNA | 33   | -0.165270144 | 0.222943597 |
| PRODUCTION OF MOLECULAR MEDIATOR INVOLVED IN INFLAMMATORY<br>RESPONSE                   | 11   | -0.302173366 | 0.180442232 |
| PREPULSE INHIBITION                                                                     | 8    | 0.1368716    | 0.640635217 |
| REGULATION OF EARLY ENDOSOME TO LATE ENDOSOME TRANSPORT                                 | 16   | -0.186999133 | 0.336720189 |
| MIDDLE EAR MORPHOGENESIS                                                                | 19   | 0.12017209   | 0.528867119 |
| REGULATION OF RECEPTOR BIOSYNTHETIC PROCESS                                             | 19   | 0.086871208  | 0.648818586 |
| JNK CASCADE                                                                             | 70   | -0.002556158 | 0.979179567 |
| RESPONSE TO SALT STRESS                                                                 | 16   | 0.39610048   | 0.041766843 |
| ENDODERMAL CELL DIFFERENTIATION                                                         | 37   | -0.212159119 | 0.095524571 |
| PROTEIN KINASE B SIGNALING                                                              | 33   | -0.058958193 | 0.674596019 |
| SOMITOGENESIS                                                                           | 54   | 0.030237015  | 0.787527747 |
| REGULATION OF MULTICELLULAR ORGANISMAL DEVELOPMENT                                      | 1456 | 0.018791837  | 0.406257888 |
| REGULATION OF DENDRITIC SPINE DEVELOPMENT                                               | 51   | -0.263069549 | 0.013433097 |
| NEGATIVE REGULATION OF PROTEIN ACTIVATION CASCADE                                       | 9    | 0.105754043  | 0.703159729 |
| TRICARBOXYLIC ACID METABOLIC PROCESS                                                    | 31   | -0.326208524 | 0.01403985  |
| REGULATION OF TRIGLYCERIDE CATABOLIC PROCESS                                            | 8    | 0.329215763  | 0.245934317 |
| NEGATIVE REGULATION OF RESPONSE TO EXTRACELLULAR STIMULUS                               | 35   | -0.056111418 | 0.681052211 |
| HEMATOPOIETIC STEM CELL PROLIFERATION                                                   | 12   | -0.073560541 | 0.750994508 |
| NEGATIVE REGULATION OF ESTABLISHMENT OF PROTEIN LOCALIZATION                            | 177  | -0.085249817 | 0.15920845  |
| RENAL TUBULE DEVELOPMENT                                                                | 66   | 0.002807626  | 0.977817331 |
| CARDIAC VENTRICLE MORPHOGENESIS                                                         | 55   | 0.211162375  | 0.060628054 |
| ANTIGEN PROCESSING AND PRESENTATION OF PEPTIDE ANTIGEN VIA MHC<br>CLASS I               | 83   | -0.240538141 | 0.003853461 |
| REGULATION OF THE FORCE OF HEART CONTRACTION                                            | 25   | 0.02479802   | 0.880213575 |
| POSITIVE REGULATION OF EPITHELIAL CELL APOPTOTIC PROCESS                                | 20   | -0.398510785 | 0.011097538 |
| MACROMOLECULAR COMPLEX ASSEMBLY                                                         | 1249 | -0.059731781 | 0.012457716 |
| PROTEIN STABILIZATION                                                                   | 124  | -0.095267671 | 0.186070576 |
| POSITIVE REGULATION OF INTERLEUKIN 6 SECRETION                                          | 13   | 0.236778251  | 0.308366984 |
| ASPARTATE FAMILY AMINO ACID CATABOLIC PROCESS                                           | 16   | 0.252235408  | 0.221981832 |
| NEGATIVE REGULATION OF PROTEIN SECRETION                                                | 82   | -0.119475019 | 0.172825904 |
| NEGATIVE REGULATION OF LIPASE ACTIVITY                                                  | 15   | 0.080391243  | 0.707715427 |
| REGULATION OF CELLULAR KETONE METABOLIC PROCESS                                         | 146  | -0.05890369  | 0.379729532 |
| MATURATION OF LSU RRNA                                                                  | 13   | -0.146133391 | 0.500656081 |
| RNA SPLICING VIA ENDONUCLEOLYTIC CLEAVAGE AND LIGATION                                  | 16   | -0.280176851 | 0.128819001 |
| REGULATION OF SYNAPSE ORGANIZATION                                                      | 91   | 0.08808044   | 0.312621892 |
| MUSCLE ADAPTATION                                                                       | 22   | -0.028668276 | 0.868651155 |
| INTERFERON GAMMA PRODUCTION                                                             | 13   | -0.192043846 | 0.369160837 |
| OPTIC NERVE DEVELOPMENT                                                                 | 9    | 0.232627884  | 0.400205463 |
| PHOSPHOLIPASE C ACTIVATING G PROTEIN COUPLED RECEPTOR SIGNALING<br>PATHWAY              | 57   | 0.101123112  | 0.359366818 |
| REGULATION OF KERATINOCYTE PROLIFERATION                                                | 26   | 0.021782507  | 0.892564771 |
| GAS TRANSPORT                                                                           | 12   | 0.190286966  | 0.429212464 |
| REGULATION OF FIBROBLAST GROWTH FACTOR RECEPTOR SIGNALING<br>PATHWAY                    | 24   | 0.106277249  | 0.531514858 |
| REGULATION OF MAST CELL ACTIVATION                                                      | 33   | -0.182873894 | 0.175850567 |
| MIDBRAIN DEVELOPMENT                                                                    | 80   | -0.153301316 | 0.081042705 |
| NEURON FATE SPECIFICATION                                                               | 19   | 0.207789711  | 0.279638527 |
| ORGANIC ACID CATABOLIC PROCESS                                                          | 171  | 0.065048468  | 0.306571589 |
| REPRODUCTIVE BEHAVIOR                                                                   | 25   | -0.017378056 | 0.91514919  |

|                                                                                            |      |              |             |
|--------------------------------------------------------------------------------------------|------|--------------|-------------|
| ESTABLISHMENT OF TISSUE POLARITY                                                           | 16   | 0.355210009  | 0.074224635 |
| REGULATION OF NEURON APOPTOTIC PROCESS                                                     | 178  | -0.034001512 | 0.578527326 |
| CELL SEPARATION AFTER CYTOKINESIS                                                          | 16   | 0.143034731  | 0.49449019  |
| REGULATION OF GLUCOSE IMPORT IN RESPONSE TO INSULIN STIMULUS                               | 15   | 0.0325021    | 0.878573643 |
| AMIDE BIOSYNTHETIC PROCESS                                                                 | 466  | -0.175647132 | 1.86E-06    |
| POSITIVE REGULATION OF EXOCYTOSIS                                                          | 69   | -0.025169956 | 0.797597228 |
| MORPHOGENESIS OF AN EPITHELIAL SHEET                                                       | 38   | -0.014710075 | 0.911561914 |
| CHEMOSENSORY BEHAVIOR                                                                      | 10   | 0.05296659   | 0.839417641 |
| PROTEIN KINASE C SIGNALING                                                                 | 13   | -0.035064715 | 0.876191575 |
| GLUCOSE IMPORT                                                                             | 10   | -0.358492955 | 0.1116641   |
| SISTER CHROMATID COHESION                                                                  | 104  | -0.191859693 | 0.011726714 |
| REGULATION OF I KAPPAB KINASE NF KAPPAB SIGNALING                                          | 215  | -0.115972265 | 0.033496007 |
| REGULATION OF PROTEIN KINASE A SIGNALING                                                   | 16   | 0.166137785  | 0.426282296 |
| HEPATOCYTE APOPTOTIC PROCESS                                                               | 13   | -0.645027792 | 0.000127192 |
| TETRAHYDROFOLATE METABOLIC PROCESS                                                         | 18   | -0.067091734 | 0.723409515 |
| ORGAN MORPHOGENESIS                                                                        | 706  | 0.041574337  | 0.190769758 |
| POSITIVE REGULATION OF MULTICELLULAR ORGANISMAL PROCESS                                    | 1195 | 0.046805079  | 0.059814799 |
| REGULATION OF NECROTIC CELL DEATH                                                          | 25   | 0.059051046  | 0.721308523 |
| CELLULAR RESPONSE TO CAMP                                                                  | 45   | -0.027602305 | 0.820064556 |
| PROTEIN LOCALIZATION TO CHROMOSOME                                                         | 43   | -0.258631278 | 0.02312941  |
| POSTSYNAPTIC MEMBRANE ORGANIZATION                                                         | 22   | -0.090554614 | 0.594761775 |
| CARNITINE METABOLIC PROCESS                                                                | 12   | 0.223730916  | 0.349729889 |
| CYTOPLASMIC TRANSLATIONAL INITIATION                                                       | 14   | -0.293804847 | 0.151536095 |
| COMPLEMENT ACTIVATION ALTERNATIVE PATHWAY                                                  | 7    | 0.116716477  | 0.709835069 |
| CARDIAC MUSCLE CELL DIFFERENTIATION                                                        | 65   | 0.035910779  | 0.725854927 |
| NUCLEOSIDE TRIPHOSPHATE METABOLIC PROCESS                                                  | 206  | -0.135350343 | 0.014465203 |
| CILIMUM MOVEMENT                                                                           | 27   | 0.231692219  | 0.148289967 |
| BRANCHING INVOLVED IN URETERIC BUD MORPHOGENESIS                                           | 39   | -0.149903296 | 0.233588773 |
| VASCULAR SMOOTH MUSCLE CONTRACTION                                                         | 12   | 0.200148909  | 0.403076463 |
| REGULATION OF RESPONSE TO WOUNDING                                                         | 339  | 0.093825908  | 0.039700516 |
| POSITIVE T CELL SELECTION                                                                  | 15   | 0.142851777  | 0.512786107 |
| CELLULAR RESPONSE TO ARSENIC CONTAINING SUBSTANCE                                          | 14   | -0.462310906 | 0.013564097 |
| POSITIVE REGULATION OF RECEPTOR BIOSYNTHETIC PROCESS                                       | 9    | -0.127279375 | 0.630373023 |
| POSITIVE REGULATION OF STEM CELL DIFFERENTIATION                                           | 47   | 0.112935659  | 0.353266253 |
| REGULATION OF HEART RATE                                                                   | 71   | -0.010756629 | 0.911774164 |
| RESPONSE TO PLATELET DERIVED GROWTH FACTOR                                                 | 18   | -0.225618613 | 0.204199352 |
| REGULATION OF EXTRINSIC APOPTOTIC SIGNALING PATHWAY                                        | 145  | -0.012824525 | 0.850562901 |
| INTRASPECIES INTERACTION BETWEEN ORGANISMS                                                 | 40   | -0.075610691 | 0.551775927 |
| REGULATION OF EXTRINSIC APOPTOTIC SIGNALING PATHWAY IN ABSENCE OF LIGAND                   | 43   | 0.080911133  | 0.522761934 |
| PYRIMIDINE RIBONUCLEOTIDE METABOLIC PROCESS                                                | 22   | -0.379880591 | 0.013559187 |
| REGULATION OF B CELL DIFFERENTIATION                                                       | 20   | 0.07251167   | 0.695591343 |
| TRANSCRIPTION FROM MITOCHONDRIAL PROMOTER                                                  | 10   | 0.036172281  | 0.889633936 |
| MAINTENANCE OF PROTEIN LOCALIZATION IN ORGANELLE                                           | 26   | -0.05409094  | 0.733042279 |
| MRNA 3 END PROCESSING                                                                      | 70   | -0.221218647 | 0.016131963 |
| POSITIVE REGULATION OF TRANSCRIPTION FROM RNA POLYMERASE II PROMOTER IN RESPONSE TO STRESS | 23   | -0.068132838 | 0.684688412 |
| REGULATION OF CERAMIDE BIOSYNTHETIC PROCESS                                                | 9    | 0.362307357  | 0.18174703  |
| REGULATION OF LIPASE ACTIVITY                                                              | 67   | -0.089985622 | 0.358295368 |
| POLARIZED EPITHELIAL CELL DIFFERENTIATION                                                  | 11   | -0.108752635 | 0.65335011  |
| INNATE IMMUNE RESPONSE                                                                     | 446  | 0.067729944  | 0.088825829 |
| CARDIAC RIGHT VENTRICLE MORPHOGENESIS                                                      | 16   | 0.197747111  | 0.340645992 |
| G PROTEIN COUPLED RECEPTOR SIGNALING PATHWAY                                               | 575  | 0.106814736  | 0.002516717 |
| DIGESTIVE TRACT MORPHOGENESIS                                                              | 41   | 0.027429698  | 0.831129894 |
| SPERM EGG RECOGNITION                                                                      | 28   | -0.000391011 | 0.997983621 |
| GALACTOSE METABOLIC PROCESS                                                                | 13   | -0.320318261 | 0.123481411 |
| GLOBAL GENOME NUCLEOTIDE EXCISION REPAIR                                                   | 32   | 0.067889922  | 0.643470008 |
| REGULATION OF ACYL COA BIOSYNTHETIC PROCESS                                                | 13   | -0.406240109 | 0.031174228 |
| REGULATION OF VASCULAR ENDOTHELIAL GROWTH FACTOR RECEPTOR SIGNALING PATHWAY                | 27   | -0.158563836 | 0.292611703 |
| NEGATIVE REGULATION OF MRNA METABOLIC PROCESS                                              | 33   | -0.018592274 | 0.895810447 |
| REGULATION OF TRANSCRIPTION FROM RNA POLYMERASE I PROMOTER                                 | 23   | -0.149410889 | 0.362664495 |
| REGULATION OF DNA TEMPLATED TRANSCRIPTION INITIATION                                       | 28   | -0.0794886   | 0.600224945 |
| REGULATION OF CELL ADHESION MEDIATED BY INTEGRIN                                           | 34   | -0.164715863 | 0.218198548 |
| NUCLEOSIDE TRIPHOSPHATE BIOSYNTHETIC PROCESS                                               | 54   | -0.284514782 | 0.004813992 |
| GLYOXYLATE METABOLIC PROCESS                                                               | 24   | -0.187431725 | 0.234376522 |

|                                                                            |     |              |             |
|----------------------------------------------------------------------------|-----|--------------|-------------|
| RELAXATION OF MUSCLE                                                       | 18  | -0.042314953 | 0.824647144 |
| REGULATION OF PROTEIN MODIFICATION BY SMALL PROTEIN CONJUGATION OR REMOVAL | 258 | -0.028482825 | 0.576864687 |
| CELLULAR ANION HOMEOSTASIS                                                 | 13  | -0.294316701 | 0.154696599 |
| TOXIN METABOLIC PROCESS                                                    | 11  | 0.043101734  | 0.86239152  |
| COVALENT CHROMATIN MODIFICATION                                            | 315 | -0.087383215 | 0.05572328  |
| REGULATION OF N METHYL D ASPARTATE SELECTIVE GLUTAMATE RECEPTOR ACTIVITY   | 11  | 0.232752814  | 0.349973097 |
| PURINE CONTAINING COMPOUND BIOSYNTHETIC PROCESS                            | 116 | -0.075070044 | 0.315682461 |
| NEGATIVE REGULATION OF CELL CYCLE ARREST                                   | 19  | 0.091023341  | 0.633165983 |
| DNA DEMETHYLATION                                                          | 14  | 0.113894528  | 0.608878621 |
| POST EMBRYONIC MORPHOGENESIS                                               | 11  | 0.38737294   | 0.101875862 |
| SKELETAL MUSCLE ORGAN DEVELOPMENT                                          | 116 | -0.041575365 | 0.58192098  |
| POSITIVE REGULATION OF RECEPTOR ACTIVITY                                   | 41  | -0.132669261 | 0.2847234   |
| FC RECEPTOR SIGNALING PATHWAY                                              | 166 | -0.041798588 | 0.508678582 |
| NEGATIVE REGULATION OF HOMEOSTATIC PROCESS                                 | 113 | -0.091958516 | 0.222949713 |
| APPENDAGE DEVELOPMENT                                                      | 150 | -0.069112087 | 0.295234635 |
| REGULATION OF B CELL MEDIATED IMMUNITY                                     | 36  | 0.044269654  | 0.74777352  |
| REGULATION OF MITOCHONDRIAL FISSION                                        | 17  | -0.191967738 | 0.304337544 |
| NEUTRAL LIPID CATABOLIC PROCESS                                            | 19  | 0.359668579  | 0.047600686 |
| POSITIVE REGULATION OF CATECHOLAMINE SECRETION                             | 12  | -0.05792399  | 0.803622693 |
| NEGATIVE REGULATION OF PEPTIDYL THREONINE PHOSPHORYLATION                  | 15  | -0.307839966 | 0.097765589 |
| REGULATION OF CHEMOKINE PRODUCTION                                         | 53  | -0.115065061 | 0.292001255 |
| PROTEIN AUTOUBIQUITINATION                                                 | 48  | 0.065661903  | 0.58339047  |
| PORE COMPLEX ASSEMBLY                                                      | 15  | -0.322430558 | 0.087937621 |
| PROTEIN LIPID COMPLEX SUBUNIT ORGANIZATION                                 | 28  | 0.281541458  | 0.069831051 |
| NEGATIVE REGULATION OF T CELL APOPTOTIC PROCESS                            | 15  | 0.172127019  | 0.423158254 |
| NEGATIVE REGULATION OF PHOSPHORUS METABOLIC PROCESS                        | 484 | -0.016032337 | 0.670384355 |
| 4 HYDROXYPROLINE METABOLIC PROCESS                                         | 11  | 0.050735649  | 0.838735837 |
| REGULATION OF CELL CYCLE G1 S PHASE TRANSITION                             | 139 | -0.102103781 | 0.133436942 |
| ANION HOMEOSTASIS                                                          | 35  | 0.05963075   | 0.670181958 |
| LIPOPROTEIN BIOSYNTHETIC PROCESS                                           | 72  | -0.102944814 | 0.2734036   |
| RESPONSE TO FOLLICLE STIMULATING HORMONE                                   | 9   | 0.645621461  | 0.00514807  |
| CELLULAR POTASSIUM ION HOMEOSTASIS                                         | 11  | -0.076240517 | 0.752877308 |
| PROTEIN MANNOSYLATION                                                      | 20  | 0.104328851  | 0.575587228 |
| REGULATION OF FATTY ACID TRANSPORT                                         | 22  | 0.100323579  | 0.571446752 |
| HORMONE BIOSYNTHETIC PROCESS                                               | 36  | 0.130026462  | 0.348755588 |
| ELECTRON TRANSPORT CHAIN                                                   | 84  | -0.164499501 | 0.053384089 |
| REGULATION OF CIRCADIAN SLEEP WAKE CYCLE NON REM SLEEP                     | 9   | 0.209577842  | 0.449785178 |
| REGULATION OF PATHWAY RESTRICTED SMAD PROTEIN PHOSPHORYLATION              | 47  | 0.136042329  | 0.26434522  |
| EXTRACELLULAR REGULATION OF SIGNAL TRANSDUCTION                            | 11  | 0.086217785  | 0.730224648 |
| NUCLEOTIDE EXCISION REPAIR DNA GAP FILLING                                 | 24  | 0.325158135  | 0.06027528  |
| GLYCOSPHINGOLIPID BIOSYNTHETIC PROCESS                                     | 22  | -0.02189507  | 0.89966222  |
| RESPONSE TO ORGANIC CYCLIC COMPOUND                                        | 780 | 0.025332727  | 0.40190698  |
| CELL COMMUNICATION BY ELECTRICAL COUPLING                                  | 14  | -0.141948918 | 0.498378251 |
| ONE CARBON METABOLIC PROCESS                                               | 30  | 0.047035262  | 0.755140904 |
| TRANSEPITHELIAL TRANSPORT                                                  | 10  | 0.377312671  | 0.141948111 |
| VACUOLAR ACIDIFICATION                                                     | 14  | 0.051685308  | 0.814855609 |
| CELL DIFFERENTIATION IN HINDBRAIN                                          | 17  | -0.086375029 | 0.656517628 |
| REGULATION OF INTERLEUKIN 1 PRODUCTION                                     | 43  | -0.069270276 | 0.57263748  |
| POSITIVE REGULATION OF ANTIGEN PROCESSING AND PRESENTATION                 | 10  | 0.073184198  | 0.779843983 |
| NEGATIVE REGULATION OF CELL MORPHOGENESIS INVOLVED IN DIFFERENTIATION      | 105 | 0.038596507  | 0.63251876  |
| REGULATION OF PEROXISOME PROLIFERATOR ACTIVATED RECEPTOR SIGNALING PATHWAY | 9   | 0.201456629  | 0.472286164 |
| POSITIVE REGULATION OF CD4 POSITIVE ALPHA BETA T CELL ACTIVATION           | 24  | 0.070570486  | 0.676537795 |
| GLYCOPROTEIN CATABOLIC PROCESS                                             | 12  | -0.061941285 | 0.790000874 |
| REGULATION OF LYMPHOCYTE CHEMOTAXIS                                        | 17  | -0.452920714 | 0.008218885 |
| RENAL WATER HOMEOSTASIS                                                    | 28  | -0.034952618 | 0.819815288 |
| REGULATION OF DNA METHYLATION                                              | 15  | 0.166169177  | 0.441736203 |
| HEART VALVE FORMATION                                                      | 10  | 0.220564159  | 0.40221832  |
| MITOTIC NUCLEAR DIVISION                                                   | 339 | -0.0918236   | 0.036867874 |
| NEGATIVE REGULATION OF MYELOID LEUKOCYTE DIFFERENTIATION                   | 38  | -0.14179282  | 0.267650589 |
| FAT SOLUBLE VITAMIN METABOLIC PROCESS                                      | 26  | 0.233453235  | 0.150009347 |
| ACTOMYOSIN STRUCTURE ORGANIZATION                                          | 63  | -0.127839762 | 0.200479564 |
| NUCLEOTIDE TRANSMEMBRANE TRANSPORT                                         | 12  | -0.226789921 | 0.306303412 |

|                                                                    |      |              |             |
|--------------------------------------------------------------------|------|--------------|-------------|
| POSITIVE REGULATION OF CELL CYCLE PROCESS                          | 219  | -0.059711941 | 0.27689118  |
| REGULATION OF CHONDROCYTE DIFFERENTIATION                          | 38   | -0.158044435 | 0.211341734 |
| REGULATION OF PSEUDOPodium ASSEMBLY                                | 12   | 0.24904975   | 0.292150077 |
| PALLIUM DEVELOPMENT                                                | 136  | 0.035355566  | 0.618379958 |
| REGULATION OF RESPONSE TO STRESS                                   | 1295 | -0.025032897 | 0.290174    |
| CARDIAC CELL FATE COMMITMENT                                       | 9    | 0.263944828  | 0.337822256 |
| POSITIVE REGULATION OF INTERLEUKIN 1 PRODUCTION                    | 28   | 0.070252564  | 0.653712965 |
| MYOFIBRIL ASSEMBLY                                                 | 37   | -0.15127567  | 0.242923932 |
| NEGATIVE REGULATION OF CHEMOTAXIS                                  | 44   | 0.190043822  | 0.131576846 |
| BLOOD COAGULATION INTRINSIC PATHWAY                                | 15   | 0.243364843  | 0.249885794 |
| GLOMERULUS DEVELOPMENT                                             | 41   | -0.123141786 | 0.31968311  |
| TELOMERE MAINTENANCE VIA RECOMBINATION                             | 32   | -0.065485406 | 0.64569866  |
| REGULATION OF RELEASE OF CYTOCHROME C FROM MITOCHONDRIA            | 42   | -0.152491058 | 0.208091039 |
| CELL CELL SIGNALING INVOLVED IN CARDIAC CONDUCTION                 | 20   | -0.002731196 | 0.98808776  |
| CELLULAR RESPONSE TO THYROID HORMONE STIMULUS                      | 13   | -0.339484371 | 0.082113795 |
| PHOSPHATE CONTAINING COMPOUND METABOLIC PROCESS                    | 1732 | -0.02597612  | 0.211745649 |
| POSITIVE REGULATION OF NF KAPPAB TRANSCRIPTION FACTOR ACTIVITY     | 116  | 0.047155262  | 0.539947536 |
| MITOCHONDRIAL RNA PROCESSING                                       | 13   | 0.004457277  | 0.984347534 |
| CELLULAR LIPID CATABOLIC PROCESS                                   | 126  | 0.120983117  | 0.104322955 |
| REGULATION OF CARDIAC MUSCLE CELL ACTION POTENTIAL                 | 17   | -0.239724888 | 0.191724205 |
| POSITIVE REGULATION OF HAIR CYCLE                                  | 10   | 0.353143262  | 0.160266369 |
| SYMPATHETIC NERVOUS SYSTEM DEVELOPMENT                             | 19   | 0.011743945  | 0.950256164 |
| REGULATION OF ALPHA BETA T CELL DIFFERENTIATION                    | 40   | 0.109246747  | 0.407801643 |
| MULTICELLULAR ORGANISM GROWTH                                      | 70   | 0.030926974  | 0.753815139 |
| GRANULOCYTE MIGRATION                                              | 59   | 0.113777123  | 0.293368286 |
| POSITIVE REGULATION OF ANTIGEN RECEPTOR MEDIATED SIGNALING PATHWAY | 14   | -0.087841235 | 0.681781521 |
| NCRNA METABOLIC PROCESS                                            | 507  | -0.129409664 | 0.000307009 |
| PHOSPHATE ION TRANSPORT                                            | 12   | -0.068460765 | 0.768095743 |
| NEGATIVE REGULATION OF BMP SIGNALING PATHWAY                       | 36   | 0.07450656   | 0.590283341 |
| POSITIVE REGULATION OF NEURAL PRECURSOR CELL PROLIFERATION         | 32   | -0.054719168 | 0.701683448 |
| REGULATION OF CELLULAR EXTRAVASATION                               | 20   | 0.146847508  | 0.429997254 |
| CARDIAC MUSCLE TISSUE MORPHOGENESIS                                | 47   | 0.215632524  | 0.076100049 |
| GRANULOCYTE ACTIVATION                                             | 18   | -0.082692388 | 0.661115278 |
| REGULATION OF MACROPHAGE CYTOKINE PRODUCTION                       | 11   | 0.279326948  | 0.261597192 |
| PURINE NUCLEOBASE BIOSYNTHETIC PROCESS                             | 11   | 0.021191096  | 0.931848139 |
| MITOTIC G2 DNA DAMAGE CHECKPOINT                                   | 13   | 0.032173017  | 0.888003227 |
| POSITIVE REGULATION OF PROTEIN AUTOPHOSPHORYLATION                 | 21   | 0.151132711  | 0.406070105 |
| NEGATIVE REGULATION OF NUCLEOCYTOPLASMIC TRANSPORT                 | 65   | 0.039566464  | 0.699429408 |
| POSITIVE REGULATION OF CELL ACTIVATION                             | 248  | -0.076698197 | 0.135778603 |
| CARBOHYDRATE BIOSYNTHETIC PROCESS                                  | 110  | -0.062937646 | 0.414277136 |
| AMINO SUGAR METABOLIC PROCESS                                      | 35   | 0.045529386  | 0.744359827 |
| POSITIVE REGULATION OF NUCLEOTIDE CATABOLIC PROCESS                | 15   | -0.010284065 | 0.961096942 |
| REGULATION OF CYTOKINESIS                                          | 53   | -0.080768605 | 0.46413856  |
| VITAMIN BIOSYNTHETIC PROCESS                                       | 15   | -0.248937328 | 0.200255822 |
| POSITIVE REGULATION OF NON CANONICAL WNT SIGNALING PATHWAY         | 10   | 0.647963659  | 0.004326601 |
| MUSCLE ORGAN MORPHOGENESIS                                         | 61   | 0.195599828  | 0.067580449 |
| AMINO ACID TRANSPORT                                               | 103  | -0.065923562 | 0.407408583 |
| CELLULAR RESPONSE TO EPINEPHRINE STIMULUS                          | 10   | 0.294914635  | 0.249228563 |
| POSITIVE REGULATION OF CELL ADHESION MEDIATED BY INTEGRIN          | 14   | 0.007697654  | 0.971971932 |
| REGULATION OF MICROTUBULE BASED MOVEMENT                           | 12   | -0.223531823 | 0.304306583 |
| EXOCRINE SYSTEM DEVELOPMENT                                        | 39   | 0.05404306   | 0.683450645 |
| AMINOGLYCAN METABOLIC PROCESS                                      | 143  | -0.075329704 | 0.264207671 |
| NEGATIVE REGULATION OF MYOBLAST DIFFERENTIATION                    | 19   | -0.157407003 | 0.38185171  |
| REGULATION OF FEVER GENERATION                                     | 11   | -0.046146626 | 0.849905329 |
| DNA TEMPLATED TRANSCRIPTIONAL PREINITIATION COMPLEX ASSEMBLY       | 10   | -0.080991702 | 0.74888712  |
| MACROPHAGE ACTIVATION                                              | 27   | 0.091820934  | 0.565348708 |
| CARDIOBLAST DIFFERENTIATION                                        | 12   | 0.216588231  | 0.380555046 |
| CELL CYCLE G1 S PHASE TRANSITION                                   | 108  | -0.18878695  | 0.011975757 |
| RNA SPLICING VIA TRANSESTERIFICATION REACTIONS                     | 255  | -0.140201335 | 0.004882334 |
| BLOOD VESSEL MORPHOGENESIS                                         | 332  | 0.024536218  | 0.590685368 |
| REGULATION OF URINE VOLUME                                         | 17   | 0.010599706  | 0.957511274 |
| PHOTORECEPTOR CELL DEVELOPMENT                                     | 31   | 0.009934847  | 0.946255706 |
| SYNAPTIC TRANSMISSION DOPAMINERGIC                                 | 10   | 0.081658483  | 0.755154746 |
| PROTEIN PHOSPHORYLATION                                            | 822  | 0.019964554  | 0.497877347 |
| CENTRAL NERVOUS SYSTEM NEURON DIFFERENTIATION                      | 133  | 0.070373146  | 0.329498174 |

|                                                                 |      |              |             |
|-----------------------------------------------------------------|------|--------------|-------------|
| REGULATION OF CELL DIFFERENTIATION                              | 1292 | 0.038963807  | 0.103976844 |
| MAINTENANCE OF GASTROINTESTINAL EPITHELIUM                      | 13   | 0.09242898   | 0.687980663 |
| ENDOTHELIUM DEVELOPMENT                                         | 80   | -0.113129755 | 0.204633504 |
| DOUBLE STRAND BREAK REPAIR                                      | 154  | 0.01961905   | 0.768059524 |
| NUCLEOBASE CONTAINING COMPOUND TRANSPORT                        | 185  | -0.242023313 | 2.19E-05    |
| REGULATION OF NEURON MIGRATION                                  | 25   | 0.256962883  | 0.12357575  |
| METHIONINE BIOSYNTHETIC PROCESS                                 | 14   | 0.041936229  | 0.849191764 |
| MULTI ORGANISM ORGANELLE ORGANIZATION                           | 23   | 0.381623481  | 0.031400529 |
| MESONEPHRIC TUBULE MORPHOGENESIS                                | 47   | -0.094493754 | 0.417759147 |
| RELEASE OF CYTOCHROME C FROM MITOCHONDRIA                       | 20   | -0.010321966 | 0.954925178 |
| REGULATION OF CYTOKINE SECRETION INVOLVED IN IMMUNE RESPONSE    | 10   | 0.214335188  | 0.410065929 |
| RESPONSE TO INTERLEUKIN 1                                       | 97   | -0.003342822 | 0.967976519 |
| EMBRYONIC HINDLIMB MORPHOGENESIS                                | 24   | 0.142733675  | 0.401397099 |
| WATER SOLUBLE VITAMIN METABOLIC PROCESS                         | 81   | -0.105070226 | 0.235371301 |
| SIGNAL TRANSDUCTION IN ABSENCE OF LIGAND                        | 29   | 0.235196215  | 0.133059074 |
| RNA CAPPING                                                     | 37   | -0.142736935 | 0.269234446 |
| MALE MEIOSIS                                                    | 28   | 0.134252421  | 0.393688509 |
| LIVER REGENERATION                                              | 16   | -0.161597266 | 0.411278396 |
| REGULATION OF REACTIVE OXYGEN SPECIES METABOLIC PROCESS         | 139  | 0.029442497  | 0.674536529 |
| REGULATION OF RENAL SODIUM EXCRETION                            | 17   | 0.309819114  | 0.113594752 |
| NEGATIVE REGULATION OF DEFENSE RESPONSE                         | 121  | -0.03842072  | 0.603623186 |
| SPINAL CORD PATTERNING                                          | 16   | 0.216989655  | 0.30193646  |
| DNA REPLICATION INITIATION                                      | 28   | -0.031101216 | 0.839540246 |
| ERYTHROCYTE MATURATION                                          | 8    | -0.110918259 | 0.694221819 |
| ETHANOLAMINE CONTAINING COMPOUND METABOLIC PROCESS              | 64   | 0.115396197  | 0.268281689 |
| POSITIVE REGULATION OF DENDRITE DEVELOPMENT                     | 59   | -0.140636169 | 0.171784975 |
| MEMBRANE DEPOLARIZATION DURING CARDIAC MUSCLE CELL ACTION       |      |              |             |
| POTENTIAL                                                       | 13   | -0.354744953 | 0.072425864 |
| BASIC AMINO ACID TRANSPORT                                      | 10   | -0.137522138 | 0.579455697 |
| REGULATION OF CAMP MEDIATED SIGNALING                           | 19   | 0.261802521  | 0.166090181 |
| CELL MIGRATION INVOLVED IN GASTRULATION                         | 13   | 0.091987519  | 0.689392076 |
| ASTROCYTE DIFFERENTIATION                                       | 33   | 0.272835301  | 0.060640423 |
| PROTEIN MONOUBIQUITINATION                                      | 50   | -0.03037958  | 0.791810187 |
| POSITIVE REGULATION OF ALPHA BETA T CELL PROLIFERATION          | 17   | -0.073583728 | 0.705777987 |
| FACE DEVELOPMENT                                                | 45   | 0.047779529  | 0.698428827 |
| RNA DESTABILIZATION                                             | 15   | -0.179698114 | 0.367299227 |
| RESPONSE TO ESTROGEN                                            | 190  | 0.001575714  | 0.978958294 |
| DETOXIFICATION                                                  | 65   | -0.099517497 | 0.31451052  |
| REGULATION OF OSTEOBLAST PROLIFERATION                          | 21   | 0.24886215   | 0.167543888 |
| CILIUM OR FLAGELLUM DEPENDENT CELL MOTILITY                     | 10   | 0.013580977  | 0.958261723 |
| VERY LONG CHAIN FATTY ACID METABOLIC PROCESS                    | 25   | 0.235711773  | 0.154533164 |
| ESTABLISHMENT OF PROTEIN LOCALIZATION TO MEMBRANE               | 251  | -0.032869059 | 0.524867104 |
| SMALL GTPASE MEDIATED SIGNAL TRANSDUCTION                       | 317  | 0.024587948  | 0.598262256 |
| REGULATION OF PEPTIDASE ACTIVITY                                | 323  | -0.0146879   | 0.748792966 |
| POSITIVE REGULATION OF PROTEIN SERINE THREONINE KINASE ACTIVITY | 259  | -0.062446184 | 0.216582022 |
| BROWN FAT CELL DIFFERENTIATION                                  | 27   | 0.257474216  | 0.105554648 |
| LIPID TRANSLOCATION                                             | 17   | 0.680001966  | 0.000143585 |
| INOSITOL METABOLIC PROCESS                                      | 10   | -0.0214266   | 0.933682357 |
| REGULATION OF CENTROSOME CYCLE                                  | 36   | 0.002330035  | 0.986387841 |
| POSITIVE REGULATION OF TRANSFERASE ACTIVITY                     | 555  | -0.051822325 | 0.13858885  |
| REGULATION OF IMMUNE SYSTEM PROCESS                             | 1155 | -0.054049304 | 0.029255453 |
| PROTEIN ADP RIBOSYLATION                                        | 18   | -0.154387011 | 0.403672911 |
| CELLULAR SODIUM ION HOMEOSTASIS                                 | 17   | 0.386446659  | 0.052165027 |
| NEGATIVE REGULATION OF CARTILAGE DEVELOPMENT                    | 21   | -0.095336048 | 0.584120632 |
| CHONDROITIN SULFATE BIOSYNTHETIC PROCESS                        | 24   | -0.068456339 | 0.677051504 |
| PROTEIN SUMOYLATION                                             | 114  | -0.224852407 | 0.001805643 |
| MEGAKARYOCYTE DEVELOPMENT                                       | 14   | -0.371423424 | 0.050745369 |
| REGULATION OF HISTONE H3 K9 METHYLATION                         | 16   | 0.146059317  | 0.485770612 |
| VASODILATION                                                    | 22   | 0.187431604  | 0.28986039  |
| NEGATIVE REGULATION OF MITOTIC CELL CYCLE                       | 190  | -0.131823041 | 0.022523554 |
| NEGATIVE REGULATION OF MOLECULAR FUNCTION                       | 921  | -0.030656939 | 0.267539255 |
| NEURONAL ION CHANNEL CLUSTERING                                 | 9    | -0.068026293 | 0.799563509 |
| POSITIVE REGULATION OF AXON EXTENSION                           | 36   | -0.065308511 | 0.626853378 |
| REGULATION OF ION HOMEOSTASIS                                   | 163  | -0.093080316 | 0.138994119 |
| PIGMENT CELL DIFFERENTIATION                                    | 26   | 0.277865539  | 0.08304757  |
| ORGAN GROWTH                                                    | 60   | -0.023894258 | 0.820390954 |

|                                                                           |      |              |             |
|---------------------------------------------------------------------------|------|--------------|-------------|
| REGULATION OF LYMPHOCYTE DIFFERENTIATION                                  | 118  | 0.030352174  | 0.68984491  |
| REGULATION OF BONE REMODELING                                             | 36   | -0.088047193 | 0.509677609 |
| GLUCOCORTICOID BIOSYNTHETIC PROCESS                                       | 4    | 0.185229973  | 0.65349627  |
| REGULATION OF T CELL PROLIFERATION                                        | 125  | -0.082705435 | 0.25060035  |
| NERVE DEVELOPMENT                                                         | 59   | -0.027753113 | 0.793540664 |
| REGULATION OF NEUROBLAST PROLIFERATION                                    | 22   | -0.089714839 | 0.598436165 |
| DETECTION OF MOLECULE OF BACTERIAL ORIGIN                                 | 7    | 0.160976133  | 0.60825399  |
| PHAGOSOME ACIDIFICATION                                                   | 24   | 0.287179982  | 0.091004866 |
| REGULATION OF CELL SIZE                                                   | 158  | -0.059641766 | 0.355292157 |
| TETRAPYRROLE METABOLIC PROCESS                                            | 49   | -0.164857074 | 0.1391722   |
| REGULATION OF CENTROSOME DUPLICATION                                      | 29   | 0.13402699   | 0.388091656 |
| VENTRAL SPINAL CORD INTERNEURON DIFFERENTIATION                           | 10   | 0.461098907  | 0.076040141 |
| NEGATIVE REGULATION OF TRANSFERASE ACTIVITY                               | 316  | -0.145227517 | 0.001206972 |
| BICELLULAR TIGHT JUNCTION ASSEMBLY                                        | 28   | -0.200221594 | 0.169300935 |
| POSITIVE REGULATION OF CARDIAC MUSCLE TISSUE DEVELOPMENT                  | 27   | 0.166893236  | 0.298538757 |
| RIBONUCLEOPROTEIN COMPLEX SUBUNIT ORGANIZATION                            | 189  | -0.23850265  | 1.94E-05    |
| REGULATION OF CALCIUM ION TRANSPORT INTO CYTOSOL                          | 74   | -0.291119142 | 0.000772146 |
| MULTICELLULAR ORGANISMAL WATER HOMEOSTASIS                                | 45   | -0.032708654 | 0.787248552 |
| REGULATION OF ALTERNATIVE MRNA SPLICING VIA SPLICEOSOME                   | 32   | 0.173889176  | 0.242157392 |
| KERATAN SULFATE CATABOLIC PROCESS                                         | 9    | -0.027236726 | 0.919954451 |
| BLASTOCYST DEVELOPMENT                                                    | 59   | -0.066879545 | 0.52427503  |
| REGULATION OF GRANULOCYTE CHEMOTAXIS                                      | 36   | 0.179496533  | 0.19595984  |
| CHROMATIN ORGANIZATION                                                    | 592  | -0.024620558 | 0.470645144 |
| POSITIVE REGULATION OF CYTOKINESIS                                        | 26   | -0.10944993  | 0.482838455 |
| EPHRIN RECEPTOR SIGNALING PATHWAY                                         | 77   | -0.244007691 | 0.005262636 |
| ORGANIC ANION TRANSPORT                                                   | 315  | 0.036045545  | 0.442192686 |
| STAT CASCADE                                                              | 44   | -0.108845167 | 0.364503865 |
| RESPONSE TO OXYGEN CONTAINING COMPOUND                                    | 1176 | -0.016671533 | 0.50081782  |
| BICARBONATE TRANSPORT                                                     | 32   | 0.067624749  | 0.64421045  |
| POSITIVE REGULATION OF EXCITATORY POSTSYNAPTIC POTENTIAL                  | 16   | -0.214212019 | 0.258566898 |
| NEGATIVE REGULATION OF PATHWAY RESTRICTED SMAD PROTEIN<br>PHOSPHORYLATION | 10   | 0.540433872  | 0.022216565 |
| SEGMENTATION                                                              | 77   | 0.058372298  | 0.536573781 |
| POSITIVE REGULATION OF PEPTIDASE ACTIVITY                                 | 139  | -0.070641264 | 0.302749801 |
| POSITIVE REGULATION OF T CELL CYTOKINE PRODUCTION                         | 13   | 0.003755179  | 0.986810855 |
| PYRIMIDINE CONTAINING COMPOUND SALVAGE                                    | 11   | -0.199895644 | 0.385724121 |
| REGULATION OF OLIGODENDROCYTE DIFFERENTIATION                             | 26   | -0.029724091 | 0.852154288 |
| TRNA METHYLATION                                                          | 22   | -0.200461908 | 0.220615861 |
| INTERACTION WITH HOST                                                     | 129  | 0.015782403  | 0.827834074 |
| GASTRULATION                                                              | 139  | -0.119377217 | 0.077438171 |
| RESPONSE TO UV                                                            | 115  | -0.260460974 | 0.000226085 |
| REGULATION OF NEUROTRANSMITTER TRANSPORT                                  | 52   | 0.004350553  | 0.969488825 |
| NEGATIVE REGULATION OF VASCULATURE DEVELOPMENT                            | 72   | 0.070913751  | 0.468592724 |
| SKIN EPIDERMIS DEVELOPMENT                                                | 63   | 0.065569155  | 0.530327268 |
| VIRAL GENOME REPLICATION                                                  | 17   | 0.148142161  | 0.467405821 |
| NUCLEOTIDE EXCISION REPAIR                                                | 106  | 0.102170066  | 0.207846422 |
| POSITIVE REGULATION OF REACTIVE OXYGEN SPECIES METABOLIC PROCESS          | 78   | 0.079198124  | 0.40009588  |
| NEGATIVE REGULATION OF RELEASE OF CYTOCHROME C FROM<br>MITOCHONDRIA       | 16   | -0.441169653 | 0.011699156 |
| GOLGI TO ENDOSOME TRANSPORT                                               | 18   | -0.189217309 | 0.308286047 |
| REGULATION OF MUSCLE HYPERTROPHY                                          | 33   | 0.105687876  | 0.467098587 |
| CARBOHYDRATE TRANSMEMBRANE TRANSPORT                                      | 17   | -0.266928025 | 0.137239005 |
| SULFUR COMPOUND TRANSPORT                                                 | 25   | -0.351118752 | 0.015153626 |
| FATTY ACID BIOSYNTHETIC PROCESS                                           | 88   | -0.025349891 | 0.770641956 |
| HEART FORMATION                                                           | 11   | 0.093098009  | 0.709905119 |
| RECEPTOR INTERNALIZATION                                                  | 41   | 0.110886904  | 0.394409457 |
| POSITIVE REGULATION OF MAST CELL ACTIVATION                               | 13   | 0.068358611  | 0.76582415  |
| REGULATION OF ODONTOGENESIS                                               | 17   | -0.119413077 | 0.534473904 |
| MULTICELLULAR ORGANISM METABOLIC PROCESS                                  | 73   | -0.133831264 | 0.14836787  |
| PARTURITION                                                               | 17   | -0.003051905 | 0.987725771 |
| NEGATIVE REGULATION OF ANDROGEN RECEPTOR SIGNALING PATHWAY                | 11   | -0.256393886 | 0.253327578 |
| ALPHA LINOLENIC ACID METABOLIC PROCESS                                    | 11   | 0.329747764  | 0.171102296 |
| REGULATION OF ARP2 3 COMPLEX MEDIATED ACTIN NUCLEATION                    | 14   | -0.016264865 | 0.9405111   |
| HOMEOSTASIS OF NUMBER OF CELLS                                            | 155  | -0.09962091  | 0.122432675 |
| MEIOTIC CHROMOSOME SEPARATION                                             | 9    | -0.543855092 | 0.007194643 |
| REGULATION OF CALCINEURIN NFAT SIGNALING CASCADE                          | 16   | 0.074747396  | 0.718336046 |

|                                                                                                     |     |              |             |
|-----------------------------------------------------------------------------------------------------|-----|--------------|-------------|
| DIOL METABOLIC PROCESS                                                                              | 10  | -0.085833094 | 0.734209027 |
| REGULATION OF RYANODINE SENSITIVE CALCIUM RELEASE CHANNEL ACTIVITY                                  | 23  | -0.300482092 | 0.047973302 |
| OXYGEN TRANSPORT                                                                                    | 9   | 0.057859682  | 0.833760725 |
| REGULATION OF LIPID TRANSPORT                                                                       | 74  | 0.211149478  | 0.030832427 |
| POSITIVE REGULATION OF TRIGLYCERIDE BIOSYNTHETIC PROCESS                                            | 13  | 0.202375145  | 0.385909697 |
| REGULATION OF REPRODUCTIVE PROCESS                                                                  | 105 | 0.046753249  | 0.563025942 |
| REGULATION OF MEMBRANE PROTEIN ECTODOMAIN PROTEOLYSIS                                               | 19  | 0.19303306   | 0.309348461 |
| POSITIVE REGULATION OF HORMONE SECRETION                                                            | 95  | 0.007393709  | 0.930129694 |
| ORGAN INDUCTION                                                                                     | 14  | -0.303307046 | 0.12200276  |
| DNA STRAND ELONGATION                                                                               | 30  | 0.164595645  | 0.281144143 |
| NEURON PROJECTION MORPHOGENESIS                                                                     | 350 | 0.109110532  | 0.015456643 |
| REGULATION OF CELL DIVISION                                                                         | 235 | -0.03827966  | 0.47281154  |
| MULTIVESICULAR BODY SORTING PATHWAY                                                                 | 11  | 0.16669531   | 0.505900161 |
| REGULATION OF LYMPHOCYTE MEDIATED IMMUNITY                                                          | 95  | -0.017761578 | 0.832259615 |
| SOMATIC DIVERSIFICATION OF IMMUNE RECEPTORS                                                         | 37  | -0.099668006 | 0.448312728 |
| NOTCH SIGNALING PATHWAY                                                                             | 98  | -0.039171871 | 0.633546806 |
| OUTER DYNEIN ARM ASSEMBLY                                                                           | 7   | 0.528168455  | 0.07907331  |
| POSITIVE REGULATION OF CELLULAR RESPONSE TO INSULIN STIMULUS                                        | 20  | -0.079471929 | 0.657790166 |
| RESPONSE TO RADIATION                                                                               | 356 | -0.076813428 | 0.074708478 |
| BILE ACID AND BILE SALT TRANSPORT                                                                   | 19  | 0.125258897  | 0.512706282 |
| HEART DEVELOPMENT                                                                                   | 422 | -0.029066687 | 0.468973727 |
| TISSUE REGENERATION                                                                                 | 43  | 0.201367303  | 0.114505626 |
| MESODERM MORPHOGENESIS                                                                              | 59  | -0.021337005 | 0.840761134 |
| NEGATIVE REGULATION OF SMOOTHENED SIGNALING PATHWAY                                                 | 23  | 0.053001629  | 0.758628858 |
| RECEPTOR METABOLIC PROCESS                                                                          | 71  | 0.046717423  | 0.634254443 |
| NUCLEOSIDE SALVAGE                                                                                  | 16  | -0.303092229 | 0.097356339 |
| INFLAMMATORY RESPONSE                                                                               | 340 | 0.011063814  | 0.805672301 |
| TRNA TRANSPORT                                                                                      | 33  | -0.371982427 | 0.00811465  |
| REGULATION OF NIK NF KAPPAB SIGNALING                                                               | 38  | -0.07512965  | 0.564277431 |
| NEGATIVE REGULATION OF APOPTOSIS                                                                    | 16  | -0.046830244 | 0.816972332 |
| POSITIVE REGULATION OF LIGASE ACTIVITY                                                              | 101 | -0.096770777 | 0.224357047 |
| LACTATE TRANSMEMBRANE TRANSPORT                                                                     | 9   | -0.488690881 | 0.031381859 |
| REGULATION OF TRANSCRIPTION FROM RNA POLYMERASE II PROMOTER IN RESPONSE TO HYPOXIA                  | 29  | 0.247444774  | 0.115826037 |
| REGULATION OF INTRACELLULAR PROTEIN TRANSPORT                                                       | 337 | -0.072261303 | 0.103052145 |
| PIGMENT GRANULE ORGANIZATION                                                                        | 21  | 0.134517554  | 0.459307202 |
| REGULATION OF INTERLEUKIN 13 PRODUCTION                                                             | 15  | 0.412551827  | 0.062513127 |
| REGULATION OF CELL CYCLE                                                                            | 868 | -0.047951156 | 0.090532546 |
| TUBE DEVELOPMENT                                                                                    | 486 | -0.003776349 | 0.920187981 |
| LOCOMOTION                                                                                          | 955 | 0.009527304  | 0.728043374 |
| ACROSOME ASSEMBLY                                                                                   | 9   | -0.005028083 | 0.985276084 |
| REGULATION OF INOSITOL PHOSPHATE BIOSYNTHETIC PROCESS                                               | 11  | 0.094680545  | 0.704909463 |
| REGULATION OF INTRINSIC APOPTOTIC SIGNALING PATHWAY IN RESPONSE TO DNA DAMAGE BY P53 CLASS MEDIATOR | 14  | -0.164114953 | 0.429294304 |
| POSITIVE REGULATION OF EPIDERMIS DEVELOPMENT                                                        | 28  | 0.200490567  | 0.203936772 |
| RESPONSE TO EXTRACELLULAR STIMULUS                                                                  | 389 | 0.009783164  | 0.816259189 |
| REGULATION OF PROTEIN COMPLEX ASSEMBLY                                                              | 334 | 0.078415739  | 0.087571935 |
| CALCIUM ION REGULATED EXOCYTOSIS OF NEUROTRANSMITTER                                                | 24  | 0.03178504   | 0.850092836 |
| REGULATION OF REGULATED SECRETORY PATHWAY                                                           | 104 | -0.075343129 | 0.34021666  |
| POSITIVE REGULATION OF RECEPTOR INTERNALIZATION                                                     | 21  | -0.003483501 | 0.98442968  |
| CARDIAC MUSCLE CELL CONTRACTION                                                                     | 24  | -0.166738761 | 0.296891113 |
| AMINO SUGAR CATABOLIC PROCESS                                                                       | 9   | 0.29691469   | 0.287235571 |
| POSITIVE REGULATION OF MACROPHAGE CHEMOTAXIS                                                        | 10  | 0.02669579   | 0.918263058 |
| REGULATION OF B CELL APOPTOTIC PROCESS                                                              | 17  | -0.328510695 | 0.069294325 |
| MITOCHONDRIAL RNA METABOLIC PROCESS                                                                 | 27  | -0.029566484 | 0.850139988 |
| MODULATION OF EXCITATORY POSTSYNAPTIC POTENTIAL                                                     | 24  | -0.039599187 | 0.810928398 |
| NUCLEUS LOCALIZATION                                                                                | 19  | 0.110992387  | 0.562947419 |
| RESPONSE TO HEPATOCYTE GROWTH FACTOR                                                                | 12  | -0.200060093 | 0.363934952 |
| REGULATION OF SYNAPTIC VESICLE EXOCYTOSIS                                                           | 17  | -0.009467342 | 0.961882074 |
| ORGANELLE ASSEMBLY                                                                                  | 431 | -0.038732403 | 0.328593211 |
| MITOTIC DNA INTEGRITY CHECKPOINT                                                                    | 95  | -0.102527768 | 0.21189492  |
| FATTY ACID DERIVATIVE TRANSPORT                                                                     | 17  | 0.015394753  | 0.938381065 |
| NATURAL KILLER CELL ACTIVATION INVOLVED IN IMMUNE RESPONSE                                          | 12  | 0.086828705  | 0.716833551 |
| CARDIAC VENTRICLE DEVELOPMENT                                                                       | 96  | 0.079412943  | 0.350107653 |
| MALE MEIOSIS I                                                                                      | 12  | -0.130573648 | 0.565274331 |

|                                                                         |     |              |             |
|-------------------------------------------------------------------------|-----|--------------|-------------|
| GLYCEROLIPID BIOSYNTHETIC PROCESS                                       | 183 | -0.064714136 | 0.279901847 |
| REGULATION OF GLUCOSE METABOLIC PROCESS                                 | 94  | -0.074233257 | 0.371751935 |
| POSITIVE REGULATION OF SODIUM ION TRANSMEMBRANE TRANSPORT               | 15  | -0.070718577 | 0.733717759 |
| POSITIVE REGULATION OF HEART CONTRACTION                                | 30  | 0.255065051  | 0.089870894 |
| CELLULAR RESPONSE TO PROSTAGLANDIN E STIMULUS                           | 17  | 0.4023312    | 0.034127383 |
| EXTRINSIC APOPTOTIC SIGNALING PATHWAY VIA DEATH DOMAIN RECEPTORS        | 35  | -0.210051684 | 0.106139174 |
| PURINE NUCLEOSIDE BIOSYNTHETIC PROCESS                                  | 78  | -0.0932614   | 0.303470105 |
| FEMALE SEX DIFFERENTIATION                                              | 98  | -0.016140439 | 0.845084093 |
| POSITIVE REGULATION OF CIRCADIAN RHYTHM                                 | 14  | 0.285019554  | 0.191018916 |
| ECTODERMAL PLACODE DEVELOPMENT                                          | 12  | -0.279424854 | 0.199872756 |
| POSITIVE REGULATION OF PHAGOCYTOSIS                                     | 37  | 0.154062138  | 0.260625614 |
| CELLULAR RESPONSE TO ETHANOL                                            | 13  | 0.095782533  | 0.677076802 |
| RESPIRATORY BURST                                                       | 10  | -0.066426937 | 0.793879449 |
| POSITIVE REGULATION OF DNA REPAIR                                       | 35  | 0.10646378   | 0.450023345 |
| CEREBRAL CORTEX GABAERGIC INTERNEURON DIFFERENTIATION                   | 7   | -0.029278863 | 0.924075995 |
| NIK NF KAPPA B SIGNALING                                                | 79  | -0.167471593 | 0.056821008 |
| MAMMARY GLAND DEVELOPMENT                                               | 102 | -0.075498108 | 0.344156531 |
| NEGATIVE REGULATION OF SECRETION                                        | 161 | 0.0144571    | 0.824013072 |
| MITOTIC SPINDLE ORGANIZATION                                            | 64  | -0.124752328 | 0.209755785 |
| REGULATION OF PROTEIN CATABOLIC PROCESS                                 | 370 | -0.02742516  | 0.521732778 |
| REGULATION OF CD4 POSITIVE ALPHA BETA T CELL ACTIVATION                 | 33  | 0.142501442  | 0.327443802 |
| MAINTENANCE OF CELL POLARITY                                            | 11  | 0.138428728  | 0.581541575 |
| MRNA CLEAVAGE                                                           | 20  | -0.057025269 | 0.752198114 |
| POSITIVE REGULATION OF URINE VOLUME                                     | 12  | 0.092207977  | 0.700395698 |
| GLYCINE METABOLIC PROCESS                                               | 16  | 0.148806936  | 0.474489815 |
| POSITIVE REGULATION OF CHEMOKINE PRODUCTION                             | 40  | -0.171832372 | 0.164381785 |
| REGULATION OF GLYCOGEN METABOLIC PROCESS                                | 30  | -0.07465146  | 0.610991097 |
| ESTABLISHMENT OF NUCLEUS LOCALIZATION                                   | 14  | 0.12080728   | 0.589806383 |
| ENDODERM DEVELOPMENT                                                    | 66  | -0.219297446 | 0.020816277 |
| VESICLE COATING                                                         | 72  | -0.099082122 | 0.292983155 |
| CYTOPLASMIC SEQUESTERING OF TRANSCRIPTION FACTOR                        | 19  | 0.263930403  | 0.1765662   |
| PROTEIN TRANSPORT ALONG MICROTUBULE                                     | 23  | -0.042824933 | 0.799973491 |
| AUDITORY RECEPTOR CELL DIFFERENTIATION                                  | 22  | -0.1231718   | 0.465343324 |
| REGULATION OF LIPOPOLYSACCHARIDE MEDIATED SIGNALING PATHWAY             | 17  | -0.223809157 | 0.22603016  |
| CAMERA TYPE EYE PHOTORECEPTOR CELL DIFFERENTIATION                      | 11  | 0.042667255  | 0.863806787 |
| REGULATION OF GROWTH HORMONE SECRETION                                  | 8   | -0.260966352 | 0.327630088 |
| PYRIMIDINE CONTAINING COMPOUND METABOLIC PROCESS                        | 68  | -0.204457831 | 0.028503967 |
| MICROGLIAL CELL ACTIVATION                                              | 10  | 0.200868112  | 0.44049878  |
| OXIDATION REDUCTION PROCESS                                             | 749 | -0.014903163 | 0.62588443  |
| RESPONSE TO ATP                                                         | 24  | -0.340344928 | 0.019314443 |
| WATER HOMEOSTASIS                                                       | 50  | 0.034488864  | 0.767531691 |
| VOCALIZATION BEHAVIOR                                                   | 13  | 0.064174995  | 0.779778998 |
| GOLGI TO PLASMA MEMBRANE PROTEIN TRANSPORT                              | 23  | -0.078320083 | 0.640187606 |
| LONG TERM MEMORY                                                        | 21  | -0.058206767 | 0.741052401 |
| ADRENAL GLAND DEVELOPMENT                                               | 17  | -0.023333559 | 0.90595287  |
| CELLULAR RESPONSE TO CHOLESTEROL                                        | 11  | 0.34026419   | 0.167908959 |
| POSITIVE REGULATION OF POTASSIUM ION TRANSMEMBRANE TRANSPORTER ACTIVITY | 13  | -0.070470869 | 0.75220938  |
| VIRAL LIFE CYCLE                                                        | 282 | -0.007034643 | 0.886078744 |
| REGULATION OF SMOOTH MUSCLE CELL MIGRATION                              | 46  | 0.031923242  | 0.792832815 |
| ENTRAINMENT OF CIRCADIAN CLOCK                                          | 23  | -0.170477023 | 0.298123961 |
| REGULATION OF CGMP METABOLIC PROCESS                                    | 21  | 0.079998043  | 0.65828278  |
| REGULATION OF CYTOKINE SECRETION                                        | 111 | 0.057338452  | 0.466617069 |
| CELLULAR RESPONSE TO AMINO ACID STARVATION                              | 25  | -0.111060661 | 0.484653973 |
| POSITIVE REGULATION OF IMMUNOGLOBULIN PRODUCTION                        | 27  | -0.111354995 | 0.46743824  |
| REGULATION OF ESTABLISHMENT OF PROTEIN LOCALIZATION TO MITOCHONDRION    | 109 | -0.125190445 | 0.099572805 |
| REGULATION OF SENSORY PERCEPTION                                        | 30  | -0.026043895 | 0.86086553  |
| REGULATION OF REGULATORY T CELL DIFFERENTIATION                         | 10  | -0.002017574 | 0.993776379 |
| CHONDROITIN SULFATE CATABOLIC PROCESS                                   | 14  | 0.056976267  | 0.796423705 |
| RESPONSE TO AUDITORY STIMULUS                                           | 16  | -0.271276585 | 0.14742889  |
| PRESYNAPTIC PROCESS INVOLVED IN SYNAPTIC TRANSMISSION                   | 89  | -0.001759751 | 0.983850139 |
| PROTEIN UBIQUITINATION                                                  | 570 | -0.022547787 | 0.516645032 |
| MAINTENANCE OF CELL NUMBER                                              | 123 | 0.013341998  | 0.857428747 |
| CELL MORPHOGENESIS INVOLVED IN DIFFERENTIATION                          | 454 | 0.081435342  | 0.039500396 |
| NEGATIVE REGULATION OF CHROMOSOME ORGANIZATION                          | 91  | -0.107850862 | 0.197249413 |

|                                                                     |     |              |             |
|---------------------------------------------------------------------|-----|--------------|-------------|
| COENZYME BIOSYNTHETIC PROCESS                                       | 110 | -0.11467801  | 0.130881278 |
| EPIBOLY                                                             | 19  | -0.073565633 | 0.690250267 |
| NEGATIVE REGULATION OF INFLAMMATORY RESPONSE                        | 81  | 0.12649166   | 0.172699318 |
| REGULATION OF CALCIUM ION DEPENDENT EXOCYTOSIS                      | 65  | -0.01380761  | 0.891656938 |
| CENTRAL NERVOUS SYSTEM PROJECTION NEURON AXONOGENESIS               | 19  | -0.001362435 | 0.99420952  |
| INFLAMMATORY RESPONSE TO ANTIGENIC STIMULUS                         | 20  | 0.068667388  | 0.710598727 |
| INTESTINAL EPITHELIAL CELL DIFFERENTIATION                          | 16  | 0.061470633  | 0.766482165 |
| ORGANOPHOSPHATE CATABOLIC PROCESS                                   | 103 | 0.038405676  | 0.63747119  |
| NEGATIVE REGULATION OF BEHAVIOR                                     | 9   | 0.395200818  | 0.125823839 |
| POSITIVE REGULATION OF P38MAPK CASCADE                              | 12  | 0.299543186  | 0.209280428 |
| MEMBRANE PROTEIN INTRACELLULAR DOMAIN PROTEOLYSIS                   | 14  | -0.394657478 | 0.040553316 |
| POSITIVE REGULATION OF CHROMATIN MODIFICATION                       | 81  | -0.119552344 | 0.175487425 |
| RESPONSE TO CAFFEINE                                                | 18  | -0.310187103 | 0.073707518 |
| DISTAL TUBULE DEVELOPMENT                                           | 9   | 0.493316506  | 0.045206881 |
| CRANIAL SKELETAL SYSTEM DEVELOPMENT                                 | 51  | 0.047973789  | 0.67863966  |
| DNA TEMPLATED TRANSCRIPTION INITIATION                              | 189 | 0.096961529  | 0.11107605  |
| REGULATION OF HORMONE BIOSYNTHETIC PROCESS                          | 15  | 0.290858422  | 0.171705561 |
| DEOXYRIBONUCLEOTIDE METABOLIC PROCESS                               | 33  | 0.027946655  | 0.84543062  |
| POSITIVE REGULATION OF NEUROTRANSMITTER SECRETION                   | 10  | -0.172653338 | 0.481543592 |
| GENETIC IMPRINTING                                                  | 15  | 0.229641206  | 0.280939495 |
| CELLULAR PROCESS INVOLVED IN REPRODUCTION IN MULTICELLULAR ORGANISM | 193 | 0.08284903   | 0.168146777 |
| POSITIVE REGULATION OF CELL DEATH                                   | 536 | -0.028953688 | 0.418138699 |
| TROPHOBLAST GIANT CELL DIFFERENTIATION                              | 12  | 0.003459807  | 0.988323818 |
| ER ASSOCIATED UBIQUITIN DEPENDENT PROTEIN CATABOLIC PROCESS         | 58  | -0.247246801 | 0.013877052 |
| ISOTYPE SWITCHING                                                   | 15  | -0.34555672  | 0.074254438 |
| TUMOR NECROSIS FACTOR MEDIATED SIGNALING PATHWAY                    | 103 | -0.144767155 | 0.062373807 |
| DEFENSE RESPONSE TO GRAM NEGATIVE BACTERIUM                         | 31  | -0.051723891 | 0.721763148 |
| SIGNAL RELEASE                                                      | 133 | -0.020988023 | 0.767254261 |
| REGULATION OF EXOSOMAL SECRETION                                    | 16  | 0.218768259  | 0.308566735 |
| REGULATION OF INCLUSION BODY ASSEMBLY                               | 14  | 0.101792652  | 0.647027662 |
| REGULATION OF CHRONIC INFLAMMATORY RESPONSE                         | 10  | -0.053302898 | 0.834748657 |
| REGULATION OF T CELL DIFFERENTIATION                                | 95  | 0.058811289  | 0.48956502  |
| ADAPTIVE IMMUNE RESPONSE                                            | 192 | -0.003771118 | 0.949350996 |
| TRANSLATION SYNTHESIS                                               | 39  | -0.083629936 | 0.515771486 |
| REGULATION OF GLOMERULUS DEVELOPMENT                                | 13  | 0.010443318  | 0.963382247 |
| METHIONINE METABOLIC PROCESS                                        | 17  | 0.014249402  | 0.942946412 |
| DICARBOXYLIC ACID TRANSPORT                                         | 61  | -0.18122908  | 0.068298408 |
| NEGATIVE REGULATION OF SKELETAL MUSCLE TISSUE DEVELOPMENT           | 10  | 0.416681648  | 0.098308707 |
| DNA RECOMBINATION                                                   | 187 | -0.040343852 | 0.498756414 |
| POST TRANSLATIONAL PROTEIN MODIFICATION                             | 31  | -0.004967233 | 0.97302813  |
| PROTEIN FOLDING                                                     | 197 | -0.114098824 | 0.045340904 |
| GLYCOSPHINGOLIPID METABOLIC PROCESS                                 | 61  | 0.004144921  | 0.968524194 |
| REGULATION OF MRNA POLYADENYLATION                                  | 11  | -0.119525659 | 0.617019755 |
| NEURON MIGRATION                                                    | 95  | -0.140140275 | 0.083406259 |
| REGULATION OF ATTACHMENT OF SPINDLE MICROTUBULES TO KINETOCHORE     | 11  | 0.245509568  | 0.337469688 |
| POSITIVE REGULATION OF RESPONSE TO TUMOR CELL                       | 7   | -0.226945463 | 0.425527115 |
| REGULATION OF ACTION POTENTIAL                                      | 32  | -0.137486542 | 0.325049418 |
| REGULATION OF NF KAPPAB IMPORT INTO NUCLEUS                         | 42  | 0.123005053  | 0.339586647 |
| POSITIVE REGULATION OF TISSUE REMODELING                            | 24  | 0.086430648  | 0.610710072 |
| REGULATION OF PROTEASOMAL PROTEIN CATABOLIC PROCESS                 | 173 | -0.015750821 | 0.800527648 |
| DORSAL VENTRAL NEURAL TUBE PATTERNING                               | 16  | -0.045818781 | 0.820957103 |
| TOLL LIKE RECEPTOR 4 SIGNALING PATHWAY                              | 14  | 0.139200415  | 0.530813704 |
| POSITIVE REGULATION OF MYELOID CELL DIFFERENTIATION                 | 71  | 0.053220514  | 0.58815864  |
| CALCIUM ION REGULATED EXOCYTOSIS                                    | 64  | -0.005111677 | 0.960170468 |
| CELLULAR RESPONSE TO NITROGEN COMPOUND                              | 452 | -0.065623976 | 0.088193523 |
| RETINAL METABOLIC PROCESS                                           | 11  | 0.152007323  | 0.544465221 |
| MOLTING CYCLE                                                       | 73  | 0.099430569  | 0.307701714 |
| CHROMOSOME ORGANIZATION INVOLVED IN MEIOTIC CELL CYCLE              | 40  | 0.21984667   | 0.095237949 |
| POSITIVE REGULATION OF PEPTIDYL THREONINE PHOSPHORYLATION           | 23  | 0.12487257   | 0.472614984 |
| OOCYTE MATURATION                                                   | 14  | 0.12257962   | 0.581839822 |
| DNA BIOSYNTHETIC PROCESS                                            | 107 | -0.03802905  | 0.628861541 |
| SUBSTRATE ADHESION DEPENDENT CELL SPREADING                         | 35  | -0.124525913 | 0.352293883 |
| SPERMATID NUCLEUS DIFFERENTIATION                                   | 13  | -0.10807145  | 0.624085794 |
| MULTI ORGANISM LOCALIZATION                                         | 66  | -0.048101593 | 0.629966203 |
| NEGATIVE REGULATION OF CELL DEATH                                   | 770 | -0.031234225 | 0.298957409 |

|                                                                                    |      |              |             |
|------------------------------------------------------------------------------------|------|--------------|-------------|
| TRANSCRIPTION INITIATION FROM RNA POLYMERASE II PROMOTER                           | 142  | 0.06095427   | 0.382267808 |
| POSITIVE REGULATION OF DEVELOPMENTAL GROWTH                                        | 143  | 0.015517503  | 0.821945987 |
| REGULATION OF ERYTHROCYTE DIFFERENTIATION                                          | 33   | 0.002533593  | 0.985828052 |
| METANEPHRIC NEPHRON DEVELOPMENT                                                    | 26   | 0.096423343  | 0.554162984 |
| POSITIVE REGULATION OF NEUROLOGICAL SYSTEM PROCESS                                 | 20   | 0.254661773  | 0.171095573 |
| TRACHEA DEVELOPMENT                                                                | 19   | 0.123895148  | 0.519170865 |
| NEUROGENESIS                                                                       | 1216 | 0.031752204  | 0.196882667 |
| POSITIVE REGULATION OF T HELPER CELL DIFFERENTIATION                               | 16   | -0.02758949  | 0.8920602   |
| POSITIVE REGULATION OF SEQUENCE SPECIFIC DNA BINDING TRANSCRIPTION FACTOR ACTIVITY | 201  | 0.051941677  | 0.375938916 |
| NEGATIVE REGULATION OF HUMORAL IMMUNE RESPONSE                                     | 12   | 0.067546911  | 0.777577603 |
| POSITIVE REGULATION OF AMINE TRANSPORT                                             | 25   | 0.156877822  | 0.347157467 |
| ENDOMEMBRANE SYSTEM ORGANIZATION                                                   | 432  | 0.003393122  | 0.932331222 |
| APOPTOTIC PROCESS INVOLVED IN DEVELOPMENT                                          | 19   | 0.333454388  | 0.070261375 |
| RESPONSE TO LOW DENSITY LIPOPROTEIN PARTICLE                                       | 13   | -0.244703042 | 0.250861974 |
| RETINOIC ACID METABOLIC PROCESS                                                    | 15   | 0.280722309  | 0.18074979  |
| GLYCEROPHOSPHOLIPID METABOLIC PROCESS                                              | 254  | 0.00605256   | 0.907036554 |
| REGULATION OF PROTEIN ACETYLATION                                                  | 59   | 0.011698064  | 0.912916943 |
| REGULATION OF NEUROLOGICAL SYSTEM PROCESS                                          | 58   | 0.141077184  | 0.197712711 |
| INTRINSIC APOPTOTIC SIGNALING PATHWAY                                              | 140  | -0.01083733  | 0.875723349 |
| SODIUM ION HOMEOSTASIS                                                             | 24   | 0.329542703  | 0.048888411 |
| CELLULAR RESPONSE TO HEAT                                                          | 32   | -0.415610911 | 0.001178483 |
| T CELL RECEPTOR SIGNALING PATHWAY                                                  | 124  | -0.137658268 | 0.0527703   |
| POSITIVE REGULATION OF LAMELLIPODIUM ASSEMBLY                                      | 15   | 0.171812241  | 0.43147224  |
| PURINE NUCLEOTIDE TRANSPORT                                                        | 10   | -0.180248477 | 0.465236278 |
| REGULATION OF PROTEIN STABILITY                                                    | 206  | -0.01566743  | 0.78413038  |
| REGULATION OF DNA METABOLIC PROCESS                                                | 309  | -0.018504491 | 0.692762909 |
| NADH METABOLIC PROCESS                                                             | 30   | 0.309206661  | 0.041750424 |
| POSITIVE REGULATION OF NUCLEOCYTOPLASMIC TRANSPORT                                 | 109  | 0.013859264  | 0.860500668 |
| REGULATION OF BLOOD VESSEL ENDOTHELIAL CELL MIGRATION                              | 49   | 0.022724079  | 0.84677107  |
| NATURAL KILLER CELL MEDIATED IMMUNITY                                              | 20   | 0.291347026  | 0.111639074 |
| TELOMERE MAINTENANCE VIA TELOMERASE                                                | 16   | -0.073288949 | 0.715608861 |
| REGULATION OF GRANULOCYTE MACROPHAGE COLONY STIMULATING FACTOR PRODUCTION          | 14   | 0.155307613  | 0.484235095 |
| GROWTH                                                                             | 353  | 0.048804676  | 0.272421664 |
| EMBRYONIC MORPHOGENESIS                                                            | 468  | -0.071546858 | 0.058408196 |
| LIPID PARTICLE ORGANIZATION                                                        | 14   | 0.213208518  | 0.335657793 |
| NEGATIVE REGULATION OF MULTICELLULAR ORGANISM GROWTH                               | 11   | 0.094105276  | 0.707669271 |
| NEGATIVE REGULATION OF LYMPHOCYTE APOPTOTIC PROCESS                                | 25   | -0.0208644   | 0.898127484 |
| OOCYTE DIFFERENTIATION                                                             | 31   | 0.083598821  | 0.574999092 |
| JAK STAT CASCADE INVOLVED IN GROWTH HORMONE SIGNALING PATHWAY                      | 14   | -0.2833945   | 0.155591408 |
| INTERSTRAND CROSS LINK REPAIR                                                      | 41   | -0.054112782 | 0.668411998 |
| REGULATION OF STEM CELL POPULATION MAINTENANCE                                     | 15   | 0.136965077  | 0.524649338 |
| POSITIVE REGULATION OF TELOMERE MAINTENANCE VIA TELOMERE LENGTHENING               | 30   | -0.01052036  | 0.943769301 |
| GANGLIOSIDE BIOSYNTHETIC PROCESS                                                   | 16   | -0.050311635 | 0.803369218 |
| POSITIVE REGULATION OF ENDOPLASMIC RETICULUM UNFOLDED PROTEIN RESPONSE             | 13   | -0.06934342  | 0.756088469 |
| ANDROGEN METABOLIC PROCESS                                                         | 23   | -0.065222469 | 0.697605238 |
| NEGATIVE REGULATION OF EPIDERMIS DEVELOPMENT                                       | 15   | 0.309041769  | 0.146054479 |
| INDOLE CONTAINING COMPOUND METABOLIC PROCESS                                       | 22   | 0.20971117   | 0.236712291 |
| NEGATIVE REGULATION OF T CELL PROLIFERATION                                        | 44   | -0.041967645 | 0.731490577 |
| REGULATION OF T CELL CYTOKINE PRODUCTION                                           | 19   | 0.067032843  | 0.72408006  |
| REGULATION OF CHEMOKINE BIOSYNTHETIC PROCESS                                       | 11   | -0.230253923 | 0.309034682 |
| POSITIVE REGULATION OF CARTILAGE DEVELOPMENT                                       | 24   | -0.191585173 | 0.221231787 |
| MUSCLE ATROPHY                                                                     | 8    | -0.135650622 | 0.624433964 |
| REGULATION OF INSULIN SECRETION INVOLVED IN CELLULAR RESPONSE TO GLUCOSE STIMULUS  | 41   | 0.144363952  | 0.267426794 |
| NEGATIVE REGULATION OF CANONICAL WNT SIGNALING PATHWAY                             | 147  | 0.036431719  | 0.593658407 |
| REGULATION OF CELLULAR RESPONSE TO TRANSFORMING GROWTH FACTOR BETA STIMULUS        | 91   | 0.178230523  | 0.0433138   |
| PHOSPHATIDYLINOSITOL DEPHOSPHORYLATION                                             | 22   | -0.136200769 | 0.417073375 |
| DIGESTIVE SYSTEM PROCESS                                                           | 50   | 0.168445988  | 0.15660689  |
| CALCIUM ION TRANSPORT                                                              | 181  | 0.059135153  | 0.338908826 |
| ANTIGEN PROCESSING AND PRESENTATION OF EXOGENOUS PEPTIDE ANTIGEN VIA MHC CLASS I   | 59   | -0.293180835 | 0.002320363 |

|                                                                  |      |              |             |
|------------------------------------------------------------------|------|--------------|-------------|
| NEGATIVE REGULATION OF CATALYTIC ACTIVITY                        | 694  | -0.049447307 | 0.116061054 |
| PYRIMIDINE NUCLEOSIDE TRIPHOSPHATE METABOLIC PROCESS             | 19   | -0.368477338 | 0.026777237 |
| CARDIAC MUSCLE TISSUE DEVELOPMENT                                | 123  | 0.045668776  | 0.541085547 |
| LEUKOCYTE APOPTOTIC PROCESS                                      | 22   | 0.262968416  | 0.139510374 |
| NEGATIVE REGULATION OF EMBRYONIC DEVELOPMENT                     | 23   | 0.098488964  | 0.57031909  |
| POSITIVE REGULATION OF NUCLEOTIDE METABOLIC PROCESS              | 98   | 0.132466103  | 0.116713243 |
| PEPTIDYL GLUTAMIC ACID MODIFICATION                              | 24   | 0.05969765   | 0.723773873 |
| REGULATION OF NOTCH SIGNALING PATHWAY                            | 61   | 0.180348615  | 0.092439122 |
| INTERFERON GAMMA MEDIATED SIGNALING PATHWAY                      | 60   | -0.020747813 | 0.843840613 |
| POSITIVE REGULATION OF CYTOKINE SECRETION                        | 74   | 0.185900674  | 0.055330279 |
| NEGATIVE REGULATION OF MAST CELL ACTIVATION                      | 8    | -0.327000004 | 0.197692803 |
| MICROTUBULE BUNDLE FORMATION                                     | 56   | 0.160986904  | 0.1498187   |
| NEGATIVE REGULATION OF CYSTEINE TYPE ENDOPEPTIDASE ACTIVITY      | 81   | -0.162059384 | 0.062453579 |
| EMBRYONIC SKELETAL JOINT DEVELOPMENT                             | 13   | -0.118332433 | 0.5893453   |
| RESPONSE TO CARBOHYDRATE                                         | 147  | -0.058566255 | 0.381128797 |
| ORGANIC ACID TRANSMEMBRANE TRANSPORT                             | 84   | -0.080221454 | 0.360366034 |
| SYSTEM PROCESS                                                   | 1087 | 0.04618145   | 0.075336867 |
| REGULATION OF TUMOR NECROSIS FACTOR BIOSYNTHETIC PROCESS         | 15   | -0.140807286 | 0.488442197 |
| REGULATION OF PROTEIN MATURATION                                 | 66   | 0.082882602  | 0.417903381 |
| MONOCARBOXYLIC ACID BIOSYNTHETIC PROCESS                         | 133  | 0.013461272  | 0.850550695 |
| COLUMNAR CUBOIDAL EPITHELIAL CELL DEVELOPMENT                    | 42   | -0.136224457 | 0.264105954 |
| POSITIVE REGULATION OF VASCULAR PERMEABILITY                     | 8    | -0.170768299 | 0.531224858 |
| EAR MORPHOGENESIS                                                | 90   | 0.009463713  | 0.913038062 |
| MOVEMENT OF CELL OR SUBCELLULAR COMPONENT                        | 1088 | 0.008334917  | 0.746503309 |
| NEURON CELL CELL ADHESION                                        | 13   | -0.073077138 | 0.742622847 |
| TERMINATION OF RNA POLYMERASE II TRANSCRIPTION                   | 61   | -0.259277694 | 0.006952727 |
| CELLULAR RESPONSE TO NITROGEN LEVELS                             | 9    | 0.352113614  | 0.181740334 |
| SYNAPTIC SIGNALING                                               | 314  | 0.081305855  | 0.085630496 |
| MITOTIC CELL CYCLE CHECKPOINT                                    | 133  | -0.113361672 | 0.10169368  |
| RESPONSE TO LIPID                                                | 754  | 0.059206342  | 0.055341394 |
| RESPONSE TO NICOTINE                                             | 36   | -0.128782795 | 0.329198984 |
| NEGATIVE REGULATION OF MACROAUTOPHAGY                            | 21   | -0.193500615 | 0.250459581 |
| POSITIVE REGULATION OF GLYCOPROTEIN METABOLIC PROCESS            | 18   | -0.260156554 | 0.145009754 |
| REGULATION OF MITOPHAGY                                          | 39   | -0.203956781 | 0.099783582 |
| FATTY ACID METABOLIC PROCESS                                     | 235  | 0.065935584  | 0.225529598 |
| ACTIVATION OF IMMUNE RESPONSE                                    | 333  | -0.020821307 | 0.644520796 |
| VASCULATURE DEVELOPMENT                                          | 424  | 0.003953523  | 0.92190745  |
| POSITIVE REGULATION OF PROTEIN METABOLIC PROCESS                 | 1298 | -0.026722033 | 0.258215756 |
| CELL CYCLE G2 M PHASE TRANSITION                                 | 137  | -0.120952957 | 0.075955931 |
| NEGATIVE REGULATION OF CYTOKINE SECRETION                        | 33   | -0.039677711 | 0.778726019 |
| VITAMIN TRANSPORT                                                | 29   | -0.004173238 | 0.978083714 |
| REGULATION OF CYSTEINE TYPE ENDOPEPTIDASE ACTIVITY INVOLVED IN   | 22   | -0.25204253  | 0.113975008 |
| APOPTOTIC SIGNALING PATHWAY                                      | 13   | -0.070618051 | 0.751274767 |
| BLASTODERM SEGMENTATION                                          | 34   | -0.065488838 | 0.635478046 |
| NATURAL KILLER CELL ACTIVATION                                   | 122  | -0.042011807 | 0.568349119 |
| NEGATIVE REGULATION OF BINDING                                   | 11   | -0.009814805 | 0.968199897 |
| POSITIVE REGULATION BY HOST OF VIRAL PROCESS                     | 43   | -0.047152606 | 0.702688645 |
| POSITIVE REGULATION OF RESPONSE TO EXTRACELLULAR STIMULUS        | 42   | -0.296464113 | 0.010034389 |
| POSITIVE REGULATION OF CALCIUM ION TRANSPORT INTO CYTOSOL        | 57   | 0.168389328  | 0.129642161 |
| REGULATION OF SMOOTHENED SIGNALING PATHWAY                       | 19   | -0.102489587 | 0.574648956 |
| RETINA LAYER FORMATION                                           | 195  | 0.107948979  | 0.072044617 |
| EPIDERMIS DEVELOPMENT                                            | 14   | -0.045260487 | 0.834222758 |
| CELLULAR RESPONSE TO ZINC ION                                    | 32   | 0.318013126  | 0.0282209   |
| REGULATION OF GASTRULATION                                       | 49   | -0.254193939 | 0.018564116 |
| CELLULAR RESPONSE TO IONIZING RADIATION                          | 59   | -0.075023006 | 0.473606584 |
| ACTIN MEDIATED CELL CONTRACTION                                  | 219  | -0.114625177 | 0.034065591 |
| POSITIVE REGULATION OF INNATE IMMUNE RESPONSE                    | 12   | -0.085497594 | 0.711226205 |
| POSITIVE REGULATION OF NEUROTRANSMITTER TRANSPORT                | 25   | -0.017649483 | 0.913826667 |
| NEUTRAL LIPID BIOSYNTHETIC PROCESS                               | 37   | -0.124036165 | 0.34113045  |
| CELLULAR RESPONSE TO NUTRIENT                                    | 35   | -0.110053671 | 0.414458149 |
| POSITIVE REGULATION OF GLUCOSE TRANSPORT                         | 9    | 0.315876689  | 0.258597071 |
| ADENYLATE CYCLASE ACTIVATING DOPAMINE RECEPTOR SIGNALING PATHWAY | 24   | 0.373543021  | 0.029341036 |
| REGULATION OF DIGESTIVE SYSTEM PROCESS                           | 69   | 0.069308954  | 0.488177922 |
| REGULATION OF PLASMA MEMBRANE ORGANIZATION                       | 104  | -0.093638843 | 0.23358227  |
| RESPONSE TO AMINO ACID                                           |      |              |             |

|                                                                  |     |              |             |
|------------------------------------------------------------------|-----|--------------|-------------|
| DETECTION OF BIOTIC STIMULUS                                     | 14  | -0.026431656 | 0.90322302  |
| RESPONSE TO VITAMIN A                                            | 18  | 0.431742763  | 0.015674566 |
| POSITIVE REGULATION OF LYMPHOCYTE DIFFERENTIATION                | 73  | -0.000661021 | 0.994503913 |
| POSITIVE REGULATION OF IMMUNOGLOBULIN SECRETION                  | 8   | -0.040115422 | 0.888749229 |
| SARCOPLASMIC RETICULUM CALCIUM ION TRANSPORT                     | 11  | 0.011301114  | 0.963553689 |
| VENTRICULAR SEPTUM DEVELOPMENT                                   | 50  | -0.10595894  | 0.348196638 |
| POSITIVE REGULATION OF LONG TERM SYNAPTIC POTENTIATION           | 11  | -0.0449027   | 0.854002864 |
| INSULIN RECEPTOR SIGNALING PATHWAY                               | 73  | -0.03176925  | 0.738798163 |
| VIRION ASSEMBLY                                                  | 36  | 0.428098757  | 0.002102111 |
| LIPID METABOLIC PROCESS                                          | 938 | 0.022972339  | 0.406872843 |
| REGULATION OF PROTEIN LOCALIZATION                               | 828 | -0.078231827 | 0.006563584 |
| GLYCEROPHOSPHOLIPID CATABOLIC PROCESS                            | 11  | -0.044532628 | 0.855365233 |
| NEGATIVE REGULATION OF CARBOHYDRATE METABOLIC PROCESS            | 42  | -0.048158395 | 0.700004446 |
| KERATAN SULFATE BIOSYNTHETIC PROCESS                             | 24  | -0.464424844 | 0.001047792 |
| NEGATIVE REGULATION OF CIRCADIAN RHYTHM                          | 13  | 0.056778586  | 0.804412249 |
| POSITIVE REGULATION OF LIPID CATABOLIC PROCESS                   | 21  | 0.265749611  | 0.139206326 |
| SIGNAL TRANSDUCTION BY P53 CLASS MEDIATOR                        | 119 | -0.071439059 | 0.334309983 |
| BLOOD VESSEL REMODELING                                          | 30  | 0.21387856   | 0.160200418 |
| POSITIVE REGULATION OF TYROSINE PHOSPHORYLATION OF STAT3 PROTEIN | 32  | 0.025937481  | 0.858566376 |
| TRIGLYCERIDE CATABOLIC PROCESS                                   | 14  | 0.491759541  | 0.011972703 |
| REGULATION OF SKELETAL MUSCLE ADAPTATION                         | 11  | 0.13792392   | 0.581792238 |
| GLIAL CELL MIGRATION                                             | 36  | -0.052427379 | 0.697245602 |
| MODULATION BY VIRUS OF HOST MORPHOLOGY OR PHYSIOLOGY             | 35  | -0.023252834 | 0.865909173 |
| PROTEIN K48 LINKED DEUBIQUITINATION                              | 18  | -0.593555663 | 0.000422215 |
| RNA SECONDARY STRUCTURE UNWINDING                                | 41  | -0.220658015 | 0.064913525 |
| ENDOPLASMIC RETICULUM CALCIUM ION HOMEOSTASIS                    | 18  | -0.261298548 | 0.13663138  |
| POSITIVE REGULATION OF RESPONSE TO WOUNDING                      | 131 | 0.152089434  | 0.03744062  |
| STEROID METABOLIC PROCESS                                        | 189 | 0.040334419  | 0.503867987 |
| DIVALENT INORGANIC CATION HOMEOSTASIS                            | 274 | 0.010088841  | 0.84001663  |
| REGULATION OF ANION TRANSMEMBRANE TRANSPORT                      | 24  | 0.242800875  | 0.153496975 |
| NEGATIVE REGULATION OF GLYCOPROTEIN METABOLIC PROCESS            | 14  | 0.223481083  | 0.316027797 |
| TOXIN TRANSPORT                                                  | 33  | -0.000488887 | 0.997263434 |
| DETECTION OF LIGHT STIMULUS                                      | 38  | 0.070297561  | 0.601245822 |
| REGULATION OF HISTONE PHOSPHORYLATION                            | 12  | -0.255537348 | 0.239959835 |
| REGULATION OF PROTEIN IMPORT                                     | 164 | 0.002516391  | 0.96876383  |
| NEUROLOGICAL SYSTEM PROCESS INVOLVED IN REGULATION OF SYSTEMIC   |     |              |             |
| ARTERIAL BLOOD PRESSURE                                          | 8   | 0.139725554  | 0.63473851  |
| NEGATIVE REGULATION OF RESPONSE TO CYTOKINE STIMULUS             | 40  | -0.004387582 | 0.972949134 |
| NEGATIVE REGULATION OF DEPHOSPHORYLATION                         | 71  | 0.070231603  | 0.47615072  |
| DRUG METABOLIC PROCESS                                           | 23  | -0.085561526 | 0.608040046 |
| CELLULAR RESPONSE TO CYTOKINE STIMULUS                           | 504 | -0.024663759 | 0.503534066 |
| FAT CELL DIFFERENTIATION                                         | 95  | -0.023274315 | 0.781094452 |
| RESPONSE TO ABIOTIC STIMULUS                                     | 875 | -0.056066438 | 0.046606486 |
| AMELOGENESIS                                                     | 13  | -0.227366719 | 0.28018908  |
| CELLULAR RESPONSE TO INORGANIC SUBSTANCE                         | 134 | -0.078895112 | 0.256851047 |
| RESPONSE TO PROGESTERONE                                         | 43  | -0.027476218 | 0.824851358 |
| REGULATION OF PROTON TRANSPORT                                   | 12  | -0.222320321 | 0.315455234 |
| REGULATION OF NEURON PROJECTION REGENERATION                     | 18  | 0.244509081  | 0.212437711 |
| NEGATIVE REGULATION OF INTERLEUKIN 8 PRODUCTION                  | 12  | -0.353747236 | 0.096975637 |
| POSITIVE REGULATION OF SMAD PROTEIN IMPORT INTO NUCLEUS          | 9   | -0.164318472 | 0.532123497 |
| GENE SILENCING                                                   | 191 | -0.130738536 | 0.023327645 |
| NEGATIVE REGULATION OF SMOOTH MUSCLE CONTRACTION                 | 13  | 0.189444398  | 0.410502981 |
| LEUKOCYTE ADHESION TO VASCULAR ENDOTHELIAL CELL                  | 13  | -0.175170918 | 0.413583018 |
| ZINC II ION TRANSPORT                                            | 22  | 0.046709786  | 0.790867615 |
| INTERLEUKIN 1 MEDIATED SIGNALING PATHWAY                         | 13  | -0.246691016 | 0.234308835 |
| POSITIVE REGULATION OF SMOOTH MUSCLE CELL MIGRATION              | 28  | -0.00543793  | 0.971932034 |
| VENTRICULAR CARDIAC MUSCLE CELL ACTION POTENTIAL                 | 11  | 0.175402811  | 0.487102688 |
| RESPONSE TO FATTY ACID                                           | 73  | 0.188333168  | 0.053320422 |
| DNA METHYLATION INVOLVED IN GAMETE GENERATION                    | 13  | 0.336244446  | 0.128826332 |
| NUCLEOSIDE MONOPHOSPHATE BIOSYNTHETIC PROCESS                    | 77  | -0.161852391 | 0.069558744 |
| EPITHELIAL CELL APOPTOTIC PROCESS                                | 23  | -0.465009924 | 0.000959255 |
| DNA SYNTHESIS INVOLVED IN DNA REPAIR                             | 70  | -0.058592274 | 0.544404079 |
| COLUMNAR CUBOIDAL EPITHELIAL CELL DIFFERENTIATION                | 93  | 0.073256463  | 0.395393447 |
| RETROGRADE TRANSPORT ENDOSOME TO PLASMA MEMBRANE                 | 12  | 0.114339236  | 0.634779253 |
| TRANSFORMING GROWTH FACTOR BETA RECEPTOR SIGNALING PATHWAY       | 88  | 0.039367352  | 0.655148385 |
| DRUG TRANSPORT                                                   | 22  | 0.070860039  | 0.688713999 |

|                                                                   |     |              |             |
|-------------------------------------------------------------------|-----|--------------|-------------|
| POSITIVE REGULATION OF GROWTH                                     | 215 | -0.027253644 | 0.625587689 |
| NEGATIVE REGULATION OF CELL PROJECTION ORGANIZATION               | 131 | -0.048880912 | 0.490903258 |
| TISSUE REMODELING                                                 | 78  | 0.028639565  | 0.759128623 |
| REGULATION OF CYTOPLASMIC TRANSPORT                               | 417 | -0.079007036 | 0.047719958 |
| CD4 POSITIVE OR CD8 POSITIVE ALPHA BETA T CELL LINEAGE COMMITMENT | 8   | 0.187714938  | 0.532025919 |
| SEGMENT SPECIFICATION                                             | 13  | 0.339382512  | 0.130081863 |
| CELLULAR RESPONSE TO STEROL                                       | 13  | 0.390280097  | 0.079711037 |
| T CELL MIGRATION                                                  | 11  | 0.18807088   | 0.451305598 |
| OSSIFICATION                                                      | 222 | -0.010107414 | 0.854689634 |
| MULTI MULTICELLULAR ORGANISM PROCESS                              | 181 | -0.079467818 | 0.185215361 |
| REGULATION OF ENDOCYTOSIS                                         | 170 | 0.012483139  | 0.84356863  |
| REGULATION OF EPIDERMAL CELL DIFFERENTIATION                      | 38  | 0.071020823  | 0.597698328 |
| MYELOID LEUKOCYTE MEDIATED IMMUNITY                               | 37  | -0.387468151 | 0.00118961  |
| ACTION POTENTIAL                                                  | 74  | -0.070078633 | 0.454565629 |
| GOLGI TO VACUOLE TRANSPORT                                        | 26  | -0.225049119 | 0.138406648 |
| IMMUNOGLOBULIN PRODUCTION INVOLVED IN IMMUNOGLOBULIN              | 20  | -0.151370954 | 0.390856662 |
| MEDIATED IMMUNE RESPONSE                                          |     |              |             |
| NEGATIVE T CELL SELECTION                                         | 10  | 0.142303825  | 0.589893196 |
| LIPOPROTEIN LOCALIZATION                                          | 11  | 0.2287665    | 0.360649214 |
| REGULATION OF CYTOKINE BIOSYNTHETIC PROCESS                       | 76  | 0.069932993  | 0.463055711 |
| NEGATIVE REGULATION OF I KAPPAB KINASE NF KAPPAB SIGNALING        | 44  | -0.07398625  | 0.542090729 |
| DETECTION OF VISIBLE LIGHT                                        | 26  | -0.016151625 | 0.919584273 |
| REGULATION OF PROTEIN LOCALIZATION TO CHROMOSOME TELOMERIC        | 13  | -0.189152614 | 0.375411857 |
| REGION                                                            |     |              |             |
| NUCLEAR TRANSCRIBED MRNA CATABOLIC PROCESS DEADENYLATION          | 55  | -0.063549446 | 0.559159896 |
| DEPENDENT DECAY                                                   |     |              |             |
| HISTONE H3 K4 METHYLATION                                         | 28  | -0.148352944 | 0.316854976 |
| NEGATIVE REGULATION OF BLOOD PRESSURE                             | 33  | 0.174003304  | 0.229966002 |
| ALCOHOL METABOLIC PROCESS                                         | 293 | 0.044371048  | 0.361906806 |
| NEGATIVE REGULATION OF INTERLEUKIN 12 PRODUCTION                  | 12  | 0.096310166  | 0.687776656 |
| CELL SUBSTRATE JUNCTION ASSEMBLY                                  | 39  | -0.092625894 | 0.469458561 |
| MONOSACCHARIDE TRANSPORT                                          | 39  | -0.088288014 | 0.490929133 |
| REGULATION OF B CELL ACTIVATION                                   | 91  | -0.064651122 | 0.445190331 |
| REGULATION OF CELLULAR RESPONSE TO VASCULAR ENDOTHELIAL GROWTH    | 12  | 0.203019084  | 0.398346672 |
| FACTOR STIMULUS                                                   |     |              |             |
| REGULATION OF STEROL TRANSPORT                                    | 30  | 0.300880971  | 0.056099955 |
| POSITIVE REGULATION OF INTRACELLULAR SIGNAL TRANSDUCTION          | 764 | -0.062313618 | 0.037661452 |
| NEGATIVE REGULATION OF GROWTH                                     | 210 | 0.059856768  | 0.29768269  |
| NEGATIVE REGULATION OF MACROPHAGE DERIVED FOAM CELL               | 11  | 0.378844008  | 0.140301733 |
| DIFFERENTIATION                                                   |     |              |             |
| REGULATION OF SYSTEM PROCESS                                      | 417 | 0.092500607  | 0.024983196 |
| REGULATION OF CYTOSOLIC CALCIUM ION CONCENTRATION                 | 160 | 0.039651974  | 0.544993171 |
| REGULATION OF CARBOHYDRATE BIOSYNTHETIC PROCESS                   | 76  | -0.044396131 | 0.633434848 |
| RESPONSE TO BMP                                                   | 77  | 0.039241574  | 0.676923154 |
| IMIDAZOLE CONTAINING COMPOUND METABOLIC PROCESS                   | 9   | -0.060180643 | 0.822622629 |
| RESPONSE TO PH                                                    | 30  | -0.093234986 | 0.522119001 |
| SMALL MOLECULE CATABOLIC PROCESS                                  | 277 | 0.045534171  | 0.362699569 |
| OXALATE TRANSPORT                                                 | 7   | -0.301285059 | 0.266616024 |
| CELLULAR RESPONSE TO EXOGENOUS DSRNA                              | 12  | -0.296041034 | 0.159817803 |
| RESPONSE TO TEMPERATURE STIMULUS                                  | 123 | -0.050144805 | 0.493282197 |
| REGULATION OF TOR SIGNALING                                       | 67  | 0.009256708  | 0.926508854 |
| DNA REPLICATION CHECKPOINT                                        | 13  | -0.280467199 | 0.165593584 |
| RESPONSE TO ACETYLCHOLINE                                         | 14  | -0.403152759 | 0.03947991  |
| CELLULAR MODIFIED AMINO ACID METABOLIC PROCESS                    | 179 | 0.021597214  | 0.726631282 |
| REGULATION OF ISOTYPE SWITCHING                                   | 22  | -0.07736402  | 0.651289906 |
| CELLULAR GLUCOSE HOMEOSTASIS                                      | 67  | -0.187906845 | 0.047557297 |
| HEAD DEVELOPMENT                                                  | 619 | -0.017337196 | 0.604317671 |
| REGULATION OF HEMATOPOIETIC PROGENITOR CELL DIFFERENTIATION       | 37  | 0.150530046  | 0.271232765 |
| REGULATION OF VASCULAR ENDOTHELIAL GROWTH FACTOR PRODUCTION       | 30  | 0.06337076   | 0.675303254 |
| CYCLIC NUCLEOTIDE BIOSYNTHETIC PROCESS                            | 22  | 0.163361905  | 0.357086494 |
| REGULATION OF APPETITE                                            | 17  | 0.133532939  | 0.507244494 |
| PROTEIN DEGLYCOSYLATION                                           | 20  | -0.270433816 | 0.107687154 |
| POSITIVE REGULATION OF TRANSFORMING GROWTH FACTOR BETA            | 15  | -0.161089392 | 0.42324741  |
| PRODUCTION                                                        |     |              |             |
| REGULATION OF PHOSPHOLIPASE A2 ACTIVITY                           | 10  | 0.210508734  | 0.42176497  |
| RESPONSE TO VITAMIN D                                             | 32  | -0.042413109 | 0.767252527 |

|                                                                         |     |              |             |
|-------------------------------------------------------------------------|-----|--------------|-------------|
| TRANSLATIONAL ELONGATION                                                | 103 | -0.206445444 | 0.006489236 |
| REGULATION OF CELL SUBSTRATE ADHESION                                   | 161 | -0.048515966 | 0.449014492 |
| CYTOKINE SECRETION                                                      | 29  | -0.148719914 | 0.310098704 |
| POSITIVE REGULATION OF OXIDOREDUCTASE ACTIVITY                          | 41  | -0.039228404 | 0.757006198 |
| LYMPHOCYTE CHEMOTAXIS                                                   | 24  | 0.186211585  | 0.27021219  |
| MESODERMAL CELL DIFFERENTIATION                                         | 23  | -0.077815375 | 0.641777264 |
| METANEPHRIC MESENCHYME DEVELOPMENT                                      | 13  | 0.135526186  | 0.557819387 |
| BENZENE CONTAINING COMPOUND METABOLIC PROCESS                           | 19  | 0.249994983  | 0.184931347 |
| AUDITORY RECEPTOR CELL DEVELOPMENT                                      | 15  | -0.25345728  | 0.194397105 |
| REGULATION OF ACROSOME REACTION                                         | 12  | -0.295411338 | 0.172367237 |
| NEURONAL STEM CELL POPULATION MAINTENANCE                               | 17  | 0.110320057  | 0.585143952 |
| ORGANIC CYCLIC COMPOUND CATABOLIC PROCESS                               | 392 | -0.060107439 | 0.145533924 |
| ACTIN FILAMENT POLYMERIZATION                                           | 20  | -0.365435459 | 0.023122065 |
| SMOOTH MUSCLE CONTRACTION                                               | 36  | 0.183634121  | 0.185841912 |
| MACROPHAGE CHEMOTAXIS                                                   | 12  | 0.023416217  | 0.921405355 |
| NEUTRAL LIPID METABOLIC PROCESS                                         | 66  | 0.112803956  | 0.271602963 |
| POSITIVE REGULATION OF INTERLEUKIN 4 PRODUCTION                         | 16  | 0.315135481  | 0.141401509 |
| DEFENSE RESPONSE TO GRAM POSITIVE BACTERIUM                             | 46  | -0.224887092 | 0.046581172 |
| RESPONSE TO LIPOPROTEIN PARTICLE                                        | 19  | -0.319544786 | 0.064427682 |
| AMINO ACID BETAINE METABOLIC PROCESS                                    | 17  | 0.159252271  | 0.429868974 |
| ALPHA BETA T CELL ACTIVATION                                            | 45  | -0.03946305  | 0.744382426 |
| RIBONUCLEOPROTEIN COMPLEX DISASSEMBLY                                   | 11  | -0.244606947 | 0.278891227 |
| CELL SUBSTRATE ADHERENS JUNCTION ASSEMBLY                               | 22  | -0.154771431 | 0.355537643 |
| ENTEROENDOCRINE CELL DIFFERENTIATION                                    | 16  | 0.224582729  | 0.283432653 |
| REGULATION OF JNK CASCADE                                               | 142 | 0.022063047  | 0.750139222 |
| CELLULAR ALDEHYDE METABOLIC PROCESS                                     | 77  | 0.00520308   | 0.955653074 |
| RHYTHMIC BEHAVIOR                                                       | 13  | 0.19906184   | 0.389433941 |
| DEVELOPMENTAL PIGMENTATION                                              | 34  | 0.136679864  | 0.339484636 |
| ARGININE METABOLIC PROCESS                                              | 15  | -0.175412513 | 0.37902636  |
| ACIDIC AMINO ACID TRANSPORT                                             | 21  | 0.03606245   | 0.841148701 |
| NON RECOMBINATIONAL REPAIR                                              | 68  | 0.060094651  | 0.550174769 |
| CARBOHYDRATE METABOLIC PROCESS                                          | 552 | -0.03360389  | 0.340046911 |
| REGULATION OF ACTIN FILAMENT BUNDLE ASSEMBLY                            | 70  | -0.09094302  | 0.341615968 |
| OLFACTORY LOBE DEVELOPMENT                                              | 30  | 0.148973169  | 0.331914015 |
| RESPONSE TO INTERLEUKIN 6                                               | 23  | 0.151644216  | 0.387740565 |
| VASCULOGENESIS                                                          | 58  | 0.025259435  | 0.815374653 |
| LIPOPOLYSACCHARIDE MEDIATED SIGNALING PATHWAY                           | 28  | -0.015228876 | 0.921334373 |
| REGULATION OF CELL CELL ADHESION                                        | 329 | -0.016878258 | 0.710279106 |
| BRANCHING INVOLVED IN LABYRINTHINE LAYER MORPHOGENESIS                  | 11  | 0.38870585   | 0.109678323 |
| REGULATION OF SMOOTH MUSCLE CELL PROLIFERATION                          | 88  | -0.039795554 | 0.646057254 |
| IMMUNE RESPONSE                                                         | 805 | 0.029994144  | 0.314155396 |
| REGULATION OF T CELL MEDIATED IMMUNITY                                  | 43  | -0.108142282 | 0.372578108 |
| POSITIVE REGULATION OF CAMP METABOLIC PROCESS                           | 64  | 0.084546111  | 0.415823875 |
| MECHANORECEPTOR DIFFERENTIATION                                         | 40  | -0.064831724 | 0.610920516 |
| HISTONE UBIQUITINATION                                                  | 33  | -0.112932505 | 0.415059165 |
| CELLULAR RESPONSE TO ANTIBIOTIC                                         | 14  | -0.075893625 | 0.723331668 |
| NEGATIVE REGULATION OF LYASE ACTIVITY                                   | 19  | -0.169597362 | 0.340537968 |
| NEURON APOPTOTIC PROCESS                                                | 33  | -0.24263994  | 0.068123494 |
| REGULATION OF VASOCONSTRICTION                                          | 57  | 0.096725844  | 0.379732655 |
| CELLULAR RESPONSE TO FATTY ACID                                         | 46  | 0.198929534  | 0.104332853 |
| MONOVALENT INORGANIC ANION HOMEOSTASIS                                  | 15  | -0.157836314 | 0.436127093 |
| REGULATION OF PH                                                        | 70  | 0.105863582  | 0.287785002 |
| CYCLOOXYGENASE PATHWAY                                                  | 9   | -0.299478068 | 0.218191557 |
| OXIDOREDUCTION COENZYME METABOLIC PROCESS                               | 94  | -0.027945761 | 0.739685972 |
| CELL SURFACE RECEPTOR SIGNALING PATHWAY INVOLVED IN CELL CELL SIGNALING | 51  | 0.040182827  | 0.728185673 |
| POSITIVE REGULATION OF RESPONSE TO CYTOKINE STIMULUS                    | 31  | -0.241175423 | 0.073935294 |
| PROTEOGLYCAN BIOSYNTHETIC PROCESS                                       | 52  | -0.066207705 | 0.553697834 |
| GRANULOCYTE DIFFERENTIATION                                             | 13  | 0.153390018  | 0.507161537 |
| GOLGI RIBBON FORMATION                                                  | 11  | -0.322564025 | 0.138542145 |
| NEGATIVE REGULATION OF ENDOPLASMIC RETICULUM UNFOLDED PROTEIN RESPONSE  | 11  | 0.073444087  | 0.768935881 |
| DEOXYRIBONUCLEOTIDE BIOSYNTHETIC PROCESS                                | 12  | -0.038075354 | 0.870809778 |
| PROTEIN LOCALIZATION TO GOLGI APPARATUS                                 | 26  | 0.071148328  | 0.661858836 |
| DE NOVO POSTTRANSLATIONAL PROTEIN FOLDING                               | 14  | 0.11843014   | 0.595504289 |
| POSITIVE REGULATION OF PROTEIN COMPLEX ASSEMBLY                         | 174 | 0.041135005  | 0.513020989 |

|                                                                                                     |      |              |             |
|-----------------------------------------------------------------------------------------------------|------|--------------|-------------|
| PERK MEDIATED UNFOLDED PROTEIN RESPONSE                                                             | 12   | -0.378444137 | 0.056577476 |
| RESPONSE TO CORTICOSTERONE                                                                          | 24   | -0.138858579 | 0.388086118 |
| REGULATION OF VIRAL TRANSCRIPTION                                                                   | 61   | 0.042859333  | 0.685416497 |
| NEGATIVE REGULATION OF PROTEIN COMPLEX DISASSEMBLY                                                  | 154  | -0.00976766  | 0.88255414  |
| POSITIVE REGULATION OF CYSTEINE TYPE ENDOPEPTIDASE ACTIVITY INVOLVED IN APOPTOTIC SIGNALING PATHWAY | 17   | -0.207418844 | 0.262242313 |
| TUBE FORMATION                                                                                      | 121  | -0.117676068 | 0.104527089 |
| CELLULAR RESPONSE TO STEROID HORMONE STIMULUS                                                       | 193  | 0.100905576  | 0.09435797  |
| RIBONUCLEOPROTEIN COMPLEX BIOGENESIS                                                                | 423  | -0.138785336 | 0.000379492 |
| MEIOTIC CELL CYCLE                                                                                  | 155  | 0.026884653  | 0.685577769 |
| POSITIVE REGULATION OF RENAL SODIUM EXCRETION                                                       | 9    | 0.428287081  | 0.090020954 |
| RESPONSE TO STIMULUS INVOLVED IN REGULATION OF MUSCLE ADAPTATION                                    | 13   | 0.365095138  | 0.100973332 |
| CELL FATE DETERMINATION                                                                             | 29   | 0.398505407  | 0.009260075 |
| DETECTION OF MECHANICAL STIMULUS INVOLVED IN SENSORY PERCEPTION OF SOUND                            | 10   | -0.067427129 | 0.790984344 |
| REGULATION OF OSTEOBLAST DIFFERENTIATION                                                            | 106  | 0.013507152  | 0.865853399 |
| POSITIVE REGULATION OF TELOMERE MAINTENANCE                                                         | 43   | -0.052765113 | 0.668954697 |
| POSITIVE REGULATION OF EPIDERMAL GROWTH FACTOR ACTIVATED RECEPTOR ACTIVITY                          | 10   | 0.115038724  | 0.665909433 |
| MRNA TRANSCRIPTION                                                                                  | 19   | 0.051612366  | 0.785670971 |
| COENZYME METABOLIC PROCESS                                                                          | 231  | -0.019100673 | 0.723614074 |
| CELLULAR LIPID METABOLIC PROCESS                                                                    | 753  | 0.026573219  | 0.387268877 |
| GDP METABOLIC PROCESS                                                                               | 13   | 0.247927265  | 0.281837479 |
| REGULATION OF PROTEIN HOMOOIGOMERIZATION                                                            | 16   | 0.224148857  | 0.279430243 |
| REGULATION OF FATTY ACID BIOSYNTHETIC PROCESS                                                       | 31   | 0.036923612  | 0.803175557 |
| POTASSIUM ION IMPORT                                                                                | 21   | 0.257985719  | 0.159037658 |
| POSTTRANSCRIPTIONAL GENE SILENCING                                                                  | 42   | -0.161645873 | 0.184092103 |
| CELLULAR RESPONSE TO DSRNA                                                                          | 37   | -0.208528574 | 0.097786089 |
| INTERSPECIES INTERACTION BETWEEN ORGANISMS                                                          | 630  | -0.076933639 | 0.018880118 |
| POSITIVE REGULATION OF INTERFERON GAMMA BIOSYNTHETIC PROCESS                                        | 9    | 0.402223912  | 0.114162644 |
| LAMELLIPODIUM ORGANIZATION                                                                          | 36   | -0.28792581  | 0.020319511 |
| ADENYLATE CYCLASE MODULATING G PROTEIN COUPLED RECEPTOR SIGNALING PATHWAY                           | 98   | 0.124032687  | 0.141483962 |
| PROTEIN TARGETING TO PLASMA MEMBRANE                                                                | 23   | -0.135062531 | 0.413918284 |
| REGULATION OF DNA DAMAGE CHECKPOINT                                                                 | 13   | 0.583121901  | 0.007927429 |
| NEGATIVE REGULATION OF LYMPHOCYTE MEDIATED IMMUNITY                                                 | 30   | -0.073088121 | 0.618530509 |
| NEGATIVE REGULATION OF LIPID TRANSPORT                                                              | 22   | -0.000197653 | 0.999096376 |
| REGULATION OF HEART RATE BY CARDIAC CONDUCTION                                                      | 26   | -0.190010507 | 0.211130561 |
| KETONE BIOSYNTHETIC PROCESS                                                                         | 20   | 0.028836668  | 0.875512491 |
| I KAPPAB PHOSPHORYLATION                                                                            | 11   | 0.082823965  | 0.740614461 |
| POSITIVE REGULATION OF MRNA 3 END PROCESSING                                                        | 17   | -0.119378889 | 0.535376929 |
| GROOMING BEHAVIOR                                                                                   | 10   | 0.372148411  | 0.133566973 |
| REGULATION OF HISTONE H3 K4 METHYLATION                                                             | 24   | -0.209730404 | 0.178695935 |
| GLUCOSE METABOLIC PROCESS                                                                           | 104  | -0.013145478 | 0.869897739 |
| POSITIVE REGULATION OF BLOOD PRESSURE                                                               | 31   | 0.206528767  | 0.165413182 |
| REGULATION OF ANOIKIS                                                                               | 23   | 0.110805328  | 0.52370716  |
| POSITIVE REGULATION OF CARDIAC MUSCLE CELL PROLIFERATION                                            | 17   | 0.326752518  | 0.095870659 |
| NEGATIVE REGULATION OF VIRAL ENTRY INTO HOST CELL                                                   | 16   | 0.206452315  | 0.322516488 |
| NEGATIVE REGULATION OF B CELL PROLIFERATION                                                         | 14   | -0.249425091 | 0.231549039 |
| PURINE NUCLEOBASE METABOLIC PROCESS                                                                 | 19   | 0.04191642   | 0.824755195 |
| MITOCHONDRIAL CALCIUM ION TRANSPORT                                                                 | 11   | 0.007878552  | 0.974569239 |
| NUCLEOBASE CONTAINING SMALL MOLECULE INTERCONVERSION                                                | 20   | -0.403939471 | 0.013054486 |
| MITOCHONDRIAL FUSION                                                                                | 17   | 0.18766682   | 0.358303099 |
| REGULATION OF DEPHOSPHORYLATION                                                                     | 141  | 0.048006196  | 0.49199558  |
| CARBOHYDRATE HOMEOSTASIS                                                                            | 145  | -0.063323014 | 0.346167652 |
| NEURON PROJECTION REGENERATION                                                                      | 31   | -0.086438583 | 0.548486075 |
| CARTILAGE DEVELOPMENT INVOLVED IN ENDOCHONDRAL BONE MORPHOGENESIS                                   | 15   | -0.00042055  | 0.998411976 |
| NEGATIVE REGULATION OF EPIDERMAL CELL DIFFERENTIATION                                               | 12   | 0.259874847  | 0.279832875 |
| LONG TERM SYNAPTIC POTENTIATION                                                                     | 32   | -0.012658378 | 0.930122971 |
| MONOCARBOXYLIC ACID TRANSPORT                                                                       | 101  | 0.027330416  | 0.739267798 |
| REGULATION OF CYTOSKELETON ORGANIZATION                                                             | 453  | 0.026167688  | 0.504686144 |
| SEX DIFFERENTIATION                                                                                 | 210  | 0.055872164  | 0.330676223 |
| NEGATIVE REGULATION OF HORMONE SECRETION                                                            | 59   | 0.024733181  | 0.81759748  |
| CELL CYCLE                                                                                          | 1212 | -0.077103712 | 0.001416212 |
| CELLULAR RESPONSE TO PH                                                                             | 13   | 0.036001161  | 0.874817655 |

|                                                                                         |      |              |             |
|-----------------------------------------------------------------------------------------|------|--------------|-------------|
| DSRNA FRAGMENTATION                                                                     | 22   | -0.295500772 | 0.058437608 |
| NEGATIVE REGULATION OF CATECHOLAMINE SECRETION                                          | 12   | 0.200217064  | 0.402590739 |
| REGULATION OF INTRINSIC APOPTOTIC SIGNALING PATHWAY IN RESPONSE TO DNA DAMAGE           | 32   | 0.038776308  | 0.790377285 |
| RESPONSE TO VITAMIN E                                                                   | 14   | 0.209803188  | 0.351258921 |
| POSITIVE REGULATION OF PROTEIN KINASE B SIGNALING                                       | 74   | -0.164791306 | 0.069019522 |
| LYMPH VESSEL MORPHOGENESIS                                                              | 12   | 0.175246839  | 0.467608856 |
| POSITIVE REGULATION OF CALCIUM ION IMPORT                                               | 45   | -0.208096998 | 0.069558941 |
| NUCLEAR IMPORT                                                                          | 119  | -0.099810787 | 0.174441299 |
| DETECTION OF ABIOTIC STIMULUS                                                           | 78   | 0.129603368  | 0.170696912 |
| OLIGOSACCHARIDE BIOSYNTHETIC PROCESS                                                    | 11   | -0.440714227 | 0.041994213 |
| CARDIAC MUSCLE CELL ACTION POTENTIAL                                                    | 32   | -0.237286292 | 0.080171066 |
| NEGATIVE REGULATION OF CELL CYCLE G2 M PHASE TRANSITION                                 | 24   | -0.003329113 | 0.984094513 |
| PURINE NUCLEOSIDE CATABOLIC PROCESS                                                     | 13   | -0.080924926 | 0.715857557 |
| NEGATIVE REGULATION OF CYTOSKELETON ORGANIZATION                                        | 201  | -0.01313066  | 0.820660509 |
| RESPONSE TO MUSCLE ACTIVITY                                                             | 18   | 0.084211274  | 0.667158992 |
| NEGATIVE REGULATION OF JNK CASCADE                                                      | 31   | 0.096293509  | 0.51935646  |
| REGULATION OF MYOTUBE DIFFERENTIATION                                                   | 48   | 0.100991406  | 0.400358186 |
| REGULATION OF CATENIN IMPORT INTO NUCLEUS                                               | 22   | -0.16070137  | 0.335167388 |
| FUSION OF SPERM TO EGG PLASMA MEMBRANE                                                  | 5    | -0.027748943 | 0.93917026  |
| TRACHEA MORPHOGENESIS                                                                   | 11   | 0.288865316  | 0.252192576 |
| POSITIVE REGULATION OF RESPONSE TO BIOTIC STIMULUS                                      | 29   | -0.108768483 | 0.460620867 |
| ENDOTHELIAL CELL PROLIFERATION                                                          | 22   | -0.101789275 | 0.549396589 |
| LIPID PHOSPHORYLATION                                                                   | 88   | 0.210512822  | 0.018441464 |
| CELLULAR CARBOHYDRATE METABOLIC PROCESS                                                 | 127  | -0.086690413 | 0.224510026 |
| NUCLEOSIDE PHOSPHATE CATABOLIC PROCESS                                                  | 64   | 0.147654267  | 0.158387133 |
| CELLULAR RESPONSE TO STARVATION                                                         | 112  | -0.023607448 | 0.759680946 |
| VESICLE MEDIATED TRANSPORT BETWEEN ENDOSOMAL COMPARTMENTS                               | 20   | 0.257341754  | 0.168156031 |
| RESPONSE TO DRUG                                                                        | 384  | 0.008558125  | 0.839889086 |
| LIPID BIOSYNTHETIC PROCESS                                                              | 452  | -0.036877679 | 0.341272537 |
| AMMONIUM TRANSPORT                                                                      | 44   | -0.109848764 | 0.360433974 |
| PHOTORECEPTOR CELL DIFFERENTIATION                                                      | 39   | 0.037969823  | 0.773792279 |
| ORGANONITROGEN COMPOUND METABOLIC PROCESS                                               | 1559 | -0.098200488 | 5.02E-06    |
| MEGAKARYOCYTE DIFFERENTIATION                                                           | 18   | -0.363836791 | 0.02929239  |
| PROTEIN DEPOLYMERIZATION                                                                | 20   | -0.073916034 | 0.681052476 |
| CELLULAR RESPONSE TO CALCIUM ION                                                        | 42   | -0.101921746 | 0.407997474 |
| DNA METHYLATION OR DEMETHYLATION                                                        | 49   | 0.131957082  | 0.268279359 |
| NEGATIVE REGULATION OF EXTRINSIC APOPTOTIC SIGNALING PATHWAY VIA DEATH DOMAIN RECEPTORS | 31   | -0.293007396 | 0.027805613 |
| POSITIVE REGULATION OF CANONICAL WNT SIGNALING PATHWAY                                  | 107  | 0.028429683  | 0.721699722 |
| GLOMERULAR EPITHELIUM DEVELOPMENT                                                       | 16   | -0.357960266 | 0.043674424 |
| MITOTIC RECOMBINATION                                                                   | 41   | -0.188540806 | 0.119356629 |
| STRAND DISPLACEMENT                                                                     | 25   | -0.043069165 | 0.790418007 |
| PURINERGIC NUCLEOTIDE RECEPTOR SIGNALING PATHWAY                                        | 16   | 0.0030924    | 0.987949885 |
| REGULATION OF NEURON PROJECTION DEVELOPMENT                                             | 364  | 0.031027295  | 0.47739383  |
| MICROTUBULE ORGANIZING CENTER ORGANIZATION                                              | 78   | -0.179626022 | 0.041099497 |
| PIRNA METABOLIC PROCESS                                                                 | 11   | 0.249030329  | 0.313807799 |
| NEGATIVE REGULATION OF GLUCOSE TRANSPORT                                                | 17   | 0.003599499  | 0.985544495 |
| VACUOLE ORGANIZATION                                                                    | 153  | 0.052822967  | 0.431531022 |
| CARDIOCYTE DIFFERENTIATION                                                              | 85   | 0.102201009  | 0.258727902 |
| RESPONSE TO GROWTH FACTOR                                                               | 421  | -0.059143116 | 0.138296809 |
| POSITIVE REGULATION OF WOUND HEALING                                                    | 44   | 0.192865954  | 0.124868956 |
| REGULATION OF LEUKOCYTE MEDIATED IMMUNITY                                               | 133  | -0.057793235 | 0.41071675  |
| NEGATIVE REGULATION OF CELLULAR SENESCENCE                                              | 11   | 0.321314023  | 0.202439362 |
| POSITIVE REGULATION OF ACTIVATED T CELL PROLIFERATION                                   | 23   | -0.048231705 | 0.774936154 |
| RETROGRADE VESICLE MEDIATED TRANSPORT GOLGI TO ER                                       | 71   | -0.047021899 | 0.625238875 |
| NEGATIVE REGULATION OF CELL CYCLE PHASE TRANSITION                                      | 140  | -0.118385645 | 0.079226574 |
| DIENCEPHALON DEVELOPMENT                                                                | 61   | -0.040579204 | 0.696230024 |
| POSITIVE REGULATION OF MYOBLAST DIFFERENTIATION                                         | 19   | 0.026548156  | 0.888182116 |
| MITOCHONDRION ORGANIZATION                                                              | 549  | -0.08579365  | 0.013878615 |
| HAIR CELL DIFFERENTIATION                                                               | 27   | -0.126681324 | 0.404892968 |
| REGULATION OF STEM CELL PROLIFERATION                                                   | 76   | -0.045055948 | 0.628308628 |
| REGULATION OF CHROMATIN ORGANIZATION                                                    | 140  | -0.047661555 | 0.487790185 |
| MEMBRANE PROTEIN ECTODOMAIN PROTEOLYSIS                                                 | 20   | -0.527341462 | 0.001297156 |
| REGULATION OF MITOCHONDRIAL MEMBRANE POTENTIAL                                          | 48   | 0.009562182  | 0.935686272 |
| PERICARDIUM DEVELOPMENT                                                                 | 16   | 0.007217533  | 0.971904854 |

|                                                                                                     |     |              |             |
|-----------------------------------------------------------------------------------------------------|-----|--------------|-------------|
| CELL FATE COMMITMENT                                                                                | 179 | 0.171083549  | 0.006607857 |
| PEROXISOMAL TRANSPORT                                                                               | 17  | -0.075653091 | 0.697756517 |
| POSITIVE REGULATION OF ADHERENS JUNCTION ORGANIZATION                                               | 20  | -0.253919544 | 0.127382965 |
| POSITIVE REGULATION OF PEPTIDYL TYROSINE PHOSPHORYLATION                                            | 142 | 0.05066779   | 0.467001205 |
| REGULATION OF MYOBLAST FUSION                                                                       | 18  | -0.1035013   | 0.580883962 |
| NEGATIVE REGULATION OF HYDROLASE ACTIVITY                                                           | 327 | 0.053661974  | 0.245296848 |
| REGULATION OF NEUROTRANSMITTER UPTAKE                                                               | 12  | 0.135201115  | 0.573856237 |
| ACTIVIN RECEPTOR SIGNALING PATHWAY                                                                  | 19  | 0.212561514  | 0.268731887 |
| POSITIVE REGULATION OF PROTEIN ACETYLATION                                                          | 34  | 0.063526172  | 0.654673011 |
| NEGATIVE REGULATION OF CALCIUM ION TRANSPORT                                                        | 40  | 0.00760959   | 0.953222181 |
| MULTI ORGANISM REPRODUCTIVE PROCESS                                                                 | 678 | 0.068082107  | 0.036411911 |
| RENAL SYSTEM VASCULATURE DEVELOPMENT                                                                | 16  | -0.031591492 | 0.876373723 |
| REGULATION OF PLASMA LIPOPROTEIN PARTICLE LEVELS                                                    | 36  | 0.351737131  | 0.010214076 |
| DETECTION OF STIMULUS                                                                               | 216 | 0.140990622  | 0.013816761 |
| ESTABLISHMENT OF PROTEIN LOCALIZATION TO VACUOLE                                                    | 31  | -0.037056867 | 0.799498281 |
| FUCOSE METABOLIC PROCESS                                                                            | 12  | -0.168923647 | 0.450743363 |
| REGULATION OF AMINO ACID TRANSPORT                                                                  | 24  | 0.250259545  | 0.134821645 |
| APOPTOTIC DNA FRAGMENTATION                                                                         | 14  | -0.040055754 | 0.853330311 |
| HETEROPHILIC CELL CELL ADHESION VIA PLASMA MEMBRANE CELL ADHESION MOLECULES                         | 36  | -0.212562009 | 0.096137535 |
| NEGATIVE REGULATION OF LIPID STORAGE                                                                | 16  | 0.196996126  | 0.349175131 |
| REGULATION OF MICROVILLUS ORGANIZATION                                                              | 13  | -0.123418776 | 0.573498034 |
| SCF DEPENDENT PROTEASOMAL UBIQUITIN DEPENDENT PROTEIN CATABOLIC PROCESS                             | 23  | -0.024073083 | 0.887225554 |
| REGULATION OF LEUKOCYTE CHEMOTAXIS                                                                  | 87  | -0.101745036 | 0.235071423 |
| ENTERIC NERVOUS SYSTEM DEVELOPMENT                                                                  | 9   | 0.218259682  | 0.431926714 |
| MUSCLE CELL FATE COMMITMENT                                                                         | 12  | 0.355007698  | 0.124537932 |
| PERIPHERAL NERVOUS SYSTEM AXON ENSHEATHMENT                                                         | 21  | -0.007373916 | 0.967019353 |
| IRON ION IMPORT                                                                                     | 11  | -0.192277904 | 0.41121485  |
| REGULATION OF METANEPHROS DEVELOPMENT                                                               | 21  | -0.003994157 | 0.982145557 |
| NUCLEAR TRANSCRIBED MRNA POLY A TAIL SHORTENING                                                     | 24  | 0.064810203  | 0.701558084 |
| CELLULAR RESPONSE TO AMINO ACID STIMULUS                                                            | 52  | -0.10797495  | 0.328371641 |
| DNA GEOMETRIC CHANGE                                                                                | 76  | 0.078052744  | 0.413609946 |
| REGULATION OF GUANYLATE CYCLASE ACTIVITY                                                            | 7   | 0.20140911   | 0.517610715 |
| REGULATION OF MONOCYTE DIFFERENTIATION                                                              | 13  | -0.022104787 | 0.922027865 |
| NUCLEOTIDE EXCISION REPAIR DNA INCISION                                                             | 38  | 0.208163286  | 0.126451936 |
| CERAMIDE METABOLIC PROCESS                                                                          | 62  | -0.066137932 | 0.518382889 |
| REGULATION OF LAMELLIPODIUM ORGANIZATION                                                            | 36  | 0.185292958  | 0.185726918 |
| REGULATION OF B CELL PROLIFERATION                                                                  | 50  | -0.072275403 | 0.525512077 |
| REGULATION OF CELL COMMUNICATION BY ELECTRICAL COUPLING                                             | 12  | -0.223017996 | 0.309288523 |
| SPINAL CORD ASSOCIATION NEURON DIFFERENTIATION                                                      | 7   | -0.283549968 | 0.321790003 |
| CYTOKINE PRODUCTION INVOLVED IN IMMUNE RESPONSE                                                     | 15  | -0.198683331 | 0.312581966 |
| DEOXYRIBOSE PHOSPHATE CATABOLIC PROCESS                                                             | 20  | 0.06746082   | 0.715620471 |
| HEART VALVE DEVELOPMENT                                                                             | 30  | 0.24570515   | 0.107264713 |
| GLYCOSYL COMPOUND METABOLIC PROCESS                                                                 | 332 | -0.107420569 | 0.015076941 |
| REGULATION OF TUMOR NECROSIS FACTOR MEDIATED SIGNALING PATHWAY                                      | 45  | 0.010045612  | 0.934581808 |
| PEPTIDYL TYROSINE MODIFICATION                                                                      | 157 | 0.026723397  | 0.685480708 |
| LEUKOCYTE CELL CELL ADHESION                                                                        | 212 | -0.049050135 | 0.380683161 |
| NEGATIVE REGULATION OF LEUKOCYTE DEGRANULATION                                                      | 10  | -0.187445785 | 0.442175856 |
| NUCLEAR PORE COMPLEX ASSEMBLY                                                                       | 11  | -0.416735956 | 0.047268939 |
| PROTEIN LOCALIZATION TO ORGANELLE                                                                   | 514 | -0.088038976 | 0.01447523  |
| PHOSPHATIDYLETHANOLAMINE BIOSYNTHETIC PROCESS                                                       | 12  | -0.478963586 | 0.012498049 |
| ENDOCYTIC RECYCLING                                                                                 | 24  | 0.226081887  | 0.185567832 |
| CELLULAR RESPONSE TO RADIATION                                                                      | 121 | -0.178535128 | 0.011643033 |
| POSITIVE REGULATION OF TRANSCRIPTION REGULATORY REGION DNA BINDING                                  | 14  | 0.123302024  | 0.580499725 |
| REGULATION OF INTERLEUKIN 17 PRODUCTION                                                             | 18  | 0.029880337  | 0.877651066 |
| POSITIVE REGULATION OF DENDRITE MORPHOGENESIS                                                       | 29  | -0.245674673 | 0.084045603 |
| SUPEROXIDE ANION GENERATION                                                                         | 7   | 0.286271244  | 0.355765079 |
| CELLULAR RESPONSE TO KETONE                                                                         | 65  | 0.161145997  | 0.121588143 |
| POSITIVE REGULATION OF INTERLEUKIN 17 PRODUCTION                                                    | 11  | 0.050220544  | 0.840164522 |
| NEGATIVE REGULATION OF APOPTOTIC SIGNALING PATHWAY                                                  | 186 | -0.113639126 | 0.052518088 |
| MULTICELLULAR ORGANISMAL HOMEOSTASIS                                                                | 215 | 0.06635014   | 0.24335176  |
| NEGATIVE REGULATION OF CELL CYCLE G1 S PHASE TRANSITION                                             | 93  | -0.15017329  | 0.06720721  |
| REGULATION OF MITOCHONDRIAL OUTER MEMBRANE PERMEABILIZATION INVOLVED IN APOPTOTIC SIGNALING PATHWAY | 42  | -0.105176064 | 0.392043071 |

|                                                                            |     |              |             |
|----------------------------------------------------------------------------|-----|--------------|-------------|
| REGULATION OF SIGNAL TRANSDUCTION BY P53 CLASS MEDIATOR                    | 157 | -0.029788435 | 0.647720635 |
| URONIC ACID METABOLIC PROCESS                                              | 13  | 0.272101247  | 0.229954829 |
| REGULATION OF DELAYED RECTIFIER POTASSIUM CHANNEL ACTIVITY                 | 15  | -0.307616236 | 0.101456706 |
| POSITIVE REGULATION OF CYTOKINE PRODUCTION                                 | 311 | 0.014313904  | 0.760746123 |
| RESPONSE TO YEAST                                                          | 8   | -0.274155038 | 0.293251639 |
| GAMETE GENERATION                                                          | 444 | 0.109527156  | 0.006333254 |
| KIDNEY MESENCHYME DEVELOPMENT                                              | 17  | 0.107196066  | 0.595475507 |
| REPLICATIVE SENESCENCE                                                     | 12  | -0.060906792 | 0.793552074 |
| REGULATION OF CELLULAR AMIDE METABOLIC PROCESS                             | 329 | -0.009992044 | 0.82619085  |
| DENDRITIC SPINE ORGANIZATION                                               | 12  | -0.269002516 | 0.218420639 |
| COCHLEA DEVELOPMENT                                                        | 34  | -0.128177592 | 0.34421162  |
| HISTONE H2A ACETYLATION                                                    | 14  | -0.174991727 | 0.401061132 |
| DNA REPLICATION DEPENDENT NUCLEOSOME ORGANIZATION                          | 31  | 0.051756649  | 0.727410362 |
| CELLULAR COMPONENT MORPHOGENESIS                                           | 783 | 0.044744065  | 0.1393956   |
| CELL AGING                                                                 | 61  | -0.173236848 | 0.083047135 |
| NEGATIVE REGULATION OF MEGAKARYOCYTE DIFFERENTIATION                       | 17  | 0.276550204  | 0.160783545 |
| ACTIVATION OF MAPKKK ACTIVITY                                              | 11  | -0.009060045 | 0.970649223 |
| RRNA 3 END PROCESSING                                                      | 13  | -0.20318405  | 0.33629362  |
| GLUTATHIONE METABOLIC PROCESS                                              | 43  | -0.011277589 | 0.927889068 |
| POSITIVE REGULATION OF PROTEIN MODIFICATION PROCESS                        | 977 | -0.022163272 | 0.410780873 |
| POSITIVE REGULATION OF MICROTUBULE POLYMERIZATION                          | 17  | 0.194952152  | 0.33899854  |
| PYRIMIDINE CONTAINING COMPOUND TRANSMEMBRANE TRANSPORT                     | 12  | -0.31781668  | 0.140003293 |
| BRANCHED CHAIN AMINO ACID METABOLIC PROCESS                                | 22  | -0.225652729 | 0.160858295 |
| ENERGY HOMEOSTASIS                                                         | 13  | 0.171610055  | 0.45839745  |
| NEGATIVE REGULATION OF T CELL MEDIATED IMMUNITY                            | 12  | 0.017734725  | 0.940378556 |
| DEPHOSPHORYLATION                                                          | 261 | -0.081995228 | 0.10171782  |
| REGULATION OF CELL PROLIFERATION INVOLVED IN HEART MORPHOGENESIS           | 15  | 0.002213394  | 0.991646977 |
| MATERNAL PROCESS INVOLVED IN FEMALE PREGNANCY                              | 51  | -0.148125834 | 0.179429152 |
| UBIQUINONE METABOLIC PROCESS                                               | 11  | 0.096919072  | 0.69848298  |
| POSITIVE REGULATION OF CELL CELL ADHESION                                  | 207 | -0.066742009 | 0.236303711 |
| EARLY ENDOSOME TO GOLGI TRANSPORT                                          | 12  | 0.079949696  | 0.738365248 |
| POSITIVE REGULATION OF CATION TRANSMEMBRANE TRANSPORT                      | 78  | -0.259540368 | 0.00255169  |
| MORPHOGENESIS OF A BRANCHING STRUCTURE                                     | 149 | -0.010740947 | 0.872996685 |
| INTRACELLULAR RECEPTOR SIGNALING PATHWAY                                   | 151 | 0.037711006  | 0.575911943 |
| BEHAVIORAL RESPONSE TO COCAINE                                             | 8   | 0.375337271  | 0.180626802 |
| HISTONE MRNA METABOLIC PROCESS                                             | 28  | 0.006656524  | 0.965735537 |
| REGULATION OF ESTABLISHMENT OF PROTEIN LOCALIZATION TO PLASMA MEMBRANE     | 46  | 0.160072497  | 0.194378174 |
| PYRIMIDINE DEOXYRIBONUCLEOTIDE METABOLIC PROCESS                           | 16  | 0.065862281  | 0.750220821 |
| RESPONSE TO PARATHYROID HORMONE                                            | 13  | 0.340462906  | 0.11950562  |
| HINDBRAIN MORPHOGENESIS                                                    | 33  | -0.111312885 | 0.421342268 |
| POSITIVE REGULATION OF PRODUCTION OF MOLECULAR MEDIATOR OF IMMUNE RESPONSE | 53  | 0.005559616  | 0.960654119 |
| HIGH DENSITY LIPOPROTEIN PARTICLE REMODELING                               | 12  | 0.455997133  | 0.034545526 |
| POSITIVE REGULATION OF PROTEIN DEPOLYMERIZATION                            | 18  | 0.037054023  | 0.84877771  |
| MUSCLE HYPERTROPHY                                                         | 21  | 0.007364942  | 0.967164489 |
| HUMORAL IMMUNE RESPONSE MEDIATED BY CIRCULATING IMMUNOGLOBULIN             | 28  | 0.201596604  | 0.200375031 |
| NEGATIVE REGULATION OF PROTEIN LOCALIZATION TO CELL PERIPHERY              | 19  | -0.030134422 | 0.871614068 |
| REGULATION OF PHOSPHOLIPID BIOSYNTHETIC PROCESS                            | 12  | 0.12084941   | 0.61568444  |
| MULTICELLULAR ORGANISMAL SIGNALING                                         | 96  | 0.119130755  | 0.162563467 |
| NEGATIVE REGULATION OF DEVELOPMENTAL PROCESS                               | 691 | 0.032346415  | 0.312873996 |
| REGULATION OF HOMOTYPIC CELL CELL ADHESION                                 | 263 | -0.02369625  | 0.639732107 |
| ORGANIC HYDROXY COMPOUND BIOSYNTHETIC PROCESS                              | 142 | -0.028995534 | 0.672159105 |
| CDP DIACYLGLYCEROL METABOLIC PROCESS                                       | 14  | -0.0804138   | 0.707792005 |
| FUCOSYLATION                                                               | 17  | -0.100219856 | 0.603765542 |
| REGULATION OF TYPE I INTERFERON MEDIATED SIGNALING PATHWAY                 | 30  | -0.17213927  | 0.228140882 |
| RHYTHMIC PROCESS                                                           | 258 | 0.00636079   | 0.901582562 |
| NEUROMUSCULAR PROCESS CONTROLLING POSTURE                                  | 13  | 0.188205424  | 0.416851964 |
| MYOTUBE DIFFERENTIATION                                                    | 47  | 0.009137357  | 0.93917219  |
| STEROID HORMONE MEDIATED SIGNALING PATHWAY                                 | 112 | 0.135438964  | 0.087716007 |
| REGULATION OF RESPONSE TO BIOTIC STIMULUS                                  | 203 | -0.125684301 | 0.024589594 |
| POSITIVE REGULATION OF CELL SIZE                                           | 13  | -0.012477802 | 0.956036962 |
| DETECTION OF LIGHT STIMULUS INVOLVED IN SENSORY PERCEPTION                 | 11  | 0.234905838  | 0.343563242 |
| PROTEIN LOCALIZATION TO CELL SURFACE                                       | 18  | -0.151722297 | 0.411079045 |
| REGULATION OF INTERLEUKIN 8 SECRETION                                      | 14  | -0.107668713 | 0.611543578 |

|                                                                           |     |              |             |
|---------------------------------------------------------------------------|-----|--------------|-------------|
| REGULATION OF SUPEROXIDE METABOLIC PROCESS                                | 21  | -0.031183312 | 0.860393542 |
| PEPTIDYL PROLINE MODIFICATION                                             | 49  | 0.008003158  | 0.945581345 |
| POSITIVE REGULATION OF NEURON MIGRATION                                   | 11  | 0.406765226  | 0.092805703 |
| REGULATION OF LONG TERM NEURONAL SYNAPTIC PLASTICITY                      | 21  | 0.205331959  | 0.259255487 |
| PHOSPHOLIPID TRANSPORT                                                    | 47  | 0.462784554  | 7.74E-05    |
| ACROSOME REACTION                                                         | 10  | 0.121592215  | 0.642959042 |
| SOMATIC STEM CELL DIVISION                                                | 21  | 0.233629296  | 0.195566631 |
| HISTONE MRNA CATABOLIC PROCESS                                            | 14  | 0.201289348  | 0.370848599 |
| ACETYL COA BIOSYNTHETIC PROCESS                                           | 11  | -0.427261744 | 0.035150224 |
| RESPONSE TO ARSENIC CONTAINING SUBSTANCE                                  | 29  | -0.310963218 | 0.024225953 |
| REGULATION OF DNA BIOSYNTHETIC PROCESS                                    | 90  | -0.058829972 | 0.490310962 |
| FIBROBLAST GROWTH FACTOR RECEPTOR SIGNALING PATHWAY                       | 78  | -0.043919978 | 0.632821817 |
| CARDIOLIPIN METABOLIC PROCESS                                             | 12  | -0.060760669 | 0.793885353 |
| REGULATION OF CELL CYCLE ARREST                                           | 101 | -0.082820696 | 0.300694062 |
| REGULATION OF MRNA SPLICING VIA SPLICEOSOME                               | 58  | 0.003925014  | 0.970931092 |
| REGULATION OF ANATOMICAL STRUCTURE MORPHOGENESIS                          | 919 | 0.006458294  | 0.816805441 |
| FEMALE GAMETE GENERATION                                                  | 76  | 0.044363893  | 0.640004015 |
| PLASMA MEMBRANE FUSION                                                    | 18  | -0.025963767 | 0.892315076 |
| EXTRACELLULAR MATRIX DISASSEMBLY                                          | 55  | -0.045342697 | 0.678320521 |
| PROTEIN HOMOOLOGOMERIZATION                                               | 210 | -0.020443949 | 0.7179043   |
| REGULATION OF OXIDATIVE STRESS INDUCED CELL DEATH                         | 41  | 0.096142335  | 0.459858666 |
| TRANSCRIPTION FROM RNA POLYMERASE I PROMOTER                              | 34  | 0.139176377  | 0.329887567 |
| REGULATION OF PEPTIDYL THREONINE PHOSPHORYLATION                          | 35  | -0.040877048 | 0.765566601 |
| NONMOTILE PRIMARY CILIUM ASSEMBLY                                         | 21  | 0.030455366  | 0.865432996 |
| HEART TRABECULA FORMATION                                                 | 13  | 0.158140106  | 0.498156029 |
| BODY FLUID SECRETION                                                      | 64  | -0.095228731 | 0.341877604 |
| TOR SIGNALING                                                             | 16  | 0.037899762  | 0.854143432 |
| MEMBRANE HYPERPOLARIZATION                                                | 10  | 0.25814428   | 0.317253821 |
| CELLULAR WATER HOMEOSTASIS                                                | 7   | 0.131124128  | 0.675914278 |
| POSITIVE REGULATION OF CHROMOSOME ORGANIZATION                            | 140 | -0.070923423 | 0.298964351 |
| ADENYLATE CYCLASE INHIBITING G PROTEIN COUPLED RECEPTOR SIGNALING PATHWAY | 46  | 0.16792393   | 0.171251033 |
| RESPONSE TO VITAMIN                                                       | 89  | 0.14906317   | 0.092431699 |
| REGULATION OF ATPASE ACTIVITY                                             | 57  | -0.064722995 | 0.544757516 |
| NEGATIVE REGULATION OF STRESS ACTIVATED PROTEIN KINASE SIGNALING CASCADE  | 39  | -0.088642717 | 0.489534655 |
| STRIATED MUSCLE CELL PROLIFERATION                                        | 15  | 0.068851848  | 0.747713494 |
| MUSCLE FIBER DEVELOPMENT                                                  | 41  | 0.105533138  | 0.416599813 |
| THALAMUS DEVELOPMENT                                                      | 13  | 0.129740426  | 0.573691982 |
| STEROL CATABOLIC PROCESS                                                  | 9   | -0.03040799  | 0.910595128 |
| POSITIVE REGULATION OF CYTOKINE BIOSYNTHETIC PROCESS                      | 49  | 0.127747153  | 0.284916823 |
| NEGATIVE REGULATION OF CHEMOKINE PRODUCTION                               | 14  | 0.011530501  | 0.958059017 |
| DETERMINATION OF ADULT LIFESPAN                                           | 13  | -0.364667081 | 0.071563738 |
| REGULATION OF PROTEIN KINASE C SIGNALING                                  | 12  | 0.145694069  | 0.543226629 |
| REGULATION OF CYSTEINE TYPE ENDOPEPTIDASE ACTIVITY                        | 195 | -0.100244198 | 0.081375992 |
| REGULATION OF CELLULAR RESPONSE TO STRESS                                 | 647 | -0.025255444 | 0.439955059 |
| POSITIVE REGULATION OF EPITHELIAL CELL MIGRATION                          | 95  | 0.080955723  | 0.343102922 |
| MISMATCH REPAIR                                                           | 26  | -0.002959763 | 0.985283845 |
| MACROPHAGE DIFFERENTIATION                                                | 17  | 0.241488822  | 0.238529043 |
| PHARYNGEAL SYSTEM DEVELOPMENT                                             | 16  | 0.141407789  | 0.497396202 |
| REGULATION OF ESTABLISHMENT OR MAINTENANCE OF CELL POLARITY               | 22  | 0.155513649  | 0.380403821 |
| MYELIN ASSEMBLY                                                           | 17  | -0.061288911 | 0.754018024 |
| HOMOTYPIC CELL CELL ADHESION                                              | 47  | -0.066488111 | 0.571645371 |
| NEGATIVE REGULATION OF EPITHELIAL CELL DIFFERENTIATION                    | 33  | 0.110130212  | 0.447767997 |
| ERROR PRONE TRANSLATION SYNTHESIS                                         | 19  | 0.239919658  | 0.216147221 |
| MAST CELL MEDIATED IMMUNITY                                               | 16  | -0.263463972 | 0.162390181 |
| POSITIVE REGULATION OF PROTEIN DEACETYLATION                              | 18  | -0.286525147 | 0.097916968 |
| NEGATIVE REGULATION OF MITOTIC NUCLEAR DIVISION                           | 33  | -0.280985434 | 0.028868055 |
| HOMEOSTASIS OF NUMBER OF CELLS WITHIN A TISSUE                            | 28  | 0.128880971  | 0.414716819 |
| POSITIVE REGULATION OF IMMUNE EFFECTOR PROCESS                            | 130 | -0.097043468 | 0.167159497 |
| UROGENITAL SYSTEM DEVELOPMENT                                             | 262 | 0.057359044  | 0.265598897 |
| NEGATIVE REGULATION OF CELL ACTIVATION                                    | 134 | -0.09557372  | 0.167724855 |
| CELLULAR RESPONSE TO ALCOHOL                                              | 106 | 0.067307564  | 0.404433139 |
| NEGATIVE REGULATION OF MONOOXYGENASE ACTIVITY                             | 10  | 0.423325823  | 0.083491816 |
| PEPTIDYL TYROSINE AUTOPHOSPHORYLATION                                     | 32  | -0.268263414 | 0.04646097  |
| CELL JUNCTION ASSEMBLY                                                    | 117 | -0.170581673 | 0.018625101 |

|                                                                 |      |              |             |
|-----------------------------------------------------------------|------|--------------|-------------|
| LATERAL VENTRICLE DEVELOPMENT                                   | 10   | 0.209795043  | 0.421937313 |
| MACROMOLECULE CATABOLIC PROCESS                                 | 831  | -0.063258776 | 0.028192313 |
| INTERACTION WITH SYMBIONT                                       | 50   | 0.107173139  | 0.362954543 |
| REGULATION OF POLYSACCHARIDE METABOLIC PROCESS                  | 37   | -0.035133402 | 0.792509713 |
| SMOOTHENED SIGNALING PATHWAY                                    | 61   | 0.08160457   | 0.442816198 |
| CELL MIGRATION IN HINDBRAIN                                     | 13   | -0.143787342 | 0.510258239 |
| EYE DEVELOPMENT                                                 | 274  | 0.002411149  | 0.961460347 |
| TRIPARTITE REGIONAL SUBDIVISION                                 | 10   | -0.166131163 | 0.498458807 |
| ORGANIC CATION TRANSPORT                                        | 15   | 0.21611346   | 0.312882206 |
| SLEEP                                                           | 11   | -0.102258924 | 0.670000153 |
| DEVELOPMENTAL PROCESS INVOLVED IN REPRODUCTION                  | 489  | 0.107792676  | 0.004876051 |
| URATE METABOLIC PROCESS                                         | 9    | -0.317332965 | 0.189411942 |
| PROTEIN DEPHOSPHORYLATION                                       | 180  | -0.098583988 | 0.099807567 |
| REGULATION OF CELLULAR PROTEIN CATABOLIC PROCESS                | 260  | -0.090580671 | 0.070558917 |
| REGULATION OF PROTEIN AUTOPHOSPHORYLATION                       | 33   | 0.17364697   | 0.232552269 |
| REGULATION OF NEURON DEATH                                      | 228  | -0.007578341 | 0.889410088 |
| TETRAHYDROFOLATE INTERCONVERSION                                | 9    | -0.173193949 | 0.501149416 |
| RESPONSE TO GAMMA RADIATION                                     | 48   | 0.020621503  | 0.862152768 |
| REGULATION OF CYCLIN DEPENDENT PROTEIN KINASE ACTIVITY          | 88   | -0.23903406  | 0.003347655 |
| REGULATION OF CELL DEATH                                        | 1291 | -0.025848339 | 0.275350143 |
| REGULATION OF RHODOPSIN MEDIATED SIGNALING PATHWAY              | 19   | -0.153410508 | 0.389800827 |
| NEGATIVE REGULATION OF STRESS FIBER ASSEMBLY                    | 14   | -0.223393653 | 0.268319837 |
| NEGATIVE REGULATION OF NF KAPPAB IMPORT INTO NUCLEUS            | 16   | -0.004415093 | 0.98276847  |
| POSITIVE REGULATION OF PROTEIN IMPORT                           | 92   | 0.033576136  | 0.696606043 |
| MULTI ORGANISM METABOLIC PROCESS                                | 137  | -0.22424816  | 0.000678546 |
| REGULATION OF KERATINOCYTE DIFFERENTIATION                      | 24   | 0.232931797  | 0.171505796 |
| MONOVALENT INORGANIC CATION HOMEOSTASIS                         | 98   | 0.128708356  | 0.127386929 |
| REGULATION OF BMP SIGNALING PATHWAY                             | 67   | 0.051484276  | 0.610757441 |
| HEART PROCESS                                                   | 73   | -0.083446423 | 0.374413252 |
| MUSCLE SYSTEM PROCESS                                           | 222  | -0.001431177 | 0.979350558 |
| MESENCHYME DEVELOPMENT                                          | 167  | 0.162040972  | 0.012561415 |
| TRANSCRIPTION FROM RNA POLYMERASE III PROMOTER                  | 40   | -0.011235971 | 0.930695558 |
| GLIAL CELL FATE COMMITMENT                                      | 7    | 0.067821897  | 0.828647616 |
| POSITIVE REGULATION OF PROTEOLYSIS                              | 330  | -0.080287406 | 0.072429372 |
| REGULATION OF CILUM ASSEMBLY                                    | 46   | 0.053626604  | 0.660298964 |
| ACTIVATION OF PROTEIN KINASE B ACTIVITY                         | 20   | -0.090748323 | 0.611477363 |
| REGULATION OF TRANSLATIONAL INITIATION IN RESPONSE TO STRESS    | 13   | -0.131365638 | 0.547819132 |
| ANTERIOR POSTERIOR AXIS SPECIFICATION                           | 41   | -0.263321486 | 0.024913775 |
| REGULATION OF LONG TERM SYNAPTIC POTENTIATION                   | 16   | -0.131657685 | 0.503309579 |
| REGULATION OF PROTEIN KINASE B SIGNALING                        | 111  | -0.114269044 | 0.130264129 |
| HOMOLOGOUS CHROMOSOME SEGREGATION                               | 37   | 0.296417195  | 0.028678468 |
| MUSCLE CELL CELLULAR HOMEOSTASIS                                | 15   | -0.370787176 | 0.045150335 |
| T CELL LINEAGE COMMITMENT                                       | 10   | 0.364339745  | 0.179694826 |
| NUCLEOSIDE BISPHOSPHATE BIOSYNTHETIC PROCESS                    | 15   | 0.036282489  | 0.864617525 |
| RESPONSE TO LITHIUM ION                                         | 22   | -0.035290706 | 0.838419996 |
| PROTEIN FOLDING IN ENDOPLASMIC RETICULUM                        | 10   | -0.695691738 | 0.000105208 |
| REGULATION OF FATTY ACID OXIDATION                              | 27   | 0.236359567  | 0.136928534 |
| MORPHOGENESIS OF A POLARIZED EPITHELIUM                         | 26   | 0.021163806  | 0.895606041 |
| REGULATION OF DNA TEMPLATED TRANSCRIPTION IN RESPONSE TO STRESS | 63   | 0.077682843  | 0.458439999 |
| ENDODERM FORMATION                                              | 47   | -0.289693944 | 0.008708822 |
| POSITIVE REGULATION OF SPROUTING ANGIOGENESIS                   | 14   | 0.229133832  | 0.302627721 |
| REGULATION OF DEVELOPMENT HETEROCHRONIC                         | 10   | 0.240198892  | 0.360896634 |
| ESTABLISHMENT OF ENDOTHELIAL BARRIER                            | 29   | -0.23343962  | 0.101521335 |
| REGULATION OF HUMORAL IMMUNE RESPONSE                           | 38   | 0.14371665   | 0.28711196  |
| REGULATION OF MAP KINASE ACTIVITY                               | 289  | -0.054317499 | 0.257737301 |
| NEGATIVE REGULATION OF INTERLEUKIN 1 BETA PRODUCTION            | 7    | -0.40438513  | 0.13909062  |
| FEMALE MEIOTIC DIVISION                                         | 22   | 0.260962397  | 0.14726524  |
| REGULATION OF GLUTAMATE SECRETION                               | 13   | 0.23693156   | 0.296800833 |
| NLS BEARING PROTEIN IMPORT INTO NUCLEUS                         | 22   | -0.059783974 | 0.728213381 |
| VACUOLE FUSION                                                  | 22   | 0.247721705  | 0.162804766 |
| SEMAPHORIN PLEXIN SIGNALING PATHWAY INVOLVED IN NEURON          | 13   | 0.361593481  | 0.102923814 |
| PROJECTION GUIDANCE                                             |      |              |             |
| POSITIVE REGULATION OF BONE REMODELING                          | 12   | 0.326747074  | 0.163798078 |
| HISTONE H3 K4 TRIMETHYLATION                                    | 12   | -0.369559738 | 0.071751575 |
| PRE MIRNA PROCESSING                                            | 13   | -0.376780943 | 0.055825718 |
| CELLULAR RESPONSE TO ESTROGEN STIMULUS                          | 36   | 0.187590325  | 0.178553165 |

|                                                                    |      |              |             |
|--------------------------------------------------------------------|------|--------------|-------------|
| LYTIC VACUOLE ORGANIZATION                                         | 44   | 0.072321442  | 0.56353184  |
| REGULATION OF CHEMOTAXIS                                           | 164  | 0.005748087  | 0.928773383 |
| NEGATIVE REGULATION OF RESPONSE TO STIMULUS                        | 1197 | -0.001693109 | 0.945201692 |
| MEIOTIC CELL CYCLE PROCESS                                         | 128  | 0.014529199  | 0.841879705 |
| REGULATION OF PLATELET ACTIVATION                                  | 28   | -0.089173837 | 0.555298224 |
| NEGATIVE REGULATION OF ACTIN FILAMENT POLYMERIZATION               | 37   | 0.028942725  | 0.830751283 |
| DEVELOPMENTAL CELL GROWTH                                          | 69   | 0.087706079  | 0.381736849 |
| REGULATION OF BONE RESORPTION                                      | 28   | -0.006261089 | 0.967679797 |
| SPINDLE ASSEMBLY                                                   | 64   | 0.00572325   | 0.95551381  |
| REGULATION OF SODIUM ION TRANSMEMBRANE TRANSPORTER ACTIVITY        | 34   | -0.075163129 | 0.585741497 |
| NEGATIVE REGULATION OF ANTIGEN RECEPTOR MEDIATED SIGNALING PATHWAY | 20   | 0.006834975  | 0.970256156 |
| CONVERGENT EXTENSION                                               | 12   | 0.233732221  | 0.32703872  |
| SPHINGOLIPID BIOSYNTHETIC PROCESS                                  | 69   | -0.048183441 | 0.621365098 |
| REGULATION OF PHOSPHOPROTEIN PHOSPHATASE ACTIVITY                  | 54   | -0.07234488  | 0.509337602 |
| REGULATION OF MULTI ORGANISM PROCESS                               | 412  | -0.00303468  | 0.940762129 |
| REGULATION OF TRANSLATIONAL FIDELITY                               | 15   | -0.265371079 | 0.175638264 |
| POSITIVE REGULATION OF CELL CYCLE ARREST                           | 79   | -0.100582812 | 0.263528082 |
| CONNECTIVE TISSUE DEVELOPMENT                                      | 167  | 0.124722195  | 0.054507423 |
| CYTOPLASMIC PATTERN RECOGNITION RECEPTOR SIGNALING PATHWAY         | 31   | -0.115121629 | 0.421126261 |
| PROTEIN LOCALIZATION                                               | 1621 | -0.034963438 | 0.101981968 |
| REGULATION OF STEROID BIOSYNTHETIC PROCESS                         | 40   | 0.165965753  | 0.208140041 |
| NUCLEAR ENVELOPE ORGANIZATION                                      | 80   | -0.299549619 | 0.000446039 |
| ASYMMETRIC PROTEIN LOCALIZATION                                    | 17   | 0.229116421  | 0.262450982 |
| REGULATION OF GLIAL CELL DIFFERENTIATION                           | 52   | 0.107254421  | 0.354449347 |
| BIOMINERAL TISSUE DEVELOPMENT                                      | 55   | -0.039214749 | 0.720196479 |
| CELLULAR RESPONSE TO ENDOGENOUS STIMULUS                           | 891  | 0.011020769  | 0.69706353  |
| SCHWANN CELL DEVELOPMENT                                           | 25   | -0.036749159 | 0.820914294 |
| POSITIVE REGULATION OF B CELL DIFFERENTIATION                      | 13   | 0.109957702  | 0.633737776 |
| POSITIVE REGULATION OF HISTONE METHYLATION                         | 32   | -0.21692812  | 0.110290396 |
| NEGATIVE REGULATION OF T CELL DIFFERENTIATION                      | 28   | -0.035033167 | 0.819394049 |
| RNA POLYADENYLATION                                                | 28   | 0.020809677  | 0.893486324 |
| NEUROTRANSMITTER METABOLIC PROCESS                                 | 17   | 0.504974855  | 0.006490305 |
| ORGANELLE INHERITANCE                                              | 11   | -0.321978266 | 0.144447729 |
| AUTONOMIC NERVOUS SYSTEM DEVELOPMENT                               | 35   | -0.039203343 | 0.774999052 |
| ASPARTATE FAMILY AMINO ACID METABOLIC PROCESS                      | 49   | 0.038928323  | 0.741350116 |
| EXPLORATION BEHAVIOR                                               | 17   | 0.157926219  | 0.435226462 |
| POSITIVE REGULATION OF MUSCLE TISSUE DEVELOPMENT                   | 52   | 0.198519582  | 0.087272446 |
| MRNA METABOLIC PROCESS                                             | 577  | -0.136214528 | 5.19E-05    |
| RESPONSE TO THYROID HORMONE                                        | 20   | -0.218990452 | 0.194682028 |
| PROTEIN TRANSMEMBRANE TRANSPORT                                    | 48   | 0.154695274  | 0.199787678 |
| INTRINSIC APOPTOTIC SIGNALING PATHWAY BY P53 CLASS MEDIATOR        | 50   | 0.030536156  | 0.793373776 |
| RESPONSE TO RETINOIC ACID                                          | 94   | 0.018116526  | 0.831133213 |
| MAMMARY GLAND LOBULE DEVELOPMENT                                   | 15   | -0.249985671 | 0.201170443 |
| PARAXIAL MESODERM DEVELOPMENT                                      | 16   | 0.31778996   | 0.114833585 |
| ODONTOGENESIS OF DENTIN CONTAINING TOOTH                           | 61   | 0.0438166    | 0.678909781 |
| DIACYLGLYCEROL METABOLIC PROCESS                                   | 11   | -0.119583832 | 0.616270782 |
| COCHLEA MORPHOGENESIS                                              | 19   | -0.180682648 | 0.309575416 |
| NEGATIVE REGULATION OF LIPID CATABOLIC PROCESS                     | 18   | 0.257933884  | 0.183013838 |
| REGULATION OF TRANSLATIONAL INITIATION                             | 78   | -0.124693167 | 0.165901632 |
| MOTILE CILIUM ASSEMBLY                                             | 12   | -0.104597132 | 0.649108875 |
| POSITIVE REGULATION OF FATTY ACID OXIDATION                        | 13   | 0.38826745   | 0.075280637 |
| NEGATIVE REGULATION OF ALPHA BETA T CELL ACTIVATION                | 20   | 0.09984876   | 0.590676076 |
| MYELOID CELL ACTIVATION INVOLVED IN IMMUNE RESPONSE                | 35   | -0.076284852 | 0.57412069  |
| POSITIVE REGULATION OF SYNAPTIC TRANSMISSION                       | 88   | -0.013328922 | 0.878511346 |
| CELL RECOGNITION                                                   | 92   | -0.026805616 | 0.752547603 |
| REGULATION OF RETROGRADE PROTEIN TRANSPORT ER TO CYTOSOL           | 12   | -0.586852729 | 0.001417178 |
| PROTEIN K63 LINKED UBIQUITINATION                                  | 34   | 0.047938411  | 0.735154186 |
| NEGATIVE REGULATION OF PHOSPHORYLATION                             | 381  | -0.044177479 | 0.293340795 |
| NEGATIVE REGULATION OF NUCLEAR DIVISION                            | 42   | -0.226271014 | 0.053308526 |
| NEGATIVE REGULATION OF ENDOPLASMIC RETICULUM STRESS INDUCED        | 19   | -0.078167095 | 0.670964432 |
| INTRINSIC APOPTOTIC SIGNALING PATHWAY                              | 79   | 0.021320316  | 0.818065778 |
| REGULATION OF GENERATION OF PRECURSOR METABOLITES AND ENERGY       | 11   | -0.199010843 | 0.388395315 |
| MESENCHYMAL CELL PROLIFERATION                                     | 195  | 0.091167029  | 0.127669406 |
| LIPID CATABOLIC PROCESS                                            | 12   | 0.52162585   | 0.011404265 |
| REVERSE CHOLESTEROL TRANSPORT                                      |      |              |             |

|                                                                                   |     |              |             |
|-----------------------------------------------------------------------------------|-----|--------------|-------------|
| POSITIVE REGULATION OF LIPID METABOLIC PROCESS                                    | 110 | 0.07404341   | 0.350610957 |
| REGULATION OF CHOLESTEROL STORAGE                                                 | 12  | 0.05053842   | 0.832438286 |
| PROTEIN LOCALIZATION TO SYNAPSE                                                   | 12  | -0.058604351 | 0.80121926  |
| PROSTATE GLAND GROWTH                                                             | 11  | -0.340524997 | 0.109184268 |
| NEGATIVE REGULATION OF CARDIAC MUSCLE CELL APOPTOTIC PROCESS                      | 11  | -0.073575548 | 0.761182071 |
| REGULATION OF INSULIN LIKE GROWTH FACTOR RECEPTOR SIGNALING PATHWAY               | 19  | -0.008567749 | 0.963539967 |
| RESPIRATORY SYSTEM DEVELOPMENT                                                    | 175 | 0.081777559  | 0.195126673 |
| ION HOMEOSTASIS                                                                   | 466 | 0.066552493  | 0.08754313  |
| EPITHELIAL TO MESENCHYMAL TRANSITION INVOLVED IN ENDOCARDIAL CUSHION FORMATION    | 11  | 0.275155616  | 0.263477539 |
| NEGATIVE REGULATION OF STAT CASCADE                                               | 37  | 0.010075317  | 0.940478894 |
| REGULATION OF SYNAPTIC TRANSMISSION GABAERGIC                                     | 19  | 0.008429065  | 0.964262375 |
| NUCLEOSIDE TRIPHOSPHATE CATABOLIC PROCESS                                         | 11  | 0.395001532  | 0.108130486 |
| NEUROEPITHELIAL CELL DIFFERENTIATION                                              | 52  | 0.034284769  | 0.764412739 |
| NUCLEOSIDE MONOPHOSPHATE METABOLIC PROCESS                                        | 224 | -0.122653885 | 0.021415074 |
| REGULATION OF GLUCOSE TRANSPORT                                                   | 90  | -0.199930242 | 0.014726802 |
| MATURE B CELL DIFFERENTIATION INVOLVED IN IMMUNE RESPONSE                         | 12  | 0.059993447  | 0.801711019 |
| CATECHOLAMINE TRANSPORT                                                           | 9   | -0.114458203 | 0.665245311 |
| NEGATIVE REGULATION OF MYELOID CELL APOPTOTIC PROCESS                             | 13  | 0.076790135  | 0.738191483 |
| NEGATIVE REGULATION OF TRANSFORMING GROWTH FACTOR BETA RECEPTOR SIGNALING PATHWAY | 59  | 0.107986057  | 0.320636747 |
| ADHERENS JUNCTION ORGANIZATION                                                    | 66  | -0.06474756  | 0.514531316 |
| EPITHELIAL CELL MORPHOGENESIS                                                     | 40  | 0.125536774  | 0.342824768 |
| POSITIVE REGULATION OF OSTEOBLAST DIFFERENTIATION                                 | 57  | -0.060531128 | 0.571585048 |
| OSTEOBLAST DEVELOPMENT                                                            | 16  | 0.063103887  | 0.760299542 |
| MYD88 INDEPENDENT TOLL LIKE RECEPTOR SIGNALING PATHWAY                            | 29  | 0.295478969  | 0.054134673 |
| NEGATIVE REGULATION OF SIGNAL TRANSDUCTION BY P53 CLASS MEDIATOR                  | 27  | -0.010902055 | 0.944705887 |
| POSITIVE REGULATION OF DNA RECOMBINATION                                          | 16  | -0.186617129 | 0.336691001 |
| REGULATION OF PEPTIDYL SERINE PHOSPHORYLATION OF STAT PROTEIN                     | 9   | 0.325761378  | 0.225609174 |
| HISTONE H4 K16 ACETYLATION                                                        | 19  | 0.294780325  | 0.128874138 |
| POSITIVE REGULATION OF NATURAL KILLER CELL ACTIVATION                             | 17  | 0.004473432  | 0.982038624 |
| POSITIVE REGULATION OF MESENCHYMAL CELL PROLIFERATION                             | 23  | -0.216294756 | 0.175721943 |
| CHRONIC INFLAMMATORY RESPONSE                                                     | 13  | -0.344651155 | 0.077564251 |
| POSITIVE REGULATION OF LIPASE ACTIVITY                                            | 50  | -0.125700754 | 0.262561656 |
| POSITIVE REGULATION OF ERK1 AND ERK2 CASCADE                                      | 138 | 0.055952588  | 0.428391442 |
| MEMBRANE ORGANIZATION                                                             | 806 | -0.025968507 | 0.378108827 |
| CAMP METABOLIC PROCESS                                                            | 28  | 0.115459493  | 0.462644634 |
| MITOCHONDRIAL ATP SYNTHESIS COUPLED PROTON TRANSPORT                              | 17  | -0.219779101 | 0.233340993 |
| CELLULAR RESPONSE TO OXYGEN RADICAL                                               | 12  | -0.30984026  | 0.134472057 |
| REGULATION OF CILUM MOVEMENT                                                      | 8   | -0.149901889 | 0.586017152 |
| PURINE NUCLEOSIDE MONOPHOSPHATE BIOSYNTHETIC PROCESS                              | 57  | -0.147079443 | 0.157323124 |
| POSITIVE REGULATION OF PEPTIDE SECRETION                                          | 75  | -0.016964311 | 0.857283429 |
| RESPONSE TO DEXAMETHASONE                                                         | 29  | -0.030770659 | 0.838478314 |
| STEROL TRANSPORT                                                                  | 39  | 0.412755202  | 0.002112886 |
| ORGANONITROGEN COMPOUND BIOSYNTHETIC PROCESS                                      | 906 | -0.15056437  | 2.92E-08    |
| SOMATIC DIVERSIFICATION OF IMMUNE RECEPTORS VIA SOMATIC MUTATION                  | 13  | -0.44982696  | 0.022747724 |
| REGULATION OF CHROMOSOME ORGANIZATION                                             | 259 | -0.060744987 | 0.229570127 |
| EMBRYONIC EYE MORPHOGENESIS                                                       | 28  | -0.002181859 | 0.98874449  |
| BLASTOCYST GROWTH                                                                 | 16  | -0.173262446 | 0.376508463 |
| ESTROGEN BIOSYNTHETIC PROCESS                                                     | 9   | 0.499487244  | 0.041332519 |
| REGULATION OF CELL MATRIX ADHESION                                                | 84  | -0.018127127 | 0.838856296 |
| VISUAL BEHAVIOR                                                                   | 42  | 0.015646467  | 0.901806523 |
| LIPOSACCHARIDE METABOLIC PROCESS                                                  | 99  | -0.068116541 | 0.40079373  |
| REGULATION OF CELL ADHESION                                                       | 558 | -0.038856941 | 0.26692256  |
| INTRACELLULAR LIPID TRANSPORT                                                     | 19  | -0.173996266 | 0.332000714 |
| POSITIVE REGULATION OF INTERFERON ALPHA PRODUCTION                                | 15  | -0.19344061  | 0.330893311 |
| NEGATIVE REGULATION OF FATTY ACID BIOSYNTHETIC PROCESS                            | 13  | 0.131583006  | 0.568221042 |
| NEGATIVE REGULATION OF TELOMERE MAINTENANCE                                       | 25  | -0.310791145 | 0.038839637 |
| POSITIVE REGULATION OF TRANSCRIPTION FROM RNA POLYMERASE II PROMOTER              | 888 | 0.017319685  | 0.541801778 |
| REGULATION OF ACTIN FILAMENT DEPOLYMERIZATION                                     | 42  | 0.014006134  | 0.912023604 |
| ENDOCRINE SYSTEM DEVELOPMENT                                                      | 99  | 0.003618276  | 0.965038623 |
| REGULATION OF MYELOID LEUKOCYTE DIFFERENTIATION                                   | 94  | -0.064308477 | 0.440206509 |
| HYDROGEN PEROXIDE METABOLIC PROCESS                                               | 19  | -0.142877725 | 0.426808887 |
| RESPONSE TO DSRNA                                                                 | 60  | -0.109289586 | 0.287094636 |

|                                                                  |      |              |             |
|------------------------------------------------------------------|------|--------------|-------------|
| REGULATION OF INTRINSIC APOPTOTIC SIGNALING PATHWAY BY P53 CLASS | 22   | 0.162559798  | 0.361190221 |
| MEDIATOR                                                         |      |              |             |
| GLYCEROLIPID CATABOLIC PROCESS                                   | 28   | 0.197530442  | 0.213155714 |
| POSITIVE REGULATION OF ACTIN FILAMENT POLYMERIZATION             | 60   | 0.060335927  | 0.572769355 |
| AMINE CATABOLIC PROCESS                                          | 18   | 0.0443729    | 0.819568862 |
| REGULATION OF STEROID METABOLIC PROCESS                          | 61   | 0.205161284  | 0.054336842 |
| MATURE B CELL DIFFERENTIATION                                    | 16   | 0.147941063  | 0.478647083 |
| NEGATIVE REGULATION OF MUSCLE TISSUE DEVELOPMENT                 | 31   | 0.037590185  | 0.799744609 |
| C21 STEROID HORMONE BIOSYNTHETIC PROCESS                         | 10   | 0.001389925  | 0.995715645 |
| EPITHELIAL CELL DIFFERENTIATION INVOLVED IN KIDNEY DEVELOPMENT   | 19   | -0.299202105 | 0.074471283 |
| STEROL BIOSYNTHETIC PROCESS                                      | 38   | -0.133158557 | 0.297958707 |
| DE NOVO PROTEIN FOLDING                                          | 19   | 0.022440088  | 0.905321077 |
| REGULATION OF PHAGOCYTOSIS                                       | 55   | 0.106759981  | 0.341632381 |
| DNA INTEGRITY CHECKPOINT                                         | 137  | -0.100102757 | 0.144127378 |
| MEMBRANE PROTEIN PROTEOLYSIS                                     | 30   | -0.401291888 | 0.002615049 |
| POSITIVE REGULATION OF OSTEOBLAST PROLIFERATION                  | 10   | 0.352196943  | 0.166279968 |
| TRNA THREONYLCARBAMOYLADENOSINE METABOLIC PROCESS                | 10   | -0.281975049 | 0.221118569 |
| TUBE MORPHOGENESIS                                               | 288  | -0.032280678 | 0.504153667 |
| ARP2 3 COMPLEX MEDIATED ACTIN NUCLEATION                         | 16   | 0.226102942  | 0.278259101 |
| REGULATION OF HYDROGEN PEROXIDE METABOLIC PROCESS                | 13   | -0.139894584 | 0.521559386 |
| REGULATION OF EMBRYONIC DEVELOPMENT                              | 106  | 0.019275336  | 0.809717355 |
| SENSORY ORGAN DEVELOPMENT                                        | 406  | 0.002873142  | 0.944375427 |
| RETINA VASCULATURE DEVELOPMENT IN CAMERA TYPE EYE                | 13   | -0.234230431 | 0.262527072 |
| POSITIVE REGULATION OF MAP KINASE ACTIVITY                       | 183  | -0.028312639 | 0.639553386 |
| BONE MORPHOGENESIS                                               | 63   | -0.077772332 | 0.442214208 |
| CELL PROJECTION ORGANIZATION                                     | 781  | 0.021783504  | 0.470479732 |
| REGULATION OF MEMBRANE INVAGINATION                              | 11   | 0.411435802  | 0.074066275 |
| ISOPRENOID BIOSYNTHETIC PROCESS                                  | 23   | 0.160825649  | 0.354675308 |
| NEGATIVE REGULATION OF PROTEIN METABOLIC PROCESS                 | 952  | -0.010496003 | 0.700993838 |
| NEGATIVE REGULATION OF NUCLEOTIDE CATABOLIC PROCESS              | 13   | 0.358432189  | 0.104048959 |
| RETROGRADE TRANSPORT ENDOSOME TO GOLGI                           | 68   | 0.048704243  | 0.627457706 |
| MITOCHONDRIAL GENOME MAINTENANCE                                 | 23   | -0.20009822  | 0.216767143 |
| COENZYME CATABOLIC PROCESS                                       | 10   | 0.514920676  | 0.034933319 |
| POSITIVE REGULATION OF MYELOID LEUKOCYTE CYTOKINE PRODUCTION     |      |              |             |
| INVOLVED IN IMMUNE RESPONSE                                      | 11   | 0.345729892  | 0.151930732 |
| NEGATIVE REGULATION OF NEURAL PRECURSOR CELL PROLIFERATION       | 19   | 0.042388556  | 0.822867827 |
| GLUCAN BIOSYNTHETIC PROCESS                                      | 23   | 0.240527953  | 0.166924784 |
| LINOLEIC ACID METABOLIC PROCESS                                  | 10   | 0.533212995  | 0.015567044 |
| NEGATIVE REGULATION OF COFACTOR METABOLIC PROCESS                | 10   | 0.192897671  | 0.460269704 |
| MRNA CIS SPLICING VIA SPLICEOSOME                                | 15   | -0.479672551 | 0.007097249 |
| VIRAL LATENCY                                                    | 11   | -0.233586977 | 0.307988103 |
| CYTOPLASMIC SEQUESTERING OF PROTEIN                              | 38   | 0.024728504  | 0.85311485  |
| REGULATION OF SPINDLE ASSEMBLY                                   | 14   | 0.268214826  | 0.223882353 |
| NEGATIVE REGULATION OF STEROL TRANSPORT                          | 9    | 0.119632561  | 0.669468696 |
| REGULATION OF INFLAMMATORY RESPONSE                              | 236  | 0.111055569  | 0.041867104 |
| OLIGODENDROCYTE DEVELOPMENT                                      | 28   | -0.029023078 | 0.850243316 |
| RESPONSE TO INTERFERON GAMMA                                     | 114  | 0.104536628  | 0.181646724 |
| CARDIAC EPITHELIAL TO MESENCHYMAL TRANSITION                     | 23   | 0.231653622  | 0.181637851 |
| PROTEIN LOCALIZATION TO MITOCHONDRION                            | 65   | 0.068040609  | 0.508416205 |
| NEGATIVE REGULATION OF MULTICELLULAR ORGANISMAL METABOLIC        |      |              |             |
| PROCESS                                                          | 10   | -0.502365695 | 0.02042618  |
| NEGATIVE REGULATION OF ENDOTHELIAL CELL PROLIFERATION            | 28   | -0.126687858 | 0.396270723 |
| POSITIVE REGULATION OF BLOOD CIRCULATION                         | 76   | 0.133501359  | 0.162844331 |
| MICROTUBULE BASED MOVEMENT                                       | 174  | -0.042700715 | 0.489416605 |
| SENSORY ORGAN MORPHOGENESIS                                      | 198  | -0.004730617 | 0.93550571  |
| PROTEIN DNA COMPLEX SUBUNIT ORGANIZATION                         | 203  | 0.006448656  | 0.911290954 |
| RESPONSE TO HYDROPEROXIDE                                        | 14   | -0.001237351 | 0.995485179 |
| PROTEIN COMPLEX SUBUNIT ORGANIZATION                             | 1350 | -0.048199636 | 0.037174442 |
| REGULATION OF ACTIN FILAMENT BASED MOVEMENT                      | 30   | -0.147118541 | 0.304496394 |
| CHROMATIN SILENCING                                              | 79   | -0.016386507 | 0.858542998 |
| MAINTENANCE OF PROTEIN LOCATION IN NUCLEUS                       | 13   | -0.111353757 | 0.614107469 |
| CELLULAR RESPONSE TO ESTRADIOL STIMULUS                          | 27   | 0.217535278  | 0.178102681 |
| LOCOMOTORY BEHAVIOR                                              | 144  | 0.040114243  | 0.56111435  |
| RESPONSE TO EPINEPHRINE                                          | 14   | 0.34191265   | 0.106947666 |
| REGULATION OF MACROPHAGE DIFFERENTIATION                         | 17   | 0.036324626  | 0.855857827 |
| REGULATION OF PROTEIN LOCALIZATION TO NUCLEUS                    | 198  | -0.012171314 | 0.83481068  |

|                                                                              |     |              |             |
|------------------------------------------------------------------------------|-----|--------------|-------------|
| NUCLEUS ORGANIZATION                                                         | 124 | -0.189674516 | 0.007039449 |
| TRABECULA FORMATION                                                          | 22  | 0.115616267  | 0.515961761 |
| SUBSTRATE DEPENDENT CELL MIGRATION                                           | 26  | 0.019421847  | 0.904102783 |
| SYNAPTIC TRANSMISSION GLUTAMATERGIC                                          | 18  | -0.076502477 | 0.686112132 |
| REGULATION OF SEQUENCE SPECIFIC DNA BINDING TRANSCRIPTION FACTOR<br>ACTIVITY | 326 | 0.01613172   | 0.725551883 |
| RETINA HOMEOSTASIS                                                           | 46  | 0.013656258  | 0.910243118 |
| POSITIVE REGULATION OF HUMORAL IMMUNE RESPONSE                               | 11  | 0.078534405  | 0.753140668 |
| MITOCHONDRION MORPHOGENESIS                                                  | 17  | 0.078813163  | 0.695116723 |
| COPPER ION HOMEOSTASIS                                                       | 14  | 0.079496327  | 0.720258192 |
| STEM CELL DIFFERENTIATION                                                    | 174 | 0.116835858  | 0.065732592 |
| DOPAMINERGIC NEURON DIFFERENTIATION                                          | 25  | -0.184320463 | 0.237640501 |
| MAGNESIUM ION TRANSMEMBRANE TRANSPORT                                        | 16  | 0.177098955  | 0.398557883 |
| ENDOPLASMIC RETICULUM ORGANIZATION                                           | 35  | 0.179041903  | 0.206168976 |
| REGULATION OF CHOLESTEROL METABOLIC PROCESS                                  | 20  | 0.255761068  | 0.165239017 |
| SCHWANN CELL DIFFERENTIATION                                                 | 30  | -0.020998988 | 0.887766033 |
| DIVALENT INORGANIC ANION HOMEOSTASIS                                         | 9   | 0.094539214  | 0.733064285 |
| PROTEIN COMPLEX LOCALIZATION                                                 | 45  | 0.143744486  | 0.251449329 |
| NEGATIVE REGULATION OF GTPASE ACTIVITY                                       | 39  | 0.03625695   | 0.78369276  |
| PROTEIN HOMOTRIMERIZATION                                                    | 16  | 0.103424165  | 0.618651597 |
| RESPONSE TO MINERALOCORTICOID                                                | 33  | 0.058332706  | 0.685961888 |
| POSITIVE REGULATION OF INTRINSIC APOPTOTIC SIGNALING PATHWAY                 | 47  | 0.085853029  | 0.479471672 |
| REGULATION OF TYROSINE PHOSPHORYLATION OF STAT5 PROTEIN                      | 17  | -0.002878962 | 0.988421708 |
| NEGATIVE REGULATION OF LEUKOCYTE CHEMOTAXIS                                  | 10  | 0.208968797  | 0.425030644 |
| NEGATIVE REGULATION OF MULTI ORGANISM PROCESS                                | 127 | 0.019678163  | 0.78803093  |
| COENZYME A BIOSYNTHETIC PROCESS                                              | 10  | 0.049771434  | 0.848846793 |
| NEGATIVE REGULATION OF DIGESTIVE SYSTEM PROCESS                              | 12  | 0.316708559  | 0.185196524 |
| NUCLEOSIDE TRANSPORT                                                         | 16  | -0.10158206  | 0.610455518 |
| NEURON DIFFERENTIATION                                                       | 751 | 0.060109736  | 0.052188162 |
| FLAVONOID METABOLIC PROCESS                                                  | 16  | 0.350721954  | 0.076271182 |
| PROTEASOMAL PROTEIN CATABOLIC PROCESS                                        | 257 | -0.069780205 | 0.168328454 |
| UDP N ACETYLGUCOSAMINE METABOLIC PROCESS                                     | 13  | -0.015258622 | 0.946218268 |
| FERTILIZATION                                                                | 100 | -0.004286679 | 0.958307892 |
| POSITIVE REGULATION OF INTERLEUKIN 2 PRODUCTION                              | 31  | 0.141909338  | 0.345689866 |
| GOLGI LOCALIZATION                                                           | 12  | -0.256607625 | 0.237542135 |
| G2 DNA DAMAGE CHECKPOINT                                                     | 31  | 0.206998876  | 0.167809614 |
| ACTIVATION OF INNATE IMMUNE RESPONSE                                         | 183 | -0.123885113 | 0.03545807  |
| REGULATION OF CELL PROJECTION ASSEMBLY                                       | 137 | 0.050292075  | 0.477983985 |
| REGULATION OF HEART GROWTH                                                   | 38  | 0.120703703  | 0.371677763 |
| IONOTROPIC GLUTAMATE RECEPTOR SIGNALING PATHWAY                              | 19  | -0.138601533 | 0.441648062 |
| NEURON FATE COMMITMENT                                                       | 49  | 0.311465047  | 0.008795243 |
| REGULATION OF CELLULAR RESPIRATION                                           | 20  | 0.155746059  | 0.405014329 |
| REGULATION OF TELOMERE CAPPING                                               | 20  | 0.264608755  | 0.159801561 |
| TROPHECTODERMAL CELL DIFFERENTIATION                                         | 14  | -0.070997662 | 0.741504689 |
| SPERMATID DIFFERENTIATION                                                    | 90  | 0.055452544  | 0.525676311 |
| GOLGI VESICLE TRANSPORT                                                      | 295 | -0.043207499 | 0.3644906   |
| RESPONSE TO X RAY                                                            | 26  | -0.370575508 | 0.009456594 |
| NUCLEOPHAGY                                                                  | 18  | 0.014587937  | 0.939909343 |
| APOPTOTIC PROCESS INVOLVED IN MORPHOGENESIS                                  | 15  | 0.390714142  | 0.054793753 |
| GLIAL CELL DIFFERENTIATION                                                   | 118 | 0.153985293  | 0.046348581 |
| PHOSPHATIDYLSERINE METABOLIC PROCESS                                         | 23  | 0.099000165  | 0.568047515 |
| NEURAL TUBE FORMATION                                                        | 92  | -0.178865456 | 0.028320895 |
| REGULATION OF CELL CYCLE PHASE TRANSITION                                    | 305 | -0.100357154 | 0.029829978 |
| PROTEIN K63 LINKED DEUBIQUITINATION                                          | 22  | -0.22798905  | 0.166467563 |
| ATP HYDROLYSIS COUPLED TRANSMEMBRANE TRANSPORT                               | 32  | 0.056572696  | 0.698914319 |
| SEMAPHORIN PLEXIN SIGNALING PATHWAY                                          | 35  | 0.142180604  | 0.316644878 |
| REGULATION OF REACTIVE OXYGEN SPECIES BIOSYNTHETIC PROCESS                   | 59  | 0.131442121  | 0.226011146 |
| REGULATION OF NEUROTRANSMITTER RECEPTOR ACTIVITY                             | 25  | 0.042139863  | 0.798561662 |
| POSITIVE REGULATION OF FATTY ACID METABOLIC PROCESS                          | 27  | 0.269375586  | 0.091311287 |
| CEREBELLAR CORTEX FORMATION                                                  | 18  | -0.227224458 | 0.205591599 |
| REGULATION OF PEPTIDE SECRETION                                              | 178 | -0.046463891 | 0.446326507 |
| PYRIMIDINE NUCLEOSIDE CATABOLIC PROCESS                                      | 17  | 0.118308059  | 0.557213785 |
| NEGATIVE REGULATION OF ORGANIC ACID TRANSPORT                                | 17  | 0.224311167  | 0.264645271 |
| KETONE BODY METABOLIC PROCESS                                                | 7   | 0.089594029  | 0.775238637 |
| POSITIVE REGULATION OF INTERLEUKIN 13 PRODUCTION                             | 11  | 0.310477523  | 0.235859529 |
| REGULATION OF TYROSINE PHOSPHORYLATION OF STAT3 PROTEIN                      | 39  | -0.048491327 | 0.708529202 |

|                                                              |      |              |             |
|--------------------------------------------------------------|------|--------------|-------------|
| HEART GROWTH                                                 | 22   | 0.071788973  | 0.684908998 |
| LYMPHOCYTE MIGRATION                                         | 32   | 0.168245473  | 0.250819351 |
| LOW DENSITY LIPOPROTEIN PARTICLE REMODELING                  | 8    | 0.651679074  | 0.003068689 |
| POSITIVE REGULATION OF PROTEIN SUMOYLATION                   | 10   | -0.087489798 | 0.729141522 |
| ADULT HEART DEVELOPMENT                                      | 10   | -0.179634174 | 0.464782902 |
| NEGATIVE REGULATION OF PROTEIN ACETYLATION                   | 17   | -0.169782303 | 0.366547075 |
| POSITIVE REGULATION OF DEVELOPMENTAL PROCESS                 | 1001 | 0.023537763  | 0.381115455 |
| RESPONSE TO BIOTIC STIMULUS                                  | 692  | -0.014414116 | 0.64976178  |
| OUTFLOW TRACT MORPHOGENESIS                                  | 50   | 0.094885564  | 0.420031147 |
| NUCLEAR EXPORT                                               | 141  | -0.195376693 | 0.00308131  |
| MEMBRANE INVAGINATION                                        | 26   | 0.051021042  | 0.753193976 |
| NEGATIVE REGULATION OF ERAD PATHWAY                          | 12   | -0.608157829 | 0.000843248 |
| AROMATIC AMINO ACID FAMILY CATABOLIC PROCESS                 | 18   | 0.288912359  | 0.130377138 |
| RESPONSE TO TRANSITION METAL NANOPARTICLE                    | 125  | -0.071088604 | 0.324620942 |
| REGULATION OF ACTIN CYTOSKELETON REORGANIZATION              | 29   | -0.109587873 | 0.458185631 |
| HYDROGEN TRANSPORT                                           | 106  | -0.167130241 | 0.027870313 |
| REGULATION OF OXIDATIVE STRESS INDUCED NEURON DEATH          | 11   | 0.110029167  | 0.660738778 |
| ER TO GOLGI VESICLE MEDIATED TRANSPORT                       | 159  | -0.10126814  | 0.111370265 |
| RESPONSE TO TOXIC SUBSTANCE                                  | 213  | -0.071258639 | 0.198936151 |
| REGULATION OF PROTEIN MODIFICATION PROCESS                   | 1483 | -0.010179186 | 0.648482325 |
| CELLULAR RESPONSE TO INTERLEUKIN 6                           | 19   | 0.1344575    | 0.486198882 |
| POSITIVE REGULATION OF TRANSCRIPTION FROM RNA POLYMERASE I   |      |              |             |
| PROMOTER                                                     | 14   | -0.04170321  | 0.847367041 |
| CELL MORPHOGENESIS INVOLVED IN NEURON DIFFERENTIATION        | 319  | 0.107172785  | 0.022974332 |
| STRIATUM DEVELOPMENT                                         | 15   | -0.11649127  | 0.56894509  |
| NEUTROPHIL MEDIATED IMMUNITY                                 | 18   | -0.526091129 | 0.001590764 |
| NEGATIVE REGULATION OF CHROMATIN MODIFICATION                | 42   | 0.094169382  | 0.4631973   |
| CELLULAR CHEMICAL HOMEOSTASIS                                | 461  | 0.014941447  | 0.70024249  |
| CELLULAR RESPONSE TO LEPTIN STIMULUS                         | 16   | 0.059354282  | 0.77397305  |
| EPITHELIAL CELL PROLIFERATION                                | 80   | -0.035480566 | 0.696494866 |
| NEGATIVE REGULATION OF PEPTIDYL SERINE PHOSPHORYLATION       | 23   | 0.227084498  | 0.193498703 |
| REGULATION OF LIPOPROTEIN METABOLIC PROCESS                  | 11   | 0.256025819  | 0.301943051 |
| POSITIVE REGULATION OF NUCLEAR DIVISION                      | 55   | -0.050185865 | 0.645817825 |
| REGULATION OF COFACTOR METABOLIC PROCESS                     | 45   | -0.101892368 | 0.391338845 |
| MYOTUBE CELL DEVELOPMENT                                     | 25   | -0.021345722 | 0.895769476 |
| PHOSPHATIDYLGlycerol ACYL CHAIN REMODELING                   | 12   | 0.289122262  | 0.226663359 |
| FIBRINOLYSIS                                                 | 17   | 0.103198244  | 0.60808593  |
| MONOCARBOXYLIC ACID CATABOLIC PROCESS                        | 79   | 0.158597944  | 0.090845185 |
| THIOESTER BIOSYNTHETIC PROCESS                               | 43   | -0.127674833 | 0.290155756 |
| KERATINIZATION                                               | 23   | 0.378191032  | 0.022246525 |
| POSITIVE REGULATION OF CELL DEVELOPMENT                      | 415  | 0.017921424  | 0.660988612 |
| MONOSACCHARIDE METABOLIC PROCESS                             | 169  | -0.0248697   | 0.692688476 |
| REGULATION OF CELL FATE SPECIFICATION                        | 10   | 0.197752363  | 0.452352633 |
| CELLULAR CARBOHYDRATE BIOSYNTHETIC PROCESS                   | 47   | -0.014552199 | 0.902771954 |
| TRANSMEMBRANE RECEPTOR PROTEIN TYROSINE KINASE SIGNALING     |      |              |             |
| PATHWAY                                                      | 440  | -0.015590181 | 0.69270924  |
| REGULATION OF INTERLEUKIN 6 BIOSYNTHETIC PROCESS             | 12   | 0.089749343  | 0.708220226 |
| NEGATIVE REGULATION OF MUSCLE HYPERTROPHY                    | 11   | 0.337849562  | 0.17781015  |
| POSITIVE REGULATION OF CATENIN IMPORT INTO NUCLEUS           | 9    | 0.143727315  | 0.60506623  |
| RECOMBINATIONAL REPAIR                                       | 72   | -0.011005561 | 0.909108544 |
| RECIPROCAL DNA RECOMBINATION                                 | 35   | -0.035620523 | 0.795310581 |
| POSITIVE REGULATION OF CELL KILLING                          | 33   | 0.036263313  | 0.800594696 |
| POSITIVE REGULATION OF NUCLEASE ACTIVITY                     | 15   | -0.07709184  | 0.710167458 |
| REGULATION OF MICROTUBULE POLYMERIZATION OR DEPOLYMERIZATION | 162  | 0.024489283  | 0.706105042 |
| NEGATIVE REGULATION OF OSSIFICATION                          | 62   | 0.045406377  | 0.66540194  |
| REGULATION OF SKELETAL MUSCLE CONTRACTION                    | 7    | -0.518268045 | 0.039890391 |
| CELLULAR RESPONSE TO PEPTIDE                                 | 239  | 0.004267378  | 0.936288473 |
| REGULATION OF DNA REPLICATION                                | 148  | -0.008088543 | 0.904555177 |
| C TERMINAL PROTEIN AMINO ACID MODIFICATION                   | 11   | 0.083057997  | 0.739753195 |
| REGULATION OF ORGANELLE ASSEMBLY                             | 134  | 0.014284161  | 0.840981415 |
| NUCLEAR TRANSCRIBED MRNA CATABOLIC PROCESS NONSENSE MEDIATED |      |              |             |
| DECAY                                                        | 117  | -0.17484412  | 0.015637763 |
| NEGATIVE REGULATION OF CELL ADHESION                         | 198  | -0.047723162 | 0.409658156 |
| NEGATIVE REGULATION OF ALPHA BETA T CELL DIFFERENTIATION     | 13   | -0.04635673  | 0.836314642 |
| CELLULAR TRANSITION METAL ION HOMEOSTASIS                    | 63   | 0.065226214  | 0.532711962 |
| CELL CELL RECOGNITION                                        | 36   | 0.035258806  | 0.797561981 |

|                                                                                                                 |     |              |             |
|-----------------------------------------------------------------------------------------------------------------|-----|--------------|-------------|
| NEGATIVE REGULATION OF DNA METABOLIC PROCESS                                                                    | 99  | -0.074443374 | 0.358243369 |
| SKELETAL MUSCLE CELL DIFFERENTIATION                                                                            | 45  | 0.105578995  | 0.395070626 |
| RNA 3 END PROCESSING                                                                                            | 95  | -0.224564632 | 0.004307812 |
| RESPONSE TO ANTIBIOTIC                                                                                          | 43  | -0.084158738 | 0.49129153  |
| REGULATION OF SYSTEMIC ARTERIAL BLOOD PRESSURE BY RENIN<br>ANGIOTENSIN                                          | 16  | 0.149598749  | 0.471229162 |
| POSITIVE REGULATION OF LIPID BIOSYNTHETIC PROCESS                                                               | 54  | 0.144799743  | 0.20325364  |
| CELL ADHESION MEDIATED BY INTEGRIN                                                                              | 12  | -0.316506713 | 0.141694426 |
| CELL FATE SPECIFICATION                                                                                         | 53  | 0.015304829  | 0.892188017 |
| CELLULAR RESPONSE TO GLUCOSE STARVATION                                                                         | 31  | -0.076654982 | 0.595193546 |
| REGULATION OF ENDOPLASMIC RETICULUM UNFOLDED PROTEIN RESPONSE                                                   | 28  | -0.044951323 | 0.769029498 |
| WOUND HEALING SPREADING OF EPIDERMAL CELLS                                                                      | 8   | 0.106859136  | 0.719512492 |
| POSITIVE REGULATION OF TRANSPORT                                                                                | 790 | -0.020991356 | 0.480772009 |
| MONOCYTE CHEMOTAXIS                                                                                             | 27  | -0.108866218 | 0.476119619 |
| CEREBRAL CORTEX CELL MIGRATION                                                                                  | 42  | -0.029716389 | 0.812902311 |
| POSITIVE REGULATION OF WNT SIGNALING PATHWAY                                                                    | 137 | -0.02030639  | 0.771400152 |
| FOLIC ACID CONTAINING COMPOUND METABOLIC PROCESS                                                                | 25  | 0.020807687  | 0.899303539 |
| MYELOID CELL DIFFERENTIATION                                                                                    | 169 | -0.07445689  | 0.231246598 |
| REGULATION OF CELLULAR COMPONENT MOVEMENT                                                                       | 696 | 0.002569389  | 0.935528329 |
| TELENCEPHALON REGIONALIZATION                                                                                   | 8   | -0.188841633 | 0.485932182 |
| CELLULAR RESPONSE TO OSMOTIC STRESS                                                                             | 19  | -0.20009196  | 0.260481223 |
| REGULATION OF INTERFERON GAMMA SECRETION                                                                        | 8   | 0.433558543  | 0.11161087  |
| REGULATION OF RESPONSE TO INTERFERON GAMMA                                                                      | 22  | -0.348343492 | 0.029327371 |
| REGULATION OF DENDRITIC SPINE MORPHOGENESIS                                                                     | 26  | -0.300932251 | 0.039996201 |
| CELLULAR COPPER ION HOMEOSTASIS                                                                                 | 11  | 0.031242007  | 0.899890555 |
| RESPONSE TO ACIDIC PH                                                                                           | 15  | -0.124606533 | 0.540377449 |
| REGULATION OF RENAL SYSTEM PROCESS                                                                              | 30  | 0.025679426  | 0.864312133 |
| NEGATIVE REGULATION OF IMMUNE SYSTEM PROCESS                                                                    | 323 | -0.045654587 | 0.316115823 |
| PERIPHERAL NERVOUS SYSTEM DEVELOPMENT                                                                           | 59  | -0.010465683 | 0.921689523 |
| CARDIAC CHAMBER FORMATION                                                                                       | 10  | 0.047305921  | 0.8561579   |
| PLACENTA DEVELOPMENT                                                                                            | 128 | 0.202728533  | 0.006437185 |
| POSITIVE REGULATION OF JUN KINASE ACTIVITY                                                                      | 57  | -0.075234086 | 0.480159526 |
| POSITIVE REGULATION OF ALPHA BETA T CELL DIFFERENTIATION                                                        | 32  | 0.070377657  | 0.631247266 |
| LENS MORPHOGENESIS IN CAMERA TYPE EYE                                                                           | 16  | -0.251866618 | 0.17680909  |
| ERAD PATHWAY                                                                                                    | 71  | -0.181860272 | 0.049971618 |
| MYELIN MAINTENANCE                                                                                              | 12  | 0.039216771  | 0.869137587 |
| CELL CELL JUNCTION ASSEMBLY                                                                                     | 64  | -0.210370806 | 0.028838683 |
| LIPID STORAGE                                                                                                   | 26  | 0.102519559  | 0.529528124 |
| MEMBRANE LIPID METABOLIC PROCESS                                                                                | 162 | -0.055685775 | 0.382400223 |
| REGULATION OF EXTENT OF CELL GROWTH                                                                             | 99  | 0.135156764  | 0.108517841 |
| ACTIN FILAMENT ORGANIZATION                                                                                     | 146 | -0.051598586 | 0.442666351 |
| REGULATION OF INTERLEUKIN 8 BIOSYNTHETIC PROCESS                                                                | 9   | 0.391350574  | 0.130641432 |
| CELL VOLUME HOMEOSTASIS                                                                                         | 19  | -0.160563725 | 0.369475089 |
| REGULATION OF RELEASE OF SEQUESTERED CALCIUM ION INTO CYTOSOL                                                   | 63  | -0.266852874 | 0.004879552 |
| GMP METABOLIC PROCESS                                                                                           | 20  | -0.03090411  | 0.864953137 |
| RENAL ABSORPTION                                                                                                | 9   | -0.19473471  | 0.450917322 |
| REGULATION OF ENDOTHELIAL CELL CHEMOTAXIS                                                                       | 15  | 0.264160329  | 0.217473267 |
| POSITIVE REGULATION OF MITOCHONDRIAL OUTER MEMBRANE<br>PERMEABILIZATION INVOLVED IN APOPTOTIC SIGNALING PATHWAY | 35  | -0.046679597 | 0.733112884 |
| EPITHELIAL STRUCTURE MAINTENANCE                                                                                | 19  | 0.168796627  | 0.381954229 |
| PEPTIDYL LYSINE TRIMETHYLATION                                                                                  | 23  | -0.163059722 | 0.317786208 |
| PROTEIN REFOLDING                                                                                               | 19  | -0.120369068 | 0.507742472 |
| RRNA CATABOLIC PROCESS                                                                                          | 15  | -0.001434799 | 0.994580945 |
| NEGATIVE REGULATION OF ENDOTHELIAL CELL MIGRATION                                                               | 35  | -0.11927682  | 0.372597543 |
| REGULATION OF LEUKOCYTE DEGRANULATION                                                                           | 36  | -0.192139644 | 0.135796345 |
| UNSATURATED FATTY ACID METABOLIC PROCESS                                                                        | 76  | 0.029091481  | 0.758477031 |
| RESPONSE TO SALT                                                                                                | 14  | 0.072159119  | 0.744539524 |
| REGULATION OF CYTOPLASMIC TRANSLATION                                                                           | 12  | 0.310090797  | 0.202087613 |
| RESPONSE TO FUNGUS                                                                                              | 36  | 0.044394389  | 0.747044501 |
| ENDOCHONDRAL BONE MORPHOGENESIS                                                                                 | 38  | -0.151612755 | 0.232251044 |
| DETECTION OF TEMPERATURE STIMULUS INVOLVED IN SENSORY PERCEPTION                                                | 9   | 0.553686547  | 0.02036236  |
| GENERATION OF PRECURSOR METABOLITES AND ENERGY                                                                  | 256 | -0.077760086 | 0.124498108 |
| POSITIVE REGULATION OF ENDOTHELIAL CELL APOPTOTIC PROCESS                                                       | 12  | -0.272671518 | 0.20458258  |
| SULFUR AMINO ACID METABOLIC PROCESS                                                                             | 36  | -0.14549157  | 0.265704931 |
| RESPONSE TO OXYGEN RADICAL                                                                                      | 13  | -0.292347044 | 0.145564007 |

|                                                                |      |              |             |
|----------------------------------------------------------------|------|--------------|-------------|
| ACTIVATION OF CYSTEINE TYPE ENDOPEPTIDASE ACTIVITY INVOLVED IN | 13   | -0.201371628 | 0.343650417 |
| APOPTOTIC SIGNALING PATHWAY                                    |      |              |             |
| POSITIVE REGULATION OF T CELL APOPTOTIC PROCESS                | 12   | -0.170819272 | 0.445120081 |
| REGULATION OF HORMONE METABOLIC PROCESS                        | 20   | 0.228866169  | 0.217936492 |
| PROTEIN ACYLATION                                              | 146  | 0.008518779  | 0.900526006 |
| CRANIOFACIAL SUTURE MORPHOGENESIS                              | 12   | -0.14969994  | 0.508031752 |
| REGULATION OF LIPID CATABOLIC PROCESS                          | 44   | 0.299317997  | 0.015432288 |
| KIDNEY MORPHOGENESIS                                           | 70   | 0.098772604  | 0.321311579 |
| LOCALIZATION WITHIN MEMBRANE                                   | 112  | -0.127934119 | 0.088109861 |
| CYTOKINESIS                                                    | 77   | -0.003470106 | 0.970360181 |
| REGULATION OF PROTEIN EXIT FROM ENDOPLASMIC RETICULUM          | 16   | -0.255321946 | 0.189383485 |
| HEME BIOSYNTHETIC PROCESS                                      | 19   | -0.409306523 | 0.011592295 |
| NEURON PROJECTION GUIDANCE                                     | 176  | 0.138340435  | 0.028802939 |
| POSITIVE REGULATION OF MEMBRANE PROTEIN ECTODOMAIN PROTEOLYSIS | 13   | 0.085269031  | 0.710733925 |
| CHONDROITIN SULFATE PROTEOGLYCAN METABOLIC PROCESS             | 40   | 0.059721244  | 0.648391118 |
| EPITHELIAL CELL DIFFERENTIATION INVOLVED IN PROSTATE GLAND     |      |              |             |
| DEVELOPMENT                                                    | 10   | 0.358855905  | 0.171372343 |
| PROTEIN PALMITOYLATION                                         | 21   | -0.235805242 | 0.151804317 |
| DORSAL VENTRAL AXIS SPECIFICATION                              | 18   | 0.252999757  | 0.194042724 |
| PROTEIN CHROMOPHORE LINKAGE                                    | 6    | -0.096032682 | 0.767588876 |
| REGULATION OF P38MAPK CASCADE                                  | 22   | 0.157627586  | 0.375293181 |
| FEEDING BEHAVIOR                                               | 66   | 0.125701671  | 0.220199592 |
| REGULATION OF PROTEIN SERINE THREONINE KINASE ACTIVITY         | 427  | -0.101104306 | 0.009982845 |
| REGULATION OF INTERLEUKIN 1 SECRETION                          | 25   | 0.076971341  | 0.642423556 |
| REGULATION OF TRANSPORT                                        | 1500 | -0.004074454 | 0.854635745 |
| ESTABLISHMENT OR MAINTENANCE OF BIPOLAR CELL POLARITY          | 34   | 0.058079112  | 0.682757105 |
| FOREBRAIN NEURON FATE COMMITMENT                               | 9    | 0.499506359  | 0.043636832 |
| SULFUR AMINO ACID BIOSYNTHETIC PROCESS                         | 18   | -0.004381114 | 0.981865241 |
| CELLULAR RESPONSE TO VITAMIN                                   | 25   | 0.058429314  | 0.724070465 |
| PEPTIDE HORMONE PROCESSING                                     | 25   | 0.064827548  | 0.695391281 |
| CELLULAR RESPONSE TO VITAMIN D                                 | 14   | -0.149648672 | 0.474158628 |
| NEGATIVE REGULATION OF IMMUNE RESPONSE                         | 101  | -0.177651248 | 0.021907287 |
| REGULATION OF RESPONSE TO OXIDATIVE STRESS                     | 59   | -0.008270826 | 0.938106104 |
| POSITIVE REGULATION OF PROTEIN EXPORT FROM NUCLEUS             | 19   | -0.348445275 | 0.034152447 |
| GTP METABOLIC PROCESS                                          | 20   | -0.246878429 | 0.143649961 |
| PROTEIN K48 LINKED UBIQUITINATION                              | 46   | -0.211334342 | 0.063357713 |
| MACROMITOPHAGY                                                 | 113  | -0.117832451 | 0.115294514 |
| NUCLEOTIDE EXCISION REPAIR DNA DUPLEX UNWINDING                | 22   | 0.501326571  | 0.002239528 |
| T CELL MEDIATED IMMUNITY                                       | 24   | 0.032606568  | 0.84628132  |
| DNA DAMAGE RESPONSE DETECTION OF DNA DAMAGE                    | 36   | 0.131313601  | 0.350715717 |
| MITOCHONDRION LOCALIZATION                                     | 33   | -0.142682754 | 0.298375052 |
| MATURATION OF 5 8S RRNA                                        | 28   | -0.126177793 | 0.397536463 |
| REGULATION OF POTASSIUM ION TRANSMEMBRANE TRANSPORT            | 47   | -0.013046123 | 0.912823109 |
| ASPARTATE METABOLIC PROCESS                                    | 9    | -0.329325265 | 0.177095117 |
| REGULATION OF DENDRITE EXTENSION                               | 17   | -0.027402528 | 0.889532302 |
| MECHANOSENSORY BEHAVIOR                                        | 9    | -0.391259205 | 0.104589735 |
| BONE RESORPTION                                                | 18   | -0.176124207 | 0.338589552 |
| AXONEME ASSEMBLY                                               | 32   | 0.321808387  | 0.025291453 |
| REGULATION OF IMMUNE EFFECTOR PROCESS                          | 358  | -0.047956747 | 0.267894639 |
| GANGLION DEVELOPMENT                                           | 12   | -0.04121732  | 0.860133437 |
| REGULATION OF SECONDARY METABOLIC PROCESS                      | 9    | -0.136458231 | 0.601530713 |
| REGULATION OF NUCLEOTIDE METABOLIC PROCESS                     | 165  | 0.029352841  | 0.64856902  |
| CALCIUM ION TRANSMEMBRANE TRANSPORT                            | 129  | 0.024468005  | 0.736417703 |
| HOMOPHILIC CELL ADHESION VIA PLASMA MEMBRANE ADHESION          |      |              |             |
| MOLECULES                                                      | 116  | 0.038519258  | 0.616021851 |
| DEVELOPMENTAL GROWTH INVOLVED IN MORPHOGENESIS                 | 93   | 0.012402916  | 0.88440535  |
| CARDIAC SEPTUM MORPHOGENESIS                                   | 44   | 0.177144656  | 0.158903777 |
| REGULATION OF TRANSCRIPTION INVOLVED IN CELL FATE COMMITMENT   | 13   | 0.13425152   | 0.562990693 |
| CENTRAL NERVOUS SYSTEM NEURON DEVELOPMENT                      | 61   | 0.117826195  | 0.270770567 |
| POSITIVE REGULATION OF T CELL MEDIATED IMMUNITY                | 28   | -0.133992807 | 0.36799855  |
| EXOCYTOSIS                                                     | 261  | -0.059779326 | 0.23524301  |
| REGULATION OF HISTONE H4 ACETYLATION                           | 11   | 0.008834292  | 0.971491196 |
| POSITIVE REGULATION OF LIPID STORAGE                           | 16   | -0.179549123 | 0.356630657 |
| PYRIMIDINE NUCLEOSIDE METABOLIC PROCESS                        | 43   | -0.170708002 | 0.15142447  |
| REGULATION OF SISTER CHROMATID COHESION                        | 17   | -0.336436454 | 0.056764758 |
| HEPARAN SULFATE PROTEOGLYCAN BIOSYNTHETIC PROCESS              | 19   | 0.087829481  | 0.644952061 |

|                                                                  |     |              |             |
|------------------------------------------------------------------|-----|--------------|-------------|
| REGULATION OF CARDIAC MUSCLE CONTRACTION                         | 59  | -0.141740923 | 0.166609782 |
| ZINC ION HOMEOSTASIS                                             | 18  | 0.259838637  | 0.181343848 |
| POSITIVE REGULATION OF I KAPPAB KINASE NF KAPPAB SIGNALING       | 167 | -0.114329631 | 0.064185706 |
| EYE PHOTORECEPTOR CELL DEVELOPMENT                               | 26  | -0.038053283 | 0.810969499 |
| NEGATIVE REGULATION OF OSTEOBLAST DIFFERENTIATION                | 38  | 0.110145827  | 0.414204617 |
| REGULATION OF VIRAL INDUCED CYTOPLASMIC PATTERN RECOGNITION      | 12  | -0.255002621 | 0.238668546 |
| RECEPTOR SIGNALING PATHWAY                                       | 228 | -0.074454263 | 0.165147123 |
| GLYCOSYLATION                                                    | 13  | -0.465557529 | 0.025783653 |
| ANGIOGENESIS INVOLVED IN WOUND HEALING                           | 18  | -0.201963296 | 0.266995035 |
| REGULATION OF RECEPTOR RECYCLING                                 | 46  | 0.066427399  | 0.587251084 |
| REGULATION OF INTERLEUKIN 2 PRODUCTION                           | 199 | 0.001303711  | 0.982186762 |
| REGULATION OF PROTEIN COMPLEX DISASSEMBLY                        | 77  | -0.054262815 | 0.556444564 |
| NEGATIVE REGULATION OF MYELOID CELL DIFFERENTIATION              | 21  | 0.097258218  | 0.59248419  |
| POSITIVE REGULATION OF SMOOTHENED SIGNALING PATHWAY              | 9   | -0.027014039 | 0.920600532 |
| NEUTROPHIL ACTIVATION INVOLVED IN IMMUNE RESPONSE                | 51  | -0.008268756 | 0.942446077 |
| POSITIVE REGULATION OF EXTRINSIC APOPTOTIC SIGNALING PATHWAY     | 168 | 0.014488381  | 0.819955356 |
| REGULATION OF MUSCLE SYSTEM PROCESS                              | 11  | 0.232970366  | 0.345803784 |
| ARACHIDONATE TRANSPORT                                           | 38  | 0.217341179  | 0.106222913 |
| LONG CHAIN FATTY ACID TRANSPORT                                  | 22  | 0.12885276   | 0.46878793  |
| ACTIN NUCLEATION                                                 | 141 | -0.187300331 | 0.004335444 |
| CHROMATIN REMODELING                                             | 32  | -0.083877385 | 0.55393723  |
| IMPORT INTO CELL                                                 | 14  | 0.094291884  | 0.671125074 |
| CALCIUM INDEPENDENT CELL CELL ADHESION VIA PLASMA MEMBRANE CELL  | 26  | -0.116763452 | 0.454023359 |
| ADHESION MOLECULES                                               | 12  | 0.100235329  | 0.676847387 |
| PHOSPHOLIPID CATABOLIC PROCESS                                   | 15  | -0.286561811 | 0.14364553  |
| REGULATION OF EXTRACELLULAR MATRIX DISASSEMBLY                   | 10  | 0.547366592  | 0.026500098 |
| REGULATION OF PRI MIRNA TRANSCRIPTION FROM RNA POLYMERASE II     | 137 | -0.048775665 | 0.482191555 |
| PROMOTER                                                         | 18  | 0.180483683  | 0.360074334 |
| COLLECTING DUCT DEVELOPMENT                                      | 127 | -0.103466691 | 0.145299432 |
| HEXOSE METABOLIC PROCESS                                         | 78  | 0.058303573  | 0.534442146 |
| REGULATION OF TRIGLYCERIDE BIOSYNTHETIC PROCESS                  | 51  | -0.009034925 | 0.937112991 |
| REGULATION OF RESPONSE TO CYTOKINE STIMULUS                      | 350 | -0.075060368 | 0.08411161  |
| NEUROMUSCULAR PROCESS                                            | 14  | -0.039644347 | 0.854781975 |
| ACTIN CYTOSKELETON REORGANIZATION                                | 218 | 0.204888601  | 0.000332368 |
| PURINE CONTAINING COMPOUND METABOLIC PROCESS                     | 11  | 0.051650755  | 0.835984139 |
| NEGATIVE REGULATION OF CD4 POSITIVE ALPHA BETA T CELL ACTIVATION | 339 | -0.025863114 | 0.562754809 |
| LIPID LOCALIZATION                                               | 12  | 0.14040804   | 0.55768265  |
| HETEROCHROMATIN ORGANIZATION                                     | 17  | 0.034719654  | 0.862087916 |
| GLAND DEVELOPMENT                                                | 41  | -0.096374274 | 0.439365761 |
| RESPONSE TO MERCURY ION                                          | 246 | -0.007451574 | 0.887136328 |
| REGULATION OF UBIQUITIN PROTEIN LIGASE ACTIVITY                  | 511 | -0.058791904 | 0.105756436 |
| BETA CATENIN TCF COMPLEX ASSEMBLY                                | 125 | -0.01104706  | 0.880196475 |
| ACTIVATION OF PROTEIN KINASE ACTIVITY                            | 251 | -0.05579414  | 0.277742511 |
| REGULATION OF CELL CYCLE PROCESS                                 | 52  | -0.063128288 | 0.572536432 |
| ESTABLISHMENT OR MAINTENANCE OF CELL POLARITY                    | 49  | 0.12572315   | 0.292211847 |
| IMMUNE RESPONSE REGULATING CELL SURFACE RECEPTOR SIGNALING       | 16  | -0.26882275  | 0.144860419 |
| PATHWAY                                                          | 43  | 0.187959576  | 0.138702195 |
| VESICLE DOCKING                                                  | 184 | -0.118508318 | 0.044301298 |
| OLIGODENDROCYTE DIFFERENTIATION                                  | 13  | 0.15012965   | 0.51746711  |
| NEUROMUSCULAR SYNAPTIC TRANSMISSION                              | 16  | 0.040393401  | 0.844703826 |
| CELL KILLING                                                     | 110 | -0.006597559 | 0.932738026 |
| CELL CYCLE CHECKPOINT                                            | 28  | -0.128242572 | 0.391618388 |
| NEPHRON TUBULE FORMATION                                         | 18  | 0.006315692  | 0.973920349 |
| NEGATIVE REGULATION OF CARDIAC MUSCLE TISSUE DEVELOPMENT         | 39  | -0.017116104 | 0.895774772 |
| NEGATIVE REGULATION OF ION TRANSPORT                             | 604 | -0.030867172 | 0.360476558 |
| CEREBRAL CORTEX RADIALY ORIENTED CELL MIGRATION                  | 54  | -0.041751109 | 0.705340796 |
| LYMPH VESSEL DEVELOPMENT                                         | 17  | -0.325613871 | 0.063454401 |
| RESPONSE TO CADMIUM ION                                          | 51  | -0.159231114 | 0.146732533 |
| RESPONSE TO CYTOKINE                                             | 22  | -0.093333202 | 0.583852789 |
| REGULATION OF CARDIAC CONDUCTION                                 | 727 | 0.021913769  | 0.482835342 |
| POSITIVE REGULATION OF EXTRINSIC APOPTOTIC SIGNALING PATHWAY VIA | 17  | 0.238594333  | 0.234673204 |
| DEATH DOMAIN RECEPTORS                                           |     |              |             |
| SPLICEOSOMAL COMPLEX ASSEMBLY                                    |     |              |             |
| SNRNA PROCESSING                                                 |     |              |             |
| POSITIVE REGULATION OF CELL DIFFERENTIATION                      |     |              |             |
| ATRIOVENTRICULAR VALVE DEVELOPMENT                               |     |              |             |

|                                                                           |      |              |             |
|---------------------------------------------------------------------------|------|--------------|-------------|
| RRNA MODIFICATION                                                         | 24   | -0.193761159 | 0.227979405 |
| POSITIVE REGULATION OF MONOOXYGENASE ACTIVITY                             | 24   | 0.097875952  | 0.564288895 |
| POSITIVE REGULATION OF DENDRITIC SPINE MORPHOGENESIS                      | 12   | -0.439734269 | 0.035789846 |
| PROSTATE GLAND DEVELOPMENT                                                | 38   | -0.027339788 | 0.835971425 |
| MICROVILLUS ORGANIZATION                                                  | 20   | -0.149684655 | 0.394146105 |
| ADENOHYPHYPHYSIS DEVELOPMENT                                              | 10   | 0.086510501  | 0.741352025 |
| REGULATION OF T HELPER 1 TYPE IMMUNE RESPONSE                             | 16   | 0.136479965  | 0.511966368 |
| REGULATION OF INTERLEUKIN 6 PRODUCTION                                    | 84   | 0.016897068  | 0.850775543 |
| SECONDARY METABOLIC PROCESS                                               | 38   | 0.073544299  | 0.58431198  |
| NEGATIVE REGULATION OF GLUCONEOGENESIS                                    | 10   | 0.039399777  | 0.879921061 |
| REGULATION OF TRANSMISSION OF NERVE IMPULSE                               | 12   | 0.380712576  | 0.09905761  |
| FATTY ACID DERIVATIVE BIOSYNTHETIC PROCESS                                | 31   | -0.005127951 | 0.97215479  |
| GLUTAMATE RECEPTOR SIGNALING PATHWAY                                      | 33   | -0.111413019 | 0.420595122 |
| PYRUVATE METABOLIC PROCESS                                                | 53   | -0.037314959 | 0.738071634 |
| POSITIVE REGULATION OF ERBB SIGNALING PATHWAY                             | 31   | 0.132493603  | 0.381861549 |
| REGULATION OF POTASSIUM ION TRANSMEMBRANE TRANSPORTER ACTIVITY            | 35   | -0.023598154 | 0.86393833  |
| NITRIC OXIDE MEDIATED SIGNAL TRANSDUCTION                                 | 14   | 0.131920105  | 0.554976754 |
| POSITIVE REGULATION OF TYROSINE PHOSPHORYLATION OF STAT5 PROTEIN          | 13   | -0.058595563 | 0.793278924 |
| NEGATIVE REGULATION OF ENDOTHELIAL CELL APOPTOTIC PROCESS                 | 24   | -0.015482111 | 0.925929738 |
| ESTABLISHMENT OF MITOTIC SPINDLE LOCALIZATION                             | 23   | -0.085064412 | 0.610753773 |
| STEROL METABOLIC PROCESS                                                  | 103  | 0.023308447  | 0.774245654 |
| RETINA DEVELOPMENT IN CAMERA TYPE EYE                                     | 109  | -0.022353582 | 0.775111432 |
| REGULATION OF POSTTRANSCRIPTIONAL GENE SILENCING                          | 20   | 0.026270493  | 0.886499775 |
| POST ANAL TAIL MORPHOGENESIS                                              | 15   | 0.091976777  | 0.66747651  |
| PEPTIDYL ASPARAGINE MODIFICATION                                          | 37   | -0.261303126 | 0.036941296 |
| POSITIVE REGULATION OF ENDOTHELIAL CELL PROLIFERATION                     | 63   | -0.047810845 | 0.639475243 |
| CYTOLYSIS                                                                 | 15   | 0.224734978  | 0.292178419 |
| REGULATION OF VIRAL GENOME REPLICATION                                    | 69   | -0.041075641 | 0.674420371 |
| MAMMARY GLAND EPITHELIAL CELL PROLIFERATION                               | 12   | -0.337383393 | 0.101137708 |
| REPRODUCTION                                                              | 1020 | 0.070056458  | 0.009095425 |
| REGULATION OF STAT CASCADE                                                | 113  | -0.027286573 | 0.722264107 |
| REGULATION OF ION TRANSPORT                                               | 472  | 0.058595615  | 0.129688165 |
| DORSAL SPINAL CORD DEVELOPMENT                                            | 11   | -0.066479883 | 0.784365082 |
| NEURON DEATH                                                              | 44   | -0.172531498 | 0.143076453 |
| POSITIVE REGULATION OF AUTOPHAGY                                          | 71   | -0.073859996 | 0.439489879 |
| SIGNAL TRANSDUCTION BY PROTEIN PHOSPHORYLATION                            | 354  | 0.014945476  | 0.734855063 |
| RECEPTOR MEDIATED ENDOCYTOSIS                                             | 176  | 0.188106017  | 0.003012114 |
| POSITIVE REGULATION OF ACTIN FILAMENT BUNDLE ASSEMBLY                     | 44   | -0.049024227 | 0.687861441 |
| 2 OXOGLUTARATE METABOLIC PROCESS                                          | 17   | -0.184174206 | 0.325102726 |
| TRYPTOPHAN METABOLIC PROCESS                                              | 11   | 0.358489395  | 0.1336807   |
| INOSITOL PHOSPHATE MEDIATED SIGNALING                                     | 15   | -0.021767749 | 0.917544382 |
| REGULATION OF MEMBRANE PERMEABILITY                                       | 69   | -0.124323983 | 0.192434886 |
| ANDROGEN RECEPTOR SIGNALING PATHWAY                                       | 38   | 0.088511328  | 0.512802183 |
| NEGATIVE REGULATION OF DNA TEMPLATED TRANSCRIPTION ELONGATION             | 12   | 0.007623369  | 0.974298714 |
| POSITIVE REGULATION OF STEM CELL PROLIFERATION                            | 51   | -0.09605616  | 0.390704919 |
| GERM CELL DEVELOPMENT                                                     | 158  | 0.082500852  | 0.213690537 |
| NEGATIVE REGULATION OF RECEPTOR MEDIATED ENDOCYTOSIS                      | 14   | -0.336728362 | 0.083210996 |
| DNA LIGATION                                                              | 16   | 0.233394402  | 0.266298701 |
| REGULATION OF SPROUTING ANGIOGENESIS                                      | 28   | 0.03898551   | 0.80256678  |
| CELLULAR MACROMOLECULE LOCALIZATION                                       | 1126 | -0.055309929 | 0.027451551 |
| REGULATION OF CELLULAR RESPONSE TO INSULIN STIMULUS                       | 51   | -0.071504675 | 0.525810911 |
| NEPHRON DEVELOPMENT                                                       | 97   | -0.036994524 | 0.654305848 |
| POSITIVE REGULATION OF RESPONSE TO DNA DAMAGE STIMULUS                    | 61   | 0.043091346  | 0.683931538 |
| PURINE CONTAINING COMPOUND CATABOLIC PROCESS                              | 46   | 0.0694531    | 0.570132826 |
| REGULATION OF LIPOPROTEIN PARTICLE CLEARANCE                              | 10   | -0.072719562 | 0.774347245 |
| PLATELET DEGRANULATION                                                    | 91   | -0.072648153 | 0.389650005 |
| POSITIVE REGULATION OF INFLAMMATORY RESPONSE                              | 88   | 0.123364668  | 0.165248597 |
| LIPID OXIDATION                                                           | 61   | 0.137992203  | 0.195860049 |
| INTEGRIN MEDIATED SIGNALING PATHWAY                                       | 73   | -0.063889922 | 0.498861614 |
| NOTOCHORD DEVELOPMENT                                                     | 15   | -0.24057194  | 0.213948795 |
| DICARBOXYLIC ACID CATABOLIC PROCESS                                       | 13   | -0.115591912 | 0.598843322 |
| NAD BIOSYNTHETIC PROCESS                                                  | 12   | -0.33711     | 0.114037175 |
| REGULATION OF SULFUR METABOLIC PROCESS                                    | 20   | -0.433756669 | 0.003633043 |
| SKIN DEVELOPMENT                                                          | 167  | 0.125852433  | 0.052641461 |
| ADENYLATE CYCLASE ACTIVATING G PROTEIN COUPLED RECEPTOR SIGNALING PATHWAY | 46   | 0.153621863  | 0.212250498 |

|                                                                                                                         |      |              |             |
|-------------------------------------------------------------------------------------------------------------------------|------|--------------|-------------|
| MESODERM DEVELOPMENT                                                                                                    | 99   | 0.040539712  | 0.625842242 |
| GENITALIA DEVELOPMENT                                                                                                   | 34   | 0.105309285  | 0.460502733 |
| NEGATIVE REGULATION OF CALCIUM MEDIATED SIGNALING                                                                       | 18   | 0.026987009  | 0.889346392 |
| REGULATION OF TYROSINE PHOSPHORYLATION OF STAT1 PROTEIN                                                                 | 15   | 0.247583736  | 0.256335691 |
| CELLULAR RESPONSE TO STRESS                                                                                             | 1420 | -0.050773462 | 0.024704071 |
| PATTERN SPECIFICATION PROCESS                                                                                           | 352  | 0.009249999  | 0.834237808 |
| REGULATION OF ALCOHOL BIOSYNTHETIC PROCESS                                                                              | 40   | 0.231657437  | 0.077740179 |
| PHOSPHATIDIC ACID METABOLIC PROCESS                                                                                     | 27   | 0.155325168  | 0.334945276 |
| NEGATIVE REGULATION OF VIRAL GENOME REPLICATION                                                                         | 43   | -0.122497381 | 0.310623932 |
| ANGIOGENESIS                                                                                                            | 266  | 0.029706755  | 0.559486818 |
| EPITHELIAL CELL DIFFERENTIATION                                                                                         | 405  | 0.056460209  | 0.17518743  |
| REGULATION OF NATURAL KILLER CELL MEDIATED IMMUNITY                                                                     | 27   | -0.163831874 | 0.274271557 |
| LYMPHOID PROGENITOR CELL DIFFERENTIATION                                                                                | 11   | 0.296068893  | 0.240897546 |
| METHYLATION                                                                                                             | 244  | -0.039485329 | 0.450514904 |
| CELL SURFACE RECEPTOR SIGNALING PATHWAY INVOLVED IN HEART DEVELOPMENT                                                   | 16   | 0.326056468  | 0.109102733 |
| PROTEIN IMPORT INTO MITOCHONDRIAL MATRIX                                                                                | 12   | -0.131528867 | 0.562327014 |
| MODULATION OF SYNAPTIC TRANSMISSION                                                                                     | 244  | 0.083148323  | 0.120575682 |
| CELLULAR RESPONSE TO REACTIVE NITROGEN SPECIES                                                                          | 16   | -0.121159727 | 0.540569055 |
| POSITIVE REGULATION OF VASCULAR ENDOTHELIAL GROWTH FACTOR RECEPTOR SIGNALING PATHWAY                                    | 16   | -0.030220713 | 0.881752278 |
| REGULATION OF CATECHOLAMINE METABOLIC PROCESS                                                                           | 14   | -0.062611746 | 0.771101434 |
| MELANOCYTE DIFFERENTIATION                                                                                              | 17   | 0.236699069  | 0.237016536 |
| RNA CATABOLIC PROCESS                                                                                                   | 221  | -0.12468715  | 0.020238963 |
| DNA DOUBLE STRAND BREAK PROCESSING                                                                                      | 19   | -0.00493124  | 0.979027546 |
| ESTABLISHMENT OF MITOCHONDRION LOCALIZATION                                                                             | 17   | -0.159471285 | 0.40326607  |
| UBIQUITIN DEPENDENT PROTEIN CATABOLIC PROCESS VIA THE MULTIVESICULAR BODY SORTING PATHWAY                               | 17   | 0.247135702  | 0.231019096 |
| FATTY ACID TRANSPORT                                                                                                    | 51   | 0.178051398  | 0.127425198 |
| VENTRICULAR TRABECULA MYOCARDIUM MORPHOGENESIS                                                                          | 10   | -0.090879462 | 0.719683753 |
| REGULATION OF CELL SHAPE                                                                                                | 125  | 0.024378221  | 0.741277145 |
| ARACHIDONIC ACID METABOLIC PROCESS                                                                                      | 33   | 0.092276934  | 0.523271547 |
| RESPONSE TO ETHER                                                                                                       | 9    | 0.221290407  | 0.426615304 |
| POSITIVE REGULATION OF TRANSCRIPTION FROM RNA POLYMERASE II PROMOTER INVOLVED IN CELLULAR RESPONSE TO CHEMICAL STIMULUS | 26   | -0.024242852 | 0.879322861 |
| POSITIVE REGULATION OF LAMELLIPODIUM ORGANIZATION                                                                       | 23   | 0.055737614  | 0.746806689 |
| REGULATION OF BLOOD VOLUME BY RENIN ANGIOTENSIN                                                                         | 8    | 0.360499916  | 0.19300868  |
| RESPONSE TO NUTRIENT                                                                                                    | 170  | 0.05789803   | 0.36395196  |
| ORGANELLE LOCALIZATION                                                                                                  | 377  | -0.050218197 | 0.234014919 |
| VENOUS BLOOD VESSEL DEVELOPMENT                                                                                         | 14   | -0.095664914 | 0.654306161 |
| EXECUTION PHASE OF APOPTOSIS                                                                                            | 51   | -0.053755382 | 0.635037635 |
| CELL DEVELOPMENT                                                                                                        | 1210 | 0.052346409  | 0.034438546 |
| PRODUCTION OF MOLECULAR MEDIATOR OF IMMUNE RESPONSE                                                                     | 52   | -0.026229463 | 0.816387281 |
| TELENCEPHALON DEVELOPMENT                                                                                               | 198  | 0.05064527   | 0.391476504 |
| PROSTANOID METABOLIC PROCESS                                                                                            | 24   | -0.122945783 | 0.445505993 |
| MEMBRANE REPOLARIZATION                                                                                                 | 12   | -0.224334299 | 0.31236636  |
| CEREBELLAR PURKINJE CELL LAYER MORPHOGENESIS                                                                            | 12   | -0.206532773 | 0.353072523 |
| CLATHRIN MEDIATED ENDOCYTOSIS                                                                                           | 35   | 0.181009182  | 0.198985433 |
| PHOSPHATIDYLETHANOLAMINE ACYL CHAIN REMODELING                                                                          | 16   | 0.188041234  | 0.365479428 |
| RESPONSE TO GONADOTROPIN                                                                                                | 23   | 0.289079437  | 0.098481869 |
| CAMERA TYPE EYE MORPHOGENESIS                                                                                           | 83   | -0.027453015 | 0.758981588 |
| RESPONSE TO COBALT ION                                                                                                  | 13   | 0.031160764  | 0.891499723 |
| NEUROTROPHIN TRK RECEPTOR SIGNALING PATHWAY                                                                             | 13   | -0.50012554  | 0.007077208 |
| MATERNAL PLACENTA DEVELOPMENT                                                                                           | 29   | 0.065546661  | 0.670430084 |
| MACROMOLECULE METHYLATION                                                                                               | 179  | -0.020240855 | 0.740988975 |
| STRESS ACTIVATED PROTEIN KINASE SIGNALING CASCADE                                                                       | 89   | 0.047444923  | 0.588798082 |
| REGULATION OF PLATELET DERIVED GROWTH FACTOR RECEPTOR SIGNALING PATHWAY                                                 | 14   | -0.282080998 | 0.156756383 |
| POSITIVE REGULATION OF SMALL GTPASE MEDIATED SIGNAL TRANSDUCTION                                                        | 34   | 0.222383053  | 0.12516132  |
| CHROMATIN SILENCING AT RDNA                                                                                             | 35   | 0.066695285  | 0.633801102 |
| RESPONSE TO FOLIC ACID                                                                                                  | 12   | 0.181412181  | 0.448901447 |
| GROWTH PLATE CARTILAGE DEVELOPMENT                                                                                      | 9    | 0.209153921  | 0.447202953 |
| O GLYCAN PROCESSING                                                                                                     | 49   | 0.004562722  | 0.968936168 |
| POSITIVE REGULATION OF CYCLIC NUCLEOTIDE METABOLIC PROCESS                                                              | 77   | 0.11010454   | 0.246299923 |
| REACTIVE OXYGEN SPECIES METABOLIC PROCESS                                                                               | 74   | -0.017568649 | 0.853210766 |
| REGULATION OF AUTOPHAGOSOME ASSEMBLY                                                                                    | 32   | 0.163482929  | 0.268735152 |

|                                                                                                 |      |              |             |
|-------------------------------------------------------------------------------------------------|------|--------------|-------------|
| NEUTRAL AMINO ACID TRANSPORT                                                                    | 25   | -0.000966953 | 0.995287245 |
| POSITIVE REGULATION OF MULTI ORGANISM PROCESS                                                   | 144  | 0.090831507  | 0.19195678  |
| MESENCHYME MORPHOGENESIS                                                                        | 36   | 0.231722432  | 0.092205086 |
| CENTROSOME DUPLICATION                                                                          | 28   | -0.173981973 | 0.234337999 |
| REGULATION OF BINDING                                                                           | 264  | 0.052499515  | 0.306201779 |
| POSITIVE REGULATION OF IMMUNE RESPONSE                                                          | 443  | -0.017550459 | 0.655208005 |
| POSITIVE REGULATION OF CHEMOTAXIS                                                               | 112  | -0.062624336 | 0.412484879 |
| REGULATION OF RHO PROTEIN SIGNAL TRANSDUCTION                                                   | 94   | -0.144041491 | 0.07637985  |
| NEGATIVE REGULATION OF REACTIVE OXYGEN SPECIES BIOSYNTHETIC PROCESS                             | 14   | 0.274147469  | 0.207684256 |
| REGULATION OF ARF PROTEIN SIGNAL TRANSDUCTION                                                   | 15   | -0.187068597 | 0.354237828 |
| PROTEIN AUTOPHOSPHORYLATION                                                                     | 175  | -0.003757381 | 0.951790984 |
| CELLULAR COMPONENT DISASSEMBLY                                                                  | 455  | -0.14923942  | 7.00E-05    |
| REGULATION OF GLIOGENESIS                                                                       | 80   | -0.016476062 | 0.856897643 |
| AMINOGLYCAN CATABOLIC PROCESS                                                                   | 56   | -0.00317401  | 0.976863071 |
| POSITIVE REGULATION OF ORGANIC ACID TRANSPORT                                                   | 25   | 0.172567334  | 0.29823863  |
| MUSCLE CELL DIFFERENTIATION                                                                     | 205  | 0.006117473  | 0.915417614 |
| ACTIVATION OF TRANSMEMBRANE RECEPTOR PROTEIN TYROSINE KINASE ACTIVITY                           | 9    | 0.448055317  | 0.129884667 |
| PHOSPHATIDYLCHOLINE ACYL CHAIN REMODELING                                                       | 18   | 0.223547521  | 0.254480716 |
| RNA LOCALIZATION                                                                                | 172  | -0.250213123 | 2.16E-05    |
| MULTI ORGANISM MEMBRANE ORGANIZATION                                                            | 30   | 0.208360061  | 0.174957148 |
| POSITIVE REGULATION OF EMBRYONIC DEVELOPMENT                                                    | 29   | -0.017287502 | 0.909129555 |
| HISTONE H4 ACETYLATION                                                                          | 47   | 0.214564351  | 0.080637538 |
| MATING BEHAVIOR                                                                                 | 19   | 0.248319045  | 0.190753332 |
| RIBOSOMAL LARGE SUBUNIT BIOGENESIS                                                              | 49   | -0.052124914 | 0.652002458 |
| REGULATION OF PROTEIN POLYUBIQUITINATION                                                        | 13   | 0.094878529  | 0.680069234 |
| INACTIVATION OF MAPK ACTIVITY                                                                   | 26   | -0.270624758 | 0.069513135 |
| PEPTIDYL ARGININE METHYLATION                                                                   | 11   | -0.088819291 | 0.712211119 |
| NEGATIVE REGULATION OF OXIDATIVE STRESS INDUCED INTRINSIC APOPTOTIC SIGNALING PATHWAY           | 19   | -0.004126497 | 0.982452568 |
| HISTONE PHOSPHORYLATION                                                                         | 23   | -0.541443795 | 8.48E-05    |
| POSITIVE REGULATION OF TRANSMEMBRANE RECEPTOR PROTEIN SERINE THREONINE KINASE SIGNALING PATHWAY | 85   | 0.077865134  | 0.388344885 |
| MULTICELLULAR ORGANISM REPRODUCTION                                                             | 586  | 0.063587343  | 0.068207025 |
| POSITIVE REGULATION OF INTERFERON GAMMA PRODUCTION                                              | 55   | 0.184388797  | 0.100385975 |
| NEGATIVE REGULATION OF NECROTIC CELL DEATH                                                      | 11   | 0.031700239  | 0.89838278  |
| REGULATION OF ORGANELLE ORGANIZATION                                                            | 1058 | -0.029061743 | 0.26249111  |
| PHOSPHORYLATION                                                                                 | 1073 | -0.001601714 | 0.950693079 |
| REGULATION OF STRIATED MUSCLE CELL APOPTOTIC PROCESS                                            | 19   | 0.132013283  | 0.490177467 |
| STRIATED MUSCLE ADAPTATION                                                                      | 17   | 0.091992246  | 0.647637791 |
| BRANCHING MORPHOGENESIS OF AN EPITHELIAL TUBE                                                   | 119  | 0.01175193   | 0.876260396 |
| REGULATION OF RAS PROTEIN SIGNAL TRANSDUCTION                                                   | 161  | -0.111217265 | 0.077604834 |
| NEGATIVE REGULATION OF CYTOKINE PRODUCTION                                                      | 173  | -0.038083201 | 0.539118227 |
| POSITIVE REGULATION OF DENDRITIC SPINE DEVELOPMENT                                              | 31   | -0.225143103 | 0.103715054 |
| POSITIVE REGULATION OF VIRAL PROCESS                                                            | 92   | 0.125722418  | 0.150538506 |
| PROSTATE GLANDULAR ACINUS DEVELOPMENT                                                           | 10   | 0.01860025   | 0.942916461 |
| REGULATION OF PROTEOLYSIS                                                                       | 613  | -0.0418068   | 0.211159727 |
| ENDOCYTOSIS                                                                                     | 403  | 0.085908789  | 0.040559496 |
| PROTEIN LOCALIZATION TO NUCLEUS                                                                 | 143  | -0.07513027  | 0.266000728 |
| PEPTIDE CATABOLIC PROCESS                                                                       | 23   | -0.006153072 | 0.971206705 |
| REGULATION OF MHC CLASS II BIOSYNTHETIC PROCESS                                                 | 12   | 0.034194676  | 0.885696046 |
| RAC PROTEIN SIGNAL TRANSDUCTION                                                                 | 19   | 0.181303127  | 0.345576494 |
| NEGATIVE REGULATION OF POTASSIUM ION TRANSMEMBRANE TRANSPORT                                    | 17   | -0.081603613 | 0.675267331 |
| REGULATION OF VIRAL ENTRY INTO HOST CELL                                                        | 25   | 0.167620172  | 0.31656967  |
| CELLULAR COMPONENT DISASSEMBLY INVOLVED IN EXECUTION PHASE OF APOPTOSIS                         | 41   | -0.074247589 | 0.554306722 |
| POSITIVE REGULATION OF SECRETION                                                                | 298  | 0.010967442  | 0.819151456 |
| NEGATIVE REGULATION OF WNT SIGNALING PATHWAY                                                    | 176  | 0.050869773  | 0.416572195 |
| POSITIVE REGULATION OF CELL CYCLE                                                               | 299  | -0.013047183 | 0.784231906 |
| REGULATION OF CELLULAR PROTEIN LOCALIZATION                                                     | 501  | -0.08258247  | 0.023638108 |
| POSITIVE REGULATION OF B CELL ACTIVATION                                                        | 61   | -0.023395188 | 0.822672815 |
| NEURONAL ACTION POTENTIAL                                                                       | 19   | 0.181015504  | 0.343075586 |
| REGULATION OF TELOMERE MAINTENANCE VIA TELOMERE LENGTHENING                                     | 46   | -0.04885988  | 0.682511283 |
| RETROGRADE TRANSPORT VESICLE RECYCLING WITHIN GOLGI                                             | 19   | 0.024103032  | 0.898383972 |
| POSITIVE REGULATION OF INTERLEUKIN 10 PRODUCTION                                                | 28   | 0.224464851  | 0.155825655 |

|                                                                 |     |              |             |
|-----------------------------------------------------------------|-----|--------------|-------------|
| PARASYMPATHETIC NERVOUS SYSTEM DEVELOPMENT                      | 15  | 0.021349861  | 0.919877971 |
| BASEMENT MEMBRANE ORGANIZATION                                  | 11  | 0.53936166   | 0.02067561  |
| SOMITE DEVELOPMENT                                              | 67  | 0.092885693  | 0.360868108 |
| NEGATIVE REGULATION OF IMMUNE EFFECTOR PROCESS                  | 90  | -0.067372648 | 0.428262507 |
| NEGATIVE REGULATION OF VIRAL RELEASE FROM HOST CELL             | 15  | 0.126949347  | 0.555152969 |
| SERINE FAMILY AMINO ACID METABOLIC PROCESS                      | 37  | -0.023798636 | 0.858942413 |
| SERTOLI CELL DIFFERENTIATION                                    | 15  | 0.065388084  | 0.759737649 |
| NEGATIVE REGULATION OF CALCIUM ION TRANSMEMBRANE TRANSPORT      | 26  | -0.016314696 | 0.918768212 |
| RNA SPLICING                                                    | 347 | -0.140531027 | 0.001051092 |
| VENTRICULAR CARDIAC MUSCLE CELL DEVELOPMENT                     | 11  | 0.076626507  | 0.75924537  |
| POSITIVE REGULATION OF PROTEIN POLYMERIZATION                   | 79  | 0.096569512  | 0.302984469 |
| REGULATION OF MUSCLE ADAPTATION                                 | 56  | 0.139457033  | 0.212210084 |
| NEGATIVE REGULATION OF RESPONSE TO WOUNDING                     | 129 | 0.101051762  | 0.168909497 |
| OLFACTORY BULB INTERNEURON DEVELOPMENT                          | 11  | 0.187813909  | 0.459019609 |
| NEGATIVE REGULATION OF MULTICELLULAR ORGANISMAL PROCESS         | 836 | 0.013666208  | 0.639595831 |
| FEMALE GENITALIA DEVELOPMENT                                    | 13  | 0.16872513   | 0.465323615 |
| NEUROBLAST PROLIFERATION                                        | 27  | 0.071015708  | 0.656397437 |
| ERYTHROSE 4 PHOSPHATE PHOSPHOENOLPYRUVATE FAMILY AMINO ACID     |     |              |             |
| METABOLIC PROCESS                                               | 10  | 0.104845829  | 0.689391494 |
| MIDGUT DEVELOPMENT                                              | 13  | 0.157161762  | 0.495167871 |
| MITOCHONDRION DISTRIBUTION                                      | 10  | -0.176060887 | 0.473348925 |
| PEPTIDYL METHIONINE MODIFICATION                                | 11  | -0.245825935 | 0.279524762 |
| IMMUNOLOGICAL SYNAPSE FORMATION                                 | 6   | 0.058738911  | 0.861755959 |
| VITAMIN METABOLIC PROCESS                                       | 107 | -0.033679956 | 0.668849012 |
| MUSCLE CELL DEVELOPMENT                                         | 107 | -0.054327661 | 0.48801022  |
| REGULATION OF DEFENSE RESPONSE TO VIRUS BY HOST                 | 119 | -0.105567052 | 0.149419278 |
| REGULATION OF NEURAL PRECURSOR CELL PROLIFERATION               | 60  | -0.097971529 | 0.341972883 |
| NUCLEOTIDE SUGAR BIOSYNTHETIC PROCESS                           | 18  | 0.337078203  | 0.081034401 |
| NEGATIVE REGULATION OF AXONOGENESIS                             | 59  | 0.018092187  | 0.865862671 |
| LEUKOCYTE MIGRATION INVOLVED IN INFLAMMATORY RESPONSE           | 10  | 0.121522517  | 0.643061799 |
| OSTEOCLAST DIFFERENTIATION                                      | 26  | -0.004127429 | 0.979473952 |
| CARBOHYDRATE DERIVATIVE TRANSPORT                               | 46  | 0.024462525  | 0.840308873 |
| DEFINITIVE HEMOPOIESIS                                          | 15  | 0.170116951  | 0.431390223 |
| RENAL FILTRATION                                                | 9   | -0.348980126 | 0.144775047 |
| LYMPHOCYTE ACTIVATION INVOLVED IN IMMUNE RESPONSE               | 79  | -0.025643623 | 0.779866038 |
| POSITIVE REGULATION OF LEUKOCYTE CHEMOTAXIS                     | 75  | -0.118157887 | 0.197780959 |
| RESPONSE TO TUMOR NECROSIS FACTOR                               | 197 | -0.114942918 | 0.043467068 |
| POSITIVE REGULATION OF CELL SUBSTRATE ADHESION                  | 92  | -0.049651881 | 0.557015488 |
| PROTEIN ALKYLATION                                              | 102 | -0.114394686 | 0.147570081 |
| ATRIOVENTRICULAR VALVE MORPHOGENESIS                            | 15  | 0.204247766  | 0.341466    |
| REGULATION OF INTRACELLULAR TRANSPORT                           | 546 | -0.083792841 | 0.016684709 |
| CARDIAC CONDUCTION                                              | 68  | 0.089952068  | 0.37318332  |
| AORTA MORPHOGENESIS                                             | 19  | -0.009183242 | 0.960918206 |
| RESPONSE TO ALCOHOL                                             | 316 | -0.020300242 | 0.661088252 |
| CELLULAR HOMEOSTASIS                                            | 553 | -0.023278519 | 0.509243864 |
| POSITIVE REGULATION OF MULTICELLULAR ORGANISM GROWTH            | 26  | 0.093107021  | 0.567525684 |
| MEMBRANE LIPID BIOSYNTHETIC PROCESS                             | 100 | -0.100450282 | 0.208625262 |
| POSITIVE REGULATION OF DEPHOSPHORYLATION                        | 44  | 0.120267211  | 0.33809931  |
| PROTEIN INSERTION INTO MEMBRANE                                 | 19  | 0.231217292  | 0.223555243 |
| ACTIVATION OF MAPK ACTIVITY                                     | 117 | -0.009483654 | 0.900386883 |
| EMBRYONIC ORGAN DEVELOPMENT                                     | 355 | 0.068413154  | 0.124041178 |
| POSITIVE REGULATION OF NATURAL KILLER CELL MEDIATED IMMUNITY    | 16  | -0.143763007 | 0.463719569 |
| POSITIVE REGULATION OF ORGAN GROWTH                             | 34  | 0.069864418  | 0.623037881 |
| EPOXYGENASE P450 PATHWAY                                        | 12  | 0.089481608  | 0.708518656 |
| MAMMARY GLAND DUCT MORPHOGENESIS                                | 24  | -0.106540112 | 0.511337523 |
| NEGATIVE REGULATION OF ESTABLISHMENT OF PROTEIN LOCALIZATION TO |     |              |             |
| PLASMA MEMBRANE                                                 | 12  | 0.071958384  | 0.763575871 |
| AMINO ACID IMPORT                                               | 13  | 0.149891047  | 0.519935255 |
| IMP BIOSYNTHETIC PROCESS                                        | 11  | -0.059508032 | 0.806817067 |
| POSITIVE REGULATION OF CELL CYCLE G1 S PHASE TRANSITION         | 27  | -0.016248921 | 0.917570057 |
| LYMPHOCYTE APOPTOTIC PROCESS                                    | 18  | 0.291051592  | 0.136940435 |
| NEGATIVE REGULATION OF TRANSMEMBRANE RECEPTOR PROTEIN SERINE    |     |              |             |
| THREONINE KINASE SIGNALING PATHWAY                              | 90  | 0.105869256  | 0.229449225 |
| FATTY ACID DERIVATIVE METABOLIC PROCESS                         | 65  | 0.069241203  | 0.500853708 |
| REGULATION OF INTERFERON ALPHA PRODUCTION                       | 18  | -0.109680677 | 0.558003215 |
| NEGATIVE REGULATION OF INTERLEUKIN 17 PRODUCTION                | 9   | -0.084986624 | 0.750499201 |

|                                                                      |      |              |             |
|----------------------------------------------------------------------|------|--------------|-------------|
| GLYCOSYL COMPOUND CATABOLIC PROCESS                                  | 36   | 0.016032503  | 0.906811902 |
| PROTEIN HYDROXYLATION                                                | 15   | 0.215025915  | 0.327639162 |
| PEPTIDYL LYSINE METHYLATION                                          | 66   | -0.037820354 | 0.705457324 |
| REGULATION OF RESPONSE TO TUMOR CELL                                 | 9    | -0.146545366 | 0.574132852 |
| PROTEIN TETRAMERIZATION                                              | 117  | -0.006627319 | 0.930339824 |
| REGULATION OF TISSUE REMODELING                                      | 55   | -0.080192684 | 0.459233277 |
| RESPONSE TO ISOQUINOLINE ALKALOID                                    | 23   | -0.132387276 | 0.421345454 |
| POSITIVE REGULATION OF PEPTIDYL SERINE PHOSPHORYLATION               | 70   | -0.030623939 | 0.752982284 |
| HISTONE H3 ACETYLATION                                               | 46   | 0.109997654  | 0.371101494 |
| ENDOTHELIAL TUBE MORPHOGENESIS                                       | 11   | -0.210629785 | 0.359636128 |
| REGULATION OF ANION TRANSPORT                                        | 109  | 0.194438417  | 0.015159778 |
| CELLULAR RESPONSE TO DEXAMETHASONE STIMULUS                          | 23   | 0.011046167  | 0.94852397  |
| NEGATIVE REGULATION OF DNA REPLICATION                               | 51   | -0.143453267 | 0.193575972 |
| RESPONSE TO OSMOTIC STRESS                                           | 58   | -0.109554379 | 0.29513421  |
| REGULATION OF TRANSCRIPTION REGULATORY REGION DNA BINDING            | 34   | 0.012468944  | 0.929442853 |
| POSITIVE REGULATION OF INTERLEUKIN 6 PRODUCTION                      | 57   | 0.070530286  | 0.521180616 |
| RUFFLE ORGANIZATION                                                  | 20   | -0.183646099 | 0.286932257 |
| DNA PACKAGING                                                        | 166  | -0.123762882 | 0.044945049 |
| MUSCLE CELL MIGRATION                                                | 17   | -0.043181858 | 0.826031213 |
| BRANCHING INVOLVED IN SALIVARY GLAND MORPHOGENESIS                   | 16   | -0.029426519 | 0.884871623 |
| NEGATIVE REGULATION OF TRANSCRIPTION FROM RNA POLYMERASE II PROMOTER | 659  | 0.02118086   | 0.517405938 |
| SINGLE ORGANISM CATABOLIC PROCESS                                    | 797  | -0.021589883 | 0.466428183 |
| NEGATIVE REGULATION OF PROTEIN MATURATION                            | 30   | 0.018310607  | 0.902884163 |
| BINDING OF SPERM TO ZONA PELLUCIDA                                   | 25   | -0.005910388 | 0.971168669 |
| RNA PHOSPHODIESTER BOND HYDROLYSIS EXONUCLEOLYTIC                    | 35   | 0.029057525  | 0.834687821 |
| ADAPTATION OF SIGNALING PATHWAY                                      | 17   | -0.057731732 | 0.76795152  |
| TRANSCYTOSIS                                                         | 9    | 0.33853778   | 0.211346214 |
| EPITHELIAL CELL MATURATION                                           | 13   | 0.296806996  | 0.227268359 |
| NEGATIVE REGULATION OF GENE SILENCING                                | 17   | 0.090069936  | 0.655703413 |
| REGULATION OF CELL DEVELOPMENT                                       | 727  | 0.040279091  | 0.198608893 |
| REGULATION OF INTRINSIC APOPTOTIC SIGNALING PATHWAY                  | 133  | 0.022527741  | 0.752959903 |
| ESTABLISHMENT OF PROTEIN LOCALIZATION TO PLASMA MEMBRANE             | 83   | -0.01122628  | 0.900532462 |
| REGULATION OF MEMBRANE REPOLARIZATION                                | 25   | -0.099614961 | 0.533466644 |
| NEGATIVE REGULATION OF ORGANELLE ORGANIZATION                        | 357  | -0.06694397  | 0.120770674 |
| SNRNA METABOLIC PROCESS                                              | 82   | -0.031308718 | 0.727762431 |
| NEGATIVE REGULATION OF CELL DIFFERENTIATION                          | 519  | 0.0478923    | 0.193934251 |
| PEPTIDYL LYSINE DIMETHYLATION                                        | 12   | 0.499693411  | 0.032354125 |
| PROTEIN IMPORT INTO PEROXISOME MATRIX                                | 12   | 0.226932609  | 0.346716859 |
| POSITIVE REGULATION OF ATPASE ACTIVITY                               | 38   | -0.164700291 | 0.194449524 |
| ESTABLISHMENT OF PROTEIN LOCALIZATION TO GOLGI                       | 15   | 0.161133495  | 0.456292836 |
| POSITIVE REGULATION OF POTASSIUM ION TRANSMEMBRANE TRANSPORT         | 21   | -0.17949872  | 0.291250163 |
| LIMBIC SYSTEM DEVELOPMENT                                            | 84   | 0.09933929   | 0.275555089 |
| NEGATIVE REGULATION OF CELL KILLING                                  | 15   | -0.279187348 | 0.148237592 |
| POSITIVE REGULATION OF MONOCYTE CHEMOTAXIS                           | 15   | 0.101235945  | 0.636389653 |
| REGULATION OF CELLULAR PH                                            | 58   | 0.093836762  | 0.390400339 |
| NEGATIVE REGULATION OF LEUKOCYTE DIFFERENTIATION                     | 70   | -0.106545895 | 0.263276011 |
| AXIS ELONGATION                                                      | 26   | -0.08794434  | 0.575226527 |
| REGULATION OF MITOTIC CELL CYCLE                                     | 441  | -0.081406256 | 0.035943879 |
| CATABOLIC PROCESS                                                    | 1521 | -0.042831517 | 0.051089282 |
| T CELL DIFFERENTIATION                                               | 109  | 0.027210815  | 0.730759033 |
| REGULATION OF CATION CHANNEL ACTIVITY                                | 68   | -0.297112425 | 0.000896547 |
| POSITIVE REGULATION OF RECEPTOR RECYCLING                            | 11   | 0.073001517  | 0.770374397 |
| RESPONSE TO MISFOLDED PROTEIN                                        | 12   | 0.635174481  | 0.002918281 |
| TRANSMEMBRANE TRANSPORT                                              | 862  | 0.022611068  | 0.432629184 |
| REGULATION OF GENE EXPRESSION EPIGENETIC                             | 204  | -0.081100291 | 0.151598175 |
| NEGATIVE REGULATION OF NEURON DEATH                                  | 157  | -0.028141841 | 0.666062357 |
| NEGATIVE REGULATION OF CELLULAR COMPONENT ORGANIZATION               | 622  | -0.035633194 | 0.283847028 |
| DEFENSE RESPONSE TO FUNGUS                                           | 23   | -0.015504454 | 0.927375346 |
| RIBONUCLEOSIDE CATABOLIC PROCESS                                     | 21   | -0.080739997 | 0.64434175  |
| POSITIVE REGULATION OF CHONDROCYTE DIFFERENTIATION                   | 15   | -0.084109356 | 0.683752893 |
| POSITIVE REGULATION OF PHOSPHATIDYLINOSITOL 3 KINASE SIGNALING       | 57   | -0.025735901 | 0.811509126 |
| REGULATION OF FILOPODIUM ASSEMBLY                                    | 34   | 0.000125401  | 0.999287623 |
| REGULATION OF CELL PROJECTION SIZE                                   | 9    | 0.069372142  | 0.801570352 |
| NUCLEAR TRANSCRIBED MRNA CATABOLIC PROCESS EXONUCLEOLYTIC            | 31   | -0.106094007 | 0.457760348 |

|                                                                                            |      |              |             |
|--------------------------------------------------------------------------------------------|------|--------------|-------------|
| NEGATIVE REGULATION OF RYANODINE SENSITIVE CALCIUM RELEASE                                 | 12   | -0.112525079 | 0.622285562 |
| CHANNEL ACTIVITY                                                                           |      |              |             |
| POSITIVE REGULATION OF NITRIC OXIDE SYNTHASE ACTIVITY                                      | 17   | 0.064726602  | 0.747356663 |
| POSITIVE REGULATION OF CELL CYCLE PHASE TRANSITION                                         | 63   | -0.094573109 | 0.348297288 |
| MYELOID DENDRITIC CELL ACTIVATION                                                          | 23   | 0.052745967  | 0.759743548 |
| MESONEPHROS DEVELOPMENT                                                                    | 82   | 0.017444909  | 0.847824342 |
| EMBRYONIC HEART TUBE MORPHOGENESIS                                                         | 54   | -0.142498875 | 0.183047931 |
| MESODERMAL CELL FATE COMMITMENT                                                            | 11   | -0.085140775 | 0.723926997 |
| REGULATION OF DENDRITE DEVELOPMENT                                                         | 108  | -0.086708527 | 0.262205876 |
| RESPONSE TO LIGHT STIMULUS                                                                 | 235  | -0.11232843  | 0.031745647 |
| UTP METABOLIC PROCESS                                                                      | 9    | -0.441820862 | 0.056445721 |
| REGULATION OF AXONOGENESIS                                                                 | 154  | 0.119048131  | 0.077962455 |
| RIBOSOMAL SMALL SUBUNIT ASSEMBLY                                                           | 16   | -0.224282084 | 0.238671248 |
| REGULATION OF ACTIVIN RECEPTOR SIGNALING PATHWAY                                           | 24   | -0.036879115 | 0.82382694  |
| REGULATION OF SYSTEMIC ARTERIAL BLOOD PRESSURE BY HORMONE                                  | 29   | 0.128365891  | 0.405308667 |
| REGULATION OF NEUTROPHIL MIGRATION                                                         | 30   | 0.333730021  | 0.025528    |
| CELLULAR RESPONSE TO MECHANICAL STIMULUS                                                   | 70   | -0.055144423 | 0.568604552 |
| PENTOSE METABOLIC PROCESS                                                                  | 11   | -0.190991527 | 0.412093402 |
| POSITIVE REGULATION OF DEFENSE RESPONSE                                                    | 307  | -0.077425382 | 0.094549    |
| PHAGOCYTOSIS                                                                               | 131  | 0.053914058  | 0.457454022 |
| BRANCHING INVOLVED IN MAMMARY GLAND DUCT MORPHOGENESIS                                     | 18   | -0.215479747 | 0.228471149 |
| ALKALOID METABOLIC PROCESS                                                                 | 13   | -0.165025435 | 0.441730521 |
| POSITIVE REGULATION OF OXIDATIVE STRESS INDUCED CELL DEATH                                 | 9    | 0.014135958  | 0.958789718 |
| CENTROMERE COMPLEX ASSEMBLY                                                                | 47   | -0.178031173 | 0.115362602 |
| POSITIVE REGULATION OF MYELOID LEUKOCYTE MEDIATED IMMUNITY                                 | 15   | 0.057600979  | 0.787201544 |
| RRNA CONTAINING RIBONUCLEOPROTEIN COMPLEX EXPORT FROM NUCLEUS                              | 11   | 0.167471086  | 0.514516299 |
| MITOTIC SISTER CHROMATID COHESION                                                          | 12   | -0.212216037 | 0.337533967 |
| KINETOCHORE ORGANIZATION                                                                   | 12   | -0.223234103 | 0.305609872 |
| NEGATIVE REGULATION OF GLUCOSE IMPORT                                                      | 14   | 0.22659102   | 0.304238869 |
| GLUCOSE CATABOLIC PROCESS                                                                  | 25   | 0.116597118  | 0.483552594 |
| REGULATION OF MYOBLAST PROLIFERATION                                                       | 8    | 0.41030087   | 0.162319304 |
| ANTIGEN PROCESSING AND PRESENTATION OF ENDOGENOUS ANTIGEN                                  | 15   | -0.446771329 | 0.012166547 |
| REGULATION OF CAMP DEPENDENT PROTEIN KINASE ACTIVITY                                       | 13   | -0.251147897 | 0.232252998 |
| REGULATION OF TRANSCRIPTION INVOLVED IN G1 S TRANSITION OF MITOTIC CELL CYCLE              | 26   | -0.176795855 | 0.248408876 |
| POSITIVE REGULATION OF STRIATED MUSCLE CELL DIFFERENTIATION                                | 45   | -0.03519457  | 0.771369442 |
| INORGANIC ION TRANSMEMBRANE TRANSPORT                                                      | 448  | 0.03021124   | 0.443945954 |
| POSITIVE REGULATION OF INSULIN SECRETION INVOLVED IN CELLULAR RESPONSE TO GLUCOSE STIMULUS | 20   | 0.074801083  | 0.686532204 |
| NEGATIVE REGULATION OF CELL CYCLE                                                          | 401  | -0.1056866   | 0.008915444 |
| POSITIVE REGULATION OF CYCLIN DEPENDENT PROTEIN KINASE ACTIVITY                            | 32   | -0.240499525 | 0.076557285 |
| REGULATION OF ALPHA BETA T CELL PROLIFERATION                                              | 21   | 0.025220965  | 0.888294121 |
| AXONAL FASCICULATION                                                                       | 15   | -0.024489876 | 0.907208164 |
| INTRINSIC APOPTOTIC SIGNALING PATHWAY IN RESPONSE TO ENDOPLASMIC RETICULUM STRESS          | 30   | -0.203344916 | 0.147784641 |
| REGULATION OF CAMP METABOLIC PROCESS                                                       | 94   | 0.03378969   | 0.691645344 |
| REGULATION OF DEFENSE RESPONSE TO BACTERIUM                                                | 7    | -0.0738356   | 0.807810172 |
| POSITIVE REGULATION OF PATHWAY RESTRICTED SMAD PROTEIN PHOSPHORYLATION                     | 37   | 0.023957119  | 0.859462091 |
| FOLIC ACID METABOLIC PROCESS                                                               | 17   | 0.006881477  | 0.972387121 |
| REGIONALIZATION                                                                            | 267  | 0.048824265  | 0.33818001  |
| CENTRAL NERVOUS SYSTEM DEVELOPMENT                                                         | 755  | 0.018318388  | 0.550089662 |
| RESPONSE TO WATER                                                                          | 15   | -0.40355003  | 0.029879175 |
| REGULATION OF CELL KILLING                                                                 | 52   | 0.083434265  | 0.468957228 |
| REGULATION OF ORGAN MORPHOGENESIS                                                          | 214  | -0.058491217 | 0.292463404 |
| REGULATION OF CARBOHYDRATE CATABOLIC PROCESS                                               | 38   | 0.018799381  | 0.887920598 |
| REGULATION OF RESPIRATORY GASEOUS EXCHANGE                                                 | 20   | -0.240564544 | 0.150563852 |
| GLYCOSYL COMPOUND BIOSYNTHETIC PROCESS                                                     | 106  | -0.132528356 | 0.084924914 |
| CELLULAR GLUCURONIDATION                                                                   | 10   | 0.394247507  | 0.110128633 |
| RESPONSE TO OXIDATIVE STRESS                                                               | 319  | -0.037697357 | 0.411586179 |
| REGULATION OF JUN KINASE ACTIVITY                                                          | 74   | -0.042337137 | 0.653742958 |
| CEREBELLAR PURKINJE CELL LAYER DEVELOPMENT                                                 | 22   | -0.129009881 | 0.442989551 |
| PHOSPHOLIPID EFFLUX                                                                        | 10   | 0.696569202  | 0.000430853 |
| MUCOPOLYSACCHARIDE METABOLIC PROCESS                                                       | 95   | -0.127503861 | 0.117200642 |
| REGULATION OF PHOSPHORUS METABOLIC PROCESS                                                 | 1384 | -0.003793451 | 0.86931011  |
| TRNA PROCESSING                                                                            | 104  | -0.145632058 | 0.059271942 |

|                                                                     |      |              |             |
|---------------------------------------------------------------------|------|--------------|-------------|
| REGULATION OF SYNAPSE MATURATION                                    | 13   | 0.077601797  | 0.735533206 |
| REGULATION OF VASCULAR PERMEABILITY                                 | 27   | -0.074132076 | 0.631401429 |
| RESPONSE TO MECHANICAL STIMULUS                                     | 175  | -0.027284901 | 0.658970505 |
| SUBPALLIUM DEVELOPMENT                                              | 19   | -0.054015603 | 0.770676412 |
| SOMATIC RECOMBINATION OF IMMUNOGLOBULIN GENE SEGMENTS               | 20   | -0.141123482 | 0.426207328 |
| B CELL RECEPTOR SIGNALING PATHWAY                                   | 28   | -0.067530823 | 0.657216173 |
| RECEPTOR CATABOLIC PROCESS                                          | 16   | -0.018030572 | 0.929498625 |
| PYRIDINE NUCLEOTIDE BIOSYNTHETIC PROCESS                            | 15   | -0.297794031 | 0.121561347 |
| SIGNAL PEPTIDE PROCESSING                                           | 21   | 0.040812369  | 0.820634178 |
| EPITHELIAL CELL FATE COMMITMENT                                     | 12   | 0.239253955  | 0.322559541 |
| SODIUM ION TRANSPORT                                                | 105  | 0.124702109  | 0.126232542 |
| POSITIVE REGULATION OF INTERLEUKIN 2 BIOSYNTHETIC PROCESS           | 12   | 0.058425918  | 0.807199786 |
| REGULATION OF CGMP BIOSYNTHETIC PROCESS                             | 14   | 0.287915661  | 0.183128236 |
| APOPTOTIC MITOCHONDRIAL CHANGES                                     | 54   | -0.027466    | 0.804250085 |
| PROTEIN EXIT FROM ENDOPLASMIC RETICULUM                             | 20   | -0.383674132 | 0.027571372 |
| T CELL APOPTOTIC PROCESS                                            | 15   | 0.143958212  | 0.504132861 |
| RETINOIC ACID RECEPTOR SIGNALING PATHWAY                            | 15   | -0.1531253   | 0.450258165 |
| REGULATION OF NECROPTOTIC PROCESS                                   | 11   | -0.098058188 | 0.682585884 |
| NEGATIVE REGULATION OF HEART GROWTH                                 | 11   | 0.011855143  | 0.961773615 |
| POSITIVE REGULATION OF ASTROCYTE DIFFERENTIATION                    | 11   | 0.468710154  | 0.056012096 |
| SKELETAL SYSTEM MORPHOGENESIS                                       | 172  | 0.030291333  | 0.631232735 |
| REGULATION OF MULTICELLULAR ORGANISMAL METABOLIC PROCESS            | 30   | -0.405076779 | 0.001675468 |
| LEUKOTRIENE METABOLIC PROCESS                                       | 18   | 0.188403868  | 0.334665255 |
| POSITIVE REGULATION OF CHROMOSOME SEGREGATION                       | 24   | -0.024280829 | 0.883841222 |
| RRNA METHYLATION                                                    | 16   | -0.046804152 | 0.817149799 |
| GENE SILENCING BY RNA                                               | 134  | -0.131365292 | 0.055604336 |
| POSITIVE REGULATION OF TRIGLYCERIDE METABOLIC PROCESS               | 17   | 0.308601203  | 0.128510612 |
| REGULATION OF ENDOTHELIAL CELL PROLIFERATION                        | 89   | -0.043929902 | 0.609696184 |
| REGULATED EXOCYTOSIS                                                | 187  | -0.033496818 | 0.574970332 |
| CELL CELL ADHESION VIA PLASMA MEMBRANE ADHESION MOLECULES           | 152  | 0.002185066  | 0.973873457 |
| POSITIVE REGULATION OF NEURON APOPTOTIC PROCESS                     | 44   | -0.049708202 | 0.683882316 |
| TEMPERATURE HOMEOSTASIS                                             | 22   | 0.107162068  | 0.545178684 |
| EMBRYONIC CAMERA TYPE EYE FORMATION                                 | 10   | -0.100681343 | 0.690783245 |
| PROTEIN O LINKED GLYCOSYLATION                                      | 88   | 0.022413975  | 0.798635683 |
| PURINERGIC RECEPTOR SIGNALING PATHWAY                               | 19   | -0.027716498 | 0.881907692 |
| NEGATIVE REGULATION OF RECEPTOR BINDING                             | 11   | 0.141170105  | 0.572932917 |
| POSITIVE REGULATION OF SYNAPTIC TRANSMISSION GABAERGIC              | 6    | -0.201864539 | 0.519429423 |
| DOPAMINE TRANSPORT                                                  | 7    | 0.187600368  | 0.550534094 |
| REGULATION OF CALCIUM ION TRANSMEMBRANE TRANSPORTER ACTIVITY        | 54   | -0.315709534 | 0.001547551 |
| CIRCULATORY SYSTEM DEVELOPMENT                                      | 709  | -0.012308361 | 0.694996014 |
| CELLULAR RESPONSE TO VASCULAR ENDOTHELIAL GROWTH FACTOR<br>STIMULUS | 30   | 0.213739661  | 0.159147022 |
| POSITIVE REGULATION OF GLUCONEOGENESIS                              | 13   | 0.059584679  | 0.795108542 |
| REGULATION OF CELL PROLIFERATION                                    | 1297 | -0.008085804 | 0.733217509 |
| EMBRYONIC CAMERA TYPE EYE DEVELOPMENT                               | 29   | 0.0946574    | 0.540040943 |
| POSITIVE REGULATION OF EXECUTION PHASE OF APOPTOSIS                 | 11   | 0.35408667   | 0.14807462  |
| POSITIVE REGULATION OF DNA TEMPLATED TRANSCRIPTION ELONGATION       | 22   | -0.169676617 | 0.307270603 |
| N TERMINAL PROTEIN AMINO ACID MODIFICATION                          | 23   | -0.23559538  | 0.132652429 |
| REGULATION OF TYPE I INTERFERON PRODUCTION                          | 103  | -0.044021603 | 0.582471459 |
| NUCLEOTIDE EXCISION REPAIR PREINCISION COMPLEX STABILIZATION        | 20   | 0.304199383  | 0.099431371 |
| EMBRYONIC PLACENTA MORPHOGENESIS                                    | 21   | 0.295228457  | 0.098874969 |
| DOPAMINE RECEPTOR SIGNALING PATHWAY                                 | 24   | 0.097220852  | 0.567271933 |
| REGULATION OF ERAD PATHWAY                                          | 27   | -0.239491013 | 0.102379712 |
| BEHAVIOR                                                            | 418  | 0.025626896  | 0.529730895 |
| CYTOSKELETON DEPENDENT INTRACELLULAR TRANSPORT                      | 107  | -0.060186614 | 0.441903562 |
| MANNOSYLATION                                                       | 30   | -0.00416826  | 0.977736506 |
| DNA REPLICATION INDEPENDENT NUCLEOSOME ORGANIZATION                 | 52   | -0.108713983 | 0.324379718 |
| AXON EXTENSION                                                      | 33   | 0.006221526  | 0.965235614 |
| DERMATAN SULFATE METABOLIC PROCESS                                  | 13   | -0.0337853   | 0.88071879  |
| TRIVALENT INORGANIC CATION TRANSPORT                                | 35   | -0.000358298 | 0.997934722 |
| POSITIVE REGULATION OF PROTEIN TARGETING TO MEMBRANE                | 22   | -0.035956207 | 0.835410004 |
| BILE ACID METABOLIC PROCESS                                         | 22   | 0.019720686  | 0.91039354  |
| REGULATION OF SODIUM ION TRANSMEMBRANE TRANSPORT                    | 42   | 0.008050107  | 0.949306101 |
| INNERVATION                                                         | 21   | -0.171945651 | 0.316325251 |
| RESPONSE TO VIRUS                                                   | 208  | -0.093455583 | 0.093878328 |
| DEVELOPMENTAL MATURATION                                            | 158  | 0.055497339  | 0.401274398 |

|                                                                                            |      |              |             |
|--------------------------------------------------------------------------------------------|------|--------------|-------------|
| REGULATION OF CELLULAR AMINO ACID METABOLIC PROCESS                                        | 56   | -0.208380048 | 0.041631145 |
| ALCOHOL BIOSYNTHETIC PROCESS                                                               | 96   | -0.054468237 | 0.509971964 |
| REGULATION OF INSULIN RECEPTOR SIGNALING PATHWAY                                           | 37   | -0.083817124 | 0.524603267 |
| ADIPOSE TISSUE DEVELOPMENT                                                                 | 31   | 0.062781717  | 0.672983441 |
| PYRIDINE CONTAINING COMPOUND BIOSYNTHETIC PROCESS                                          | 18   | -0.35749121  | 0.036260425 |
| PROTEIN TARGETING TO LYSOSOME                                                              | 15   | 0.194547142  | 0.38157165  |
| ISOPRENOID METABOLIC PROCESS                                                               | 93   | 0.084588158  | 0.326613355 |
| NEGATIVE REGULATION OF SIGNAL TRANSDUCTION IN ABSENCE OF LIGAND                            | 30   | 0.128408904  | 0.398096837 |
| RENAL SYSTEM PROCESS INVOLVED IN REGULATION OF SYSTEMIC ARTERIAL BLOOD PRESSURE            | 18   | -0.020835557 | 0.913586356 |
| NEGATIVE REGULATION OF PROTEIN MODIFICATION PROCESS                                        | 559  | -0.023209646 | 0.508323433 |
| NEGATIVE REGULATION OF B CELL APOPTOTIC PROCESS                                            | 11   | -0.183398628 | 0.434645002 |
| RESPONSE TO UV B                                                                           | 13   | -0.035823259 | 0.873513179 |
| CELLULAR RESPONSE TO DRUG                                                                  | 59   | -0.050878881 | 0.62933823  |
| REGULATION OF RESPONSE TO DNA DAMAGE STIMULUS                                              | 138  | 0.023983588  | 0.732985782 |
| AUTOPHAGOSOME ORGANIZATION                                                                 | 41   | -0.087955399 | 0.48196466  |
| POSITIVE REGULATION OF BLOOD VESSEL ENDOTHELIAL CELL MIGRATION                             | 25   | 0.085460007  | 0.607066135 |
| PROTEIN AUTOPROCESSING                                                                     | 12   | 0.505370584  | 0.02286517  |
| ERYTHROCYTE DEVELOPMENT                                                                    | 21   | -0.274670008 | 0.098953728 |
| CELLULAR RESPONSE TO DNA DAMAGE STIMULUS                                                   | 664  | -0.020182106 | 0.532528609 |
| PHOSPHATIDYLINOSITOL ACYL CHAIN REMODELING                                                 | 11   | 0.309279091  | 0.206517703 |
| POLYOL BIOSYNTHETIC PROCESS                                                                | 24   | 0.112299236  | 0.509046303 |
| NEGATIVE REGULATION OF TUMOR NECROSIS FACTOR SUPERFAMILY CYTOKINE PRODUCTION               | 34   | 0.175984506  | 0.219138183 |
| ENDODERMAL CELL FATE COMMITMENT                                                            | 12   | -0.36735337  | 0.075649684 |
| MONOAMINE TRANSPORT                                                                        | 15   | -0.038602731 | 0.853725731 |
| RESPONSE TO STARVATION                                                                     | 143  | -0.005385242 | 0.937477327 |
| REGULATION OF GTPASE ACTIVITY                                                              | 570  | 0.027690148  | 0.430364363 |
| POSITIVE REGULATION OF CAMP MEDIATED SIGNALING                                             | 9    | 0.171474938  | 0.535786859 |
| RESPONSE TO REDOX STATE                                                                    | 12   | 0.143858824  | 0.548578305 |
| REGULATION OF GLUCONEOGENESIS                                                              | 34   | -0.077591877 | 0.5731851   |
| POST EMBRYONIC DEVELOPMENT                                                                 | 82   | -0.154200384 | 0.076299411 |
| CELLULAR DEFENSE RESPONSE                                                                  | 42   | 0.124270024  | 0.333311131 |
| BIOLOGICAL ADHESION                                                                        | 848  | -0.004288074 | 0.882007824 |
| CORTICAL CYTOSKELETON ORGANIZATION                                                         | 34   | -0.090255578 | 0.510399812 |
| HORMONE METABOLIC PROCESS                                                                  | 126  | 0.107212055  | 0.148994362 |
| RESPONSE TO PURINE CONTAINING COMPOUND                                                     | 136  | -0.133567644 | 0.049276533 |
| G PROTEIN COUPLED RECEPTOR SIGNALING PATHWAY COUPLED TO CYCLIC NUCLEOTIDE SECOND MESSENGER | 115  | 0.121613597  | 0.118408889 |
| UTERUS DEVELOPMENT                                                                         | 16   | 0.083309746  | 0.687777991 |
| THYROID GLAND DEVELOPMENT                                                                  | 23   | 0.104540209  | 0.548100472 |
| DNA REPLICATION                                                                            | 197  | -0.129440608 | 0.022461683 |
| NEURAL TUBE PATTERNING                                                                     | 31   | -0.116773526 | 0.412897448 |
| RESPONSE TO HISTAMINE                                                                      | 9    | 0.005307727  | 0.984492102 |
| RESPONSE TO MANGANESE ION                                                                  | 15   | -0.207913988 | 0.291148446 |
| REGULATION OF SISTER CHROMATID SEGREGATION                                                 | 65   | -0.133298813 | 0.173381196 |
| CELL CYCLE PROCESS                                                                         | 1000 | -0.093604361 | 0.000370378 |
| UNSATURATED FATTY ACID BIOSYNTHETIC PROCESS                                                | 39   | -0.088184682 | 0.491451207 |
| POSITIVE REGULATION OF MUSCLE CELL APOPTOTIC PROCESS                                       | 12   | -0.077495332 | 0.737734147 |
| SIALYLATION                                                                                | 17   | -0.039425227 | 0.841077952 |
| REGULATION OF GENE SILENCING                                                               | 50   | -0.020061671 | 0.86194177  |
| POSITIVE REGULATION OF AMINO ACID TRANSPORT                                                | 12   | 0.328739441  | 0.155907673 |
| ENDOCRINE PROCESS                                                                          | 36   | 0.153563047  | 0.268765636 |
| PRIMARY ALCOHOL METABOLIC PROCESS                                                          | 38   | 0.075374779  | 0.575268871 |
| PLATELET AGGREGATION                                                                       | 37   | -0.123520776 | 0.341959872 |
| TISSUE DEVELOPMENT                                                                         | 1280 | 0.036532245  | 0.128871092 |
| RNA INTERFERENCE                                                                           | 12   | -0.259424401 | 0.230931774 |
| POSITIVE REGULATION OF ESTABLISHMENT OF PROTEIN LOCALIZATION                               | 434  | -0.007323575 | 0.853943828 |
| WALKING BEHAVIOR                                                                           | 27   | 0.184222895  | 0.249841092 |
| REGULATION OF TELOMERASE ACTIVITY                                                          | 40   | 0.1356223    | 0.304637405 |
| REGULATION OF CELL AGING                                                                   | 33   | -0.130884026 | 0.342550502 |
| CELL GROWTH                                                                                | 120  | 0.06036029   | 0.426098222 |
| COFACTOR BIOSYNTHETIC PROCESS                                                              | 146  | -0.130195497 | 0.04737348  |
| LYSINE METABOLIC PROCESS                                                                   | 12   | 0.454489998  | 0.039693693 |
| NEGATIVE REGULATION OF CHONDROCYTE DIFFERENTIATION                                         | 15   | -0.33840591  | 0.068372543 |
| POSITIVE REGULATION OF AXONOGENESIS                                                        | 68   | 0.089338002  | 0.37645816  |

|                                                                  |      |              |             |
|------------------------------------------------------------------|------|--------------|-------------|
| TRANSMEMBRANE RECEPTOR PROTEIN SERINE THREONINE KINASE           | 167  | 0.02074339   | 0.745559662 |
| SIGNALING PATHWAY                                                |      |              |             |
| CHAPERONE MEDIATED PROTEIN FOLDING                               | 43   | -0.044933719 | 0.716243115 |
| POSITIVE REGULATION OF STEROID METABOLIC PROCESS                 | 19   | 0.345711597  | 0.058222821 |
| REGULATION OF LYMPHOCYTE MIGRATION                               | 34   | -0.20382542  | 0.126486274 |
| BONE MATURATION                                                  | 14   | -0.001919155 | 0.992996432 |
| CELLULAR RESPONSE TO REACTIVE OXYGEN SPECIES                     | 93   | -0.175351847 | 0.030358922 |
| NEGATIVE REGULATION OF CELL COMMUNICATION                        | 1052 | -0.012494283 | 0.631969646 |
| HEMOSTASIS                                                       | 270  | -0.053620898 | 0.279817529 |
| ZYMOGEN ACTIVATION                                               | 99   | -0.066090541 | 0.415681814 |
| AZOLE TRANSPORT                                                  | 15   | -0.354625519 | 0.07006369  |
| CELLULAR MACROMOLECULAR COMPLEX ASSEMBLY                         | 656  | -0.074244955 | 0.020861152 |
| NEGATIVE REGULATION OF CYTOSOLIC CALCIUM ION CONCENTRATION       | 7    | -0.174033758 | 0.549948624 |
| POSITIVE REGULATION OF PHOSPHATASE ACTIVITY                      | 26   | 0.096453166  | 0.554020363 |
| LYMPHOCYTE DIFFERENTIATION                                       | 176  | 0.02445466   | 0.694813791 |
| REGULATION OF POTASSIUM ION TRANSPORT                            | 67   | -0.036863042 | 0.710516832 |
| CELLULAR RESPONSE TO OXIDATIVE STRESS                            | 169  | -0.125851957 | 0.040021137 |
| NEURAL CREST CELL DIFFERENTIATION                                | 68   | 0.179638804  | 0.076286675 |
| ACTIVATION OF ANAPHASE PROMOTING COMPLEX ACTIVITY                | 12   | 0.11470533   | 0.632879527 |
| CALCIUM ION IMPORT INTO CYTOSOL                                  | 38   | -0.128189074 | 0.316855673 |
| MICROTUBULE POLYMERIZATION                                       | 23   | 0.174244461  | 0.318955903 |
| POSITIVE REGULATION OF MYELINATION                               | 9    | 0.412730895  | 0.120600894 |
| SPLICEOSOMAL SNRNP ASSEMBLY                                      | 35   | -0.229918332 | 0.072880351 |
| OLIGOSACCHARIDE LIPID INTERMEDIATE BIOSYNTHETIC PROCESS          | 19   | -0.161239575 | 0.368647781 |
| MONOCYTE DIFFERENTIATION                                         | 15   | -0.227093815 | 0.244137004 |
| REGULATION OF GONADOTROPIN SECRETION                             | 7    | 0.55552396   | 0.03073389  |
| RESPONSE TO LAMINAR FLUID SHEAR STRESS                           | 13   | -0.133692609 | 0.545268578 |
| RESPONSE TO LEAD ION                                             | 18   | 0.044098458  | 0.820643516 |
| DEFENSE RESPONSE TO BACTERIUM                                    | 140  | 0.029482892  | 0.673028062 |
| REGULATION OF RELEASE OF SEQUESTERED CALCIUM ION INTO CYTOSOL BY |      |              |             |
| SARCOPLASMIC RETICULUM                                           | 22   | -0.331711924 | 0.030038936 |
| NUCLEOTIDE SALVAGE                                               | 14   | 0.003911687  | 0.985743582 |
| ALCOHOL CATABOLIC PROCESS                                        | 50   | 0.053394628  | 0.648192845 |
| MYELOID DENDRITIC CELL DIFFERENTIATION                           | 20   | 0.089151663  | 0.631872753 |
| CELLULAR METABOLIC COMPOUND SALVAGE                              | 36   | -0.199144135 | 0.120838959 |
| COPULATION                                                       | 12   | 0.363144879  | 0.117027737 |
| REGULATION OF CATION TRANSMEMBRANE TRANSPORT                     | 169  | -0.153218494 | 0.011679883 |
| REGULATION OF VIRAL RELEASE FROM HOST CELL                       | 30   | 0.2659797    | 0.084661103 |
| NEPHRIC DUCT MORPHOGENESIS                                       | 11   | -0.038679136 | 0.874267502 |
| POSITIVE REGULATION OF NF KAPPAB IMPORT INTO NUCLEUS             | 23   | 0.18767814   | 0.279618095 |
| POSITIVE REGULATION OF NEURON PROJECTION DEVELOPMENT             | 213  | -0.036100121 | 0.519158393 |
| ESTROGEN METABOLIC PROCESS                                       | 21   | 0.09017923   | 0.618856438 |
| IRON ION HOMEOSTASIS                                             | 59   | 0.112395449  | 0.301306545 |
| PROTEOLYSIS                                                      | 967  | -0.039743449 | 0.140771923 |
| SYNAPSIS                                                         | 28   | 0.432367585  | 0.00378207  |
| ORGANELLE DISASSEMBLY                                            | 161  | -0.11267682  | 0.07322188  |
| REGULATION OF ER TO GOLGI VESICLE MEDIATED TRANSPORT             | 11   | 0.200603981  | 0.433526595 |
| RESPONSE TO IRON ION                                             | 31   | -0.11015325  | 0.441123405 |
| PHOSPHATIDYLINOSITOL 3 KINASE SIGNALING                          | 23   | 0.051810071  | 0.76368964  |
| LOCOMOTORY EXPLORATION BEHAVIOR                                  | 9    | -0.054905654 | 0.838266177 |
| PYRIMIDINE CONTAINING COMPOUND BIOSYNTHETIC PROCESS              | 38   | -0.223285614 | 0.071859626 |
| NUCLEAR CHROMOSOME SEGREGATION                                   | 206  | -0.110474721 | 0.047738286 |
| AUDITORY RECEPTOR CELL MORPHOGENESIS                             | 10   | -0.322564384 | 0.172664834 |
| REGULATION OF ODONTOGENESIS OF DENTIN CONTAINING TOOTH           | 7    | 0.010348569  | 0.973363926 |
| REGULATION OF WNT SIGNALING PATHWAY PLANAR CELL POLARITY         |      |              |             |
| PATHWAY                                                          | 10   | 0.361934495  | 0.156004113 |
| NEUROTROPHIN SIGNALING PATHWAY                                   | 21   | -0.395882272 | 0.011185243 |
| CELLULAR RESPONSE TO INTERFERON BETA                             | 15   | -0.02405122  | 0.90887948  |
| MITOCHONDRIAL ELECTRON TRANSPORT CYTOCHROME C TO OXYGEN          | 14   | -0.477456307 | 0.005401061 |
| NEGATIVE REGULATION OF VIRAL TRANSCRIPTION                       | 24   | 0.30663568   | 0.064779223 |
| FILOPODIUM ASSEMBLY                                              | 14   | -0.156319195 | 0.45550528  |
| RESPONSE TO TOPOLOGICALLY INCORRECT PROTEIN                      | 151  | -0.077678365 | 0.236973068 |
| STABILIZATION OF MEMBRANE POTENTIAL                              | 10   | 0.237973563  | 0.363740759 |
| ERK1 AND ERK2 CASCADE                                            | 18   | 0.117647352  | 0.548622149 |
| LENS FIBER CELL DEVELOPMENT                                      | 9    | -0.072175662 | 0.787301149 |
| SYNCYTIUM FORMATION                                              | 21   | 0.194030463  | 0.294398521 |

|                                                                                 |     |              |             |
|---------------------------------------------------------------------------------|-----|--------------|-------------|
| POSITIVE REGULATION OF MESONEPHROS DEVELOPMENT                                  | 19  | -0.130381488 | 0.471896504 |
| GLYCOSIDE METABOLIC PROCESS                                                     | 13  | 0.15957431   | 0.490791622 |
| HYDROGEN ION TRANSMEMBRANE TRANSPORT                                            | 85  | -0.146915604 | 0.085286571 |
| HETEROTYPIC CELL CELL ADHESION                                                  | 24  | 0.045547468  | 0.78705063  |
| NEGATIVE REGULATION OF HOMOTYPIC CELL CELL ADHESION                             | 89  | 0.017616048  | 0.840056392 |
| REGULATION OF SMOOTH MUSCLE CELL APOPTOTIC PROCESS                              | 14  | -0.175870701 | 0.394729657 |
| PROSTANOID BIOSYNTHETIC PROCESS                                                 | 17  | -0.160437638 | 0.395544045 |
| POSITIVE REGULATION OF ERAD PATHWAY                                             | 13  | 0.166234229  | 0.473192605 |
| CENTROSOME LOCALIZATION                                                         | 18  | 0.050070722  | 0.797208588 |
| ASTROCYTE DEVELOPMENT                                                           | 18  | 0.101982212  | 0.603407404 |
| RESPONSE TO MONOAMINE                                                           | 32  | 0.276416004  | 0.060566554 |
| TYROSINE PHOSPHORYLATION OF STAT PROTEIN                                        | 9   | 0.099434357  | 0.720035525 |
| METAPHASE PLATE CONGRESSION                                                     | 40  | 0.126327263  | 0.339032408 |
| POSITIVE REGULATION OF MYELOID LEUKOCYTE DIFFERENTIATION                        | 43  | 0.032897989  | 0.793605899 |
| POSITIVE REGULATION OF APOPTOTIC SIGNALING PATHWAY                              | 157 | -0.044251891 | 0.49574991  |
| POSITIVE REGULATION OF NFAT PROTEIN IMPORT INTO NUCLEUS                         | 10  | 0.053645083  | 0.837354252 |
| CELLULAR RESPONSE TO ABIOTIC STIMULUS                                           | 224 | -0.120489295 | 0.023964272 |
| RESPONSE TO HYDROGEN PEROXIDE                                                   | 101 | -0.056585904 | 0.4826206   |
| REGULATION OF DEVELOPMENTAL PIGMENTATION                                        | 16  | -0.09364069  | 0.639141138 |
| EXTRACELLULAR FIBRIL ORGANIZATION                                               | 12  | 0.338278803  | 0.144604489 |
| NEGATIVE REGULATION OF STRIATED MUSCLE CELL APOPTOTIC PROCESS                   | 15  | 0.118058876  | 0.583399986 |
| RIBONUCLEOSIDE DIPHOSPHATE METABOLIC PROCESS                                    | 59  | 0.061950947  | 0.565883323 |
| POSITIVE REGULATION OF ANION TRANSPORT                                          | 45  | 0.148087353  | 0.232536179 |
| INNER EAR RECEPTOR CELL DEVELOPMENT                                             | 28  | -0.111838359 | 0.456382175 |
| REGULATION OF MONOCYTE CHEMOTAXIS                                               | 20  | 0.031380465  | 0.864724389 |
| PEPTIDE TRANSPORT                                                               | 51  | 0.038074068  | 0.74184858  |
| T CELL SELECTION                                                                | 29  | 0.092231789  | 0.551267784 |
| NEGATIVE CHEMOTAXIS                                                             | 37  | 0.326109751  | 0.016607954 |
| PHAGOCYTOSIS RECOGNITION                                                        | 11  | -0.122254526 | 0.607762129 |
| MISFOLDED OR INCOMPLETELY SYNTHESIZED PROTEIN CATABOLIC PROCESS                 | 14  | 0.48222429   | 0.029634023 |
| RESPONSE TO MOLECULE OF BACTERIAL ORIGIN                                        | 277 | 0.029755824  | 0.550956194 |
| POST EMBRYONIC ORGAN DEVELOPMENT                                                | 13  | 0.118830495  | 0.606638395 |
| DEVELOPMENTAL GROWTH                                                            | 292 | 0.046983766  | 0.335457293 |
| REGULATION OF PROTEIN TARGETING                                                 | 268 | -0.036026822 | 0.471323357 |
| THYROID HORMONE GENERATION                                                      | 10  | 0.097130443  | 0.711364813 |
| REGULATION OF SYSTEMIC ARTERIAL BLOOD PRESSURE MEDIATED BY A<br>CHEMICAL SIGNAL | 37  | 0.08717682   | 0.522768386 |
| CENTRAL NERVOUS SYSTEM NEURON AXONOGENESIS                                      | 24  | -0.002612769 | 0.987518661 |
| V D J RECOMBINATION                                                             | 14  | 0.298548081  | 0.181023257 |
| METANEPHROS MORPHOGENESIS                                                       | 23  | 0.018732636  | 0.912951513 |
| GLYCOPROTEIN METABOLIC PROCESS                                                  | 304 | -0.053914568 | 0.249554302 |
| POSITIVE REGULATION OF GLUCOSE IMPORT IN RESPONSE TO INSULIN<br>STIMULUS        | 11  | -0.011103795 | 0.964017686 |
| SINGLE ORGANISM CELLULAR LOCALIZATION                                           | 815 | -0.029478743 | 0.314186182 |
| RETINA MORPHOGENESIS IN CAMERA TYPE EYE                                         | 36  | 0.007107859  | 0.958534017 |
| ANTIGEN PROCESSING AND PRESENTATION OF ENDOGENOUS PEPTIDE<br>ANTIGEN            | 13  | -0.521151019 | 0.004767047 |
| HISTONE H3 DEACETYLATION                                                        | 20  | 0.114339509  | 0.540825493 |
| REGULATION OF SYNAPTIC VESICLE TRANSPORT                                        | 25  | 0.116703744  | 0.482966251 |
| POSITIVE REGULATION OF CARDIAC MUSCLE CELL DIFFERENTIATION                      | 13  | 0.053648564  | 0.815015754 |
| REGULATION OF DNA TEMPLATED TRANSCRIPTION ELONGATION                            | 40  | -0.030023811 | 0.81542237  |
| LENS DEVELOPMENT IN CAMERA TYPE EYE                                             | 56  | -0.111433221 | 0.293776526 |
| NEGATIVE REGULATION OF CATABOLIC PROCESS                                        | 190 | 0.005364616  | 0.928506439 |
| REGULATION OF OXIDATIVE STRESS INDUCED INTRINSIC APOPTOTIC<br>SIGNALING PATHWAY | 25  | 0.138769575  | 0.406069283 |
| POSITIVE REGULATION OF MACROPHAGE DIFFERENTIATION                               | 11  | -0.181824833 | 0.437234227 |
| REGULATION OF RESPONSE TO REACTIVE OXYGEN SPECIES                               | 34  | -0.108652707 | 0.425779642 |
| NEGATIVE REGULATION OF INTRACELLULAR TRANSPORT                                  | 127 | -0.103239906 | 0.145918554 |
| VASCULAR PROCESS IN CIRCULATORY SYSTEM                                          | 138 | 0.062333734  | 0.378048672 |
| MULTI ORGANISM BEHAVIOR                                                         | 64  | 0.001071288  | 0.991660562 |
| REGULATION OF BICELLULAR TIGHT JUNCTION ASSEMBLY                                | 12  | 0.338151583  | 0.15615756  |
| DNA METABOLIC PROCESS                                                           | 676 | -0.036394998 | 0.254689867 |
| INTESTINAL ABSORPTION                                                           | 22  | 0.412095478  | 0.019149329 |
| MALE SEX DIFFERENTIATION                                                        | 118 | 0.114453264  | 0.136958025 |
| REGULATION OF SKELETAL MUSCLE CELL PROLIFERATION                                | 10  | -0.272203911 | 0.246425478 |
| NEGATIVE REGULATION OF KERATINOCYTE PROLIFERATION                               | 12  | -0.265069747 | 0.216637818 |

|                                                                 |     |              |             |
|-----------------------------------------------------------------|-----|--------------|-------------|
| LAMELLIPODIUM ASSEMBLY                                          | 30  | -0.237750051 | 0.086122502 |
| RESPONSE TO WATER DEPRIVATION                                   | 8   | -0.601750033 | 0.011510548 |
| MITOTIC CHROMOSOME CONDENSATION                                 | 14  | -0.344820457 | 0.073431412 |
| ANATOMICAL STRUCTURE HOMEOSTASIS                                | 238 | 0.017219594  | 0.748174767 |
| REGULATION OF TRANSMEMBRANE TRANSPORT                           | 330 | 0.015269393  | 0.738132351 |
| REGULATION OF EPITHELIAL TO MESENCHYMAL TRANSITION              | 61  | 0.150754076  | 0.159953727 |
| DNA ALKYLATION                                                  | 36  | 0.079514551  | 0.565575562 |
| POSITIVE REGULATION OF TRANSCRIPTION FROM RNA POLYMERASE II     |     |              |             |
| PROMOTER IN RESPONSE TO ENDOPLASMIC RETICULUM STRESS            | 12  | -0.204039468 | 0.357788565 |
| RENAL SYSTEM PROCESS                                            | 81  | -0.118858097 | 0.177709371 |
| LEUKOCYTE HOMEOSTASIS                                           | 51  | -0.121593039 | 0.274252459 |
| POSITIVE REGULATION OF ORGANELLE ASSEMBLY                       | 44  | -0.138612442 | 0.243944357 |
| LUNG ALVEOLUS DEVELOPMENT                                       | 37  | -0.020326639 | 0.879472277 |
| PROGESTERONE METABOLIC PROCESS                                  | 10  | -0.005239981 | 0.98382554  |
| SPLEEN DEVELOPMENT                                              | 35  | 0.09147852   | 0.516380806 |
| RHO PROTEIN SIGNAL TRANSDUCTION                                 | 44  | -0.003659253 | 0.976344133 |
| RESPONSE TO LEPTIN                                              | 19  | -0.059468367 | 0.747782453 |
| NEUROPEPTIDE SIGNALING PATHWAY                                  | 58  | 0.129404245  | 0.236691779 |
| ACTIVATION OF PROTEIN KINASE A ACTIVITY                         | 14  | -0.165025374 | 0.427321534 |
| POSITIVE REGULATION OF VASCULAR ENDOTHELIAL GROWTH FACTOR       |     |              |             |
| PRODUCTION                                                      | 25  | 0.085219806  | 0.608282825 |
| AMP METABOLIC PROCESS                                           | 14  | 0.047417327  | 0.829946426 |
| DEVELOPMENT OF PRIMARY SEXUAL CHARACTERISTICS                   | 172 | 0.037708158  | 0.550703734 |
| NEGATIVE REGULATION OF OSTEOCLAST DIFFERENTIATION               | 21  | -0.271413608 | 0.094092081 |
| REGULATION OF RNA SPLICING                                      | 92  | 0.008622479  | 0.91986089  |
| REGULATION OF BLOOD CIRCULATION                                 | 243 | 0.085024334  | 0.113151184 |
| NEGATIVE REGULATION OF MITOCHONDRION ORGANIZATION               | 38  | -0.231364713 | 0.060434701 |
| NEGATIVE REGULATION OF SUBSTRATE ADHESION DEPENDENT CELL        |     |              |             |
| SPREADING                                                       | 13  | 0.143325189  | 0.536989437 |
| EMBRYONIC CRANIAL SKELETON MORPHOGENESIS                        | 43  | 0.040441299  | 0.748065399 |
| CELLULAR PROTEIN COMPLEX LOCALIZATION                           | 20  | 0.405898673  | 0.036353638 |
| CELLULAR RESPONSE TO GONADOTROPIN STIMULUS                      | 11  | 0.550398318  | 0.01067744  |
| REGULATION OF HISTONE H3 K9 ACETYLATION                         | 14  | 0.106441667  | 0.631908994 |
| INTRACELLULAR ESTROGEN RECEPTOR SIGNALING PATHWAY               | 17  | 0.132723534  | 0.512823691 |
| NEGATIVE REGULATION OF DNA DAMAGE RESPONSE SIGNAL TRANSDUCTION  |     |              |             |
| BY P53 CLASS MEDIATOR                                           | 13  | 0.037516986  | 0.869689485 |
| CARDIAC CELL DEVELOPMENT                                        | 41  | -0.008028233 | 0.949872815 |
| REGULATION OF EXECUTION PHASE OF APOPTOSIS                      | 22  | 0.159188729  | 0.373593376 |
| RESPONSE TO CALCIUM ION                                         | 100 | -0.045074199 | 0.578883098 |
| NEGATIVE REGULATION OF FATTY ACID METABOLIC PROCESS             | 22  | 0.154984533  | 0.382040607 |
| REGULATION OF INTERLEUKIN 12 PRODUCTION                         | 41  | -0.050399107 | 0.689965478 |
| POSITIVE REGULATION OF ALPHA BETA T CELL ACTIVATION             | 45  | 0.028401148  | 0.817146376 |
| REGULATION OF TRANSCRIPTION INITIATION FROM RNA POLYMERASE II   |     |              |             |
| PROMOTER                                                        | 20  | -0.176643791 | 0.30930255  |
| POSITIVE REGULATION OF CYTOSOLIC CALCIUM ION CONCENTRATION      |     |              |             |
| INVOLVED IN PHOSPHOLIPASE C ACTIVATING G PROTEIN COUPLED        | 11  | 0.034317075  | 0.890116056 |
| SIGNALING PATHWAY                                               |     |              |             |
| INNER EAR MORPHOGENESIS                                         | 72  | -0.025630821 | 0.789644466 |
| RESPONSE TO ACTIVITY                                            | 59  | 0.055146692  | 0.609014012 |
| ESTROUS CYCLE                                                   | 17  | -0.119098285 | 0.534776237 |
| ORGANELLE FUSION                                                | 111 | 0.021833664  | 0.780312924 |
| REGULATION OF PROTEIN PHOSPHATASE TYPE 2A ACTIVITY              | 23  | -0.160367242 | 0.32846878  |
| STEROID CATABOLIC PROCESS                                       | 21  | 0.056831541  | 0.752790094 |
| REGULATION OF CELL FATE COMMITMENT                              | 21  | 0.270801975  | 0.133828617 |
| REGULATION OF CELL MORPHOGENESIS                                | 500 | 0.046228369  | 0.218058875 |
| DNA DAMAGE RESPONSE SIGNAL TRANSDUCTION RESULTING IN            |     |              |             |
| TRANSCRIPTION                                                   | 15  | -0.273570619 | 0.152561684 |
| ACUTE PHASE RESPONSE                                            | 32  | -0.008038621 | 0.955637791 |
| POSITIVE REGULATION OF INSULIN LIKE GROWTH FACTOR RECEPTOR      |     |              |             |
| SIGNALING PATHWAY                                               | 10  | 0.015453239  | 0.952533256 |
| NEGATIVE REGULATION OF PROTEIN SERINE THREONINE KINASE ACTIVITY | 116 | -0.188514112 | 0.009331752 |
| S ADENOSYLHOMOCYSTEINE METABOLIC PROCESS                        | 12  | -0.199384271 | 0.366195765 |
| CELLULAR RESPONSE TO ALKALOID                                   | 31  | 0.035084666  | 0.812678238 |
| NEGATIVE REGULATION OF PEPTIDASE ACTIVITY                       | 187 | 0.016101714  | 0.789759139 |
| MYOBLAST FUSION                                                 | 15  | 0.032754317  | 0.877653054 |
| TRNA MODIFICATION                                               | 54  | -0.133731463 | 0.213017319 |

|                                                                                     |      |              |             |
|-------------------------------------------------------------------------------------|------|--------------|-------------|
| CYTOSOLIC TRANSPORT                                                                 | 190  | -0.018317836 | 0.75812612  |
| INOSITOL LIPID MEDIATED SIGNALING                                                   | 111  | 0.002840234  | 0.970944643 |
| POSITIVE REGULATION OF ACTIN FILAMENT DEPOLYMERIZATION                              | 12   | 0.148467273  | 0.537355289 |
| DNA CATABOLIC PROCESS ENDONUCLEOLYTIC                                               | 16   | 0.011125973  | 0.956737984 |
| POSITIVE REGULATION OF GLIOGENESIS                                                  | 40   | 0.074844209  | 0.569007976 |
| LACTATION                                                                           | 36   | -0.320895626 | 0.00984229  |
| NEGATIVE REGULATION OF RESPONSE TO EXTERNAL STIMULUS                                | 235  | 0.065838987  | 0.226248788 |
| REGULATION OF NUCLEAR TRANSCRIBED MRNA CATABOLIC PROCESS                            | 14   | 0.195565546  | 0.381633198 |
| DEADENYLATION DEPENDENT DECAY                                                       | 25   | 0.277838282  | 0.092692814 |
| REGULATION OF NEUTROPHIL CHEMOTAXIS                                                 | 13   | -0.354322542 | 0.075742248 |
| MRNA TRANSCRIPTION FROM RNA POLYMERASE II PROMOTER                                  | 32   | 0.073382014  | 0.616667939 |
| EMBRYO IMPLANTATION                                                                 | 35   | -0.003192862 | 0.981586113 |
| RECEPTOR CLUSTERING                                                                 | 12   | 0.210848612  | 0.376316674 |
| PIGMENT ACCUMULATION                                                                | 11   | 0.0886688    | 0.723218637 |
| FATTY ACID ELONGATION                                                               | 36   | -0.216701358 | 0.089473773 |
| CYTOSKELETON DEPENDENT CYTOKINESIS                                                  | 25   | 0.020462654  | 0.900956657 |
| QUINONE METABOLIC PROCESS                                                           | 17   | -0.031145629 | 0.874395744 |
| FLUID TRANSPORT                                                                     | 59   | -0.037615786 | 0.72205936  |
| SYNAPSE ASSEMBLY                                                                    | 50   | -0.158905934 | 0.150679094 |
| PIGMENT METABOLIC PROCESS                                                           | 369  | -0.006237711 | 0.884817635 |
| IMMUNE EFFECTOR PROCESS                                                             | 89   | 0.04747591   | 0.588493137 |
| ODONTOGENESIS                                                                       | 9    | -0.185256938 | 0.469862617 |
| CORPUS CALLOSUM DEVELOPMENT                                                         | 13   | 0.043746116  | 0.848405392 |
| REGULATION OF SYNAPTIC TRANSMISSION DOPAMINERGIC                                    | 152  | 0.007163357  | 0.914586775 |
| POSITIVE REGULATION OF CELL MORPHOGENESIS INVOLVED IN DIFFERENTIATION               | 11   | -0.172899541 | 0.465261369 |
| POSITIVE REGULATION OF SODIUM ION TRANSMEMBRANE TRANSPORTER ACTIVITY                | 17   | -0.17469875  | 0.353241505 |
| NUCLEOBASE BIOSYNTHETIC PROCESS                                                     | 34   | -0.068424618 | 0.619904863 |
| NEGATIVE REGULATION OF LYMPHOCYTE DIFFERENTIATION                                   | 82   | 0.035525997  | 0.696968614 |
| GOLGI ORGANIZATION                                                                  | 276  | -0.020353478 | 0.680809854 |
| POSITIVE REGULATION OF CELL PROJECTION ORGANIZATION                                 | 160  | -0.033660359 | 0.601873638 |
| REGULATION OF OSSIFICATION                                                          | 258  | 0.010566619  | 0.837374407 |
| EXTRACELLULAR STRUCTURE ORGANIZATION                                                | 221  | 0.036165881  | 0.517088624 |
| DIVALENT INORGANIC CATION TRANSPORT                                                 | 33   | -0.014008507 | 0.921480196 |
| B CELL ACTIVATION INVOLVED IN IMMUNE RESPONSE                                       | 1559 | 0.009938359  | 0.650197657 |
| REGULATION OF TRANSCRIPTION FROM RNA POLYMERASE II PROMOTER                         | 52   | 0.038311145  | 0.73787931  |
| NEGATIVE REGULATION OF NUCLEOTIDE METABOLIC PROCESS                                 | 103  | -0.058100133 | 0.466202981 |
| PROTEIN HETEROOLIGOMERIZATION                                                       | 335  | -0.049331527 | 0.26975725  |
| REGULATION OF APOPTOTIC SIGNALING PATHWAY                                           | 15   | 0.597062127  | 0.001183742 |
| SIGNAL TRANSDUCTION INVOLVED IN REGULATION OF GENE EXPRESSION                       | 49   | -0.142598725 | 0.207721375 |
| ACTIVATION OF MAPKK ACTIVITY                                                        | 33   | 0.204943029  | 0.159979884 |
| GLANDULAR EPITHELIAL CELL DIFFERENTIATION                                           | 179  | -0.032037144 | 0.599819185 |
| POSITIVE REGULATION OF PROTEIN MODIFICATION BY SMALL PROTEIN CONJUGATION OR REMOVAL | 566  | -0.010002339 | 0.774895716 |
| NEGATIVE REGULATION OF CELL PROLIFERATION                                           | 22   | -0.214661073 | 0.192758995 |
| REGULATION OF T CELL MIGRATION                                                      | 72   | -0.078705277 | 0.405807309 |
| POSITIVE REGULATION OF LEUKOCYTE MEDIATED IMMUNITY                                  | 33   | -0.115755744 | 0.400895392 |
| CAMP MEDIATED SIGNALING                                                             | 33   | -0.056327918 | 0.688640166 |
| POSITIVE REGULATION OF GLUCOSE METABOLIC PROCESS                                    | 83   | 0.071197885  | 0.434886662 |
| REGULATION OF PRODUCTION OF MOLECULAR MEDIATOR OF IMMUNE RESPONSE                   | 47   | 0.012441664  | 0.917297776 |
| PROTEIN TARGETING TO MITOCHONDRION                                                  | 75   | -0.085252815 | 0.357792446 |
| POSITIVE REGULATION OF OSSIFICATION                                                 | 171  | -0.079749053 | 0.196322311 |
| RESPONSE TO REACTIVE OXYGEN SPECIES                                                 | 214  | 0.012397772  | 0.826203651 |
| REGULATION OF VASCULATURE DEVELOPMENT                                               | 12   | -0.068381351 | 0.768548579 |
| DETECTION OF CALCIUM ION                                                            | 53   | 0.055386502  | 0.626217106 |
| RNA PHOSPHODIESTER BOND HYDROLYSIS ENDONUCLEOLYTIC                                  | 12   | 0.056375432  | 0.813286668 |
| FRUCTOSE METABOLIC PROCESS                                                          | 115  | 0.007075526  | 0.926488268 |
| EYE MORPHOGENESIS                                                                   | 14   | -0.074894698 | 0.727435939 |
| NEGATIVE REGULATION OF INTERLEUKIN 2 PRODUCTION                                     | 33   | -0.020000323 | 0.887915459 |
| POSITIVE CHEMOTAXIS                                                                 | 18   | -0.092792697 | 0.623068951 |
| NEGATIVE REGULATION OF MRNA SPLICING VIA SPLICEOSOME                                | 16   | -0.201704286 | 0.296005397 |
| RESPONSE TO NITRIC OXIDE                                                            | 31   | 0.017688587  | 0.904623584 |
| HEAD MORPHOGENESIS                                                                  | 16   | 0.201519702  | 0.331879546 |
| REGULATION OF FATTY ACID BETA OXIDATION                                             |      |              |             |

|                                         |     |              |             |
|-----------------------------------------|-----|--------------|-------------|
| REGULATION OF STEM CELL DIFFERENTIATION | 102 | 0.159382232  | 0.05479202  |
| BRAIN MORPHOGENESIS                     | 28  | -0.06322224  | 0.677931692 |
| AMINE BIOSYNTHETIC PROCESS              | 16  | -0.189009834 | 0.324482603 |

**Table S3.** miRNA GO cellular compartment.

| GO Term                                                | Genes Tested | Model Coefficient | p-value     |
|--------------------------------------------------------|--------------|-------------------|-------------|
| FILOPODIUM                                             | 84           | -0.222707517      | 0.00838746  |
| NUCLEAR CHROMOSOME TELOMERIC REGION                    | 127          | 0.006482312       | 0.929237192 |
| CLATHRIN SCULPTED VESICLE                              | 10           | -0.214481703      | 0.373653491 |
| I BAND                                                 | 101          | -0.018575293      | 0.819342727 |
| AGGRESOME                                              | 31           | 0.095352418       | 0.523559116 |
| MULTIVESICULAR BODY                                    | 31           | 0.04796439        | 0.746575375 |
| RNA CAP BINDING COMPLEX                                | 12           | -0.286765339      | 0.177951616 |
| LOW DENSITY LIPOPROTEIN PARTICLE                       | 10           | 0.5703163         | 0.014005636 |
| EXTRACELLULAR MATRIX                                   | 327          | 0.099146105       | 0.032922821 |
| PHAGOCYTIC VESICLE                                     | 78           | 0.06758257        | 0.472387857 |
| ENDOLYSOSOME                                           | 14           | -0.016305434      | 0.940354479 |
| 90S PRERIBOSOME                                        | 23           | -0.102218288      | 0.537851558 |
| CYTOCHROME COMPLEX                                     | 17           | -0.432078086      | 0.008849098 |
| CHROMOSOME                                             | 813          | -0.034575047      | 0.237874805 |
| CONDENSED NUCLEAR CHROMOSOME                           | 73           | -0.070282839      | 0.456366848 |
| NUCLEAR ENVELOPE                                       | 381          | -0.140212734      | 0.000643603 |
| RETROMER COMPLEX                                       | 20           | 0.249413409       | 0.19563816  |
| PROTEASOME COMPLEX                                     | 73           | -0.133574981      | 0.149890729 |
| NUCLEAR EXOSOME RNASE COMPLEX                          | 15           | -0.188890813      | 0.344579886 |
| ER TO GOLGI TRANSPORT VESICLE                          | 65           | -0.335135065      | 0.00022396  |
| TRANSCRIPTION FACTOR TFIID COMPLEX                     | 23           | -0.012173736      | 0.942992    |
| CENTRIOLE                                              | 93           | -0.077671805      | 0.352143459 |
| MICROTUBULE CYTOSKELETON                               | 951          | -0.041359601      | 0.128114283 |
| LYSOSOMAL LUMEN                                        | 79           | -0.100774048      | 0.261646576 |
| PRE AUTOPHAGOSOMAL STRUCTURE                           | 29           | 0.138816037       | 0.372567124 |
| CELL CELL CONTACT ZONE                                 | 58           | -0.345241032      | 0.000304234 |
| MUSCLE MYOSIN COMPLEX                                  | 13           | 0.276121385       | 0.218773802 |
| VOLTAGE GATED CALCIUM CHANNEL COMPLEX                  | 31           | 0.286731857       | 0.053245027 |
| INFLAMMASOME COMPLEX                                   | 7            | -0.028190645      | 0.926878375 |
| IMMUNOLOGICAL SYNAPSE                                  | 28           | -0.035682662      | 0.816123474 |
| GABA RECEPTOR COMPLEX                                  | 13           | 0.138980231       | 0.546214171 |
| ENDOPLASMIC RETICULUM TUBULAR NETWORK                  | 12           | 0.08244124        | 0.731182963 |
| FILOPODIUM MEMBRANE                                    | 17           | -0.271581128      | 0.136502196 |
| PHOSPHATASE COMPLEX                                    | 44           | -0.030519612      | 0.803487693 |
| TRANSCRIPTION EXPORT COMPLEX                           | 13           | -0.453983673      | 0.012463189 |
| SPERM PART                                             | 100          | 0.162324316       | 0.053522101 |
| U1 SNRNP                                               | 17           | -0.462082347      | 0.006052632 |
| ANCHORED COMPONENT OF EXTERNAL SIDE OF PLASMA MEMBRANE | 10           | -0.164515562      | 0.507629659 |
| NUCLEOID                                               | 43           | 0.003547591       | 0.977362397 |
| KINESIN COMPLEX                                        | 44           | -0.173515262      | 0.140025747 |
| HOLO TFIIF COMPLEX                                     | 11           | 0.075453006       | 0.762435037 |
| BASOLATERAL PLASMA MEMBRANE                            | 167          | 0.006404441       | 0.91996486  |
| NUCLEAR OUTER MEMBRANE                                 | 18           | -0.084905836      | 0.652826167 |
| CATION TRANSPORTING ATPASE COMPLEX                     | 13           | 0.102275655       | 0.657459247 |
| CYTOPLASMIC STRESS GRANULE                             | 30           | -0.205366326      | 0.15339435  |
| SECRETORY GRANULE                                      | 278          | 0.064741367       | 0.196207406 |
| INTRINSIC COMPONENT OF MITOCHONDRIAL OUTER MEMBRANE    | 20           | -0.109339186      | 0.538004339 |
| OXIDOREDUCTASE COMPLEX                                 | 85           | -0.13936077       | 0.103096836 |
| VESICLE MEMBRANE                                       | 445          | 0.032902404       | 0.406253427 |
| SAGA COMPLEX                                           | 8            | 0.105722303       | 0.718991108 |
| CYTOPLASMIC UBIQUITIN LIGASE COMPLEX                   | 12           | -0.376462737      | 0.064577428 |
| AUTOPHAGOSOME                                          | 71           | -0.047230866      | 0.623558055 |
| LARGE RIBOSOMAL SUBUNIT                                | 90           | -0.295721248      | 0.000150864 |
| H4 HISTONE ACETYLTRANSFERASE COMPLEX                   | 18           | -0.359851971      | 0.037288323 |
| ZYMOGEN GRANULE                                        | 12           | -0.018572723      | 0.937075109 |
| TRANS GOLGI NETWORK TRANSPORT VESICLE MEMBRANE         | 12           | 0.15989427        | 0.508126945 |
| ENDOSOME LUMEN                                         | 20           | 0.013201973       | 0.942657797 |
| INTERCALATED DISC                                      | 46           | -0.295595011      | 0.007044394 |
| LATE ENDOSOME MEMBRANE                                 | 97           | 0.011523707       | 0.890271107 |

|                                                                          |      |              |             |
|--------------------------------------------------------------------------|------|--------------|-------------|
| EXCITATORY SYNAPSE                                                       | 176  | -0.068452548 | 0.261969893 |
| TRANSFERASE COMPLEX TRANSFERRING PHOSPHORUS CONTAINING GROUPS            | 227  | -0.130794111 | 0.013460542 |
| CHROMOSOME CENTROMERIC REGION                                            | 167  | -0.180795226 | 0.002769079 |
| DNA POLYMERASE COMPLEX                                                   | 13   | -0.089375637 | 0.68676271  |
| PLATELET ALPHA GRANULE                                                   | 64   | -0.101642879 | 0.307622668 |
| TELOMERASE HOLOENZYME COMPLEX                                            | 18   | -0.425804854 | 0.008372328 |
| INTRINSIC COMPONENT OF ORGANELLE MEMBRANE                                | 249  | -0.145438331 | 0.00381883  |
| ADA2 GCN5 ADA3 TRANSCRIPTION ACTIVATOR COMPLEX                           | 15   | 0.355694221  | 0.081339664 |
| SARCOPLASMIC RETICULUM MEMBRANE                                          | 29   | -0.03860004  | 0.797789598 |
| U2 TYPE SPLICEOSOMAL COMPLEX                                             | 30   | -0.416506438 | 0.001032299 |
| PLASMA MEMBRANE RECEPTOR COMPLEX                                         | 136  | -0.040874878 | 0.558164485 |
| ACROSOMAL MEMBRANE                                                       | 14   | 0.537599563  | 0.005730613 |
| MICROBODY MEMBRANE                                                       | 52   | 0.01073153   | 0.924930767 |
| BASAL LAMINA                                                             | 17   | 0.060833227  | 0.76192336  |
| COPI VESICLE COAT                                                        | 13   | -0.305716105 | 0.14459162  |
| CYTOPLASMIC SIDE OF MEMBRANE                                             | 150  | -0.03793242  | 0.568670095 |
| PLATELET ALPHA GRANULE MEMBRANE                                          | 13   | -0.1614868   | 0.453907912 |
| NEURON PROJECTION TERMINUS                                               | 112  | 0.088738227  | 0.260086342 |
| CYTOPLASMIC REGION                                                       | 256  | -0.059676405 | 0.240552637 |
| PROTEASOME REGULATORY PARTICLE BASE SUBCOMPLEX                           | 10   | -0.610367584 | 0.001217673 |
| SECRETORY GRANULE LUMEN                                                  | 65   | 0.025479877  | 0.803118741 |
| RIBOSOME                                                                 | 214  | -0.181518861 | 0.000703086 |
| MHC PROTEIN COMPLEX                                                      | 22   | -0.280789449 | 0.075527108 |
| ACTIN CYTOSKELETON                                                       | 389  | -0.037575285 | 0.367261904 |
| GLYCOPROTEIN COMPLEX                                                     | 18   | -0.12900942  | 0.489768873 |
| COATED PIT                                                               | 65   | 0.172474429  | 0.097903138 |
| EXOCYTIC VESICLE                                                         | 125  | 0.165561376  | 0.027206906 |
| RNA POLYMERASE COMPLEX                                                   | 119  | -0.092123517 | 0.210274815 |
| MRNA CLEAVAGE FACTOR COMPLEX                                             | 17   | 0.27037301   | 0.191427653 |
| PERINUCLEAR REGION OF CYTOPLASM                                          | 574  | 0.005985357  | 0.863650003 |
| NUCLEOLAR PART                                                           | 58   | -0.101551294 | 0.33270143  |
| RNA POLYMERASE II TRANSCRIPTION FACTOR COMPLEX                           | 94   | -0.119032619 | 0.14617303  |
| INO80 TYPE COMPLEX                                                       | 21   | -0.063577981 | 0.717567394 |
| CELL CORTEX PART                                                         | 107  | -0.097796746 | 0.206040145 |
| SMN COMPLEX                                                              | 13   | 0.066340851  | 0.772589982 |
| GOLGI STACK                                                              | 114  | -0.092180634 | 0.220284887 |
| SCF UBIQUITIN LIGASE COMPLEX                                             | 32   | -0.186593069 | 0.170737235 |
| CD40 RECEPTOR COMPLEX                                                    | 10   | -0.290635459 | 0.208901473 |
| BLOC 1 COMPLEX                                                           | 15   | 0.018801591  | 0.929375106 |
| T CELL RECEPTOR COMPLEX                                                  | 14   | 0.061589809  | 0.780618994 |
| CYTOSOLIC PART                                                           | 197  | -0.157878007 | 0.004947233 |
| VACUOLE                                                                  | 1036 | -0.050665856 | 0.052041183 |
| SECRETORY VESICLE                                                        | 372  | 0.094817503  | 0.029688958 |
| NUCLEAR SPECK                                                            | 187  | -0.126257408 | 0.030514065 |
| NUCLEAR TRANSCRIPTIONAL REPRESSOR COMPLEX                                | 21   | -0.371584827 | 0.022258487 |
| NUCLEAR CYCLIN DEPENDENT PROTEIN KINASE HOLOENZYME COMPLEX               | 15   | -0.3678848   | 0.054285912 |
| SITE OF POLARIZED GROWTH                                                 | 133  | -0.076326519 | 0.275062572 |
| ENDOCYTIC VESICLE                                                        | 220  | 0.133821682  | 0.018301645 |
| CHROMOSOMAL REGION                                                       | 314  | -0.121890441 | 0.007073206 |
| INCLUSION BODY                                                           | 65   | -0.020750757 | 0.837553051 |
| MITOTIC SPINDLE                                                          | 50   | -0.178651887 | 0.104669402 |
| ANAPHASE PROMOTING COMPLEX                                               | 21   | -0.125532776 | 0.466830678 |
| NUCLEAR INCLUSION BODY                                                   | 12   | -0.484492804 | 0.016736234 |
| CELL PROJECTION CYTOPLASM                                                | 48   | 0.025163702  | 0.832358129 |
| PROTON TRANSPORTING TWO SECTOR ATPASE COMPLEX PROTON TRANSPORTING DOMAIN | 19   | -0.141259368 | 0.432267778 |
| MALE GERM CELL NUCLEUS                                                   | 10   | 0.441366172  | 0.122037536 |
| MYOFILAMENT                                                              | 19   | 0.067017805  | 0.72412173  |
| GEMINI OF COILED BODIES                                                  | 11   | 0.054646533  | 0.826439517 |
| CELL PROJECTION MEMBRANE                                                 | 240  | -0.047700035 | 0.365011556 |
| APICAL PART OF CELL                                                      | 297  | -0.008341062 | 0.861633861 |
| INTRINSIC COMPONENT OF ENDOPLASMIC RETICULUM MEMBRANE                    | 123  | -0.228798177 | 0.000943116 |
| SPINDLE POLE                                                             | 115  | -0.06249149  | 0.407412919 |
| FANCONI ANAEMIA NUCLEAR COMPLEX                                          | 13   | -0.01023132  | 0.963963995 |
| SEX CHROMOSOME                                                           | 25   | -0.340117713 | 0.019252816 |
| MRNA CLEAVAGE AND POLYADENYLATION SPECIFICITY FACTOR COMPLEX             | 12   | 0.478215403  | 0.056758945 |

|                                                    |      |              |             |
|----------------------------------------------------|------|--------------|-------------|
| NEURON PART                                        | 1069 | 0.021260693  | 0.414536834 |
| CAJAL BODY                                         | 50   | -0.180967172 | 0.101139268 |
| ROUGH ENDOPLASMIC RETICULUM                        | 61   | -0.103312617 | 0.312253456 |
| TRANSFERASE COMPLEX                                | 660  | -0.081277177 | 0.011099675 |
| VACUOLAR PROTON TRANSPORTING V TYPE ATPASE COMPLEX | 13   | -0.07248603  | 0.744919469 |
| APICAL JUNCTION COMPLEX                            | 107  | -0.048977593 | 0.532367843 |
| MICROBODY                                          | 114  | -0.003162943 | 0.967172127 |
| GERM CELL NUCLEUS                                  | 13   | -0.018359658 | 0.935292933 |
| INTRINSIC COMPONENT OF PLASMA MEMBRANE             | 1217 | 0.048142295  | 0.050930475 |
| PORE COMPLEX                                       | 14   | 0.222245664  | 0.314610644 |
| LUMENAL SIDE OF MEMBRANE                           | 27   | -0.293221946 | 0.039153672 |
| GOLGI ASSOCIATED VESICLE MEMBRANE                  | 45   | -0.13967811  | 0.236048522 |
| CYTOPLASMIC EXOSOME RNASE COMPLEX                  | 15   | -0.150829824 | 0.454468    |
| LIPID PARTICLE                                     | 55   | 0.038013533  | 0.732814028 |
| INTRINSIC COMPONENT OF PEROXISOMAL MEMBRANE        | 11   | 0.235853019  | 0.343777837 |
| VESICLE COAT                                       | 43   | -0.092563423 | 0.448619149 |
| POSTSYNAPSE                                        | 319  | -0.063124241 | 0.166532091 |
| PRECATALYTIC SPLICEOSOME                           | 21   | -0.213831611 | 0.195553169 |
| AXON                                               | 359  | 0.069562283  | 0.116000095 |
| CLATHRIN COAT                                      | 43   | 0.077549423  | 0.540509275 |
| BASAL PLASMA MEMBRANE                              | 28   | 0.058974559  | 0.706206166 |
| MCM COMPLEX                                        | 11   | 0.023868611  | 0.923299941 |
| NUCLEAR BODY                                       | 331  | -0.133539524 | 0.002426439 |
| AMPA GLUTAMATE RECEPTOR COMPLEX                    | 23   | 0.127037648  | 0.464577444 |
| CLATHRIN COATED VESICLE                            | 134  | 0.097139089  | 0.178473453 |
| PROTEIN KINASE COMPLEX                             | 84   | -0.23579599  | 0.004914178 |
| VESICLE LUMEN                                      | 84   | 0.041509893  | 0.64541276  |
| PROTEIN COMPLEX INVOLVED IN CELL ADHESION          | 25   | -0.077472789 | 0.62967165  |
| TRANS GOLGI NETWORK                                | 181  | 0.12311134   | 0.048805778 |
| PHOTORECEPTOR OUTER SEGMENT MEMBRANE               | 9    | 0.16049216   | 0.565844172 |
| HOPS COMPLEX                                       | 12   | 0.05184732   | 0.827856307 |
| IONOTROPIC GLUTAMATE RECEPTOR COMPLEX              | 38   | 0.093422885  | 0.488453549 |
| ORGANELLE MEMBRANE CONTACT SITE                    | 10   | -0.103606673 | 0.68049147  |
| SODIUM CHANNEL COMPLEX                             | 14   | -0.008413922 | 0.969257731 |
| EUKARYOTIC TRANSLATION INITIATION FACTOR 3 COMPLEX | 15   | -0.586959517 | 0.004607628 |
| CCR4 NOT COMPLEX                                   | 14   | 0.081083402  | 0.715127989 |
| M BAND                                             | 16   | 0.024206005  | 0.906285586 |
| NPBAF COMPLEX                                      | 12   | -0.017621899 | 0.940305429 |
| OUTER MITOCHONDRIAL MEMBRANE PROTEIN COMPLEX       | 11   | -0.194280714 | 0.401072897 |
| CORTICAL CYTOSKELETON                              | 74   | -0.156905595 | 0.084724122 |
| MYOSIN FILAMENT                                    | 15   | 0.250473608  | 0.238749194 |
| NEURONAL POSTSYNAPTIC DENSITY                      | 48   | 0.003308705  | 0.977695441 |
| INTERMEDIATE FILAMENT                              | 97   | 0.139568725  | 0.100104063 |
| CYTOSOLIC SMALL RIBOSOMAL SUBUNIT                  | 41   | -0.117442139 | 0.344203724 |
| SNARE COMPLEX                                      | 49   | -0.137890118 | 0.220208582 |
| DNA REPLICATION FACTOR A COMPLEX                   | 12   | 0.789269212  | 1.64E-05    |
| UBIQUITIN LIGASE COMPLEX                           | 239  | -0.03256697  | 0.538580219 |
| ROUGH ENDOPLASMIC RETICULUM MEMBRANE               | 19   | -0.145140989 | 0.420636786 |
| AXON INITIAL SEGMENT                               | 11   | 0.052863537  | 0.831985282 |
| U2 SNRNP                                           | 19   | -0.450376683 | 0.002817156 |
| ACTIN FILAMENT BUNDLE                              | 51   | 0.079555764  | 0.493604517 |
| PERINUCLEAR ENDOPLASMIC RETICULUM                  | 12   | -0.180396609 | 0.422747697 |
| CILIARY TIP                                        | 37   | 0.030954609  | 0.819293004 |
| PRONUCLEUS                                         | 14   | -0.390548392 | 0.041873855 |
| ORGANELLE INNER MEMBRANE                           | 465  | -0.135930119 | 0.000262295 |
| GOLGI CISTERNA                                     | 84   | -0.118279687 | 0.173203876 |
| NUCLEAR NUCLEOSOME                                 | 33   | 0.106026796  | 0.464534569 |
| PCG PROTEIN COMPLEX                                | 43   | -0.052618304 | 0.669877343 |
| GOLGI APPARATUS PART                               | 787  | -0.01999573  | 0.502682621 |
| POTASSIUM CHANNEL COMPLEX                          | 65   | 0.135209273  | 0.192104479 |
| SMALL RIBOSOMAL SUBUNIT                            | 65   | -0.14171143  | 0.147603707 |
| COPI COATED VESICLE MEMBRANE                       | 17   | -0.37882877  | 0.032494046 |
| PROTON TRANSPORTING TWO SECTOR ATPASE COMPLEX      | 43   | -0.145476453 | 0.22448826  |
| CENTROSOME                                         | 445  | -0.064445629 | 0.09670238  |
| SET1C COMPASS COMPLEX                              | 9    | 0.072916133  | 0.791669986 |
| CYTOPLASMIC MRNA PROCESSING BODY                   | 65   | -0.221187107 | 0.020443721 |

|                                                                |      |              |             |
|----------------------------------------------------------------|------|--------------|-------------|
| PROTEIN PHOSPHATASE TYPE 1 COMPLEX                             | 10   | -0.301480933 | 0.208255354 |
| NODE OF RANVIER                                                | 13   | 0.204440221  | 0.378997216 |
| COMPACT MYELIN                                                 | 13   | -0.216705704 | 0.30717231  |
| MOTILE CILIUM                                                  | 69   | 0.160131922  | 0.113628358 |
| MICROVILLUS                                                    | 59   | 0.149378241  | 0.171333289 |
| DENDRITIC SHAFT                                                | 31   | -0.0159237   | 0.913472728 |
| CYTOSOLIC PROTEASOME COMPLEX                                   | 10   | -0.514633521 | 0.008978746 |
| PML BODY                                                       | 90   | -0.185483597 | 0.023822337 |
| CELL CORTEX REGION                                             | 15   | 0.165348022  | 0.4406775   |
| NEURON SPINE                                                   | 104  | -0.078820111 | 0.318060971 |
| ENDOPLASMIC RETICULUM PART                                     | 1003 | -0.062953204 | 0.017128335 |
| NUCLEAR CHROMOSOME                                             | 481  | 0.00141968   | 0.970133823 |
| ENDOCYTIC VESICLE MEMBRANE                                     | 131  | 0.104406773  | 0.153234861 |
| HIGH DENSITY LIPOPROTEIN PARTICLE                              | 16   | 0.279523473  | 0.171175183 |
| NMDA SELECTIVE GLUTAMATE RECEPTOR COMPLEX                      | 8    | -0.025953909 | 0.92808496  |
| BLOOD MICROPARTICLE                                            | 83   | 0.035930207  | 0.691959816 |
| PRERIBOSOME                                                    | 58   | -0.168766592 | 0.10048392  |
| PARANODE REGION OF AXON                                        | 11   | 0.269032611  | 0.279251553 |
| AXONAL GROWTH CONE                                             | 19   | 0.144465428  | 0.448783277 |
| PROTEIN DNA COMPLEX                                            | 153  | 0.042574375  | 0.525255674 |
| APICAL DENDRITE                                                | 15   | 0.151712593  | 0.480512412 |
| ACTOMYOSIN                                                     | 58   | 0.083592598  | 0.443263857 |
| STEREOCILUM BUNDLE                                             | 33   | 0.063021088  | 0.66191223  |
| ORGANELAR RIBOSOME                                             | 69   | -0.175158154 | 0.061200519 |
| TRANSCRIPTIONAL REPRESSOR COMPLEX                              | 70   | -0.037168065 | 0.702072874 |
| NUCLEAR REPLICATION FORK                                       | 36   | 0.214040765  | 0.123996449 |
| INVADOPODIUM                                                   | 9    | -0.285871057 | 0.251765786 |
| EXON EXON JUNCTION COMPLEX                                     | 20   | 0.023053235  | 0.900233804 |
| CILIARY PART                                                   | 235  | -0.026438422 | 0.620970013 |
| COSTAMERE                                                      | 19   | -0.195113341 | 0.277240198 |
| SWI SNF SUPERFAMILY TYPE COMPLEX                               | 68   | -0.095866123 | 0.32365361  |
| CHROMATIN                                                      | 411  | 0.01328381   | 0.74606627  |
| BASEMENT MEMBRANE                                              | 80   | -0.037876112 | 0.67693245  |
| BRUSH BORDER                                                   | 87   | 0.02855103   | 0.746901138 |
| MITOCHONDRIAL MATRIX                                           | 372  | -0.124746939 | 0.002731143 |
| PLATELET DENSE TUBULAR NETWORK                                 | 9    | -0.257762044 | 0.302320342 |
| CELL JUNCTION                                                  | 1006 | -0.05256358  | 0.046685082 |
| NUCLEAR CHROMATIN                                              | 268  | 0.020253081  | 0.689118001 |
| COMPLEX OF COLLAGEN TRIMERS                                    | 22   | -0.153844278 | 0.358855121 |
| EARLY ENDOSOME MEMBRANE                                        | 98   | 0.0558562    | 0.505080653 |
| TRANSCRIPTION FACTOR COMPLEX                                   | 263  | -0.091035765 | 0.067466812 |
| MYELIN SHEATH                                                  | 159  | -0.019829735 | 0.76008287  |
| SPLICEOSOMAL TRI SNRNP COMPLEX                                 | 26   | 0.033704859  | 0.834819537 |
| PLATELET ALPHA GRANULE LUMEN                                   | 45   | -0.096895845 | 0.415222928 |
| MICROVILLUS MEMBRANE                                           | 15   | -0.412051649 | 0.028405884 |
| RIBONUCLEOPROTEIN GRANULE                                      | 139  | -0.1291181   | 0.056171908 |
| CLATHRIN COATED ENDOCYTIC VESICLE                              | 49   | 0.199645303  | 0.095894359 |
| ARP2 3 PROTEIN COMPLEX                                         | 11   | -0.148022605 | 0.52887562  |
| LEADING EDGE MEMBRANE                                          | 121  | -0.035766658 | 0.629155204 |
| CONTRACTILE FIBER                                              | 174  | 0.030839878  | 0.623122948 |
| TRANSCRIPTION FACTOR TFTC COMPLEX                              | 14   | -0.041552464 | 0.847817791 |
| CYTOSOLIC LARGE RIBOSOMAL SUBUNIT                              | 59   | -0.31523784  | 0.000946878 |
| CLUSTER OF ACTIN BASED CELL PROJECTIONS                        | 114  | 0.044678017  | 0.564636997 |
| PROTEINACEOUS EXTRACELLULAR MATRIX                             | 275  | 0.100547078  | 0.046952591 |
| PHAGOCYTIC CUP                                                 | 17   | 0.021502077  | 0.914124845 |
| PROTON TRANSPORTING TWO SECTOR ATPASE COMPLEX CATALYTIC DOMAIN | 15   | 0.090210371  | 0.674083088 |
| CYTOSKELETAL PART                                              | 1191 | -0.018912442 | 0.442218565 |
| MICROTUBULE                                                    | 346  | -0.041711887 | 0.344003499 |
| CYTOSKELETON                                                   | 1657 | -0.016799852 | 0.4289257   |
| COPI COATED VESICLE                                            | 23   | -0.270015277 | 0.08842752  |
| NUCLEAR EUCHROMATIN                                            | 21   | 0.143744226  | 0.429915219 |
| CORTICAL ACTIN CYTOSKELETON                                    | 53   | -0.159361867 | 0.137887896 |
| PERICENTRIC HETEROCHROMATIN                                    | 15   | -0.30097274  | 0.111896898 |
| GLIAL CELL PROJECTION                                          | 14   | -0.074025513 | 0.730112702 |
| SPECIFIC GRANULE                                               | 14   | -0.07659907  | 0.720995484 |
| HETEROTRIMERIC G PROTEIN COMPLEX                               | 29   | 0.270440285  | 0.078077147 |

|                                                              |      |              |             |
|--------------------------------------------------------------|------|--------------|-------------|
| ENDOPLASMIC RETICULUM LUMEN                                  | 173  | 0.009779614  | 0.876015055 |
| LATERAL PLASMA MEMBRANE                                      | 46   | -0.140738482 | 0.225907927 |
| BANDED COLLAGEN FIBRIL                                       | 11   | 0.395756846  | 0.099814098 |
| EXTRINSIC COMPONENT OF ORGANELLE MEMBRANE                    | 24   | 0.107905271  | 0.526061803 |
| PLATELET DENSE GRANULE LUMEN                                 | 10   | 0.21143348   | 0.417862797 |
| INTRACELLULAR VESICLE                                        | 1075 | 0.027454807  | 0.291337845 |
| MYOSIN COMPLEX                                               | 51   | 0.087178158  | 0.453862554 |
| VOLTAGE GATED SODIUM CHANNEL COMPLEX                         | 12   | -0.018826918 | 0.936206436 |
| DNA REPAIR COMPLEX                                           | 37   | -0.008783184 | 0.947890888 |
| CLATHRIN VESICLE COAT                                        | 21   | 0.234564589  | 0.199525717 |
| SIN3 COMPLEX                                                 | 13   | 0.099269073  | 0.668447406 |
| ESCRT COMPLEX                                                | 26   | 0.263995979  | 0.112048    |
| CELL SUBSTRATE JUNCTION                                      | 386  | -0.140801815 | 0.000556802 |
| CILIARY TRANSITION ZONE                                      | 21   | -0.169690806 | 0.316936247 |
| U5 SNRNP                                                     | 16   | -0.230398542 | 0.226245661 |
| ENDOCYTIC VESICLE LUMEN                                      | 16   | 0.235036978  | 0.257417069 |
| HISTONE METHYLTRANSFERASE COMPLEX                            | 67   | -0.172739773 | 0.069882107 |
| MICROTUBULE PLUS END                                         | 17   | 0.152394143  | 0.452764349 |
| SAGA TYPE COMPLEX                                            | 31   | -0.016586076 | 0.909873402 |
| CELL DIVISION SITE                                           | 51   | -0.170755522 | 0.116689168 |
| EXTRACELLULAR MATRIX COMPONENT                               | 110  | 0.029298522  | 0.709835677 |
| NUCLEAR HETEROCHROMATIN                                      | 30   | -0.03426729  | 0.81726822  |
| TCTN B9D COMPLEX                                             | 11   | 0.055302358  | 0.824429349 |
| PRC1 COMPLEX                                                 | 12   | 0.171125253  | 0.476991201 |
| GOLGI ASSOCIATED VESICLE                                     | 75   | -0.139948774 | 0.126446358 |
| INTRINSIC COMPONENT OF GOLGI MEMBRANE                        | 51   | -0.170406258 | 0.118311125 |
| SYNAPSE                                                      | 637  | 0.008518313  | 0.797344904 |
| CHLORIDE CHANNEL COMPLEX                                     | 37   | 0.028754636  | 0.831840961 |
| CLATHRIN COAT OF COATED PIT                                  | 15   | 0.413759045  | 0.04239775  |
| SIN3 TYPE COMPLEX                                            | 16   | 0.057669196  | 0.780634004 |
| POSTSYNAPTIC MEMBRANE                                        | 162  | -0.043470358 | 0.496773863 |
| SMALL SUBUNIT PROCESSOME                                     | 32   | -0.104461757 | 0.458069445 |
| RUFFLE MEMBRANE                                              | 75   | -0.082853798 | 0.371821999 |
| EXTERNAL ENCAPSULATING STRUCTURE                             | 9    | 0.4838951    | 0.200878725 |
| CELL TRAILING EDGE                                           | 11   | -0.586538021 | 0.004368541 |
| CATION CHANNEL COMPLEX                                       | 127  | 0.108850829  | 0.14199864  |
| MLL1 2 COMPLEX                                               | 28   | 0.106663743  | 0.497103911 |
| METHYLTRANSFERASE COMPLEX                                    | 86   | -0.107322838 | 0.212124319 |
| NUCLEOPLASM PART                                             | 665  | -0.093805223 | 0.003179186 |
| SYNAPTONEMAL COMPLEX                                         | 27   | 0.204226093  | 0.20147164  |
| ORGANELLAR SMALL RIBOSOMAL SUBUNIT                           | 25   | -0.211721134 | 0.166261373 |
| CELL CELL ADHERENS JUNCTION                                  | 49   | -0.17648617  | 0.11290639  |
| N TERMINAL PROTEIN ACETYLTRANSFERASE COMPLEX                 | 10   | -0.133411003 | 0.59215885  |
| PROTON TRANSPORTING ATP SYNTHASE COMPLEX COUPLING FACTOR F O | 10   | -0.300421579 | 0.19093862  |
| CONNEXON COMPLEX                                             | 13   | -0.088244167 | 0.690366517 |
| GOLGI MEMBRANE                                               | 628  | -0.01999543  | 0.547091508 |
| COATED VESICLE MEMBRANE                                      | 124  | -0.140856559 | 0.047940166 |
| SMOOTH ENDOPLASMIC RETICULUM                                 | 27   | -0.190197696 | 0.200735819 |
| ENDORIBONUCLEASE COMPLEX                                     | 20   | -0.060590141 | 0.736811568 |
| ATPASE COMPLEX                                               | 20   | 0.283393375  | 0.128661196 |
| NUCLEAR INNER MEMBRANE                                       | 46   | -0.057003548 | 0.63255539  |
| LATE ENDOSOME                                                | 190  | -0.049641201 | 0.400581435 |
| VACUOLAR LUMEN                                               | 98   | -0.054313601 | 0.506706822 |
| LAMELLIPODIUM MEMBRANE                                       | 17   | 0.347603917  | 0.080203584 |
| EXOSOME RNASE COMPLEX                                        | 21   | -0.130393243 | 0.448579206 |
| ER TO GOLGI TRANSPORT VESICLE MEMBRANE                       | 49   | -0.34647215  | 0.000960646 |
| SPINDLE MIDZONE                                              | 25   | -0.415859216 | 0.003776031 |
| PRESYNAPTIC MEMBRANE                                         | 46   | -0.129352867 | 0.266840905 |
| NUCLEAR MEMBRANE PART                                        | 10   | 0.148209628  | 0.573870214 |
| XY BODY                                                      | 13   | -0.315504966 | 0.122982837 |
| MITOCHONDRIAL MEMBRANE PART                                  | 157  | -0.216163426 | 0.000428137 |
| COP9 SIGNALOSOME                                             | 29   | -0.11578207  | 0.432186502 |
| INNER MITOCHONDRIAL MEMBRANE PROTEIN COMPLEX                 | 96   | -0.182124163 | 0.02139088  |
| NEURON PROJECTION                                            | 812  | 0.001938233  | 0.947654313 |
| BLOC COMPLEX                                                 | 20   | -0.032191999 | 0.859341864 |
| BETA CATENIN DESTRUCTION COMPLEX                             | 13   | 0.256558923  | 0.265700043 |

|                                                                    |      |              |             |
|--------------------------------------------------------------------|------|--------------|-------------|
| APICOLATERAL PLASMA MEMBRANE                                       | 15   | -0.015559043 | 0.941101167 |
| CATALYTIC COMPLEX                                                  | 961  | -0.041251366 | 0.127294531 |
| FILOPODIUM TIP                                                     | 9    | -0.18394439  | 0.474745983 |
| MISMATCH REPAIR COMPLEX                                            | 10   | -0.011651561 | 0.963995049 |
| AXONEME PART                                                       | 15   | 0.005413979  | 0.979584176 |
| KINETOCHORE                                                        | 116  | -0.142078034 | 0.052553972 |
| INTERSTITIAL MATRIX                                                | 12   | 0.152197751  | 0.528533386 |
| EXTRACELLULAR SPACE                                                | 997  | 0.07794982   | 0.004113222 |
| CYTOPLASMIC DYNEIN COMPLEX                                         | 14   | 0.293616508  | 0.183703787 |
| ENDOLYSOSOME MEMBRANE                                              | 10   | 0.031822636  | 0.902724273 |
| PRESPLICEOSOME                                                     | 21   | -0.35222208  | 0.024924457 |
| CHD TYPE COMPLEX                                                   | 17   | -0.295424428 | 0.109050617 |
| SPERM PRINCIPAL PIECE                                              | 12   | 0.171113061  | 0.477559094 |
| CATALYTIC STEP 2 SPLICEOSOME                                       | 85   | -0.213544996 | 0.010844425 |
| VIRION                                                             | 3    | 0.421916987  | 0.332800205 |
| VACUOLAR PART                                                      | 622  | -0.021390029 | 0.521282539 |
| MITOCHONDRIAL PART                                                 | 856  | -0.130475013 | 3.12E-06    |
| MITOCHONDRION                                                      | 1478 | -0.096911764 | 1.08E-05    |
| CELL SURFACE                                                       | 589  | 0.009419734  | 0.784506267 |
| HEMOGLOBIN COMPLEX                                                 | 6    | 0.027881315  | 0.933838671 |
| DENDRITE MEMBRANE                                                  | 15   | -0.356906501 | 0.051422198 |
| RESPIRATORY CHAIN                                                  | 71   | -0.206652078 | 0.023358637 |
| U4 U6 X U5 TRI SNRNP COMPLEX                                       | 21   | 0.080531169  | 0.656606525 |
| PRP19 COMPLEX                                                      | 12   | 0.010741207  | 0.963817325 |
| CONDENSED CHROMOSOME CENTROMERIC REGION                            | 98   | -0.200338917 | 0.010236597 |
| TRICARBOXYLIC ACID CYCLE ENZYME COMPLEX                            | 11   | -0.249301676 | 0.27027014  |
| STAGA COMPLEX                                                      | 14   | -0.143392813 | 0.494000873 |
| SPERM MIDPIECE                                                     | 9    | -0.214738462 | 0.400569568 |
| SECRETORY GRANULE MEMBRANE                                         | 63   | 0.126653222  | 0.228051068 |
| DNA PACKAGING COMPLEX                                              | 92   | 0.069271328  | 0.423662842 |
| POLE PLASM                                                         | 12   | 0.13764331   | 0.565767686 |
| MEMBRANE MICRODOMAIN                                               | 246  | -0.090813719 | 0.077579729 |
| TRANSPORTER COMPLEX                                                | 237  | 0.072022476  | 0.18417821  |
| SIDE OF MEMBRANE                                                   | 331  | -0.012226806 | 0.787444125 |
| PHOTORECEPTOR CONNECTING CILIUM                                    | 22   | -0.09087556  | 0.593148858 |
| CONDENSED CHROMOSOME OUTER KINETOCHORE                             | 12   | -0.150678091 | 0.505095927 |
| CLATHRIN COATED VESICLE MEMBRANE                                   | 68   | 0.139503724  | 0.169298948 |
| MEMBRANE PROTEIN COMPLEX                                           | 865  | -0.029421732 | 0.301581385 |
| INTRINSIC COMPONENT OF THE CYTOPLASMIC SIDE OF THE PLASMA MEMBRANE | 12   | -0.105269183 | 0.645981117 |
| NUCLEAR OUTER MEMBRANE ENDOPLASMIC RETICULUM MEMBRANE NETWORK      | 867  | -0.075214556 | 0.007610014 |
| TRANSCRIPTIONALLY ACTIVE CHROMATIN                                 | 18   | 0.096255395  | 0.623398234 |
| U2 TYPE PRESPLICEOSOME                                             | 16   | -0.408969198 | 0.020794994 |
| ENDOPLASMIC RETICULUM CHAPERONE COMPLEX                            | 11   | -0.255955197 | 0.26752236  |
| SCHMIDT LANTERMAN INCISURE                                         | 9    | -0.108946178 | 0.680535581 |
| SEMAPHORIN RECEPTOR COMPLEX                                        | 11   | 0.347087559  | 0.153178042 |
| AXON CYTOPLASM                                                     | 32   | 0.014610374  | 0.919856316 |
| LAMELLIPODIUM                                                      | 163  | -0.038860461 | 0.542784394 |
| NUCLEAR TRANSCRIPTION FACTOR COMPLEX                               | 116  | -0.135774534 | 0.064399179 |
| MIDBODY                                                            | 123  | -0.072701221 | 0.317878828 |
| HETEROCHROMATIN                                                    | 64   | -0.09041084  | 0.366971923 |
| DNA HELICASE COMPLEX                                               | 14   | 0.157785529  | 0.477945209 |
| CHROMOCENTER                                                       | 12   | -0.630641605 | 0.000793487 |
| SPLICEOSOMAL COMPLEX                                               | 164  | -0.141295536 | 0.022432641 |
| NADH DEHYDROGENASE COMPLEX                                         | 41   | -0.069961732 | 0.577640469 |
| SARCOPLASM                                                         | 57   | -0.082930538 | 0.435093785 |
| DNA DIRECTED RNA POLYMERASE II CORE COMPLEX                        | 17   | -0.084952219 | 0.661786399 |
| CELL CELL JUNCTION                                                 | 323  | -0.101152107 | 0.024236293 |
| CONDENSED NUCLEAR CHROMOSOME CENTROMERIC REGION                    | 15   | -0.549627483 | 0.001615612 |
| PHOSPHATIDYLINOSITOL 3 KINASE COMPLEX                              | 19   | 0.111780345  | 0.558222204 |
| INTRACILIARY TRANSPORT PARTICLE B                                  | 15   | -0.104859672 | 0.60890485  |
| DNA DIRECTED RNA POLYMERASE I COMPLEX                              | 13   | 0.169633408  | 0.463138151 |
| REPLICATION FORK                                                   | 59   | 0.028449179  | 0.790952051 |
| IMMUNOGLOBULIN COMPLEX                                             | 3    | 0.226914725  | 0.631143804 |
| SMALL NUCLEOLAR RIBONUCLEOPROTEIN COMPLEX                          | 18   | -0.377843195 | 0.022029284 |
| SMN SM PROTEIN COMPLEX                                             | 17   | -0.153550645 | 0.415830265 |
| RECEPTOR COMPLEX                                                   | 261  | 0.070275759  | 0.174288704 |

|                                                               |     |              |             |
|---------------------------------------------------------------|-----|--------------|-------------|
| INTRACILIARY TRANSPORT PARTICLE                               | 24  | -0.117794627 | 0.465433741 |
| ANCHORING JUNCTION                                            | 466 | -0.126142079 | 0.000742484 |
| PRERIBOSOME LARGE SUBUNIT PRECURSOR                           | 20  | -0.263498098 | 0.121844496 |
| ENDOPLASMIC RETICULUM GOLGI INTERMEDIATE COMPARTMENT MEMBRANE | 57  | -0.11549046  | 0.272498247 |
| EXTRINSIC COMPONENT OF CYTOPLASMIC SIDE OF PLASMA MEMBRANE    | 84  | 0.013597209  | 0.879593567 |
| GAMMA TUBULIN COMPLEX                                         | 17  | -0.16581536  | 0.380622058 |
| POLYSOME                                                      | 41  | 0.061501407  | 0.634845114 |
| PRESYNAPTIC ACTIVE ZONE                                       | 26  | 0.016787295  | 0.917022898 |
| EXOCYST                                                       | 14  | 0.041273473  | 0.851490559 |
| DNA DIRECTED RNA POLYMERASE III COMPLEX                       | 18  | -0.041346699 | 0.828672129 |
| PODOSOME                                                      | 22  | 0.019131378  | 0.913070027 |
| CILIARY BASE                                                  | 20  | -0.20289756  | 0.236436292 |
| AUTOPHAGOSOME MEMBRANE                                        | 25  | -0.037478601 | 0.817442288 |
| INTRINSIC COMPONENT OF MITOCHONDRIAL INNER MEMBRANE           | 22  | -0.034127181 | 0.843713837 |
| DYNEIN COMPLEX                                                | 32  | 0.250092303  | 0.086760719 |
| ORGANELAR LARGE RIBOSOMAL SUBUNIT                             | 29  | -0.240493537 | 0.086245762 |
| CARBOXY TERMINAL DOMAIN PROTEIN KINASE COMPLEX                | 21  | -0.188183091 | 0.264389393 |
| DESMOSOME                                                     | 21  | -0.08507943  | 0.627085778 |
| RECYCLING ENDOSOME MEMBRANE                                   | 37  | -0.000785088 | 0.995347051 |
| ORGANELLE ENVELOPE LUMEN                                      | 77  | -0.134985318 | 0.134042678 |
| SPINDLE MICROTUBULE                                           | 54  | -0.157518839 | 0.140634502 |
| GOLGI TRANSPORT COMPLEX                                       | 12  | -0.020349372 | 0.931034374 |
| OUTER MEMBRANE                                                | 168 | -0.078619131 | 0.206846958 |
| RIBOSOMAL SUBUNIT                                             | 155 | -0.234619926 | 0.000136864 |
| CIS GOLGI NETWORK                                             | 38  | 0.068201884  | 0.612413967 |
| TRANS GOLGI NETWORK TRANSPORT VESICLE                         | 26  | 0.090231328  | 0.581157335 |
| INHIBITORY SYNAPSE                                            | 10  | 0.083233843  | 0.75091803  |
| MICROTUBULE END                                               | 22  | 0.26705714   | 0.133577835 |
| SUPRAMOLECULAR FIBER                                          | 505 | -0.009897969 | 0.788799597 |
| FIBRIL                                                        | 12  | 0.054390193  | 0.819596821 |
| NONMOTILE PRIMARY CILIUM                                      | 93  | -0.07573961  | 0.364066952 |
| NUCLEAR MATRIX                                                | 89  | -0.143510481 | 0.086192352 |
| AXOLEMMA                                                      | 14  | 0.188586337  | 0.402559506 |
| MICROTUBULE ASSOCIATED COMPLEX                                | 118 | -0.033222149 | 0.657943487 |
| APICAL PLASMA MEMBRANE                                        | 236 | -0.030767288 | 0.563811343 |
| PHAGOCYTIC VESICLE MEMBRANE                                   | 51  | -0.076611094 | 0.496453428 |
| PHOTORECEPTOR INNER SEGMENT                                   | 23  | 0.314502052  | 0.063275921 |
| EUCHROMATIN                                                   | 28  | 0.176249346  | 0.263550341 |
| CELL CORTEX                                                   | 211 | -0.07851988  | 0.158039343 |
| DNA DIRECTED RNA POLYMERASE II HOLOENZYME                     | 94  | -0.129477541 | 0.112788044 |
| ENDOPLASMIC RETICULUM QUALITY CONTROL COMPARTMENT             | 12  | -0.598404705 | 0.002079579 |
| INTRINSIC COMPONENT OF MITOCHONDRIAL MEMBRANE                 | 49  | -0.054317516 | 0.638077563 |
| LATERAL ELEMENT                                               | 9   | 0.131303551  | 0.63589268  |
| CYTOPLASMIC VESICLE PART                                      | 514 | 0.042425106  | 0.251675858 |
| INTERMEDIATE FILAMENT CYTOSKELETON                            | 138 | 0.145060484  | 0.042069986 |
| ENDOSOMAL PART                                                | 388 | 0.030847874  | 0.46613695  |
| ACROSOMAL VESICLE                                             | 64  | 0.149479576  | 0.152397911 |
| PSEUDOPODIUM                                                  | 14  | -0.115053083 | 0.589028786 |
| T TUBULE                                                      | 39  | 0.047764434  | 0.718196733 |
| ENDOPLASMIC RETICULUM GOLGI INTERMEDIATE COMPARTMENT          | 95  | -0.189478972 | 0.017594163 |
| PLASMA MEMBRANE REGION                                        | 744 | -0.011667062 | 0.703794849 |
| NEURON PROJECTION MEMBRANE                                    | 30  | -0.084813986 | 0.562427292 |
| INTEGRATOR COMPLEX                                            | 13  | -0.12720061  | 0.561185818 |
| SARCOLEMMA                                                    | 106 | -0.051160273 | 0.516055674 |
| IKAPPAB KINASE COMPLEX                                        | 9   | -0.00611302  | 0.982095308 |
| CELL BODY                                                     | 416 | 0.04161665   | 0.310020756 |
| LYTIC VACUOLE                                                 | 453 | -0.106130075 | 0.00530212  |
| CUL4 RING E3 UBIQUITIN LIGASE COMPLEX                         | 24  | -0.430473653 | 0.002672077 |
| CONDENSED CHROMOSOME                                          | 181 | -0.137151606 | 0.02003004  |
| ESC E Z COMPLEX                                               | 16  | -0.412159595 | 0.023076223 |
| NUCLEAR PERIPHERY                                             | 112 | -0.13231682  | 0.07733754  |
| CULLIN RING UBIQUITIN LIGASE COMPLEX                          | 134 | -0.014223407 | 0.840698395 |
| MAIN AXON                                                     | 50  | 0.088572896  | 0.451535186 |
| LAMELLAR BODY                                                 | 17  | 0.393294303  | 0.055769347 |
| CHROMATOID BODY                                               | 13  | -0.159051403 | 0.4648362   |
| CHROMOSOME TELOMERIC REGION                                   | 154 | -0.035118127 | 0.593149004 |

|                                                         |      |              |             |
|---------------------------------------------------------|------|--------------|-------------|
| TOR COMPLEX                                             | 13   | -0.143060871 | 0.510558355 |
| WNT SIGNALOSOME                                         | 10   | -0.027050923 | 0.916220146 |
| ACTIN BASED CELL PROJECTION                             | 148  | -0.001958649 | 0.976866532 |
| CELL PROJECTION                                         | 1487 | 0.011624154  | 0.603598652 |
| REPLISOME                                               | 26   | 0.308371437  | 0.058623251 |
| CILIARY MEMBRANE                                        | 52   | 0.182602839  | 0.113449665 |
| COATED VESICLE                                          | 209  | -0.108194996 | 0.051313398 |
| INTERCELLULAR BRIDGE                                    | 40   | -0.004707577 | 0.970975035 |
| CELL PROJECTION PART                                    | 791  | -0.014008904 | 0.638243555 |
| MHC CLASS II PROTEIN COMPLEX                            | 12   | -0.022995829 | 0.9220373   |
| KERATIN FILAMENT                                        | 41   | 0.221445326  | 0.086786046 |
| RNAI EFFECTOR COMPLEX                                   | 11   | -0.25218708  | 0.2651787   |
| PRESYNAPSE                                              | 241  | 0.096094777  | 0.075045869 |
| A BAND                                                  | 27   | 0.126390073  | 0.429934954 |
| NEUROMUSCULAR JUNCTION                                  | 46   | -0.012025701 | 0.92048873  |
| SOMATODENDRITIC COMPARTMENT                             | 552  | -0.006289138 | 0.859095209 |
| PRE AUTOPHAGOSOMAL STRUCTURE MEMBRANE                   | 16   | 0.351902272  | 0.090525421 |
| EXTERNAL SIDE OF PLASMA MEMBRANE                        | 164  | 0.052989773  | 0.414118909 |
| LYTIC VACUOLE MEMBRANE                                  | 251  | -0.100736683 | 0.04740496  |
| CUL3 RING UBIQUITIN LIGASE COMPLEX                      | 54   | 0.291996792  | 0.011669346 |
| ENVELOPE                                                | 985  | -0.133864243 | 3.39E-07    |
| PRIMARY CILIUM                                          | 153  | -0.010619736 | 0.87277461  |
| RUFFLE                                                  | 142  | -0.112149303 | 0.09425783  |
| WASH COMPLEX                                            | 10   | 0.142041304  | 0.589442428 |
| DENDRITE CYTOPLASM                                      | 14   | 0.108958651  | 0.623481261 |
| CORNIFIED ENVELOPE                                      | 20   | 0.23036385   | 0.210665062 |
| PERIKARYON                                              | 85   | 0.108206999  | 0.231423041 |
| MICROBODY PART                                          | 79   | 0.038548449  | 0.678385485 |
| GOLGI APPARATUS                                         | 1271 | -0.01438463  | 0.547498124 |
| NUCLEOLUS                                               | 793  | -0.08434752  | 0.004033555 |
| PERICENTRIOLAR MATERIAL                                 | 16   | -0.26505006  | 0.153658407 |
| TELOMERE CAP COMPLEX                                    | 12   | -0.399071627 | 0.048011117 |
| NUCLEOTIDE EXCISION REPAIR COMPLEX                      | 13   | 0.081922935  | 0.721994531 |
| NUCLEAR PORE                                            | 74   | -0.257334199 | 0.003978839 |
| AP TYPE MEMBRANE COAT ADAPTOR COMPLEX                   | 39   | -0.070104715 | 0.586512201 |
| BAF TYPE COMPLEX                                        | 21   | -0.116918196 | 0.502194748 |
| MYOSIN II COMPLEX                                       | 19   | 0.162158521  | 0.394859864 |
| MICROTUBULE ORGANIZING CENTER PART                      | 131  | -0.100319719 | 0.151608919 |
| NUCLEAR MEMBRANE                                        | 255  | -0.141972075 | 0.004435219 |
| SWI SNF COMPLEX                                         | 13   | -0.049877944 | 0.824208472 |
| CYTOPLASMIC MICROTUBULE                                 | 49   | -0.087603977 | 0.443780065 |
| CLATHRIN COAT OF ENDOCYTIC VESICLE                      | 11   | 0.497814556  | 0.03176074  |
| HOST                                                    | 11   | 0.000410755  | 0.998671832 |
| PIGMENT GRANULE                                         | 94   | 0.008979656  | 0.91566627  |
| EXTRINSIC COMPONENT OF MEMBRANE                         | 217  | 0.016673457  | 0.766413158 |
| SPINDLE                                                 | 267  | -0.079380615 | 0.109286903 |
| TRANSPORT VESICLE                                       | 297  | 0.028916741  | 0.548710555 |
| TRANSCRIPTION ELONGATION FACTOR COMPLEX                 | 42   | 0.039630578  | 0.755794857 |
| ACTIN FILAMENT                                          | 65   | -0.057817179 | 0.564303196 |
| INTRINSIC COMPONENT OF EXTERNAL SIDE OF PLASMA MEMBRANE | 14   | -0.017680051 | 0.93532279  |
| CILIARY PLASM                                           | 62   | 0.031209154  | 0.765738511 |
| SPERM FLAGELLUM                                         | 38   | 0.173520684  | 0.206004528 |
| GOLGI LUMEN                                             | 68   | 0.042601418  | 0.670777299 |
| ESCRT III COMPLEX                                       | 11   | 0.144920092  | 0.566404415 |
| COHESIN COMPLEX                                         | 9    | -0.347071434 | 0.144907811 |
| MITOCHONDRIAL ENVELOPE                                  | 622  | -0.126389814 | 0.000101572 |
| RIBONUCLEOPROTEIN COMPLEX                               | 678  | -0.148293464 | 1.88E-06    |
| CELL LEADING EDGE                                       | 324  | -0.0308562   | 0.4989315   |
| CLATHRIN COATED ENDOCYTIC VESICLE MEMBRANE              | 38   | 0.15842212   | 0.244020857 |
| ENDOPLASMIC RETICULUM                                   | 1384 | -0.043746356 | 0.056014822 |
| CALCIUM CHANNEL COMPLEX                                 | 51   | 0.066779315  | 0.565174126 |
| TRANSLATION PREINITIATION COMPLEX                       | 15   | -0.431678899 | 0.027645231 |
| MITOCHONDRIAL PROTEIN COMPLEX                           | 125  | -0.168352888 | 0.015899403 |
| MICROTUBULE ORGANIZING CENTER                           | 566  | -0.045135789 | 0.19349617  |
| PROTON TRANSPORTING V TYPE ATPASE COMPLEX               | 21   | 0.057440677  | 0.750299777 |
| PROTEIN LIPID COMPLEX                                   | 27   | 0.352013888  | 0.025075096 |

|                                                    |     |              |             |
|----------------------------------------------------|-----|--------------|-------------|
| MEMBRANE REGION                                    | 928 | -0.006951136 | 0.801726018 |
| NBAF COMPLEX                                       | 13  | 0.277492981  | 0.236113793 |
| MEDIATOR COMPLEX                                   | 33  | -0.05464367  | 0.697761946 |
| CILIUM                                             | 353 | -0.006841484 | 0.876419956 |
| EXTRINSIC COMPONENT OF PLASMA MEMBRANE             | 116 | 0.021685023  | 0.777066059 |
| AXON PART                                          | 193 | 0.086406214  | 0.151000472 |
| BRUSH BORDER MEMBRANE                              | 44  | -0.002756078 | 0.982185316 |
| TERMINAL BOUTON                                    | 56  | 0.049916161  | 0.651719135 |
| ANCHORED COMPONENT OF PLASMA MEMBRANE              | 23  | -0.105753316 | 0.524568278 |
| AXONEMAL DYNEIN COMPLEX                            | 7   | 0.154085294  | 0.623725863 |
| MAST CELL GRANULE                                  | 17  | -0.311069979 | 0.085206202 |
| RECYCLING ENDOSOME                                 | 114 | 0.051534265  | 0.507160931 |
| COATED MEMBRANE                                    | 84  | 0.022840272  | 0.799506882 |
| SYNAPSE PART                                       | 516 | -0.006117351 | 0.867249806 |
| EARLY ENDOSOME                                     | 268 | 0.047790055  | 0.347684873 |
| PROTEASOME ACCESSORY COMPLEX                       | 22  | -0.314347452 | 0.042182377 |
| CYTOSOLIC RIBOSOME                                 | 107 | -0.207149294 | 0.00556146  |
| PHOTORECEPTOR DISC MEMBRANE                        | 9   | 0.201400417  | 0.466546556 |
| PROTEIN PHOSPHATASE TYPE 2A COMPLEX                | 19  | -0.088015354 | 0.632049833 |
| CILIARY BASAL BODY                                 | 71  | -0.000734411 | 0.993977453 |
| TRANS GOLGI NETWORK MEMBRANE                       | 74  | 0.18907639   | 0.052355981 |
| ENDOSOME                                           | 714 | -0.00588412  | 0.851014482 |
| TRANSPORT VESICLE MEMBRANE                         | 130 | -0.021795175 | 0.761178632 |
| NEURONAL CELL BODY MEMBRANE                        | 15  | 0.281358033  | 0.1916741   |
| HISTONE DEACETYLASE COMPLEX                        | 58  | -0.072994419 | 0.489969198 |
| PHOTORECEPTOR OUTER SEGMENT                        | 42  | 0.087630468  | 0.494291318 |
| U12 TYPE SPLICEOSOMAL COMPLEX                      | 25  | -0.165261518 | 0.286194261 |
| BASAL PART OF CELL                                 | 44  | 0.016034464  | 0.897042696 |
| SODIUM POTASSIUM EXCHANGING ATPASE COMPLEX         | 8   | 0.05881124   | 0.840686907 |
| SITE OF DOUBLE STRAND BREAK                        | 29  | 0.316010711  | 0.048560407 |
| PLASMA MEMBRANE RAFT                               | 74  | -0.167333281 | 0.066392265 |
| MICROBODY LUMEN                                    | 37  | 0.101208861  | 0.45851204  |
| FILAMENTOUS ACTIN                                  | 19  | -0.146471256 | 0.416472236 |
| METHYLOSOME                                        | 12  | 0.027920731  | 0.906427744 |
| GOLGI CISTERNA MEMBRANE                            | 66  | -0.159944522 | 0.09800258  |
| PROTON TRANSPORTING ATP SYNTHASE COMPLEX           | 20  | -0.380634816 | 0.016005684 |
| PLASMA MEMBRANE PROTEIN COMPLEX                    | 402 | 0.0340371    | 0.413556186 |
| CENTRIOLAR SATELLITE                               | 21  | -0.285693892 | 0.075034632 |
| CLATHRIN ADAPTOR COMPLEX                           | 26  | -0.150563162 | 0.328468021 |
| GAP JUNCTION                                       | 22  | 0.00616682   | 0.971850655 |
| DERLIN 1 RETROTRANSLOCATION COMPLEX                | 10  | -0.049961229 | 0.845366744 |
| PLATELET DENSE GRANULE                             | 16  | 0.011806084  | 0.954101284 |
| DENSE CORE GRANULE                                 | 13  | -0.207568563 | 0.32796828  |
| SYNAPTIC MEMBRANE                                  | 211 | -0.08206618  | 0.139743062 |
| EXOCYTIC VESICLE MEMBRANE                          | 49  | 0.228050956  | 0.056755557 |
| ACETYLTRANSFERASE COMPLEX                          | 95  | -0.002391347 | 0.977329008 |
| ANCHORED COMPONENT OF MEMBRANE                     | 95  | 0.084127018  | 0.324377489 |
| MHC CLASS I PROTEIN COMPLEX                        | 10  | -0.532035478 | 0.011564034 |
| DENDRITE                                           | 385 | -0.018840635 | 0.654223227 |
| NUCLEAR UBIQUITIN LIGASE COMPLEX                   | 40  | 0.020347394  | 0.875675608 |
| ORGANELLE SUBCOMPARTMENT                           | 287 | -0.015528434 | 0.749291653 |
| CLATHRIN COAT OF TRANS GOLGI NETWORK VESICLE       | 10  | 0.140767113  | 0.594711231 |
| CHYLOMICRON                                        | 9   | 0.259026599  | 0.341843029 |
| PRIMARY LYSOSOME                                   | 12  | -0.07119145  | 0.758968852 |
| TRIGLYCERIDE RICH LIPOPROTEIN PARTICLE             | 15  | 0.263084851  | 0.215766829 |
| ENDOPLASMIC RETICULUM SUBCOMPARTMENT               | 15  | 0.149723512  | 0.488656239 |
| COLLAGEN TRIMER                                    | 61  | 0.072189808  | 0.497242173 |
| SMALL NUCLEAR RIBONUCLEOPROTEIN COMPLEX            | 60  | -0.232410306 | 0.018087423 |
| CYCLIN DEPENDENT PROTEIN KINASE HOLOENZYME COMPLEX | 30  | -0.408516434 | 0.001965714 |
| VACUOLAR MEMBRANE                                  | 534 | -0.007241856 | 0.840524638 |

**Table S4.** miRNA GO molecular function.

| GO Term                                                      | Genes Tested | Model Coefficient | p-value     |
|--------------------------------------------------------------|--------------|-------------------|-------------|
| CYCLIC NUCLEOTIDE PHOSPHODIESTERASE ACTIVITY                 | 22           | 0.14930253        | 0.400724189 |
| PROTEIN SERINE THREONINE TYROSINE KINASE ACTIVITY            | 37           | 0.053682046       | 0.693220938 |
| HYDROLASE ACTIVITY ACTING ON CARBON NITROGEN BUT NOT PEPTIDE | 28           | 0.168171412       | 0.288030746 |
| BONDS IN CYCLIC AMIDINES                                     | 12           | -0.328097674      | 0.11059667  |
| 5 3 EXONUCLEASE ACTIVITY                                     | 39           | 0.020535641       | 0.87612819  |
| POLYUBIQUITIN BINDING                                        | 20           | 0.112019616       | 0.546996654 |
| COFACTOR TRANSPORTER ACTIVITY                                | 77           | 0.055750675       | 0.554922861 |
| BETA CATENIN BINDING                                         | 25           | -0.227619444      | 0.138586213 |
| UDP GALACTOSYLTRANSFERASE ACTIVITY                           | 22           | -0.237460672      | 0.141500332 |
| MITOGEN ACTIVATED PROTEIN KINASE BINDING                     | 27           | -0.263664378      | 0.06848877  |
| PHOSPHATE TRANSMEMBRANE TRANSPORTER ACTIVITY                 | 461          | -0.054600958      | 0.153198267 |
| PEPTIDASE ACTIVITY                                           | 12           | 0.135274282       | 0.572084354 |
| IMMUNOGLOBULIN BINDING                                       | 14           | -0.41903431       | 0.026162421 |
| PROTEIN KINASE A REGULATORY SUBUNIT BINDING                  | 1040         | 0.086422515       | 0.001195852 |
| SIGNAL TRANSDUCER ACTIVITY                                   | 17           | 0.144758793       | 0.475874409 |
| MHC PROTEIN COMPLEX BINDING                                  | 22           | -0.076677369      | 0.653951989 |
| IONOTROPIC GLUTAMATE RECEPTOR BINDING                        | 383          | 0.002428849       | 0.954276588 |
| UBIQUITIN LIKE PROTEIN TRANSFERASE ACTIVITY                  | 66           | 0.094698525       | 0.355538118 |
| TRANSMEMBRANE RECEPTOR PROTEIN KINASE ACTIVITY               | 69           | 0.165135487       | 0.101486793 |
| SMAD BINDING                                                 | 17           | -0.014028698      | 0.94348673  |
| SYNTAXIN 1 BINDING                                           | 11           | -0.094097542      | 0.695522227 |
| LONG CHAIN FATTY ACID BINDING                                | 29           | 0.050339754       | 0.742891961 |
| ACETYL GALACTOSAMINYLTRANSFERASE ACTIVITY                    | 32           | 0.013491212       | 0.925957421 |
| OXIDOREDUCTASE ACTIVITY ACTING ON THE ALDEHYDE OR OXO GROUP  | 133          | -0.032896803      | 0.641756145 |
| OF DONORS NAD OR NADP AS ACCEPTOR                            | 78           | 0.134525675       | 0.155809427 |
| ACTIVE ION TRANSMEMBRANE TRANSPORTER ACTIVITY                | 13           | 0.00511808        | 0.982029853 |
| CYTOKINE BINDING                                             | 48           | 0.266792699       | 0.023700366 |
| NEUROTRANSMITTER BINDING                                     | 14           | -0.247577642      | 0.217114061 |
| OLFACTORY RECEPTOR ACTIVITY                                  | 15           | 0.124035197       | 0.56416505  |
| SERINE TYPE EXOPEPTIDASE ACTIVITY                            | 136          | 0.256638848       | 0.000323999 |
| 3 5 CYCLIC AMP PHOSPHODIESTERASE ACTIVITY                    | 19           | -0.339987294      | 0.038718628 |
| VOLTAGE GATED ION CHANNEL ACTIVITY                           | 44           | -0.104738273      | 0.383971381 |
| PHOSPHATIDYLINOSITOL 3 5 BISPHOSPHATE BINDING                | 8            | -0.300314909      | 0.251625602 |
| PROTEIN KINASE C BINDING                                     | 62           | 0.047437969       | 0.651624021 |
| BETA 2 MICROGLOBULIN BINDING                                 | 84           | -0.082925999      | 0.344052786 |
| PROTEIN COMPLEX SCAFFOLD                                     | 53           | -0.155717606      | 0.14922201  |
| HEAT SHOCK PROTEIN BINDING                                   | 217          | 0.071249571       | 0.208936291 |
| PHOSPHOPROTEIN BINDING                                       | 86           | -0.130027994      | 0.12753779  |
| GTPASE ACTIVITY                                              | 50           | -0.020648538      | 0.857912012 |
| AMINO ACID BINDING                                           | 21           | -0.272948267      | 0.08984041  |
| OXIDOREDUCTASE ACTIVITY ACTING ON THE CH CH GROUP OF DONORS  | 16           | -0.040159225      | 0.842904067 |
| OXIDOREDUCTASE ACTIVITY ACTING ON A HEME GROUP OF DONORS     | 19           | -0.069954522      | 0.70470369  |
| QUINONE BINDING                                              | 16           | 0.083076427       | 0.689302012 |
| G PROTEIN ALPHA SUBUNIT BINDING                              | 157          | 0.047205747       | 0.475808667 |
| MITOGEN ACTIVATED PROTEIN KINASE KINASE BINDING              | 713          | -0.04885655       | 0.115845859 |
| PEPTIDASE REGULATOR ACTIVITY                                 | 22           | -0.179519951      | 0.278095295 |
| CYTOSKELETAL PROTEIN BINDING                                 | 56           | -0.001250556      | 0.990886834 |
| VITAMIN TRANSPORTER ACTIVITY                                 | 15           | 0.265484536       | 0.20752608  |
| TRANSFERASE ACTIVITY TRANSFERRING SULFUR CONTAINING GROUPS   | 38           | -0.201160801      | 0.107209619 |
| CYCLASE ACTIVITY                                             | 141          | -0.079174059      | 0.243670145 |
| PROTEIN SELF ASSOCIATION                                     | 87           | 0.36117929        | 3.14E-05    |
| PROTEIN SELF ASSOCIATION                                     | 10           | -0.318052086      | 0.163253276 |
| CYSTEINE TYPE PEPTIDASE ACTIVITY                             | 20           | -0.22071786       | 0.193893402 |
| LIPID TRANSPORTER ACTIVITY                                   | 32           | -0.137732595      | 0.322198128 |
| ENDODEOXYRIBONUCLEASE ACTIVITY PRODUCING 5                   | 161          | 0.021541065       | 0.740729804 |
| PHOSPHOMONOESTERS                                            | 116          | 0.039064709       | 0.611216932 |
| SULFUR COMPOUND TRANSMEMBRANE TRANSPORTER ACTIVITY           | 19           | 0.113696348       | 0.551760395 |
| DNA POLYMERASE ACTIVITY                                      | 42           | -0.053962758      | 0.66532731  |
| HISTONE BINDING                                              | 7            | 0.086745894       | 0.781844017 |
| UBIQUITIN LIKE PROTEIN BINDING                               | 10           | 0.342492849       | 0.176768446 |
| DNA BINDING BENDING                                          |              |                   |             |
| RNA METHYLTRANSFERASE ACTIVITY                               |              |                   |             |
| CYCLIC NUCLEOTIDE GATED ION CHANNEL ACTIVITY                 |              |                   |             |
| NARROW PORE CHANNEL ACTIVITY                                 |              |                   |             |

|                                                                |     |              |             |
|----------------------------------------------------------------|-----|--------------|-------------|
| STEROID DEHYDROGENASE ACTIVITY                                 | 21  | 0.237740183  | 0.186951974 |
| BHLH TRANSCRIPTION FACTOR BINDING                              | 25  | 0.131299936  | 0.431326992 |
| G PROTEIN COUPLED NEUROTRANSMITTER RECEPTOR ACTIVITY           | 9   | 0.29231595   | 0.275425704 |
| METHYLATED HISTONE BINDING                                     | 45  | -0.128883145 | 0.274113225 |
| ATP DEPENDENT DNA HELICASE ACTIVITY                            | 30  | -0.048246119 | 0.74420797  |
| PURINE NTP DEPENDENT HELICASE ACTIVITY                         | 89  | -0.059482847 | 0.487878213 |
| PROTEIN BINDING INVOLVED IN CELL ADHESION                      | 15  | -0.162058898 | 0.421609718 |
| FIBROBLAST GROWTH FACTOR RECEPTOR BINDING                      | 22  | 0.098786424  | 0.57674861  |
| VOLTAGE GATED ANION CHANNEL ACTIVITY                           | 12  | 0.578537998  | 0.005101267 |
| RNA POLYMERASE II TRANSCRIPTION COREPRESSOR ACTIVITY           | 23  | 0.211293308  | 0.22892623  |
| PHOSPHATASE INHIBITOR ACTIVITY                                 | 29  | -0.154639407 | 0.28704779  |
| MAGNESIUM ION BINDING                                          | 179 | 0.114956121  | 0.066813794 |
| DNA SECONDARY STRUCTURE BINDING                                | 22  | -0.204219063 | 0.212933129 |
| SULFUR COMPOUND BINDING                                        | 193 | 0.084352116  | 0.160382299 |
| SIGNAL SEQUENCE BINDING                                        | 36  | -0.247217945 | 0.051649819 |
| OXIDOREDUCTASE ACTIVITY ACTING ON THE CH OH GROUP OF DONORS    |     |              |             |
| NAD OR NADP AS ACCEPTOR                                        | 90  | 0.120806368  | 0.169441637 |
| SYNTAXIN BINDING                                               | 79  | 0.012651499  | 0.891236685 |
| HEPARAN SULFATE SULFOTRANSFERASE ACTIVITY                      | 12  | -0.122723795 | 0.5904955   |
| PHOSPHATIDYLINOSITOL PHOSPHATE PHOSPHATASE ACTIVITY            | 27  | -0.047267364 | 0.761564453 |
| CARBOHYDRATE BINDING                                           | 202 | 0.125167971  | 0.033763551 |
| TAU PROTEIN BINDING                                            | 9   | 0.083960181  | 0.762360208 |
| ACYLGLYCEROL O ACYLTRANSFERASE ACTIVITY                        | 25  | -0.084163887 | 0.5995595   |
| COMPLEMENT BINDING                                             | 12  | -0.065329912 | 0.778503156 |
| HORMONE RECEPTOR BINDING                                       | 143 | -0.145344119 | 0.028317891 |
| DIVALENT INORGANIC CATION TRANSMEMBRANE TRANSPORTER            |     |              |             |
| ACTIVITY                                                       | 138 | 0.06792258   | 0.337583103 |
| PROTEIN HETERODIMERIZATION ACTIVITY                            | 398 | 0.060697862  | 0.148577844 |
| PROTEIN PHOSPHATASE BINDING                                    | 110 | 0.116322264  | 0.145513648 |
| MONOVALENT INORGANIC CATION TRANSMEMBRANE TRANSPORTER          |     |              |             |
| ACTIVITY                                                       | 265 | 0.032056212  | 0.52975677  |
| 3 5 CYCLIC GMP PHOSPHODIESTERASE ACTIVITY                      | 11  | 0.122005315  | 0.626069495 |
| VOLTAGE GATED CATION CHANNEL ACTIVITY                          | 96  | 0.251709982  | 0.003025301 |
| PROTEIN TYROSINE KINASE ACTIVITY                               | 146 | 0.022766924  | 0.739059146 |
| TRANSMITTER GATED CHANNEL ACTIVITY                             | 19  | -0.039657425 | 0.831124896 |
| PROTEIN DEACETYLASE ACTIVITY                                   | 41  | -0.100180124 | 0.421630092 |
| ENDONUCLEASE ACTIVITY ACTIVE WITH EITHER RIBO OR               |     |              |             |
| DEOXYRIBONUCLEIC ACIDS AND PRODUCING 3 PHOSPHOMONOESTERS       | 15  | -0.021785715 | 0.917474256 |
| SODIUM AMINO ACID SYMPORTER ACTIVITY                           | 9   | 0.087296701  | 0.752909464 |
| FATTY ACYL COA BINDING                                         | 26  | 0.161765321  | 0.321917562 |
| PHOSPHATIDYLINOSITOL 3 5 BISPHTHOSPHATE 3 PHOSPHATASE ACTIVITY | 10  | -0.084174642 | 0.739446015 |
| TRANSCRIPTIONAL ACTIVATOR ACTIVITY RNA POLYMERASE II DISTAL    |     |              |             |
| ENHANCER SEQUENCE SPECIFIC BINDING                             | 21  | -0.460685365 | 0.003694263 |
| CYCLIN BINDING                                                 | 18  | -0.102715045 | 0.584878812 |
| ACID AMINO ACID LIGASE ACTIVITY                                | 18  | -0.096751414 | 0.606854357 |
| OXIDOREDUCTASE ACTIVITY ACTING ON NAD P H                      | 81  | -0.1411875   | 0.106734402 |
| CORE PROMOTER BINDING                                          | 140 | -0.058483496 | 0.39339549  |
| NEUROPEPTIDE RECEPTOR BINDING                                  | 22  | 0.160726975  | 0.363808731 |
| RETINOIC ACID BINDING                                          | 13  | 0.294515964  | 0.202838522 |
| DIACYLGLYCEROL KINASE ACTIVITY                                 | 10  | 0.463418586  | 0.053935016 |
| STEROID BINDING                                                | 74  | 0.269336327  | 0.005061859 |
| LEUCINE ZIPPER DOMAIN BINDING                                  | 10  | 0.206295518  | 0.436584206 |
| PHOSPHATIDYLINOSITOL 5 PHOSPHATE BINDING                       | 11  | -0.300621058 | 0.17285474  |
| I SMAD BINDING                                                 | 11  | 0.316396145  | 0.207489369 |
| ENHANCER BINDING                                               | 80  | -0.261698765 | 0.002006029 |
| DEMETHYLASE ACTIVITY                                           | 32  | 0.050990156  | 0.727456598 |
| RAC GUANYL NUCLEOTIDE EXCHANGE FACTOR ACTIVITY                 | 12  | -0.298769841 | 0.161317283 |
| PROTEIN BINDING INVOLVED IN PROTEIN FOLDING                    | 11  | -0.147924147 | 0.530330158 |
| KINASE INHIBITOR ACTIVITY                                      | 80  | -0.115976963 | 0.192052833 |
| PHOTORECEPTOR ACTIVITY                                         | 8   | -0.1592575   | 0.561921138 |
| CYTOSKELETAL ADAPTOR ACTIVITY                                  | 14  | -0.094997987 | 0.656107842 |
| TRANSCRIPTION FACTOR ACTIVITY DIRECT LIGAND REGULATED          |     |              |             |
| SEQUENCE SPECIFIC DNA BINDING                                  | 42  | 0.110252312  | 0.391664911 |
| RACEMASE AND EPIMERASE ACTIVITY                                | 15  | 0.014651382  | 0.944892143 |
| PROTEIN LIPID COMPLEX BINDING                                  | 20  | 0.333430956  | 0.076552674 |
| CARBOXY LYASE ACTIVITY                                         | 31  | 0.049589075  | 0.738265071 |

|                                                                                       |     |              |             |
|---------------------------------------------------------------------------------------|-----|--------------|-------------|
| MIRNA BINDING                                                                         | 15  | -0.387010889 | 0.034962349 |
| ESTROGEN RECEPTOR BINDING                                                             | 37  | -0.003517162 | 0.97914486  |
| TRANSCRIPTIONAL REPRESSOR ACTIVITY RNA POLYMERASE II                                  | 141 | 0.056378748  | 0.420361764 |
| TRANSCRIPTION REGULATORY REGION SEQUENCE SPECIFIC BINDING                             | 13  | -0.135180263 | 0.536034142 |
| UBIQUITIN UBIQUITIN LIGASE ACTIVITY                                                   | 12  | -0.018529489 | 0.937215202 |
| FMN BINDING                                                                           | 22  | 0.152378382  | 0.395419134 |
| ADENYLYLTRANSFERASE ACTIVITY                                                          | 273 | -0.04976357  | 0.313813367 |
| ATPASE ACTIVITY COUPLED                                                               | 27  | -0.167380947 | 0.263150085 |
| S ACYLTRANSFERASE ACTIVITY                                                            | 18  | 0.187469327  | 0.339112573 |
| ANKYRIN BINDING                                                                       | 16  | 0.043046858  | 0.834826701 |
| PROTEASOME BINDING                                                                    | 14  | 0.193056399  | 0.385732592 |
| DNA N GLYCOSYLASE ACTIVITY                                                            | 13  | -0.109733355 | 0.617972626 |
| PHOSPHATIDYLINOSITOL MONOPHOSPHATE PHOSPHATASE ACTIVITY                               | 959 | 0.024470663  | 0.372168045 |
| PROTEIN DIMERIZATION ACTIVITY                                                         | 53  | 0.011605794  | 0.918077704 |
| TRANSFERASE ACTIVITY TRANSFERRING ALKYL OR ARYL OTHER THAN METHYL GROUPS              | 84  | -0.107793114 | 0.215545759 |
| UNFOLDED PROTEIN BINDING                                                              | 13  | -0.092762276 | 0.677746146 |
| POLY A BINDING                                                                        | 16  | -0.361725714 | 0.046346572 |
| ATPASE ACTIVATOR ACTIVITY                                                             | 8   | -0.229755791 | 0.391727009 |
| CARBOHYDRATE PHOSPHATASE ACTIVITY                                                     | 64  | 0.019702657  | 0.848137074 |
| VIRUS RECEPTOR ACTIVITY                                                               | 44  | -0.002209729 | 0.985718062 |
| NUCLEOSOME BINDING                                                                    | 29  | -0.334870995 | 0.01357101  |
| UBIQUITIN LIKE PROTEIN CONJUGATING ENZYME ACTIVITY                                    | 14  | -0.239672333 | 0.237318669 |
| ATP DEPENDENT MICROTUBULE MOTOR ACTIVITY                                              | 13  | 0.271082888  | 0.236554316 |
| C2H2 ZINC FINGER DOMAIN BINDING                                                       | 12  | 0.178687198  | 0.455756903 |
| CALCIUM ACTIVATED POTASSIUM CHANNEL ACTIVITY                                          | 346 | -0.034183631 | 0.438865047 |
| ACTIN BINDING                                                                         | 44  | -0.208128932 | 0.071591701 |
| PHOSPHATIDYLINOSITOL 4 5 BISPHOSPHATE BINDING                                         | 14  | 0.157623126  | 0.48074488  |
| PRENYLTRANSFERASE ACTIVITY                                                            | 41  | 0.16262579   | 0.211364312 |
| ANION CATION SYMPORTER ACTIVITY                                                       | 17  | -0.071663774 | 0.71307142  |
| LYSINE ACETYLATED HISTONE BINDING                                                     | 12  | -0.155373578 | 0.488996996 |
| PEPTIDE HORMONE RECEPTOR BINDING                                                      | 97  | 0.035407425  | 0.673017822 |
| INORGANIC ANION TRANSMEMBRANE TRANSPORTER ACTIVITY                                    | 37  | -0.092279808 | 0.483403024 |
| PROTEIN KINASE A BINDING                                                              | 14  | 0.109341837  | 0.622324949 |
| MANNOSIDASE ACTIVITY                                                                  | 561 | -0.10861999  | 0.001567593 |
| KINASE BINDING                                                                        | 315 | 0.101357032  | 0.032285186 |
| METAL ION TRANSMEMBRANE TRANSPORTER ACTIVITY                                          | 13  | 0.123254294  | 0.594118371 |
| COA HYDROLASE ACTIVITY                                                                | 8   | 0.139994962  | 0.634037515 |
| ADRENERGIC RECEPTOR ACTIVITY                                                          | 231 | 0.156572389  | 0.004621326 |
| GATED CHANNEL ACTIVITY                                                                | 7   | -0.354967234 | 0.189472531 |
| RNA DNA HYBRID RIBONUCLEASE ACTIVITY                                                  | 95  | -0.094217916 | 0.25247062  |
| HISTONE DEACETYLASE BINDING                                                           | 111 | -0.037836811 | 0.624284543 |
| ACTIN FILAMENT BINDING                                                                | 7   | -0.133072102 | 0.653850612 |
| HYDROLASE ACTIVITY ACTING ON CARBON NITROGEN BUT NOT PEPTIDE BONDS IN LINEAR AMIDINES | 562 | 0.04450385   | 0.20956196  |
| PROTEIN KINASE ACTIVITY                                                               | 124 | 0.152646144  | 0.042140822 |
| HEPARIN BINDING                                                                       | 28  | 0.03838416   | 0.805573724 |
| EPIDERMAL GROWTH FACTOR RECEPTOR BINDING                                              | 12  | 0.193068511  | 0.42922996  |
| LOW DENSITY LIPOPROTEIN PARTICLE BINDING                                              | 138 | -0.005091173 | 0.941919696 |
| SERINE HYDROLASE ACTIVITY                                                             | 50  | 0.158280435  | 0.180227191 |
| TRANSMEMBRANE RECEPTOR PROTEIN TYROSINE KINASE ACTIVITY                               | 24  | -0.139171516 | 0.384837849 |
| WNT PROTEIN BINDING                                                                   | 163 | -0.047163099 | 0.45923434  |
| TRANSFERASE ACTIVITY TRANSFERRING HEXOSYL GROUPS                                      | 8   | 0.426436776  | 0.10940488  |
| ARYL SULFOTRANSFERASE ACTIVITY                                                        | 8   | -0.091156687 | 0.747123717 |
| PROTEIN SERINE THREONINE PHOSPHATASE INHIBITOR ACTIVITY                               | 45  | -0.028015409 | 0.817389591 |
| HYDRO LYASE ACTIVITY                                                                  | 48  | -0.206731077 | 0.064416535 |
| TRANSLATION INITIATION FACTOR ACTIVITY                                                | 20  | 0.0178836    | 0.922455349 |
| LIPOPROTEIN PARTICLE RECEPTOR BINDING                                                 | 98  | 0.054305009  | 0.516547694 |
| LIGAND GATED CHANNEL ACTIVITY                                                         | 72  | 0.009595577  | 0.921062098 |
| RHO GTPASE BINDING                                                                    | 605 | 0.016004936  | 0.638332448 |
| PROTEIN HOMODIMERIZATION ACTIVITY                                                     | 17  | 0.214821332  | 0.296638406 |
| POLY PYRIMIDINE TRACT BINDING                                                         | 20  | 0.055493731  | 0.764267638 |
| PROTEIN PHOSPHORYLATED AMINO ACID BINDING                                             | 52  | 0.051372593  | 0.654499483 |
| COLLAGEN BINDING                                                                      | 715 | -0.048339792 | 0.119369674 |
| REGULATORY REGION NUCLEIC ACID BINDING                                                | 12  | 0.4639488    | 0.030658904 |
| TRIGLYCERIDE LIPASE ACTIVITY                                                          |     |              |             |

|                                                           |     |              |             |
|-----------------------------------------------------------|-----|--------------|-------------|
| N METHYLTRANSFERASE ACTIVITY                              | 75  | 0.027503727  | 0.772728039 |
| TRANSCRIPTIONAL ACTIVATOR ACTIVITY RNA POLYMERASE II      | 276 | 0.059652151  | 0.235361595 |
| TRANSCRIPTION REGULATORY REGION SEQUENCE SPECIFIC BINDING |     |              |             |
| L AMINO ACID TRANSMEMBRANE TRANSPORTER ACTIVITY           | 45  | 0.000326199  | 0.997869014 |
| ACETYLCHOLINE RECEPTOR ACTIVITY                           | 14  | 0.033693854  | 0.878353441 |
| CALCIUM ACTIVATED CATION CHANNEL ACTIVITY                 | 19  | 0.15787707   | 0.407427875 |
| KINASE REGULATOR ACTIVITY                                 | 167 | -0.000942142 | 0.988188579 |
| ENDONUCLEASE ACTIVITY ACTIVE WITH EITHER RIBO OR          |     |              |             |
| DEOXYRIBONUCLEIC ACIDS AND PRODUCING 5 PHOSPHOMONOESTERS  | 33  | -0.11774157  | 0.393476837 |
| CARBOXYPEPTIDASE ACTIVITY                                 | 31  | 0.082107062  | 0.58156024  |
| ATPASE REGULATOR ACTIVITY                                 | 29  | -0.310966728 | 0.022719615 |
| PHOSPHATIDYLINOSITOL PHOSPHATE BINDING                    | 102 | -0.121892175 | 0.121202638 |
| GTPASE INHIBITOR ACTIVITY                                 | 14  | -0.101523781 | 0.63281335  |
| PHOSPHATIDYLINOSITOL PHOSPHATE 5 PHOSPHATASE ACTIVITY     | 13  | 0.145919543  | 0.527816943 |
| ATPASE ACTIVITY COUPLED TO TRANSMEMBRANE MOVEMENT OF IONS |     |              |             |
| PHOSPHORYLATIVE MECHANISM                                 | 28  | 0.104793369  | 0.50600211  |
| GLUCOSIDASE ACTIVITY                                      | 11  | 0.163323884  | 0.516053047 |
| ORGANIC HYDROXY COMPOUND TRANSMEMBRANE TRANSPORTER        |     |              |             |
| ACTIVITY                                                  | 38  | -0.056320899 | 0.667337961 |
| EXTRACELLULAR MATRIX STRUCTURAL CONSTITUENT               | 60  | 0.007384426  | 0.944451806 |
| SOLUTE PROTON ANTIporter ACTIVITY                         | 12  | 0.033479046  | 0.888028698 |
| ACIDIC AMINO ACID TRANSMEMBRANE TRANSPORTER ACTIVITY      | 14  | 0.211160331  | 0.343204776 |
| ENDORIBONUCLEASE ACTIVITY PRODUCING 5 PHOSPHOMONOESTERS   | 26  | -0.089452901 | 0.568392088 |
| LYSOPHOSPHOLIPASE ACTIVITY                                | 15  | 0.560737229  | 0.001985162 |
| ADRENERGIC RECEPTOR BINDING                               | 19  | 0.040859888  | 0.829112406 |
| NUCLEOSIDE DIPHOSPHATASE ACTIVITY                         | 12  | -0.084575072 | 0.714259572 |
| ACETYLTRANSFERASE ACTIVITY                                | 94  | -0.054181641 | 0.516582798 |
| PASSIVE TRANSMEMBRANE TRANSPORTER ACTIVITY                | 335 | 0.100121886  | 0.029234595 |
| RNA POLYMERASE II CORE BINDING                            | 17  | -0.295239133 | 0.099481435 |
| MRNA BINDING                                              | 150 | -0.136905145 | 0.035072342 |
| MHC CLASS II RECEPTOR ACTIVITY                            | 9   | -0.07369339  | 0.782835295 |
| NEUROPEPTIDE RECEPTOR ACTIVITY                            | 23  | 0.254811815  | 0.135472444 |
| EXTRACELLULAR MATRIX BINDING                              | 46  | 0.255607874  | 0.038745967 |
| SEROTONIN RECEPTOR ACTIVITY                               | 9   | 0.294766768  | 0.278817106 |
| METALLOEXOPEPTIDASE ACTIVITY                              | 38  | 0.030884115  | 0.817283232 |
| TRNA BINDING                                              | 39  | -0.370819293 | 0.001162886 |
| CALCIUM ION BINDING                                       | 531 | 0.0399641    | 0.272377794 |
| NITRIC OXIDE SYNTHASE BINDING                             | 18  | -0.185972262 | 0.310150129 |
| PROTEIN C TERMINUS BINDING                                | 173 | -0.068255093 | 0.26751657  |
| GLYCINE BINDING                                           | 9   | -0.031634957 | 0.90696567  |
| THIOLESTER HYDROLASE ACTIVITY                             | 25  | 0.18923385   | 0.257002322 |
| INSULIN RECEPTOR BINDING                                  | 28  | -0.212981245 | 0.139348274 |
| R SMAD BINDING                                            | 22  | 0.494345987  | 0.003234065 |
| CIS TRANS ISOMERASE ACTIVITY                              | 38  | -0.146432935 | 0.250260924 |
| METALLOCARBOXYPEPTIDASE ACTIVITY                          | 17  | 0.107857686  | 0.5925372   |
| ALDEHYDE DEHYDROGENASE NAD ACTIVITY                       | 18  | 0.270260182  | 0.165730684 |
| OXIDOREDUCTASE ACTIVITY ACTING ON PAIRED DONORS WITH      |     |              |             |
| INCORPORATION OR REDUCTION OF MOLECULAR OXYGEN 2          |     |              |             |
| OXOGLUTARATE AS ONE DONOR AND INCORPORATION OF ONE ATOM   | 39  | 0.220798589  | 0.102833659 |
| EACH OF OXYGEN INTO BOTH DONORS                           |     |              |             |
| PHOSPHATE ION BINDING                                     | 9   | -0.158993758 | 0.541613759 |
| NUCLEOSIDE DIPHOSPHATE KINASE ACTIVITY                    | 13  | -0.067308245 | 0.762891916 |
| FAD BINDING                                               | 10  | -0.012781929 | 0.960490159 |
| CLATHRIN BINDING                                          | 54  | 0.124861732  | 0.271763136 |
| CATION CATION ANTIporter ACTIVITY                         | 17  | 0.021211559  | 0.9152695   |
| PROTEASE BINDING                                          | 92  | 0.094845265  | 0.275578089 |
| RAN GTPASE BINDING                                        | 30  | -0.295534502 | 0.028492175 |
| ANTIporter ACTIVITY                                       | 53  | -0.019811979 | 0.859660516 |
| AMMONIUM TRANSMEMBRANE TRANSPORTER ACTIVITY               | 18  | 0.091716129  | 0.639335654 |
| PHOSPHATASE ACTIVATOR ACTIVITY                            | 11  | -0.347962948 | 0.100073215 |
| FATTY ACID BINDING                                        | 23  | -0.085184419 | 0.609697153 |
| AMINOPEPTIDASE ACTIVITY                                   | 34  | -0.053714459 | 0.698313124 |
| NADPH BINDING                                             | 14  | -0.113247568 | 0.592215391 |
| SINGLE STRANDED RNA BINDING                               | 66  | -0.192579208 | 0.045829286 |
| CATECHOLAMINE BINDING                                     | 12  | 0.136091514  | 0.570402544 |
| CALCIUM DEPENDENT PROTEIN BINDING                         | 51  | 0.010674956  | 0.926041761 |

|                                                                                              |     |              |             |
|----------------------------------------------------------------------------------------------|-----|--------------|-------------|
| NUCLEOCYTOPLASMIC TRANSPORTER ACTIVITY                                                       | 23  | -0.146129862 | 0.379933355 |
| GLUTATHIONE PEROXIDASE ACTIVITY                                                              | 17  | -0.066922133 | 0.731577766 |
| PSEUDOURIDINE SYNTHASE ACTIVITY                                                              | 12  | 0.02942078   | 0.901454759 |
| G PROTEIN COUPLED RECEPTOR ACTIVITY                                                          | 327 | 0.137041319  | 0.003217104 |
| MAP KINASE ACTIVITY                                                                          | 13  | 0.129962363  | 0.572829099 |
| NEUROPEPTIDE HORMONE ACTIVITY                                                                | 18  | 0.218084716  | 0.260720066 |
| CATION TRANSMEMBRANE TRANSPORTER ACTIVITY                                                    | 468 | 0.043977418  | 0.256167018 |
| CHANNEL REGULATOR ACTIVITY                                                                   | 107 | 0.160373936  | 0.047525693 |
| INOSITOL TETRAKISPHOSPHATE PHOSPHATASE ACTIVITY                                              | 11  | 0.112654859  | 0.653585106 |
| PHOSPHOLIPASE BINDING                                                                        | 16  | -0.063404841 | 0.752782885 |
| STRUCTURAL CONSTITUENT OF EYE LENS                                                           | 12  | 0.240178346  | 0.309298928 |
| DISULFIDE OXIDOREDUCTASE ACTIVITY                                                            | 27  | -0.220063603 | 0.134818844 |
| GDP BINDING                                                                                  | 49  | 0.213569588  | 0.078355253 |
| PHOSPHORIC DIESTER HYDROLASE ACTIVITY                                                        | 78  | 0.010850613  | 0.907194626 |
| S100 PROTEIN BINDING                                                                         | 10  | -0.477897818 | 0.017630944 |
| KINASE ACTIVITY                                                                              | 737 | 0.029634011  | 0.340207129 |
| TRANSCRIPTION FACTOR ACTIVITY RNA POLYMERASE II DISTAL<br>ENHANCER SEQUENCE SPECIFIC BINDING | 72  | -0.115339669 | 0.219982535 |
| CARBOHYDRATE DERIVATIVE TRANSPORTER ACTIVITY                                                 | 33  | -0.018623116 | 0.895629952 |
| SERINE TYPE CARBOXYPEPTIDASE ACTIVITY                                                        | 11  | -0.07268916  | 0.763825267 |
| HORMONE ACTIVITY                                                                             | 70  | 0.194478567  | 0.051312355 |
| STEROID HORMONE RECEPTOR ACTIVITY                                                            | 52  | 0.292057329  | 0.011767593 |
| ANDROGEN RECEPTOR BINDING                                                                    | 36  | -0.23343875  | 0.074699471 |
| AMIDE TRANSMEMBRANE TRANSPORTER ACTIVITY                                                     | 11  | -0.216297589 | 0.343627005 |
| MANGANESE ION BINDING                                                                        | 45  | -0.095603911 | 0.422825153 |
| RNA CAP BINDING                                                                              | 12  | -0.182158239 | 0.415101782 |
| SCAVENGER RECEPTOR ACTIVITY                                                                  | 32  | 0.218898286  | 0.135538438 |
| CYCLIN DEPENDENT PROTEIN SERINE THREONINE KINASE INHIBITOR<br>ACTIVITY                       | 11  | -0.434255898 | 0.039692596 |
| ICOSANOID RECEPTOR ACTIVITY                                                                  | 12  | 0.380822151  | 0.091602144 |
| METALLOENDOPEPTIDASE ACTIVITY                                                                | 86  | -0.133912293 | 0.116431208 |
| PHOSPHATIDYLCHOLINE BINDING                                                                  | 13  | 0.128532067  | 0.577380362 |
| TRANSLATION ELONGATION FACTOR ACTIVITY                                                       | 16  | -0.288106371 | 0.120614648 |
| MONOSACCHARIDE TRANSMEMBRANE TRANSPORTER ACTIVITY                                            | 14  | -0.044740991 | 0.836144732 |
| HYDROLASE ACTIVITY ACTING ON ESTER BONDS                                                     | 632 | -0.0403163   | 0.221302747 |
| CAMP BINDING                                                                                 | 22  | -0.083939681 | 0.622719227 |
| GLYCOSAMINOGLYCAN BINDING                                                                    | 160 | 0.115747402  | 0.079865845 |
| VITAMIN D RECEPTOR BINDING                                                                   | 17  | -0.071853347 | 0.712283512 |
| DAMAGED DNA BINDING                                                                          | 62  | -0.066116652 | 0.518901467 |
| PROTEIN SERINE THREONINE KINASE ACTIVATOR ACTIVITY                                           | 18  | -0.187761828 | 0.304844525 |
| PHOSPHOLIPID TRANSLOCATING ATPASE ACTIVITY                                                   | 13  | 0.628706358  | 0.001648205 |
| ALCOHOL BINDING                                                                              | 79  | 0.150287065  | 0.109017277 |
| L ASCORBIC ACID BINDING                                                                      | 19  | 0.153184875  | 0.422153214 |
| DIPEPTIDASE ACTIVITY                                                                         | 11  | 0.040727555  | 0.869902851 |
| GLUTAMATE RECEPTOR ACTIVITY                                                                  | 19  | 0.044701762  | 0.81335107  |
| GAMMA TUBULIN BINDING                                                                        | 22  | -0.337869985 | 0.028515493 |
| PEPTIDASE ACTIVATOR ACTIVITY                                                                 | 35  | -0.143193564 | 0.283133654 |
| POLY PURINE TRACT BINDING                                                                    | 19  | -0.087114681 | 0.63703538  |
| INTRONIC TRANSCRIPTION REGULATORY REGION DNA BINDING                                         | 11  | 0.382979517  | 0.10961783  |
| HYDROLASE ACTIVITY ACTING ON ACID ANHYDRIDES                                                 | 707 | 0.016804299  | 0.595045039 |
| STEROL BINDING                                                                               | 37  | 0.286014411  | 0.033448452 |
| RNA POLYMERASE II TRANSCRIPTION FACTOR ACTIVITY SEQUENCE<br>SPECIFIC DNA BINDING             | 534 | 0.058993916  | 0.105535304 |
| PHOSPHATIDYLINOSITOL BINDING                                                                 | 175 | -0.023537514 | 0.703647559 |
| TRANSFORMING GROWTH FACTOR BETA BINDING                                                      | 15  | 0.185150185  | 0.3910828   |
| SH3 DOMAIN BINDING                                                                           | 100 | 0.062740501  | 0.450322079 |
| LIGASE ACTIVITY FORMING CARBON SULFUR BONDS                                                  | 32  | 0.106348487  | 0.469514387 |
| MANNOSE BINDING                                                                              | 13  | 0.352524538  | 0.114855639 |
| RNA POLYMERASE II REPRESSING TRANSCRIPTION FACTOR BINDING                                    | 26  | 0.072777835  | 0.654656161 |
| CATION SUGAR SYMPORTER ACTIVITY                                                              | 13  | -0.169069173 | 0.431757742 |
| PROTEIN SERINE THREONINE PHOSPHATASE ACTIVITY                                                | 61  | -0.103288779 | 0.311707598 |
| TRANSCRIPTION FACTOR ACTIVITY RNA POLYMERASE II TRANSCRIPTION<br>FACTOR BINDING              | 123 | 0.218125871  | 0.004258125 |
| AMINOACYL TRNA EDITING ACTIVITY                                                              | 10  | -0.455632667 | 0.040659472 |
| FOLIC ACID BINDING                                                                           | 7   | 0.168405606  | 0.592156424 |
| E BOX BINDING                                                                                | 26  | 0.077268334  | 0.635587144 |

|                                                                    |      |              |             |
|--------------------------------------------------------------------|------|--------------|-------------|
| GLUCOSE BINDING                                                    | 12   | -0.0950467   | 0.679928373 |
| NEUROTRANSMITTER SODIUM SYMPORTER ACTIVITY                         | 12   | 0.047710407  | 0.84132538  |
| NUCLEASE ACTIVITY                                                  | 181  | -0.040803696 | 0.50070993  |
| DIPEPTIDYL PEPTIDASE ACTIVITY                                      | 10   | 0.314744108  | 0.221793552 |
| TOXIC SUBSTANCE BINDING                                            | 9    | -0.022927432 | 0.932648714 |
| ESTRADIOL 17 BETA DEHYDROGENASE ACTIVITY                           | 10   | 0.391615525  | 0.114072457 |
| GDP DISSOCIATION INHIBITOR ACTIVITY                                | 9    | -0.174530803 | 0.503693106 |
| POLYSACCHARIDE BINDING                                             | 13   | 0.41451285   | 0.05897684  |
| SNAP RECEPTOR ACTIVITY                                             | 35   | -0.092149969 | 0.495050131 |
| MICROTUBULE SEVERING ATPASE ACTIVITY                               | 9    | -0.463999521 | 0.059366136 |
| RRNA METHYLTRANSFERASE ACTIVITY                                    | 12   | 0.124255763  | 0.605794069 |
| NON MEMBRANE SPANNING PROTEIN TYROSINE KINASE ACTIVITY             | 40   | -0.262210446 | 0.029157615 |
| H4 HISTONE ACETYLTRANSFERASE ACTIVITY                              | 16   | 0.014346688  | 0.944266735 |
| HISTONE DEMETHYLASE ACTIVITY                                       | 24   | -0.031175714 | 0.851025639 |
| EXONUCLEASE ACTIVITY                                               | 74   | -0.059003003 | 0.53005855  |
| MACROLIDE BINDING                                                  | 16   | -0.01466267  | 0.942684182 |
| INSULIN LIKE GROWTH FACTOR BINDING                                 | 23   | 0.135335981  | 0.436194561 |
| O METHYLTRANSFERASE ACTIVITY                                       | 17   | -0.04141148  | 0.833121987 |
| TROPOMYOSIN BINDING                                                | 10   | 0.191723494  | 0.464117254 |
| AMINO ACID TRANSMEMBRANE TRANSPORTER ACTIVITY                      | 63   | 0.037362641  | 0.719489138 |
| LYSOZYME ACTIVITY                                                  | 2    | 0.219468308  | 0.704933627 |
| ANION CHANNEL ACTIVITY                                             | 72   | 0.152728857  | 0.121100166 |
| STRUCTURAL CONSTITUENT OF NUCLEAR PORE                             | 14   | -0.245036257 | 0.231097928 |
| NUCLEOTIDASE ACTIVITY                                              | 14   | -0.06266953  | 0.771148634 |
| ION ANTIPTER ACTIVITY                                              | 32   | -0.107828409 | 0.442161176 |
| PHOSPHORIC ESTER HYDROLASE ACTIVITY                                | 330  | -0.072935273 | 0.103350901 |
| SIGNALING RECEPTOR ACTIVITY                                        | 729  | 0.128023413  | 5.23E-05    |
| SUGAR TRANSMEMBRANE TRANSPORTER ACTIVITY                           | 25   | -0.177491513 | 0.251094466 |
| INTERLEUKIN 1 RECEPTOR BINDING                                     | 13   | 0.227144042  | 0.323039559 |
| PROTEIN TRANSPORTER ACTIVITY                                       | 91   | -0.063004037 | 0.45704848  |
| IMMUNOGLOBULIN RECEPTOR BINDING                                    | 6    | 0.082860451  | 0.806526472 |
| RECEPTOR ACTIVATOR ACTIVITY                                        | 26   | 0.294893007  | 0.073286141 |
| ALCOHOL DEHYDROGENASE NADP ACTIVITY                                | 15   | 0.062319971  | 0.770452756 |
| NEUROTRANSMITTER RECEPTOR ACTIVITY                                 | 41   | 0.028422261  | 0.825135865 |
| DIACYLGLYCEROL BINDING                                             | 10   | -0.228008693 | 0.342558171 |
| PHOSPHOLIPASE INHIBITOR ACTIVITY                                   | 11   | -0.170699867 | 0.463172971 |
| ACTININ BINDING                                                    | 23   | -0.087351456 | 0.601314382 |
| PROTEIN SERINE THREONINE KINASE INHIBITOR ACTIVITY                 | 28   | -0.381914285 | 0.004717832 |
| OXIDOREDUCTASE ACTIVITY ACTING ON A SULFUR GROUP OF DONORS         | 11   | 0.171201416  | 0.497764918 |
| DISULFIDE AS ACCEPTOR                                              | 11   | 0.171201416  | 0.497764918 |
| TRANSCRIPTION COFACTOR BINDING                                     | 22   | -1.08E-05    | 0.999950842 |
| HSP90 PROTEIN BINDING                                              | 25   | 0.088369936  | 0.595038718 |
| AMINE BINDING                                                      | 9    | 0.571711174  | 0.012938449 |
| DIOXYGENASE ACTIVITY                                               | 74   | 0.090765261  | 0.349042535 |
| PHOSPHOTRANSFERASE ACTIVITY FOR OTHER SUBSTITUTED PHOSPHATE GROUPS | 19   | 0.067821114  | 0.721194165 |
| PALMITOYLTRANSFERASE ACTIVITY                                      | 34   | -0.069335136 | 0.615238222 |
| NUCLEAR LOCALIZATION SEQUENCE BINDING                              | 20   | -0.289427619 | 0.079884438 |
| RECEPTOR AGONIST ACTIVITY                                          | 12   | 0.087821594  | 0.714204872 |
| PHOSPHATASE BINDING                                                | 149  | 0.120289712  | 0.080187939 |
| RNA DIRECTED DNA POLYMERASE ACTIVITY                               | 7    | -0.579847385 | 0.010075417 |
| RAS GUANYL NUCLEOTIDE EXCHANGE FACTOR ACTIVITY                     | 193  | 0.067275343  | 0.261996474 |
| PROTEIN METHYLTRANSFERASE ACTIVITY                                 | 72   | -0.049508533 | 0.604326051 |
| LYSOPHOSPHOLIPID ACYLTRANSFERASE ACTIVITY                          | 19   | -0.134795887 | 0.45676964  |
| STRUCTURAL CONSTITUENT OF MUSCLE                                   | 34   | -0.018653805 | 0.893894802 |
| ENZYME ACTIVATOR ACTIVITY                                          | 399  | 0.013532346  | 0.745060638 |
| SH2 DOMAIN BINDING                                                 | 26   | -0.035753838 | 0.822344705 |
| CARBON CARBON LYASE ACTIVITY                                       | 43   | 0.077962815  | 0.537703994 |
| PROTEIN COMPLEX BINDING                                            | 825  | -0.033982102 | 0.242822617 |
| TRANSFERASE ACTIVITY TRANSFERRING ACYL GROUPS                      | 213  | -0.036814791 | 0.510722004 |
| FATTY ACID TRANSPORTER ACTIVITY                                    | 10   | 0.361791117  | 0.144113941 |
| PROTEIN TYROSINE SERINE THREONINE PHOSPHATASE ACTIVITY             | 40   | -0.188210563 | 0.129825289 |
| NUCLEOSIDE KINASE ACTIVITY                                         | 11   | -0.114582309 | 0.63121169  |
| NUCLEIC ACID BINDING TRANSCRIPTION FACTOR ACTIVITY                 | 1025 | -0.001093091 | 0.967046979 |
| FIBROBLAST GROWTH FACTOR BINDING                                   | 21   | 0.238772152  | 0.190228659 |
| ADP BINDING                                                        | 33   | -0.179093572 | 0.189594659 |

|                                                                                              |      |              |             |
|----------------------------------------------------------------------------------------------|------|--------------|-------------|
| BETA 1 3 GALACTOSYLTRANSFERASE ACTIVITY                                                      | 14   | 0.098510156  | 0.657344038 |
| CATION TRANSPORTING ATPASE ACTIVITY                                                          | 51   | -0.038106685 | 0.737579908 |
| ATPASE COUPLED ION TRANSMEMBRANE TRANSPORTER ACTIVITY                                        | 60   | -0.118739199 | 0.24687686  |
| STEROL TRANSPORTER ACTIVITY                                                                  | 13   | 0.544979655  | 0.00784146  |
| RNA POLYMERASE BINDING                                                                       | 34   | -0.135979553 | 0.314648127 |
| CARBOHYDRATE KINASE ACTIVITY                                                                 | 18   | -0.112291117 | 0.547965691 |
| BINDING BRIDGING                                                                             | 146  | 0.009387657  | 0.890459685 |
| THREONINE TYPE PEPTIDASE ACTIVITY                                                            | 19   | -0.223534968 | 0.20082541  |
| MONOOXYGENASE ACTIVITY                                                                       | 61   | 0.092450164  | 0.38488784  |
| ADENOSINE DEAMINASE ACTIVITY                                                                 | 9    | 0.422740034  | 0.128315541 |
| STRUCTURAL CONSTITUENT OF RIBOSOME                                                           | 196  | -0.204087927 | 0.00022887  |
| 14 3 3 PROTEIN BINDING                                                                       | 19   | 0.037780701  | 0.841688899 |
| COPPER ION BINDING                                                                           | 45   | 0.115394984  | 0.352321218 |
| MISMATCHED DNA BINDING                                                                       | 12   | -0.033274875 | 0.887161265 |
| HYDROLASE ACTIVITY ACTING ON GLYCOSYL BONDS                                                  | 93   | 0.121402514  | 0.160270546 |
| RAB GTPASE BINDING                                                                           | 107  | 0.007018759  | 0.92963235  |
| NAD ADP RIBOSYLTRANSFERASE ACTIVITY                                                          | 24   | -0.303880336 | 0.046637523 |
| GUANYL NUCLEOTIDE EXCHANGE FACTOR ACTIVITY                                                   | 261  | 0.026563858  | 0.604925186 |
| TELOMERASE RNA BINDING                                                                       | 13   | -0.363285344 | 0.062801554 |
| BETA TUBULIN BINDING                                                                         | 33   | -0.407879935 | 0.001419372 |
| INTRAMOLECULAR TRANSFERASE ACTIVITY                                                          | 25   | 0.070760526  | 0.669521609 |
| SERINE TYPE ENDOPEPTIDASE INHIBITOR ACTIVITY                                                 | 66   | 0.149509895  | 0.144592365 |
| HELICASE ACTIVITY                                                                            | 140  | -0.054834453 | 0.423889572 |
| RNA POLYMERASE CORE ENZYME BINDING                                                           | 21   | -0.191821626 | 0.254334134 |
| VOLTAGE GATED CHLORIDE CHANNEL ACTIVITY                                                      | 8    | 0.623444187  | 0.01125361  |
| PYRIDOXAL PHOSPHATE BINDING                                                                  | 42   | 0.037451437  | 0.768639739 |
| LIPASE INHIBITOR ACTIVITY                                                                    | 15   | -0.019677317 | 0.9254734   |
| CHROMATIN DNA BINDING                                                                        | 76   | -0.007815056 | 0.933678384 |
| ATPASE BINDING                                                                               | 69   | -0.228321972 | 0.012933635 |
| LAMIN BINDING                                                                                | 17   | -0.383573072 | 0.037251655 |
| PHOSPHATIDYLINOSITOL KINASE ACTIVITY                                                         | 44   | 0.057736556  | 0.643671854 |
| CYCLIC NUCLEOTIDE BINDING                                                                    | 30   | 0.038944839  | 0.795955962 |
| CYSTEINE TYPE ENDOPEPTIDASE ACTIVITY                                                         | 73   | -0.106271898 | 0.254950931 |
| OLIGOPEPTIDE BINDING                                                                         | 11   | -0.194488113 | 0.399660156 |
| CO SMAD BINDING                                                                              | 11   | 0.201560116  | 0.425080924 |
| GROWTH FACTOR ACTIVITY                                                                       | 120  | 0.179547924  | 0.018718382 |
| INTRACELLULAR CALCIUM ACTIVATED CHLORIDE CHANNEL ACTIVITY                                    | 13   | 0.127072293  | 0.584749699 |
| G PROTEIN COUPLED PHOTORECEPTOR ACTIVITY                                                     | 5    | -0.275472241 | 0.402829043 |
| ALDO KETO REDUCTASE NADP ACTIVITY                                                            | 23   | 0.071671201  | 0.678137704 |
| TRANSFERASE ACTIVITY TRANSFERRING ACYL GROUPS OTHER THAN AMINO ACYL GROUPS                   | 188  | -0.042568527 | 0.473899412 |
| MOLECULAR FUNCTION REGULATOR                                                                 | 1126 | 0.024950839  | 0.327009239 |
| CYSTEINE TYPE ENDOPEPTIDASE INHIBITOR ACTIVITY INVOLVED IN APOPTOTIC PROCESS                 | 20   | -0.084082111 | 0.63838723  |
| FIBRONECTIN BINDING                                                                          | 21   | 0.022685814  | 0.899409486 |
| POTASSIUM TRANSPORTING ATPASE ACTIVITY                                                       | 8    | 0.141043263  | 0.633388837 |
| MICROTUBULE MOTOR ACTIVITY                                                                   | 58   | -0.055334402 | 0.602222668 |
| OXIDOREDUCTASE ACTIVITY OXIDIZING METAL IONS                                                 | 15   | 0.021819709  | 0.918120396 |
| ALPHA TUBULIN BINDING                                                                        | 19   | -0.362020635 | 0.043650542 |
| EXCITATORY EXTRACELLULAR LIGAND GATED ION CHANNEL ACTIVITY                                   | 31   | -0.053615774 | 0.711718135 |
| OXIDOREDUCTASE ACTIVITY OXIDIZING METAL IONS NAD OR NADP AS ACCEPTOR                         | 10   | 0.182438132  | 0.486248898 |
| ATPASE ACTIVITY COUPLED TO MOVEMENT OF SUBSTANCES                                            | 101  | 0.10176903   | 0.220643221 |
| TRANSITION METAL ION TRANSMEMBRANE TRANSPORTER ACTIVITY                                      | 34   | -0.050513191 | 0.715805604 |
| DOUBLE STRANDED DNA BINDING                                                                  | 673  | -0.039726926 | 0.214410127 |
| TRANSITION METAL ION BINDING                                                                 | 1178 | 0.005146399  | 0.835899847 |
| TELOMERIC DNA BINDING                                                                        | 28   | -0.078651394 | 0.60479883  |
| MODIFIED AMINO ACID TRANSMEMBRANE TRANSPORTER ACTIVITY                                       | 12   | -0.119945749 | 0.599623539 |
| SCAFFOLD PROTEIN BINDING                                                                     | 40   | -0.060519297 | 0.635297083 |
| TRANSCRIPTIONAL REPRESSOR ACTIVITY RNA POLYMERASE II ACTIVATING TRANSCRIPTION FACTOR BINDING | 50   | 0.442699521  | 8.52E-05    |
| LOW DENSITY LIPOPROTEIN PARTICLE RECEPTOR BINDING                                            | 15   | -0.041227686 | 0.843842903 |
| PHOSPHATIDYLSERINE BINDING                                                                   | 29   | -0.200462776 | 0.161402267 |
| GLYCOLIPID BINDING                                                                           | 15   | -0.149295966 | 0.461212396 |
| RECEPTOR SIGNALING PROTEIN SERINE THREONINE KINASE ACTIVITY                                  | 89   | 0.05033532   | 0.566539325 |
| CALMODULIN BINDING                                                                           | 154  | 0.016465602  | 0.804390704 |

|                                                                                                         |      |              |             |
|---------------------------------------------------------------------------------------------------------|------|--------------|-------------|
| RNA POLYMERASE II CORE PROMOTER SEQUENCE SPECIFIC DNA BINDING                                           | 47   | -0.083118594 | 0.477688583 |
| MAP KINASE KINASE KINASE ACTIVITY                                                                       | 21   | 0.083371114  | 0.646035771 |
| MHC CLASS II PROTEIN COMPLEX BINDING                                                                    | 16   | 0.034599225  | 0.866640717 |
| PHOSPHOTYROSINE BINDING                                                                                 | 11   | 0.253329811  | 0.329673236 |
| NUCLEOSIDE TRIPHOSPHATASE REGULATOR ACTIVITY                                                            | 284  | -0.022982846 | 0.637382471 |
| LIGAND GATED CALCIUM CHANNEL ACTIVITY                                                                   | 16   | -0.25737712  | 0.165627332 |
| RIBOSOMAL SMALL SUBUNIT BINDING                                                                         | 12   | -0.061655306 | 0.791174548 |
| OMEGA PEPTIDASE ACTIVITY                                                                                | 13   | 0.368819978  | 0.097717703 |
| PHOSPHATIDYLCHOLINE 1 ACYLHYDROLASE ACTIVITY                                                            | 10   | 0.362728795  | 0.150025091 |
| ELECTRON CARRIER ACTIVITY                                                                               | 95   | -0.105996558 | 0.195192024 |
| HMG BOX DOMAIN BINDING                                                                                  | 15   | 0.237503187  | 0.26637023  |
| CHANNEL INHIBITOR ACTIVITY                                                                              | 32   | 0.112188492  | 0.445753917 |
| SUMO BINDING                                                                                            | 13   | -0.009525491 | 0.966454897 |
| PALMITOYL COA HYDROLASE ACTIVITY                                                                        | 8    | 0.326218074  | 0.253992639 |
| MANNOsylTRANSFERASE ACTIVITY                                                                            | 21   | 0.009642549  | 0.957039013 |
| RECEPTOR SERINE THREONINE KINASE BINDING                                                                | 14   | 0.160228784  | 0.476266522 |
| RETINAL BINDING                                                                                         | 6    | 0.383903957  | 0.225308426 |
| TRANSFERASE ACTIVITY TRANSFERRING GLYCOSYL GROUPS                                                       | 232  | -0.095578455 | 0.07062076  |
| TRANSFORMING GROWTH FACTOR BETA RECEPTOR BINDING                                                        | 38   | 0.247918564  | 0.066344378 |
| WW DOMAIN BINDING                                                                                       | 26   | 0.044277792  | 0.784621994 |
| PEPTIDE N ACETYLTRANSFERASE ACTIVITY                                                                    | 63   | 0.02454867   | 0.813031618 |
| GLUCOCORTICOID RECEPTOR BINDING                                                                         | 13   | -0.190062832 | 0.377133745 |
| LIGASE REGULATOR ACTIVITY                                                                               | 13   | -0.155966387 | 0.473553085 |
| ACTIVE TRANSMEMBRANE TRANSPORTER ACTIVITY                                                               | 271  | -0.018207812 | 0.71544732  |
| CAMP RESPONSE ELEMENT BINDING                                                                           | 13   | -0.419412619 | 0.032556701 |
| PROTEIN DISULFIDE OXIDOREDUCTASE ACTIVITY                                                               | 21   | -0.241212065 | 0.144931001 |
| PHOSPHATIDYLINOSITOL BISPHOSPHATE BINDING                                                               | 62   | -0.150978767 | 0.129535863 |
| CALCIUM ION TRANSMEMBRANE TRANSPORTER ACTIVITY                                                          | 103  | 0.027966299  | 0.730971623 |
| INTERMEDIATE FILAMENT BINDING                                                                           | 11   | -0.007373732 | 0.976119537 |
| AMIDE BINDING                                                                                           | 208  | -0.083295084 | 0.1364711   |
| LIPOPOLYSACCHARIDE BINDING                                                                              | 13   | 0.201338025  | 0.382704567 |
| LIGAND DEPENDENT NUCLEAR RECEPTOR BINDING                                                               | 20   | 0.214608273  | 0.256762084 |
| POLYPEPTIDE N ACETYL GALACTOSAMINYLTRANSFERASE ACTIVITY                                                 | 15   | 0.043892069  | 0.836830945 |
| MODIFIED AMINO ACID BINDING                                                                             | 54   | -0.147627188 | 0.166998135 |
| ION CHANNEL BINDING                                                                                     | 98   | -0.183685672 | 0.019641257 |
| FILAMIN BINDING                                                                                         | 10   | 0.31475433   | 0.215275188 |
| PROTEOGLYCAN BINDING                                                                                    | 25   | 0.200422631  | 0.230586589 |
| SUMO TRANSFERASE ACTIVITY                                                                               | 15   | -0.364175697 | 0.046662162 |
| MYOSIN HEAVY CHAIN BINDING                                                                              | 9    | 0.002955828  | 0.991359128 |
| LRR DOMAIN BINDING                                                                                      | 15   | 0.509714868  | 0.017057117 |
| TRANSFERASE ACTIVITY TRANSFERRING AMINO ACYL GROUPS                                                     | 14   | 0.232464096  | 0.288540053 |
| INTEGRIN BINDING                                                                                        | 98   | -0.117125197 | 0.145451441 |
| ALCOHOL TRANSMEMBRANE TRANSPORTER ACTIVITY                                                              | 14   | 0.161247075  | 0.468500533 |
| CALMODULIN DEPENDENT PROTEIN KINASE ACTIVITY                                                            | 26   | -0.130386879 | 0.40030189  |
| MICROFILAMENT MOTOR ACTIVITY                                                                            | 17   | 0.174605478  | 0.388034082 |
| THIOL DEPENDENT UBIQUITIN SPECIFIC PROTEASE ACTIVITY                                                    | 67   | -0.122119238 | 0.209982861 |
| FERROUS IRON BINDING                                                                                    | 20   | 0.076002935  | 0.681623144 |
| ACETYLCHOLINE BINDING                                                                                   | 9    | -0.058700972 | 0.827041766 |
| TRANSCRIPTION FACTOR ACTIVITY RNA POLYMERASE II CORE PROMOTER PROXIMAL REGION SEQUENCE SPECIFIC BINDING | 289  | 0.050980944  | 0.298905541 |
| INORGANIC CATION TRANSMEMBRANE TRANSPORTER ACTIVITY                                                     | 403  | 0.050748518  | 0.223525998 |
| NAD BINDING                                                                                             | 49   | 0.071886209  | 0.544392034 |
| ANION TRANSMEMBRANE TRANSPORTER ACTIVITY                                                                | 231  | -0.004505219 | 0.933738336 |
| CHAPERONE BINDING                                                                                       | 72   | -0.139778993 | 0.132025039 |
| PROTEIN TYROSINE PHOSPHATASE ACTIVITY                                                                   | 95   | -0.143242894 | 0.077179842 |
| IDENTICAL PROTEIN BINDING                                                                               | 1032 | -0.001150757 | 0.965199697 |
| GALACTOSYLTRANSFERASE ACTIVITY                                                                          | 28   | -0.200576134 | 0.17023501  |
| PHOSPHOTRANSFERASE ACTIVITY PHOSPHATE GROUP AS ACCEPTOR                                                 | 35   | 0.079558913  | 0.570774445 |
| ALKALI METAL ION BINDING                                                                                | 14   | -0.102295251 | 0.630309057 |
| RIBONUCLEOPROTEIN COMPLEX BINDING                                                                       | 90   | -0.154605528 | 0.062266473 |
| DNA APURINIC OR APYRIMIDINIC SITE LYASE ACTIVITY                                                        | 14   | 0.400647261  | 0.058656806 |
| NEUROFILIN BINDING                                                                                      | 14   | 0.077166058  | 0.727771753 |
| PEPTIDE ANTIGEN BINDING                                                                                 | 22   | -0.300310559 | 0.056040432 |
| DYNEIN BINDING                                                                                          | 23   | 0.256183043  | 0.154711375 |
| TRANSCRIPTIONAL REPRESSOR ACTIVITY RNA POLYMERASE II TRANSCRIPTION FACTOR BINDING                       | 78   | 0.3563342    | 0.000139145 |

|                                                                                        |     |              |             |
|----------------------------------------------------------------------------------------|-----|--------------|-------------|
| RAGE RECEPTOR BINDING                                                                  | 10  | -0.220868982 | 0.357004246 |
| TRANSLATION FACTOR ACTIVITY RNA BINDING                                                | 82  | -0.272706574 | 0.001096524 |
| LOW DENSITY LIPOPROTEIN RECEPTOR ACTIVITY                                              | 13  | 0.499851119  | 0.029759605 |
| CGMP BINDING                                                                           | 10  | 0.120695335  | 0.645642117 |
| DRUG BINDING                                                                           | 93  | -0.066395084 | 0.427551279 |
| SPECTRIN BINDING                                                                       | 20  | -0.113213547 | 0.523927373 |
| O ACYLTRANSFERASE ACTIVITY                                                             | 41  | -0.066563678 | 0.596744822 |
| TRANSFERASE ACTIVITY TRANSFERRING NITROGENOUS GROUPS                                   | 21  | 0.000792882  | 0.996459126 |
| TRANSLATION INITIATION FACTOR BINDING                                                  | 26  | -0.137146609 | 0.376821787 |
| BILE ACID TRANSMEMBRANE TRANSPORTER ACTIVITY                                           | 9   | 0.175051397  | 0.526608482 |
| PEPTIDASE ACTIVATOR ACTIVITY INVOLVED IN APOPTOTIC PROCESS                             | 19  | -0.220647922 | 0.207797643 |
| METAL CLUSTER BINDING                                                                  | 54  | 0.014794319  | 0.894783692 |
| ENZYME INHIBITOR ACTIVITY                                                              | 293 | -0.00421387  | 0.93035898  |
| OXYGEN BINDING                                                                         | 30  | 0.119723538  | 0.430224078 |
| ENDODEOXYRIBONUCLEASE ACTIVITY                                                         | 46  | 0.001083198  | 0.992847009 |
| CARBON NITROGEN LIGASE ACTIVITY WITH GLUTAMINE AS AMIDO N DONOR                        | 11  | -0.203912246 | 0.379321617 |
| OXIDOREDUCTASE ACTIVITY ACTING ON THE CH NH GROUP OF DONORS NAD OR NADP AS ACCEPTOR    | 16  | -0.033216106 | 0.870068083 |
| ORGANIC ACID TRANSMEMBRANE TRANSPORTER ACTIVITY                                        | 110 | -0.056326817 | 0.46570816  |
| LONG CHAIN FATTY ACID COA LIGASE ACTIVITY                                              | 10  | 0.030819595  | 0.905767126 |
| DEATH RECEPTOR BINDING                                                                 | 18  | -0.065641461 | 0.729655956 |
| SUPEROXIDE GENERATING NADPH OXIDASE ACTIVITY                                           | 6   | 0.363420858  | 0.268489454 |
| INTRAMOLECULAR OXIDOREDUCTASE ACTIVITY TRANSPOSING S S BONDS                           | 20  | -0.218338467 | 0.208008923 |
| RHO GUANYL NUCLEOTIDE EXCHANGE FACTOR ACTIVITY                                         | 65  | -0.083109577 | 0.403662817 |
| BICARBONATE TRANSMEMBRANE TRANSPORTER ACTIVITY                                         | 11  | -0.279363268 | 0.205411541 |
| HORMONE BINDING                                                                        | 42  | 0.081836693  | 0.523266218 |
| INOSITOL PHOSPHATE PHOSPHATASE ACTIVITY                                                | 20  | 0.208523762  | 0.261950865 |
| 3 5 DNA HELICASE ACTIVITY                                                              | 11  | 0.234585108  | 0.34577854  |
| FOUR WAY JUNCTION DNA BINDING                                                          | 15  | -0.250694766 | 0.19615502  |
| ISOPRENOID BINDING                                                                     | 20  | 0.313914744  | 0.087760945 |
| PROTEIN KINASE A CATALYTIC SUBUNIT BINDING                                             | 14  | -0.104610859 | 0.623534321 |
| INOSITOL TRISPHOSPHATE KINASE ACTIVITY                                                 | 10  | 0.547268788  | 0.03968407  |
| MHC CLASS I PROTEIN BINDING                                                            | 14  | -0.02361748  | 0.913577526 |
| ORGANIC ACID BINDING                                                                   | 163 | -0.044001068 | 0.490138023 |
| GABA RECEPTOR BINDING                                                                  | 14  | -0.196786161 | 0.344756433 |
| CARBOXYLIC ESTER HYDROLASE ACTIVITY                                                    | 96  | 0.067417977  | 0.426454424 |
| CARBON SULFUR LYASE ACTIVITY                                                           | 10  | -0.061841575 | 0.808181526 |
| CARRECEPTOR ACTIVITY                                                                   | 50  | 0.245057288  | 0.037374442 |
| LIPASE ACTIVATOR ACTIVITY                                                              | 10  | -0.139773362 | 0.575566846 |
| SOLUTE CATION ANTIporter ACTIVITY                                                      | 20  | 0.018485548  | 0.919857684 |
| GLUCURONOSYLTRANSFERASE ACTIVITY                                                       | 21  | 0.057093772  | 0.751742603 |
| ANNEALING ACTIVITY                                                                     | 12  | 0.37195088   | 0.110208698 |
| ION GATED CHANNEL ACTIVITY                                                             | 31  | 0.153806597  | 0.305798418 |
| HYDROGEN EXPORTING ATPASE ACTIVITY                                                     | 25  | 0.009646201  | 0.953118452 |
| MAP KINASE PHOSPHATASE ACTIVITY                                                        | 14  | -0.347190079 | 0.089658308 |
| HEPARAN SULFATE PROTEOGLYCAN BINDING                                                   | 15  | 0.263246623  | 0.217217028 |
| ORGANIC ANION TRANSMEMBRANE TRANSPORTER ACTIVITY                                       | 137 | -0.076628256 | 0.265850032 |
| WIDE PORE CHANNEL ACTIVITY                                                             | 19  | 0.007191956  | 0.969496256 |
| DEOXYRIBONUCLEASE ACTIVITY                                                             | 62  | -0.122801289 | 0.222710496 |
| RRNA BINDING                                                                           | 56  | -0.128588047 | 0.225035478 |
| OXIDOREDUCTASE ACTIVITY ACTING ON SINGLE DONORS WITH INCORPORATION OF MOLECULAR OXYGEN | 21  | 0.091355003  | 0.614041233 |
| ORGANIC ACID SODIUM SYMPORTER ACTIVITY                                                 | 26  | 0.153079369  | 0.349691607 |
| CARBOHYDRATE TRANSPORTER ACTIVITY                                                      | 30  | -0.148303077 | 0.299076966 |
| VITAMIN BINDING                                                                        | 61  | 0.141226519  | 0.185435217 |
| RAL GTPASE BINDING                                                                     | 13  | 0.391991055  | 0.077870325 |
| CHEMOKINE ACTIVITY                                                                     | 33  | 0.230152298  | 0.108766635 |
| UDP GLYCOSYLTRANSFERASE ACTIVITY                                                       | 112 | -0.018261071 | 0.813183663 |
| GLUTATHIONE TRANSFERASE ACTIVITY                                                       | 27  | -0.034022417 | 0.827675716 |
| OXIDOREDUCTASE ACTIVITY ACTING ON NAD P H OXYGEN AS ACCEPTOR                           | 10  | 0.275671511  | 0.288075814 |
| SULFOTRANSFERASE ACTIVITY                                                              | 42  | 0.028342983  | 0.823569185 |
| WNT ACTIVATED RECEPTOR ACTIVITY                                                        | 19  | -0.101242394 | 0.578992611 |
| PHOSPHATIDYLINOSITOL 3 PHOSPHATE BINDING                                               | 29  | -0.162324492 | 0.261089014 |
| LYASE ACTIVITY                                                                         | 153 | 0.046623384  | 0.486822707 |
| CHOLESTEROL TRANSPORTER ACTIVITY                                                       | 8   | 0.711446444  | 0.000886414 |

|                                                              |      |              |             |
|--------------------------------------------------------------|------|--------------|-------------|
| TRANSCRIPTIONAL ACTIVATOR ACTIVITY RNA POLYMERASE II CORE    | 201  | 0.092033257  | 0.119232225 |
| PROMOTER PROXIMAL REGION SEQUENCE SPECIFIC BINDING           |      |              |             |
| SINGLE STRANDED DNA DEPENDENT ATPASE ACTIVITY                | 12   | -0.287425892 | 0.190582018 |
| N ACYLTRANSFERASE ACTIVITY                                   | 94   | -0.031948685 | 0.703726943 |
| PROTEIN PHOSPHATASE 1 BINDING                                | 16   | 0.016044744  | 0.937709358 |
| CHEMOATTRACTANT ACTIVITY                                     | 24   | -0.140724317 | 0.378135749 |
| CORECEPTOR ACTIVITY                                          | 31   | 0.015135115  | 0.918293329 |
| QUATERNARY AMMONIUM GROUP BINDING                            | 25   | -0.029263693 | 0.857187591 |
| VOLTAGE GATED POTASSIUM CHANNEL ACTIVITY                     | 62   | 0.262525028  | 0.012521694 |
| CYCLIN DEPENDENT PROTEIN KINASE ACTIVITY                     | 28   | 0.014359297  | 0.926290051 |
| TRANSMEMBRANE TRANSPORTER ACTIVITY                           | 767  | 0.012285494  | 0.686007513 |
| CHEMOKINE BINDING                                            | 18   | 0.073663231  | 0.706030531 |
| PEPTIDE HORMONE BINDING                                      | 20   | 0.062350154  | 0.736210157 |
| KINESIN BINDING                                              | 30   | -0.193550312 | 0.171056612 |
| PHOSPHATIDYLINOSITOL 3 KINASE ACTIVITY                       | 64   | 0.21932068   | 0.035216582 |
| UBIQUITIN LIKE PROTEIN CONJUGATING ENZYME BINDING            | 32   | 0.325953665  | 0.025625241 |
| STEROID HORMONE RECEPTOR BINDING                             | 74   | -0.100673736 | 0.279632739 |
| BITTER TASTE RECEPTOR ACTIVITY                               | 7    | 0.208971136  | 0.504415858 |
| PROTEIN KINASE C ACTIVITY                                    | 16   | 0.027823026  | 0.892434982 |
| AU RICH ELEMENT BINDING                                      | 22   | -0.097643162 | 0.565948759 |
| UBIQUITIN LIKE PROTEIN LIGASE BINDING                        | 244  | -0.093350174 | 0.070810859 |
| LIPOPROTEIN PARTICLE RECEPTOR ACTIVITY                       | 15   | 0.438066599  | 0.041228721 |
| RNA HELICASE ACTIVITY                                        | 62   | -0.152839082 | 0.126213252 |
| CYCLIN DEPENDENT PROTEIN SERINE THREONINE KINASE REGULATOR   |      |              |             |
| ACTIVITY                                                     | 26   | -0.391904388 | 0.005291019 |
| CCR CHEMOKINE RECEPTOR BINDING                               | 22   | 0.256313113  | 0.141681388 |
| GABA RECEPTOR ACTIVITY                                       | 17   | 0.101258589  | 0.614847989 |
| DNA DEPENDENT ATPASE ACTIVITY                                | 71   | -0.138553127 | 0.139537425 |
| METALLOPEPTIDASE ACTIVITY                                    | 144  | -0.071060716 | 0.291044447 |
| UBIQUITIN LIKE PROTEIN LIGASE ACTIVITY                       | 184  | -0.040023385 | 0.505678509 |
| OXIDOREDUCTASE ACTIVITY ACTING ON THE CH CH GROUP OF DONORS  |      |              |             |
| NAD OR NADP AS ACCEPTOR                                      | 22   | -0.103924358 | 0.539940452 |
| GUANYL NUCLEOTIDE BINDING                                    | 337  | 0.048147046  | 0.289837854 |
| PHOSPHATIDYLINOSITOL 3 KINASE BINDING                        | 28   | -0.019334392 | 0.900127848 |
| ENDONUCLEASE ACTIVITY                                        | 108  | 0.022371163  | 0.77801503  |
| TRANSCRIPTIONAL REPRESSOR ACTIVITY RNA POLYMERASE II CORE    |      |              |             |
| PROMOTER PROXIMAL REGION SEQUENCE SPECIFIC BINDING           | 92   | 0.02355458   | 0.784088174 |
| ANION ANION ANTIPORTER ACTIVITY                              | 15   | -0.242155253 | 0.207393702 |
| TASTE RECEPTOR ACTIVITY                                      | 8    | 0.224908376  | 0.441027879 |
| ORGANIC CATION TRANSMEMBRANE TRANSPORTER ACTIVITY            | 12   | 0.348411427  | 0.131016598 |
| WATER TRANSMEMBRANE TRANSPORTER ACTIVITY                     | 8    | 0.084440271  | 0.773112604 |
| ACTIVIN BINDING                                              | 12   | 0.3964035    | 0.089763006 |
| OXIDOREDUCTASE ACTIVITY ACTING ON THE CH NH2 GROUP OF DONORS |      |              |             |
| BETA AMYLOID BINDING                                         | 17   | 0.217509743  | 0.278525504 |
| HYDROLASE ACTIVITY HYDROLYZING N GLYCOSYL COMPOUNDS          | 27   | 0.273714118  | 0.086059759 |
| PROTEIN HORMONE RECEPTOR ACTIVITY                            | 20   | 0.277327233  | 0.130944835 |
| CHEMOKINE RECEPTOR BINDING                                   | 6    | -0.238588405 | 0.436794343 |
| PROLINE RICH REGION BINDING                                  | 42   | 0.278443524  | 0.027293551 |
| VOLTAGE GATED SODIUM CHANNEL ACTIVITY                        | 18   | 0.213398544  | 0.282766134 |
| OXIDOREDUCTASE ACTIVITY ACTING ON PAIRED DONORS WITH         |      |              |             |
| INCORPORATION OR REDUCTION OF MOLECULAR OXYGEN               | 17   | -0.032949104 | 0.867145052 |
| TRANSCRIPTION FACTOR ACTIVITY PROTEIN BINDING                | 113  | 0.091528449  | 0.243245794 |
| INTRAMOLECULAR TRANSFERASE ACTIVITY PHOSPHOTRANSFERASES      |      |              |             |
| SINGLE STRANDED DNA BINDING                                  | 529  | 0.076667124  | 0.03683906  |
| TYPE I INTERFERON RECEPTOR BINDING                           | 10   | -0.087624186 | 0.729111615 |
| RIBONUCLEOTIDE BINDING                                       | 81   | -0.039865477 | 0.658934519 |
| TRANSCRIPTION COACTIVATOR BINDING                            | 6    | 0.276014143  | 0.407631258 |
| RETINOIC ACID RECEPTOR BINDING                               | 1604 | -0.020189556 | 0.348402449 |
| PHOSPHATIDYLINOSITOL PHOSPHATE KINASE ACTIVITY               | 10   | -0.05788734  | 0.820526751 |
| ACTIVATING TRANSCRIPTION FACTOR BINDING                      | 33   | -0.113627685 | 0.412753275 |
| NEUREXIN FAMILY PROTEIN BINDING                              | 14   | 0.169510267  | 0.445789302 |
| MICROTUBULE BINDING                                          | 53   | 0.044587413  | 0.694598209 |
| TUBULIN BINDING                                              | 12   | -0.089745735 | 0.697039634 |
| ORGANOPHOSPHATE ESTER TRANSMEMBRANE TRANSPORTER ACTIVITY     | 173  | -0.127817221 | 0.034627083 |
| TRANSMEMBRANE RECEPTOR PROTEIN PHOSPHATASE ACTIVITY          | 232  | -0.122967326 | 0.019129191 |
| NADP BINDING                                                 | 21   | -0.333931377 | 0.037274672 |
|                                                              | 17   | 0.087403067  | 0.664497537 |
|                                                              | 38   | -0.125342665 | 0.3289406   |

|                                                                                 |     |              |             |
|---------------------------------------------------------------------------------|-----|--------------|-------------|
| S ADENOSYLMETHIONINE DEPENDENT METHYLTRANSFERASE ACTIVITY                       | 122 | -0.0035591   | 0.96179712  |
| KINASE ACTIVATOR ACTIVITY                                                       | 53  | 0.156806879  | 0.173250638 |
| HISTONE LYSINE N METHYLTRANSFERASE ACTIVITY                                     | 40  | -0.076388082 | 0.548121236 |
| INSULIN LIKE GROWTH FACTOR RECEPTOR BINDING                                     | 12  | -0.456691272 | 0.020598388 |
| MOTOR ACTIVITY                                                                  | 100 | 0.019289707  | 0.814905966 |
| TRANSCRIPTION FACTOR BINDING                                                    | 475 | -0.048332053 | 0.200382548 |
| TRNA SPECIFIC RIBONUCLEASE ACTIVITY                                             | 15  | 0.154988458  | 0.470329839 |
| SOLUTE CATION SYMPORTER ACTIVITY                                                | 72  | 0.005640611  | 0.953510004 |
| UBIQUITIN SPECIFIC PROTEASE BINDING                                             | 12  | 0.422372806  | 0.090493825 |
| PHOSPHOLIPID TRANSPORTER ACTIVITY                                               | 42  | 0.398498124  | 0.001306528 |
| RETINOID X RECEPTOR BINDING                                                     | 16  | -0.204310999 | 0.300255496 |
| MONOCARBOXYLIC ACID TRANSMEMBRANE TRANSPORTER ACTIVITY                          | 33  | -0.127900626 | 0.352062845 |
| ANION TRANSMEMBRANE TRANSPORTING ATPASE ACTIVITY                                | 8   | -0.46374603  | 0.047977336 |
| POTASSIUM ION BINDING                                                           | 9   | -0.196664548 | 0.441329916 |
| BASAL TRANSCRIPTION MACHINERY BINDING                                           | 25  | -0.295018821 | 0.045600183 |
| INTRACELLULAR LIGAND GATED ION CHANNEL ACTIVITY                                 | 23  | -0.160340887 | 0.32259728  |
| LIGASE ACTIVITY FORMING CARBON NITROGEN BONDS                                   | 52  | -0.171047269 | 0.113563587 |
| 1 PHOSPHATIDYLINOSITOL BINDING                                                  | 17  | 0.25076131   | 0.217384738 |
| OXIDOREDUCTASE ACTIVITY ACTING ON PEROXIDE AS ACCEPTOR                          | 34  | -0.06439535  | 0.641106297 |
| GROWTH FACTOR RECEPTOR BINDING                                                  | 113 | -0.040666387 | 0.595190343 |
| PHOSPHOLIPASE A2 ACTIVITY                                                       | 20  | 0.190012215  | 0.305276107 |
| TITIN BINDING                                                                   | 13  | 0.030567888  | 0.89349579  |
| NUCLEOBASE CONTAINING COMPOUND TRANSMEMBRANE TRANSPORTER ACTIVITY               | 30  | -0.265153625 | 0.055245936 |
| GTPASE ACTIVATING PROTEIN BINDING                                               | 13  | -0.125481179 | 0.568099507 |
| OXIDOREDUCTASE ACTIVITY ACTING ON THE CH NH2 GROUP OF DONORS OXYGEN AS ACCEPTOR | 14  | 0.155087814  | 0.485219453 |
| LIGAND DEPENDENT NUCLEAR RECEPTOR TRANSCRIPTION COACTIVATOR ACTIVITY            | 49  | 0.001321529  | 0.990994521 |
| HSP70 PROTEIN BINDING                                                           | 29  | -0.051614751 | 0.731028296 |
| SNRNA BINDING                                                                   | 34  | -0.478514454 | 2.84E-05    |
| ENZYME REGULATOR ACTIVITY                                                       | 799 | 0.005528176  | 0.852676892 |
| ARF GUANYL NUCLEOTIDE EXCHANGE FACTOR ACTIVITY                                  | 23  | -0.159218856 | 0.331434959 |
| CARBONATE DEHYDRATASE ACTIVITY                                                  | 11  | 0.18251849   | 0.466937636 |
| RECEPTOR SIGNALING COMPLEX SCAFFOLD ACTIVITY                                    | 18  | 0.362517741  | 0.066899004 |
| GLYCOPROTEIN BINDING                                                            | 92  | 0.036091301  | 0.675320267 |
| MYOSIN V BINDING                                                                | 17  | 0.245052577  | 0.228031055 |
| EXOPEPTIDASE ACTIVITY                                                           | 82  | 0.005012591  | 0.955916635 |
| NUCLEOTIDE TRANSMEMBRANE TRANSPORTER ACTIVITY                                   | 18  | -0.376428365 | 0.028550169 |
| FUCOSYLTRANSFERASE ACTIVITY                                                     | 9   | -0.275477092 | 0.263037116 |
| SOLUTE PROTON SYMPORTER ACTIVITY                                                | 19  | -0.305093644 | 0.070030367 |
| PLATELET DERIVED GROWTH FACTOR BINDING                                          | 10  | -0.219173142 | 0.36227811  |
| PHOSPHOTRANSFERASE ACTIVITY NITROGENOUS GROUP AS ACCEPTOR                       | 9   | -0.15316805  | 0.555973203 |
| SNARE BINDING                                                                   | 107 | 0.013321915  | 0.867059272 |
| GTP RHO BINDING                                                                 | 15  | 0.013899627  | 0.947705875 |
| DELAYED RECTIFIER POTASSIUM CHANNEL ACTIVITY                                    | 23  | 0.226324961  | 0.19116508  |
| NAD DEPENDENT PROTEIN DEACETYLASE ACTIVITY                                      | 15  | -0.117061096 | 0.566725078 |
| PHOSPHATIDIC ACID BINDING                                                       | 13  | -0.188290871 | 0.380912267 |
| DICARBOXYLIC ACID TRANSMEMBRANE TRANSPORTER ACTIVITY                            | 29  | -0.052655191 | 0.725708438 |
| TRANSLATION REGULATOR ACTIVITY                                                  | 31  | 0.263269537  | 0.086327112 |
| ACETYLGUCOSAMINYLTRANSFERASE ACTIVITY                                           | 43  | 0.070368668  | 0.578391073 |
| INTRAMOLECULAR OXIDOREDUCTASE ACTIVITY TRANSPOSING C C BONDS                    | 9   | -0.391748323 | 0.095548849 |
| NF KAPPAB BINDING                                                               | 29  | -0.087933536 | 0.554164082 |
| SODIUM INDEPENDENT ORGANIC ANION TRANSMEMBRANE TRANSPORTER ACTIVITY             | 13  | -0.116991743 | 0.593681668 |
| BIOACTIVE LIPID RECEPTOR ACTIVITY                                               | 10  | -0.015358037 | 0.952507948 |
| STORE OPERATED CALCIUM CHANNEL ACTIVITY                                         | 11  | -0.238803358 | 0.29627034  |
| CALCIUM DEPENDENT PROTEIN KINASE ACTIVITY                                       | 12  | -0.11110863  | 0.627863876 |
| MACROMOLECULE TRANSMEMBRANE TRANSPORTER ACTIVITY                                | 19  | -0.283643991 | 0.101334475 |
| PEPTIDASE INHIBITOR ACTIVITY                                                    | 123 | 0.094191736  | 0.209710024 |
| RAC GTPASE BINDING                                                              | 37  | 0.099027997  | 0.469024951 |
| SULFURIC ESTER HYDROLASE ACTIVITY                                               | 16  | -0.011114972 | 0.956571639 |
| SECONDARY ACTIVE TRANSMEMBRANE TRANSPORTER ACTIVITY                             | 170 | -0.060586819 | 0.329854179 |
| PEPTIDOGLYCAN BINDING                                                           | 5   | 0.035394091  | 0.923442481 |
| DRUG TRANSPORTER ACTIVITY                                                       | 19  | -0.09101627  | 0.619724094 |
| HYALURONIC ACID BINDING                                                         | 17  | 0.059205238  | 0.767839931 |

|                                                              |      |              |             |
|--------------------------------------------------------------|------|--------------|-------------|
| ENZYME BINDING                                               | 1585 | -0.052155686 | 0.015428411 |
| TRANSLATION REPRESSOR ACTIVITY                               | 18   | 0.418069026  | 0.034959767 |
| DNA DIRECTED DNA POLYMERASE ACTIVITY                         | 25   | 0.018688292  | 0.90947939  |
| COFACTOR BINDING                                             | 223  | 0.015333253  | 0.781803301 |
| RNA POLYMERASE II ACTIVATING TRANSCRIPTION FACTOR BINDING    | 33   | 0.045338018  | 0.752707485 |
| RNA POLYMERASE II TRANSCRIPTION COACTIVATOR ACTIVITY         | 35   | 0.537204518  | 1.51E-05    |
| PEROXISOME PROLIFERATOR ACTIVATED RECEPTOR BINDING           | 13   | -0.206972546 | 0.337209353 |
| K63 LINKED POLYUBIQUITIN BINDING                             | 17   | -0.438340971 | 0.010796913 |
| OXIDOREDUCTASE ACTIVITY ACTING ON CH OH GROUP OF DONORS      | 109  | 0.118617154  | 0.137766619 |
| CULLIN FAMILY PROTEIN BINDING                                | 12   | 0.219428054  | 0.356000389 |
| PROTEIN TYROSINE KINASE BINDING                              | 49   | -0.147712931 | 0.187737395 |
| INSULIN RECEPTOR SUBSTRATE BINDING                           | 10   | 0.008893118  | 0.972636828 |
| MONOVALENT CATION PROTON ANTIporter ACTIVITY                 | 9    | 0.043684813  | 0.873795817 |
| ZINC ION BINDING                                             | 992  | -0.004442408 | 0.868574012 |
| TETRAPYRROLE BINDING                                         | 94   | 0.045100153  | 0.597239167 |
| 3 5 EXONUCLEASE ACTIVITY                                     | 46   | 0.02717171   | 0.822983575 |
| MITOGEN ACTIVATED PROTEIN KINASE KINASE BINDING              | 18   | 0.029920279  | 0.877466903 |
| PDZ DOMAIN BINDING                                           | 84   | 0.061380485  | 0.497873827 |
| POLY A RNA BINDING                                           | 1140 | -0.151250874 | 7.12E-10    |
| POTASSIUM CHANNEL REGULATOR ACTIVITY                         | 35   | 0.180041622  | 0.203576225 |
| EXTRACELLULAR LIGAND GATED ION CHANNEL ACTIVITY              | 45   | -0.006830818 | 0.955328591 |
| G PROTEIN COUPLED AMINE RECEPTOR ACTIVITY                    | 26   | 0.195864491  | 0.228178823 |
| CXCR CHEMOKINE RECEPTOR BINDING                              | 13   | 0.302063814  | 0.183720415 |
| IRON ION BINDING                                             | 114  | 0.123446247  | 0.114253094 |
| STEROID HYDROXYLASE ACTIVITY                                 | 18   | 0.071645415  | 0.713597918 |
| SIGNALING ADAPTOR ACTIVITY                                   | 61   | 0.055726577  | 0.599277879 |
| G PROTEIN BETA GAMMA SUBUNIT COMPLEX BINDING                 | 18   | 0.026991376  | 0.889348531 |
| DOPAMINE BINDING                                             | 7    | 0.036574741  | 0.906501011 |
| SH3 SH2 ADAPTOR ACTIVITY                                     | 41   | 0.120259354  | 0.356527405 |
| RETINOL BINDING                                              | 6    | 0.130663515  | 0.69951615  |
| INORGANIC ANION EXCHANGER ACTIVITY                           | 15   | 0.012365628  | 0.953456997 |
| RETINOL DEHYDROGENASE ACTIVITY                               | 12   | 0.094384296  | 0.693458293 |
| PHOSPHOLIPASE C ACTIVITY                                     | 28   | 0.15128119   | 0.337985434 |
| NUCLEOSOMAL DNA BINDING                                      | 29   | -0.205000627 | 0.153394074 |
| LIPASE ACTIVITY                                              | 91   | 0.159482933  | 0.06928698  |
| PROTEIN BINDING INVOLVED IN CELL CELL ADHESION               | 10   | -0.087925045 | 0.728311256 |
| PHOSPHATIDYLINOSITOL 3 4 BISPHOSPHATE BINDING                | 16   | -0.016020862 | 0.937365955 |
| ACTIN DEPENDENT ATPASE ACTIVITY                              | 11   | 0.24511766   | 0.329274783 |
| PROTEIN SERINE THREONINE KINASE ACTIVITY                     | 404  | 0.045849951  | 0.270628713 |
| METHYL CPG BINDING                                           | 18   | 0.126713439  | 0.520681896 |
| TRANSLATION REGULATOR ACTIVITY NUCLEIC ACID BINDING          | 15   | 0.4342101    | 0.067929237 |
| RECEPTOR ACTIVITY                                            | 932  | 0.124977331  | 9.36E-06    |
| ACTIN MONOMER BINDING                                        | 22   | -0.083525175 | 0.625037783 |
| REPRESSING TRANSCRIPTION FACTOR BINDING                      | 53   | -0.032995491 | 0.767729709 |
| POLYOL TRANSMEMBRANE TRANSPORTER ACTIVITY                    | 8    | 0.048956072  | 0.866768392 |
| CHROMATIN BINDING                                            | 400  | 0.059054169  | 0.159023165 |
| MYOSIN BINDING                                               | 53   | -0.063198511 | 0.568477111 |
| HYDROLASE ACTIVITY ACTING ON CARBON NITROGEN BUT NOT PEPTIDE | 72   | -0.035503872 | 0.711032442 |
| BONDS IN LINEAR AMIDES                                       |      |              |             |
| CHEMOREPELLANT ACTIVITY                                      | 25   | 0.293824486  | 0.079187828 |
| MAP KINASE KINASE ACTIVITY                                   | 12   | 0.293644437  | 0.21626853  |
| ANTIGEN BINDING                                              | 64   | -0.127005675 | 0.199454361 |
| PROTEIN DOMAIN SPECIFIC BINDING                              | 564  | 0.043912844  | 0.214848705 |
| SODIUM CHANNEL REGULATOR ACTIVITY                            | 28   | 0.308506681  | 0.045384476 |
| POLY A SPECIFIC RIBONUCLEASE ACTIVITY                        | 12   | 0.012600591  | 0.957574835 |
| OXIDOREDUCTASE ACTIVITY ACTING ON THE ALDEHYDE OR OXO GROUP  | 39   | -0.026609919 | 0.838260254 |
| OF DONORS                                                    |      |              |             |
| DOUBLE STRANDED RNA BINDING                                  | 63   | -0.228354466 | 0.018330299 |
| MHC PROTEIN BINDING                                          | 22   | 0.097757749  | 0.582631052 |
| POTASSIUM CHANNEL ACTIVITY                                   | 80   | 0.21048927   | 0.023852805 |
| FATTY ACID LIGASE ACTIVITY                                   | 11   | 0.101275065  | 0.686032119 |
| APOLIPOPROTEIN BINDING                                       | 13   | 0.507540156  | 0.014933197 |
| LIPID BINDING                                                | 527  | 0.060009354  | 0.101736635 |
| HISTONE ACETYLTRANSFERASE BINDING                            | 26   | 0.218333638  | 0.187871603 |
| STRUCTURAL CONSTITUENT OF CYTOSKELETON                       | 82   | -0.231916521 | 0.005990268 |
| IGG BINDING                                                  | 5    | 0.235833388  | 0.518674694 |

|                                                                                                                                                                                         |     |              |             |
|-----------------------------------------------------------------------------------------------------------------------------------------------------------------------------------------|-----|--------------|-------------|
| 2 IRON 2 SULFUR CLUSTER BINDING                                                                                                                                                         | 18  | -0.166029001 | 0.36481986  |
| ALPHA ACTININ BINDING                                                                                                                                                                   | 17  | -0.11440694  | 0.55379148  |
| OXIDOREDUCTASE ACTIVITY ACTING ON A SULFUR GROUP OF DONORS                                                                                                                              | 44  | -0.299740452 | 0.007229384 |
| DEACETYLASE ACTIVITY                                                                                                                                                                    | 51  | -0.084237677 | 0.453205569 |
| TUMOR NECROSIS FACTOR RECEPTOR BINDING                                                                                                                                                  | 28  | -0.057157775 | 0.707953847 |
| FLAVIN ADENINE DINUCLEOTIDE BINDING                                                                                                                                                     | 61  | 0.019499369  | 0.853184408 |
| TRANSFERASE ACTIVITY TRANSFERRING ONE CARBON GROUPS                                                                                                                                     | 192 | -0.079287686 | 0.173701871 |
| PROTEIN N TERMINUS BINDING                                                                                                                                                              | 94  | -0.007288868 | 0.931262999 |
| ANGIOTENSIN RECEPTOR BINDING                                                                                                                                                            | 12  | 0.396035141  | 0.096109901 |
| INWARD RECTIFIER POTASSIUM CHANNEL ACTIVITY                                                                                                                                             | 17  | 0.359949025  | 0.073398271 |
| GLUCOSYLTRANSFERASE ACTIVITY                                                                                                                                                            | 16  | -0.138366001 | 0.480794347 |
| RIBONUCLEASE P ACTIVITY                                                                                                                                                                 | 10  | 0.166068184  | 0.527287153 |
| P53 BINDING                                                                                                                                                                             | 64  | -0.058565459 | 0.562145246 |
| PROTON TRANSPORTING ATP SYNTHASE ACTIVITY ROTATIONAL MECHANISM                                                                                                                          | 10  | -0.257822881 | 0.277398994 |
| PEPTIDE RECEPTOR ACTIVITY                                                                                                                                                               | 87  | 0.101631549  | 0.254750026 |
| SYMPORTER ACTIVITY                                                                                                                                                                      | 104 | -0.041609847 | 0.601675238 |
| FRIZZLED BINDING                                                                                                                                                                        | 29  | 0.047114604  | 0.75873755  |
| RNA POLYMERASE II TRANSCRIPTION COFACTOR ACTIVITY                                                                                                                                       | 86  | 0.178399648  | 0.048915897 |
| RNA POLYMERASE II CARBOXY TERMINAL DOMAIN KINASE ACTIVITY                                                                                                                               | 16  | -0.006226587 | 0.975690433 |
| ENDORIBONUCLEASE ACTIVITY                                                                                                                                                               | 45  | 0.01411906   | 0.908230473 |
| NEUROTROPHIN RECEPTOR BINDING                                                                                                                                                           | 12  | 0.156692437  | 0.51945025  |
| UBIQUITIN LIKE PROTEIN SPECIFIC PROTEASE ACTIVITY                                                                                                                                       | 86  | -0.089033924 | 0.30416146  |
| PHOSPHOLIPID BINDING                                                                                                                                                                    | 305 | 0.043993447  | 0.356563753 |
| C ACYLTRANSFERASE ACTIVITY                                                                                                                                                              | 13  | 0.144419883  | 0.531503292 |
| INTRAMOLECULAR OXIDOREDUCTASE ACTIVITY                                                                                                                                                  | 45  | -0.115567661 | 0.330357476 |
| G PROTEIN COUPLED CHEMOATTRACTANT RECEPTOR ACTIVITY                                                                                                                                     | 20  | 0.046114815  | 0.802705101 |
| SEQUENCE SPECIFIC DNA BINDING                                                                                                                                                           | 873 | -0.012943145 | 0.649165153 |
| GTP DEPENDENT PROTEIN BINDING                                                                                                                                                           | 15  | 0.253874525  | 0.240295039 |
| TRANSCRIPTION COREPRESSOR ACTIVITY                                                                                                                                                      | 197 | 0.128142331  | 0.03231469  |
| DEATH RECEPTOR ACTIVITY                                                                                                                                                                 | 19  | 0.178223497  | 0.349719185 |
| RIBONUCLEASE ACTIVITY                                                                                                                                                                   | 85  | -0.015277767 | 0.863211098 |
| MISFOLDED PROTEIN BINDING                                                                                                                                                               | 11  | -0.008387596 | 0.972831278 |
| LAMININ BINDING                                                                                                                                                                         | 25  | 0.132178096  | 0.430690107 |
| GLUTAMATE RECEPTOR BINDING                                                                                                                                                              | 34  | -0.167425981 | 0.209285735 |
| CYTOKINE RECEPTOR ACTIVITY                                                                                                                                                              | 71  | 0.119238885  | 0.229091272 |
| ACID PHOSPHATASE ACTIVITY                                                                                                                                                               | 8   | 0.214558662  | 0.465073859 |
| ENDOPEPTIDASE ACTIVITY                                                                                                                                                                  | 304 | -0.104392905 | 0.023768938 |
| OXIDOREDUCTASE ACTIVITY ACTING ON PAIRED DONORS WITH INCORPORATION OR REDUCTION OF MOLECULAR OXYGEN REDUCED FLAVIN OR FLAVOPROTEIN AS ONE DONOR AND INCORPORATION OF ONE ATOM OF OXYGEN | 14  | 0.105069306  | 0.635831521 |
| ARYLSULFATASE ACTIVITY                                                                                                                                                                  | 11  | 0.113583542  | 0.650728335 |
| NOTCH BINDING                                                                                                                                                                           | 18  | -0.079415117 | 0.674914128 |
| CATION AMINO ACID SYMPORTER ACTIVITY                                                                                                                                                    | 10  | 0.166248344  | 0.531255345 |
| DEAMINASE ACTIVITY                                                                                                                                                                      | 26  | 0.217508628  | 0.188018802 |
| THYROID HORMONE RECEPTOR BINDING                                                                                                                                                        | 30  | -0.190756188 | 0.184896155 |
| RECEPTOR SIGNALING PROTEIN ACTIVITY                                                                                                                                                     | 162 | -0.019740319 | 0.758978887 |
| METALLOAMINOPEPTIDASE ACTIVITY                                                                                                                                                          | 14  | -0.142305984 | 0.497316071 |
| GAP JUNCTION CHANNEL ACTIVITY                                                                                                                                                           | 14  | -0.045805864 | 0.83226034  |
| DOPAMINE RECEPTOR BINDING                                                                                                                                                               | 16  | 0.2182791    | 0.297329139 |
| SIGNALING PATTERN RECOGNITION RECEPTOR ACTIVITY                                                                                                                                         | 14  | 0.144237816  | 0.516198724 |
| NEUROPEPTIDE BINDING                                                                                                                                                                    | 11  | 0.17685911   | 0.48048213  |
| HIGH VOLTAGE GATED CALCIUM CHANNEL ACTIVITY                                                                                                                                             | 8   | 0.294488155  | 0.301963972 |
| GAMMA CATENIN BINDING                                                                                                                                                                   | 10  | -0.286869362 | 0.214502566 |
| CALCIUM DEPENDENT CYSTEINE TYPE ENDOPEPTIDASE ACTIVITY                                                                                                                                  | 18  | 0.19189827   | 0.324437973 |
| TBP CLASS PROTEIN BINDING                                                                                                                                                               | 18  | -0.258854863 | 0.143555981 |
| OXIDOREDUCTASE ACTIVITY ACTING ON NAD P H QUINONE OR SIMILAR COMPOUND AS ACCEPTOR                                                                                                       | 49  | -0.094465483 | 0.407582948 |
| TAU PROTEIN KINASE ACTIVITY                                                                                                                                                             | 11  | 0.173947603  | 0.490622948 |
| TRANSCRIPTION FACTOR ACTIVITY RNA POLYMERASE II CORE PROMOTER SEQUENCE SPECIFIC                                                                                                         | 13  | 0.130238665  | 0.575000791 |
| RIBOSOME BINDING                                                                                                                                                                        | 45  | -0.203294675 | 0.078260471 |
| TRANSCRIPTION COACTIVATOR ACTIVITY                                                                                                                                                      | 273 | 0.057521552  | 0.254873001 |
| RECEPTOR REGULATOR ACTIVITY                                                                                                                                                             | 34  | 0.225651584  | 0.117477368 |
| LYSINE N METHYLTRANSFERASE ACTIVITY                                                                                                                                                     | 51  | 0.055109058  | 0.634796584 |

|                                                                                                                                                                  |      |              |             |
|------------------------------------------------------------------------------------------------------------------------------------------------------------------|------|--------------|-------------|
| SODIUM ION BINDING                                                                                                                                               | 10   | -0.086918868 | 0.73101783  |
| C C CHEMOKINE RECEPTOR ACTIVITY                                                                                                                                  | 11   | 0.28542254   | 0.24133183  |
| OXIDOREDUCTASE ACTIVITY                                                                                                                                          | 585  | -0.021869483 | 0.52421382  |
| MONOSACCHARIDE BINDING                                                                                                                                           | 62   | 0.095470035  | 0.366164354 |
| CORE PROMOTER PROXIMAL REGION DNA BINDING                                                                                                                        | 323  | -0.051310729 | 0.259416372 |
| EPHRIN RECEPTOR ACTIVITY                                                                                                                                         | 14   | 0.233459787  | 0.287699384 |
| ATPASE ACTIVITY                                                                                                                                                  | 365  | -0.037228995 | 0.38656073  |
| GTPASE BINDING                                                                                                                                                   | 271  | 0.026708325  | 0.596240892 |
| PRE MRNA BINDING                                                                                                                                                 | 24   | -0.404603734 | 0.006297284 |
| TRANSMEMBRANE RECEPTOR PROTEIN SERINE THREONINE KINASE ACTIVITY                                                                                                  | 16   | -0.096322769 | 0.629498575 |
| G PROTEIN COUPLED RECEPTOR BINDING                                                                                                                               | 203  | 0.102949062  | 0.079557832 |
| LIGASE ACTIVITY FORMING CARBON OXYGEN BONDS                                                                                                                      | 42   | -0.2744342   | 0.020097127 |
| CARBON OXYGEN LYASE ACTIVITY                                                                                                                                     | 65   | 0.015831772  | 0.876671553 |
| ADENYL NUCLEOTIDE BINDING                                                                                                                                        | 1307 | -0.037238526 | 0.113321823 |
| EXTRACELLULAR GLUTAMATE GATED ION CHANNEL ACTIVITY                                                                                                               | 15   | 0.115732056  | 0.589461085 |
| SOLUTE SODIUM SYMPORTER ACTIVITY                                                                                                                                 | 38   | 0.135789437  | 0.315399969 |
| PHOSPHATIDATE PHOSPHATASE ACTIVITY                                                                                                                               | 9    | 0.058164498  | 0.833053784 |
| TRANSFERASE ACTIVITY TRANSFERRING PENTOSYL GROUPS                                                                                                                | 52   | -0.231092563 | 0.029642964 |
| NUCLEOTIDE KINASE ACTIVITY                                                                                                                                       | 22   | 0.144581863  | 0.415675725 |
| NEUROTRANSMITTER TRANSPORTER ACTIVITY                                                                                                                            | 13   | 0.174617781  | 0.44986619  |
| TRNA METHYLTRANSFERASE ACTIVITY                                                                                                                                  | 19   | -0.204528843 | 0.245055497 |
| HISTONE METHYLTRANSFERASE ACTIVITY H3 K4 SPECIFIC                                                                                                                | 16   | 0.106824572  | 0.607722386 |
| CELL ADHESION MOLECULE BINDING                                                                                                                                   | 169  | -0.16546606  | 0.006209467 |
| RECEPTOR BINDING                                                                                                                                                 | 1195 | 0.010072531  | 0.68348137  |
| RECEPTOR INHIBITOR ACTIVITY                                                                                                                                      | 7    | 0.067348948  | 0.829677863 |
| CADHERIN BINDING                                                                                                                                                 | 27   | -0.245006297 | 0.089392744 |
| SEMAPHORIN RECEPTOR BINDING                                                                                                                                      | 21   | 0.148160638  | 0.417081008 |
| METALLOENDOPEPTIDASE INHIBITOR ACTIVITY                                                                                                                          | 12   | -0.069941984 | 0.762899967 |
| EPHRIN RECEPTOR BINDING                                                                                                                                          | 24   | 0.017606807  | 0.916403579 |
| CHLORIDE CHANNEL REGULATOR ACTIVITY                                                                                                                              | 13   | 0.312990973  | 0.174817145 |
| OPSONIN BINDING                                                                                                                                                  | 7    | 0.208316567  | 0.504653091 |
| DNA HELICASE ACTIVITY                                                                                                                                            | 47   | -0.035837594 | 0.762391747 |
| AMMONIUM ION BINDING                                                                                                                                             | 40   | 0.037667491  | 0.772769851 |
| RNA POLYMERASE II TRANSCRIPTION FACTOR BINDING                                                                                                                   | 97   | 0.091277081  | 0.281094764 |
| EXONUCLEASE ACTIVITY ACTIVE WITH EITHER RIBO OR DEOXYRIBONUCLEIC ACIDS AND PRODUCING 5 PHOSPHOMONOESTERS                                                         | 44   | -0.167986616 | 0.152603247 |
| ASPARTIC TYPE PEPTIDASE ACTIVITY                                                                                                                                 | 17   | -0.280249682 | 0.120470848 |
| RNA POLYMERASE ACTIVITY                                                                                                                                          | 44   | -0.021346406 | 0.862120312 |
| PROTEIN PHOSPHATASE 2A BINDING                                                                                                                                   | 26   | -0.089351587 | 0.569704871 |
| MONOCARBOXYLIC ACID BINDING                                                                                                                                      | 45   | 0.01799101   | 0.883313289 |
| ISOMERASE ACTIVITY                                                                                                                                               | 135  | -0.083117024 | 0.230314983 |
| HYDROLASE ACTIVITY ACTING ON CARBON NITROGEN BUT NOT PEPTIDE BONDS                                                                                               | 120  | 0.006858558  | 0.927216654 |
| PLATELET DERIVED GROWTH FACTOR RECEPTOR BINDING                                                                                                                  | 15   | -0.128958782 | 0.528064817 |
| DNA POLYMERASE BINDING                                                                                                                                           | 12   | 0.239917699  | 0.314636261 |
| NUCLEOBASE CONTAINING COMPOUND KINASE ACTIVITY                                                                                                                   | 42   | -0.032885044 | 0.793183907 |
| TRANSPORTER ACTIVITY                                                                                                                                             | 990  | 0.035392072  | 0.191052021 |
| VOLTAGE GATED CALCIUM CHANNEL ACTIVITY                                                                                                                           | 34   | 0.229589386  | 0.107851266 |
| CYTOKINE ACTIVITY                                                                                                                                                | 151  | 0.087300616  | 0.19816679  |
| EXODEOXYRIBONUCLEASE ACTIVITY                                                                                                                                    | 16   | -0.4274732   | 0.012465939 |
| 4 IRON 4 SULFUR CLUSTER BINDING                                                                                                                                  | 35   | -0.010977274 | 0.936642372 |
| OXIDOREDUCTASE ACTIVITY ACTING ON PAIRED DONORS WITH INCORPORATION OR REDUCTION OF MOLECULAR OXYGEN NAD P H AS ONE DONOR AND INCORPORATION OF ONE ATOM OF OXYGEN | 29   | -0.003456616 | 0.981849247 |
| PHOSPHOLIPASE ACTIVITY                                                                                                                                           | 75   | 0.140770425  | 0.144632076 |
| ARACHIDONIC ACID MONOOXYGENASE ACTIVITY                                                                                                                          | 8    | 0.198782155  | 0.497267727 |
| N ACETYLTRANSFERASE ACTIVITY                                                                                                                                     | 80   | -0.034939319 | 0.700877521 |
| HYDROLASE ACTIVITY HYDROLYZING O GLYCOSYL COMPOUNDS                                                                                                              | 70   | 0.078338193  | 0.42991896  |
| MACROMOLECULAR COMPLEX BINDING                                                                                                                                   | 1249 | -0.017638926 | 0.464048716 |
| INTRAMOLECULAR OXIDOREDUCTASE ACTIVITY INTERCONVERTING ALDOSES AND KETOSES                                                                                       | 11   | 0.543861667  | 0.014226949 |
| ACID THIOL LIGASE ACTIVITY                                                                                                                                       | 15   | -0.01851908  | 0.9298716   |
| STRUCTURAL MOLECULE ACTIVITY                                                                                                                                     | 591  | -0.098864533 | 0.003224999 |
| HISTONE DEACETYLASE ACTIVITY H3 K14 SPECIFIC                                                                                                                     | 10   | -0.08931984  | 0.723802484 |
| RNA BINDING                                                                                                                                                      | 1502 | -0.166073843 | 1.97E-14    |

|                                                                              |     |              |             |
|------------------------------------------------------------------------------|-----|--------------|-------------|
| ODORANT BINDING                                                              | 8   | 0.550181238  | 0.026961139 |
| CYSTEINE TYPE ENDOPEPTIDASE INHIBITOR ACTIVITY                               | 42  | 0.023670029  | 0.852144106 |
| PHOSPHATIDYLINOSITOL 3 4 5 TRISPHOSPHATE BINDING                             | 31  | -0.199643765 | 0.150132565 |
| RNA POLYMERASE II DISTAL ENHANCER SEQUENCE SPECIFIC DNA BINDING              | 54  | -0.344071865 | 0.000602086 |
| CYTOKINE RECEPTOR BINDING                                                    | 213 | 0.142664168  | 0.013344464 |
| PHOSPHATASE REGULATOR ACTIVITY                                               | 77  | -0.094618459 | 0.299672856 |
| OXIDOREDUCTASE ACTIVITY ACTING ON THE CH NH GROUP OF DONORS                  | 22  | -0.006485259 | 0.970316749 |
| TUMOR NECROSIS FACTOR RECEPTOR SUPERFAMILY BINDING                           | 45  | -0.039047546 | 0.746955603 |
| PROTEIN CHANNEL ACTIVITY                                                     | 10  | -0.081450037 | 0.748004867 |
| CORE PROMOTER SEQUENCE SPECIFIC DNA BINDING                                  | 93  | -0.041672839 | 0.620936492 |
| HISTONE KINASE ACTIVITY                                                      | 18  | -0.659990104 | 4.48E-06    |
| ARMADILLO REPEAT DOMAIN BINDING                                              | 13  | 0.111805702  | 0.627921479 |
| CATION CHANNEL ACTIVITY                                                      | 208 | 0.122936836  | 0.034465525 |
| RAB GUANYL NUCLEOTIDE EXCHANGE FACTOR ACTIVITY                               | 29  | -0.149992964 | 0.304379647 |
| OXIDIZED NAD BINDING                                                         | 12  | 0.141544908  | 0.55490126  |
| GROWTH FACTOR BINDING                                                        | 113 | -0.026374009 | 0.731246257 |
| CALCIUM CHANNEL REGULATOR ACTIVITY                                           | 32  | 0.142705842  | 0.332218569 |
| THIOESTERASE BINDING                                                         | 14  | -0.266445053 | 0.181864229 |
| INOSITOL TRISPHOSPHATE PHOSPHATASE ACTIVITY                                  | 11  | 0.116385421  | 0.642194534 |
| TRANSFERASE ACTIVITY TRANSFERRING PHOSPHORUS CONTAINING GROUPS               | 876 | 0.014227287  | 0.618300569 |
| HYDROLASE ACTIVITY ACTING ON ETHER BONDS                                     | 9   | 0.096650126  | 0.726972725 |
| ACYL COA DEHYDROGENASE ACTIVITY                                              | 14  | 0.158480952  | 0.476175138 |
| LIGASE ACTIVITY                                                              | 377 | -0.006166866 | 0.884930093 |
| HEXOSAMINIDASE ACTIVITY                                                      | 14  | 0.23683376   | 0.280914798 |
| MRNA 3 UTR BINDING                                                           | 47  | -0.078818293 | 0.501885639 |
| PHOSPHATIDYLINOSITOL 4 PHOSPHATE BINDING                                     | 19  | 0.136857044  | 0.474762959 |
| CYSTEINE TYPE ENDOPEPTIDASE ACTIVITY INVOLVED IN APOPTOTIC PROCESS           | 12  | -0.240912978 | 0.273434101 |
| SODIUM CHANNEL ACTIVITY                                                      | 27  | 0.061223078  | 0.700701294 |
| STRUCTURE SPECIFIC DNA BINDING                                               | 111 | -0.01369209  | 0.860117687 |
| COENZYME BINDING                                                             | 152 | 0.014630819  | 0.82685716  |
| SNORNA BINDING                                                               | 25  | -0.286244207 | 0.053030523 |
| SODIUM ION TRANSMEMBRANE TRANSPORTER ACTIVITY                                | 98  | 0.080130794  | 0.340177061 |
| NUCLEOTIDYLTRANSFERASE ACTIVITY                                              | 120 | -0.071664266 | 0.330682524 |
| CALCIUM DEPENDENT PHOSPHOLIPID BINDING                                       | 43  | 0.039666348  | 0.752672456 |
| CYSTEINE TYPE ENDOPEPTIDASE REGULATOR ACTIVITY INVOLVED IN APOPTOTIC PROCESS | 37  | -0.144630102 | 0.262471256 |
| HISTONE METHYLTRANSFERASE ACTIVITY                                           | 50  | -0.09941254  | 0.379210924 |
| PROTEIN TYROSINE KINASE ACTIVATOR ACTIVITY                                   | 10  | 0.668707226  | 0.004930331 |

**Table S5.** miRNA KEGG.

| GO Term                                    | Genes Tested | Model Coefficient | p-value     |
|--------------------------------------------|--------------|-------------------|-------------|
| GLYCOLYSIS GLUCONEOGENESIS                 | 51           | 0.086839985       | 0.455411028 |
| CITRATE CYCLE TCA CYCLE                    | 24           | -0.265289165      | 0.083377498 |
| PENTOSE PHOSPHATE PATHWAY                  | 24           | -0.019674303      | 0.905861207 |
| PENTOSE AND GLUCURONATE INTERCONVERSIONS   | 14           | 0.148959932       | 0.50234514  |
| FRUCTOSE AND MANNOSE METABOLISM            | 31           | 0.090390152       | 0.54459536  |
| GALACTOSE METABOLISM                       | 23           | -0.252585385      | 0.108567343 |
| ASCORBATE AND ALDARATE METABOLISM          | 14           | 0.425204856       | 0.040108777 |
| FATTY ACID METABOLISM                      | 36           | 0.172475471       | 0.214289114 |
| STEROID BIOSYNTHESIS                       | 17           | 0.027800582       | 0.889256788 |
| PRIMARY BILE ACID BIOSYNTHESIS             | 10           | -0.065788934      | 0.795829563 |
| STEROID HORMONE BIOSYNTHESIS               | 31           | 0.080971131       | 0.586752658 |
| OXIDATIVE PHOSPHORYLATION                  | 117          | -0.189274084      | 0.008315894 |
| PURINE METABOLISM                          | 140          | -0.029314177      | 0.670943505 |
| PYRIMIDINE METABOLISM                      | 94           | -0.193629857      | 0.015636249 |
| ALANINE ASPARTATE AND GLUTAMATE METABOLISM | 29           | 0.179648713       | 0.248632551 |
| GLYCINE SERINE AND THREONINE METABOLISM    | 25           | -0.025955463      | 0.873301241 |
| CYSTEINE AND METHIONINE METABOLISM         | 28           | -0.148902781      | 0.314587712 |
| VALINE LEUCINE AND ISOLEUCINE DEGRADATION  | 40           | 0.132735735       | 0.313751259 |
| VALINE LEUCINE AND ISOLEUCINE BIOSYNTHESIS | 10           | -0.536615378      | 0.013491591 |
| LYSINE DEGRADATION                         | 41           | 0.143340515       | 0.273694265 |
| ARGININE AND PROLINE METABOLISM            | 47           | -0.102166864      | 0.379565542 |
| HISTIDINE METABOLISM                       | 26           | 0.185573404       | 0.255608147 |

|                                                          |     |              |             |
|----------------------------------------------------------|-----|--------------|-------------|
| TYROSINE METABOLISM                                      | 34  | 0.048999051  | 0.729496099 |
| PHENYLALANINE METABOLISM                                 | 17  | 0.033968996  | 0.865006001 |
| TRYPTOPHAN METABOLISM                                    | 37  | 0.371465014  | 0.004311241 |
| BETA ALANINE METABOLISM                                  | 20  | 0.238859404  | 0.199652948 |
| TAURINE AND HYPOTAURINE METABOLISM                       | 7   | -0.389910262 | 0.139718185 |
| SELENOAMINO ACID METABOLISM                              | 22  | -0.125539523 | 0.45595029  |
| GLUTATHIONE METABOLISM                                   | 42  | -0.252266837 | 0.029677269 |
| STARCH AND SUCROSE METABOLISM                            | 32  | 0.145092182  | 0.324982609 |
| N GLYCAN BIOSYNTHESIS                                    | 46  | -0.33193439  | 0.002082826 |
| OTHER GLYCAN DEGRADATION                                 | 14  | -0.011049438 | 0.959610969 |
| O GLYCAN BIOSYNTHESIS                                    | 25  | 0.043688017  | 0.791351789 |
| AMINO SUGAR AND NUCLEOTIDE SUGAR METABOLISM              | 41  | 0.249512777  | 0.054330266 |
| GLYCOSAMINOGLYCAN DEGRADATION                            | 20  | 0.019603398  | 0.915045686 |
| GLYCOSAMINOGLYCAN BIOSYNTHESIS CHONDROITIN SULFATE       | 20  | -0.041011614 | 0.821069681 |
| GLYCOSAMINOGLYCAN BIOSYNTHESIS KERATAN SULFATE           | 15  | -0.573068168 | 0.000803476 |
| GLYCOSAMINOGLYCAN BIOSYNTHESIS HEPARAN SULFATE           | 21  | 0.092389623  | 0.610581314 |
| GLYCEROLIPID METABOLISM                                  | 42  | 0.313917426  | 0.013405506 |
| INOSITOL PHOSPHATE METABOLISM                            | 50  | -0.035881797 | 0.754872678 |
| GLYCOSYLPHOSPHATIDYLINOSITOL GPI ANCHOR BIOSYNTHESIS     | 24  | -0.206396706 | 0.188111274 |
| GLYCEROPHOSPHOLIPID METABOLISM                           | 64  | 0.058682789  | 0.571117537 |
| ETHER LIPID METABOLISM                                   | 24  | 0.16427567   | 0.334607044 |
| ARACHIDONIC ACID METABOLISM                              | 39  | 0.061984024  | 0.640075637 |
| LINOLEIC ACID METABOLISM                                 | 16  | 0.24381306   | 0.234783868 |
| ALPHA LINOLENIC ACID METABOLISM                          | 12  | 0.28226344   | 0.227499904 |
| SPHINGOLIPID METABOLISM                                  | 34  | -0.152548295 | 0.25593084  |
| GLYCOSPHINGOLIPID BIOSYNTHESIS LACTO AND NEOLACTO SERIES | 20  | -0.458427715 | 0.003130447 |
| GLYCOSPHINGOLIPID BIOSYNTHESIS GLOBO SERIES              | 11  | -0.153196482 | 0.514669399 |
| GLYCOSPHINGOLIPID BIOSYNTHESIS GANGLIO SERIES            | 14  | -0.159898158 | 0.441877818 |
| PYRUVATE METABOLISM                                      | 33  | 0.06450252   | 0.65463585  |
| GLYOXYLATE AND DICARBOXYLATE METABOLISM                  | 15  | 0.10864743   | 0.613397898 |
| PROPANOATE METABOLISM                                    | 28  | 0.161000876  | 0.306782463 |
| BUTANOATE METABOLISM                                     | 26  | 0.255951368  | 0.117952882 |
| ONE CARBON POOL BY FOLATE                                | 15  | -0.104974854 | 0.608489799 |
| RIBOFLAVIN METABOLISM                                    | 12  | -0.22583088  | 0.305129812 |
| NICOTINATE AND NICOTINAMIDE METABOLISM                   | 21  | -0.350188248 | 0.030001492 |
| PANTOTHENATE AND COA BIOSYNTHESIS                        | 13  | 0.119531644  | 0.603729758 |
| FOLATE BIOSYNTHESIS                                      | 10  | -0.035480172 | 0.889994649 |
| RETINOL METABOLISM                                       | 37  | 0.130530243  | 0.33944954  |
| PORPHYRIN AND CHLOROPHYLL METABOLISM                     | 26  | -0.061830546 | 0.696091965 |
| TERPENOID BACKBONE BIOSYNTHESIS                          | 13  | 0.083718812  | 0.71589081  |
| LIMONENE AND PINENE DEGRADATION                          | 9   | 0.226657612  | 0.420306537 |
| NITROGEN METABOLISM                                      | 20  | 0.05760745   | 0.755399287 |
| SULFUR METABOLISM                                        | 10  | -0.010868982 | 0.966414932 |
| AMINOACYL TRNA BIOSYNTHESIS                              | 39  | -0.278349764 | 0.022953317 |
| METABOLISM OF XENOBIOTICS BY CYTOCHROME P450             | 44  | 0.011808123  | 0.924016275 |
| DRUG METABOLISM CYTOCHROME P450                          | 45  | 0.039761885  | 0.74657885  |
| DRUG METABOLISM OTHER ENZYMES                            | 35  | 0.052612623  | 0.706530336 |
| BIOSYNTHESIS OF UNSATURATED FATTY ACIDS                  | 21  | 0.117346917  | 0.519237599 |
| ABC TRANSPORTERS                                         | 34  | 0.145544771  | 0.309503963 |
| RIBOSOME                                                 | 87  | -0.188369664 | 0.023638851 |
| RNA DEGRADATION                                          | 55  | -0.062313742 | 0.566913584 |
| RNA POLYMERASE                                           | 29  | -0.019671572 | 0.896606675 |
| BASAL TRANSCRIPTION FACTORS                              | 33  | -0.115112719 | 0.404607685 |
| DNA REPLICATION                                          | 35  | -0.06750072  | 0.619975072 |
| SPLICEOSOME                                              | 122 | -0.23692353  | 0.000652637 |
| PROTEASOME                                               | 42  | -0.263346106 | 0.021784354 |
| PROTEIN EXPORT                                           | 22  | 0.089024663  | 0.615111853 |
| PPAR SIGNALING PATHWAY                                   | 55  | 0.117593203  | 0.295213197 |
| BASE EXCISION REPAIR                                     | 32  | -0.018339067 | 0.898773128 |
| NUCLEOTIDE EXCISION REPAIR                               | 40  | 0.182883565  | 0.167744933 |
| MISMATCH REPAIR                                          | 22  | -0.120146478 | 0.480262255 |
| HOMOLOGOUS RECOMBINATION                                 | 25  | 0.02686363   | 0.870393858 |
| NON HOMOLOGOUS END JOINING                               | 12  | 0.130210544  | 0.592262538 |
| MAPK SIGNALING PATHWAY                                   | 239 | 0.019156852  | 0.720524388 |
| ERBB SIGNALING PATHWAY                                   | 84  | 0.044065199  | 0.625638717 |
| CALCIUM SIGNALING PATHWAY                                | 147 | 0.046854469  | 0.493353681 |

|                                              |     |              |             |
|----------------------------------------------|-----|--------------|-------------|
| CYTOKINE CYTOKINE RECEPTOR INTERACTION       | 197 | 0.114133857  | 0.055816811 |
| CHEMOKINE SIGNALING PATHWAY                  | 157 | 0.074599269  | 0.262064248 |
| PHOSPHATIDYLINOSITOL SIGNALING SYSTEM        | 71  | -0.017883992 | 0.853608295 |
| NEUROACTIVE LIGAND RECEPTOR INTERACTION      | 176 | 0.114455685  | 0.069248059 |
| CELL CYCLE                                   | 121 | -0.243360441 | 0.000458837 |
| OOCYTE MEIOSIS                               | 99  | -0.156602926 | 0.047094014 |
| P53 SIGNALING PATHWAY                        | 67  | -0.327351759 | 0.000263952 |
| UBIQUITIN MEDIATED PROTEOLYSIS               | 126 | -0.013995674 | 0.847873264 |
| SNARE INTERACTIONS IN VESICULAR TRANSPORT    | 35  | -0.109239706 | 0.416062398 |
| REGULATION OF AUTOPHAGY                      | 24  | 0.271925017  | 0.108318003 |
| LYSOSOME                                     | 112 | -0.141638892 | 0.058027072 |
| ENDOCYTOSIS                                  | 168 | 0.081006298  | 0.208567918 |
| PEROXISOME                                   | 68  | -0.082503013 | 0.396446512 |
| MTOR SIGNALING PATHWAY                       | 50  | 0.136772155  | 0.246736972 |
| APOPTOSIS                                    | 81  | -0.071539329 | 0.424265257 |
| CARDIAC MUSCLE CONTRACTION                   | 64  | -0.042838652 | 0.672836994 |
| VASCULAR SMOOTH MUSCLE CONTRACTION           | 93  | 0.111262424  | 0.198425407 |
| WNT SIGNALING PATHWAY                        | 135 | -0.01812849  | 0.796894705 |
| DORSO VENTRAL AXIS FORMATION                 | 23  | 0.354126129  | 0.045193107 |
| NOTCH SIGNALING PATHWAY                      | 44  | -0.059837574 | 0.623102624 |
| HEDGEHOG SIGNALING PATHWAY                   | 47  | 0.389877301  | 0.001122923 |
| TGF BETA SIGNALING PATHWAY                   | 74  | -0.060282274 | 0.52113682  |
| AXON GUIDANCE                                | 120 | 0.198384807  | 0.009770492 |
| VEGF SIGNALING PATHWAY                       | 66  | 0.055768445  | 0.584481413 |
| FOCAL ADHESION                               | 190 | -0.023027736 | 0.698354113 |
| ECM RECEPTOR INTERACTION                     | 77  | 0.103142188  | 0.277781019 |
| CELL ADHESION MOLECULES CAMS                 | 112 | -0.147046917 | 0.048219664 |
| ADHERENS JUNCTION                            | 70  | -0.187333193 | 0.044477508 |
| TIGHT JUNCTION                               | 117 | -0.091880439 | 0.215581484 |
| GAP JUNCTION                                 | 75  | -0.107065783 | 0.245192047 |
| COMPLEMENT AND COAGULATION CASCADES          | 53  | 0.178137584  | 0.119091123 |
| ANTIGEN PROCESSING AND PRESENTATION          | 62  | -0.067525289 | 0.509532107 |
| RENIN ANGIOTENSIN SYSTEM                     | 13  | 0.049530042  | 0.828793856 |
| TOLL LIKE RECEPTOR SIGNALING PATHWAY         | 88  | 0.121832337  | 0.17083461  |
| NOD LIKE RECEPTOR SIGNALING PATHWAY          | 52  | -0.029106357 | 0.796519449 |
| RIG I LIKE RECEPTOR SIGNALING PATHWAY        | 58  | -0.072328502 | 0.493712139 |
| CYTOSOLIC DNA SENSING PATHWAY                | 42  | -0.030829541 | 0.805944877 |
| JAK STAT SIGNALING PATHWAY                   | 122 | -0.07186557  | 0.325589879 |
| HEMATOPOIETIC CELL LINEAGE                   | 63  | 0.004190156  | 0.967666214 |
| NATURAL KILLER CELL MEDIATED CYTOTOXICITY    | 100 | -0.037634439 | 0.643735047 |
| T CELL RECEPTOR SIGNALING PATHWAY            | 92  | 0.108896895  | 0.211231083 |
| B CELL RECEPTOR SIGNALING PATHWAY            | 65  | 0.08630121   | 0.403484465 |
| FC EPSILON RI SIGNALING PATHWAY              | 66  | 0.013277609  | 0.89561148  |
| FC GAMMA R MEDIATED PHAGOCYTOSIS             | 82  | -0.093354097 | 0.291626452 |
| LEUKOCYTE TRANSENDOTHELIAL MIGRATION         | 104 | -0.210228671 | 0.005547248 |
| INTESTINAL IMMUNE NETWORK FOR IGA PRODUCTION | 38  | -0.069411851 | 0.594803569 |
| CIRCADIAN RHYTHM MAMMAL                      | 13  | 0.678853705  | 0.000503987 |
| LONG TERM POTENTIATION                       | 66  | -0.078636531 | 0.426710361 |
| NEUROTROPHIN SIGNALING PATHWAY               | 124 | -0.057048626 | 0.433172455 |
| LONG TERM DEPRESSION                         | 57  | -0.094207046 | 0.374287321 |
| OLFACTORY TRANSDUCTION                       | 71  | 0.220839306  | 0.024510902 |
| TASTE TRANSDUCTION                           | 26  | 0.247973006  | 0.127611462 |
| REGULATION OF ACTIN CYTOSKELETON             | 189 | 0.020740985  | 0.730153809 |
| INSULIN SIGNALING PATHWAY                    | 127 | -0.086190527 | 0.227056477 |
| GNRH SIGNALING PATHWAY                       | 85  | 0.041827117  | 0.641029893 |
| PROGESTERONE MEDIATED OOCYTE MATURATION      | 78  | 0.040843123  | 0.662602211 |
| MELANOGENESIS                                | 90  | -0.034343336 | 0.688958402 |
| ADIPOCYTOKINE SIGNALING PATHWAY              | 60  | -0.095856812 | 0.352711327 |
| TYPE II DIABETES MELLITUS                    | 43  | 0.069849865  | 0.580565064 |
| TYPE I DIABETES MELLITUS                     | 34  | -0.298089065 | 0.018836224 |
| MATURITY ONSET DIABETES OF THE YOUNG         | 18  | 0.477260725  | 0.006825543 |
| ALDOSTERONE REGULATED SODIUM REABSORPTION    | 36  | 0.114051027  | 0.412648701 |
| VASOPRESSIN REGULATED WATER REABSORPTION     | 42  | -0.02272262  | 0.856607943 |
| PROXIMAL TUBULE BICARBONATE RECLAMATION      | 19  | 0.140470432  | 0.462558813 |
| ALZHEIMERS DISEASE                           | 146 | -0.258184297 | 4.02E-05    |
| PARKINSONS DISEASE                           | 113 | -0.212621177 | 0.00343061  |

|                                                            |     |              |             |
|------------------------------------------------------------|-----|--------------|-------------|
| AMYOTROPHIC LATERAL SCLEROSIS ALS                          | 46  | -0.051571762 | 0.665660099 |
| HUNTINGTONS DISEASE                                        | 158 | -0.173594822 | 0.00538128  |
| PRION DISEASES                                             | 31  | 0.009092079  | 0.950800365 |
| VIBRIO CHOLERAEE INFECTION                                 | 49  | -0.224078789 | 0.041796344 |
| EPITHELIAL CELL SIGNALING IN HELICOBACTER PYLORI INFECTION | 63  | -0.184096035 | 0.062692212 |
| PATHOGENIC ESCHERICHIA COLI INFECTION                      | 49  | -0.170528156 | 0.128093682 |
| LEISHMANIA INFECTION                                       | 61  | 0.035114871  | 0.739660063 |
| PATHWAYS IN CANCER                                         | 303 | -0.067838326 | 0.146682412 |
| COLORECTAL CANCER                                          | 58  | -0.052384957 | 0.622259112 |
| RENAL CELL CARCINOMA                                       | 69  | 0.118793421  | 0.238998532 |
| PANCREATIC CANCER                                          | 67  | 0.085575732  | 0.400220285 |
| ENDOMETRIAL CANCER                                         | 49  | 0.097691169  | 0.411938414 |
| GLIOMA                                                     | 64  | -0.007426058 | 0.942134567 |
| PROSTATE CANCER                                            | 82  | -0.039235229 | 0.662100444 |
| THYROID CANCER                                             | 26  | 0.11822023   | 0.470540566 |
| BASAL CELL CARCINOMA                                       | 48  | 0.01233699   | 0.917128245 |
| MELANOMA                                                   | 65  | 0.121683281  | 0.240461496 |
| BLADDER CANCER                                             | 41  | -0.224463067 | 0.062140541 |
| CHRONIC MYELOID LEUKEMIA                                   | 70  | -0.074096902 | 0.441763346 |
| ACUTE MYELOID LEUKEMIA                                     | 55  | 0.084671243  | 0.450381446 |
| SMALL CELL LUNG CANCER                                     | 81  | -0.237245423 | 0.005153162 |
| NON SMALL CELL LUNG CANCER                                 | 51  | 0.020001099  | 0.86219568  |
| ASTHMA                                                     | 17  | -0.029470685 | 0.881151206 |
| AUTOIMMUNE THYROID DISEASE                                 | 32  | -0.250158796 | 0.060042432 |
| SYSTEMIC LUPUS ERYTHEMATOSUS                               | 110 | 0.022747516  | 0.772372971 |
| ALLOGRAFT REJECTION                                        | 28  | -0.341992324 | 0.011993536 |
| GRAFT VERSUS HOST DISEASE                                  | 30  | -0.292831104 | 0.031294545 |
| PRIMARY IMMUNODEFICIENCY                                   | 27  | 0.120385409  | 0.451860038 |
| HYPERTROPHIC CARDIOMYOPATHY HCM                            | 73  | -0.058859852 | 0.534035123 |
| ARRHYTHMOGENIC RIGHT VENTRICULAR CARDIOMYOPATHY ARVC       | 67  | -0.082319622 | 0.401894231 |
| DILATED CARDIOMYOPATHY                                     | 78  | 0.024037332  | 0.796737622 |
| VIRAL MYOCARDITIS                                          | 60  | -0.182870217 | 0.070994807 |
